# Supplementary material for: The system of self-consistent semi-correlations as one of the tools of cheminformatics for designing antiviral drugs
Source: Royal Society of Chemistry journal article supplement (doi:10.1039/d1nj03394h), 2021-01-01
Supplement: d1nj03394h1.xlsx [file d1nj03394h1.xlsx]

## Sheet: Comments
The system of self-consistent semi-correlations as one of the tools of cheminformatics for design antiviral drugs
Set
Symbol ‘+’ means the active training set;
Symbol ‘-’ means the passive training set;
Symbol ‘#’ means the calibration set;
Symbol ‘*’ means the validation set.
ID
This is the numbering from original work (Alves et al., 2020).
DCW
This is descriptor DCW(1,15) calculated with Equation Mdx (x=1,2, ..., 10)
Expr
This is experimental values 1 for active and 0 for inactive compounds.
Calc
This is the model for Expr.
Class
True positive (TP) if Expr=1 and Calc ⩾0.5;
True positive (TN) if Expr=0 and Calc <0.5;
True positive (FP) if Expr=0 and Calc ⩾0.5;
True positive (FN) if Expr=1 and Calc <0.5;
d-Splits represented as Table S1, Table S2, …, Table S10

## Sheet: Table S1
Set	ID	SMILES	DCW	Expr	Calc	Expr-Calc	Class	DefectSMILES	Applicability
*	6	CN1CCN(CCCN2c3ccccc3Sc3ccc(C(F)(F)F)cc32)CC1	27.6567	1	1.0724	-0.0724	TP	0.0477	YES
*	1498	c1ccc(CNCCNCc2ccccc2)cc1	8.58634	0	0.3272	-0.3272	TN	0.0208	YES
*	10	CN1C2CCC1CC(OC(c1ccccc1)c1ccccc1)C2	19.5999	1	0.7576	0.2424	TP	0.0197	YES
+	3255	c1cc(Nc2cc(C3CC3)n[nH]2)nc(Nc2ccc3nc[nH]c3c2)n1	11.2278	0	0.4304	-0.4304	TN	0.0369	YES
#	13	CN(C)CCC=C1c2ccccc2Sc2ccc(Cl)cc21	25.3881	1	0.9837	0.0163	TP	0.0344	YES
#	290	CCN(CC)C(=S)SSC(=S)N(CC)CC	11.6851	0	0.4483	-0.4483	TN	0.0338	YES
+	15	c1cc(-c2sc(-c3ccncc3)c(-c3ccncc3)c2-c2ccncc2)ccn1	24.5567	1	0.9513	0.0487	TP	0.0502	YES
-	3712	O=C(CCNC(=O)c1ccc(OC(F)(F)F)cc1)NC1CCCc2ccccc21	16.2296	0	0.6258	-0.6258	FP	0.0402	YES
*	16	CN(C)CCC=C1c2ccccc2C=Cc2ccccc21	24.2638	1	0.9398	0.0602	TP	0.0233	YES
*	2297	O=c1cc(-c2ccc(O)c(-c3c(O)cc(O)c4c(=O)cc(-c5ccc(O)cc5)oc34)c2)oc2cc(O)cc(O)c12	0.41904	0	0.008	-0.008	TN	3.0693	No
#	20	CN(C)c1ccccc1CN1CCCN(Cc2ccccc2N(C)C)C1c1ccncc1	25.6726	1	0.9949	0.0051	TP	0.0314	YES
#	1679	C#CC1(O)CCC2C3CCC4=CC(=O)CCC4C3C(=C)CC21CC	16.0138	0	0.6174	-0.6174	FP	0.0383	YES
*	21	CN1CCC(CN2c3ccccc3Sc3ccccc32)C1	24.5068	1	0.9493	0.0507	TP	0.0275	YES
-	2631	COC1CC(OC2C(C)=CCC3CC(CC4(CCC(C)C(C5CCCCC5)O4)O3)OC(=O)C3C=C(C)C(=NO)C4OCC(=CC=CC2C)C34O)OC(C)C1O	11.3271	0	0.4343	-0.4343	TN	1.102	No
*	22	CNCCC=C1c2ccccc2CCc2ccccc21	20.1102	1	0.7775	0.2225	TP	0.0225	YES
-	1499	CCCc1ccc(C(=O)O)cc1	2.50055	0	0.0893	-0.0893	TN	0.0086	YES
*	25	O=C1CSC2(CCN(CCCN3c4ccccc4Sc4ccc(Cl)cc43)CC2)N1	22.4674	1	0.8696	0.1304	TP	2.0435	No
-	1639	O=C(O[Ca]OC(=O)C(CC(=O)N1CC2CCCCC2C1)Cc1ccccc1)C(CC(=O)N1CC2CCCCC2C1)Cc1ccccc1	11.3519	0	0.4352	-0.4352	TN	0.0445	YES
+	34	Clc1ccc2c(c1)C(N1CCNCC1)=Nc1ccccc1O2	10.9467	1	0.4194	0.5806	FN	3.0246	No
#	3738	CNS(=O)(=O)Nc1nccc(Cc2c(C)c3ccc(Oc4ncccn4)cc3oc2=O)c1F	1.89562	0	0.0657	-0.0657	TN	0.0603	YES
+	56	CN(C)CCC=C1c2ccccc2CCc2ccccc21	24.0787	1	0.9326	0.0674	TP	0.0215	YES
*	1791	CCC1NC(=O)c2cc(S(N)(=O)=O)c(Cl)cc2N1	8.68913	0	0.3312	-0.3312	TN	0.0212	YES
#	57	CCCCc1oc2ccccc2c1C(=O)c1cc(I)c(OCCN(CC)CC)c(I)c1	26.6857	1	1.0345	-0.0345	TP	0.0312	YES
*	1348	Cc1cc(NS(=O)(=O)c2ccc(N)cc2)nc(C)n1	-10.9216	0	-0.4352	0.4352	TN	0.0288	YES
*	72	CC(C)COCC(CN(Cc1ccccc1)c1ccccc1)N1CCCC1	22.6693	1	0.8775	0.1225	TP	0.0221	YES
+	1482	C#CC1(OC(C)=O)CCC2C3CCC4=CC(OC(C)=O)CCC4C3CCC21C	13.9514	0	0.5368	-0.5368	FP	0.0398	YES
#	99	CN1CCC(=C2c3ccccc3C=Cc3ccccc32)CC1	24.7954	1	0.9606	0.0394	TP	0.0306	YES
*	2670	O=c1[nH]c(=O)c2[nH]c(=O)[nH]c2[nH]1	-5.57626	0	-0.2263	0.2263	TN	3.0131	No
*	100	CN1CCN(C2=Nc3cc(Cl)ccc3Nc3ccccc32)CC1	20.6242	1	0.7976	0.2024	TP	1.0352	No
#	2663	CC1(C)OC2CC3C4CCC5=CC(=O)C=CC5(C)C4C(O)CC3(C)C2(C(=O)CO)O1	5.21665	0	0.1955	-0.1955	TN	0.0689	YES
#	101	CCN(CC)CCCC(C)Nc1ccnc2cc(Cl)ccc12	14.2275	1	0.5476	0.4524	TP	0.0179	YES
-	1784	NS(=O)(=O)c1cc2c(cc1Cl)NC(CC1CCCC1)NS2(=O)=O	2.88432	0	0.1043	-0.1043	TN	1.037	No
-	104	CN(C)CCCN1c2ccccc2CCc2ccc(Cl)cc21	19.9848	1	0.7726	0.2274	TP	0.0213	YES
*	1318	COc1cc2c(c(OC)c1OC)-c1c(cc(OC)c(OC)c1OC)CC(C)C(C)C2	12.8785	0	0.4949	-0.4949	TN	0.0248	YES
#	106	CN(C)CCCN1c2ccccc2Sc2ccc(Cl)cc21	23.8223	1	0.9226	0.0774	TP	0.0326	YES
*	1063	CC(CCC(=O)O)C1CCC2C3C(O)CC4CC(O)CCC4(C)C3CC(O)C12C	4.54133	0	0.1691	-0.1691	TN	0.0351	YES
+	116	CNCCCN1c2ccccc2CCc2ccccc21	18.5443	1	0.7163	0.2837	TP	0.0207	YES
+	2705	Clc1ccc2c(N3CCN(CCCN4CCN(c5ccnc6cc(Cl)ccc56)CC4)CC3)ccnc2c1	7.73722	0	0.294	-0.294	TN	8.0565	No
-	121	CCN(CC)CCOC(=O)C1(C2CCCCC2)CCCCC1	12.8426	1	0.4935	0.5065	FN	0.0216	YES
+	407	COc1ccc(C(Cl)=C(c2ccc(OC)cc2)c2ccc(OC)cc2)cc1	10.6029	0	0.406	-0.406	TN	1.0273	No
+	129	O=c1c2ccccc2[se]n1-c1ccccc1	17.3069	1	0.6679	0.3321	TP	4.0142	No
#	3687	CCC(=O)OC1CC(=O)OC(C)CC=CC=CC(OC(C)=O)C(C)CC(CC=O)C(OC2OC(C)C(OC3CC(C)(OC(C)=O)C(OC(=O)CC)C(C)O3)C(N(C)C)C2O)C1OC	-7.02892	0	-0.2831	0.2831	TN	0.0674	YES
-	133	CNCCC(Oc1ccc(C(F)(F)F)cc1)c1ccccc1	14.0447	1	0.5405	0.4595	TP	0.0318	YES
+	1488	C#CC1(O)CCC2C3CCc4cc(OC5CCCC5)ccc4C3CCC21C	8.85107	0	0.3375	-0.3375	TN	0.0769	YES
#	152	O=C1Nc2ccc(I)cc2C1=Cc1cc(Br)c(O)c(Br)c1	20.2718	1	0.7838	0.2162	TP	0.0281	YES
#	3379	Cc1c(-c2cnccn2)ssc1=S	3.87821	0	0.1432	-0.1432	TN	0.0215	YES
#	166	O=S(=O)(c1cccc2c(I)cccc12)N1CCCNCC1	6.52848	1	0.2467	0.7533	FN	0.028	YES
+	390	CNNCc1ccc(C(=O)NC(C)C)cc1	0.92015	0	0.0276	-0.0276	TN	2.0165	No
-	169	CN(C)CCCN1c2ccccc2CCc2ccccc21	22.5129	1	0.8714	0.1286	TP	0.0197	YES
*	3930	CN(CC(O)CO)C(=O)c1c(I)c(NC(=O)C(CO)CO)c(I)c(C(=O)N(C)CC(O)CO)c1I	9.58852	0	0.3663	-0.3663	TN	0.0193	YES
#	177	CCCc1c(OCCCOc2ccc(OCC(=O)O)cc2)ccc(C(C)=O)c1O	8.56188	1	0.3262	0.6738	FN	0.0268	YES
#	1774	CCNCC(O)c1cccc(O)c1	4.02565	0	0.1489	-0.1489	TN	0.0105	YES
*	181	CN(C)C(=O)C(CCN1CCC(O)(c2ccc(Cl)cc2)CC1)(c1ccccc1)c1ccccc1	20.4184	1	0.7895	0.2105	TP	0.0294	YES
-	3037	CC(C)n1cnc2c(NCCCCCCNC(=O)OC(C)(C)C)nc(NCCO)nc21	6.41341	0	0.2422	-0.2422	TN	0.0406	YES
#	185	CCOC(=O)N1CCC(=C2c3ccc(Cl)cc3CCc3cccnc32)CC1	22.1578	1	0.8575	0.1425	TP	0.0354	YES
-	3906	Cc1c(Cl)cccc1S(=O)(=O)Nc1nc(CCN2CCOCC2=O)cs1	16.1042	0	0.6209	-0.6209	FP	1.0384	No
#	208	CNCCCC12CCC(c3ccccc31)c1ccccc12	17.6209	1	0.6802	0.3198	TP	0.0241	YES
-	3460	NC(=O)C(CC1CC1)C(CCC(F)(F)F)C(=O)NC1N=C(c2ccccc2)c2cccc(F)c2NC1=O	12.8838	0	0.4951	-0.4951	TN	1.0579	No
*	212	COc1ccccc1N1CCN(CC(O)COc2cccc3ccccc23)CC1	20.6384	1	0.7981	0.2019	TP	1.0294	No
*	608	CC1(C)OC2CC3C4CC(F)C5=CC(=O)C=CC5(C)C4(F)C(O)CC3(C)C2(C(=O)CO)O1	4.66067	0	0.1737	-0.1737	TN	0.0747	YES
#	216	COC(=O)C1=C(C)NC(C)=C(C(=O)OCCN(C)Cc2ccccc2)C1c1cccc([N+](=O)[O-])c1	19.2727	1	0.7448	0.2552	TP	0.0381	YES
+	3329	O=C(c1ccccc1)c1ccc2nc(NC(=O)c3csc(C4CCN(c5ncnc6ccsc56)CC4)n3)[nH]c2c1	-11.6223	0	-0.4626	0.4626	TN	15.0636	No
+	222	CCN(CC)CC#CCOC(=O)C(O)(c1ccccc1)C1CCCCC1	18.8241	1	0.7272	0.2728	TP	0.0272	YES
-	633	Cc1onc(-c2ccccc2)c1C(=O)NC1C(=O)N2C1SC(C)(C)C2C(=O)O	8.27501	0	0.315	-0.315	TN	0.0479	YES
#	223	Cc1ccccc1C(OCCN(C)C)c1ccccc1	15.4803	1	0.5966	0.4034	TP	0.0148	YES
+	3648	Nc1cccc(C(OCCN2CCCCC2)c2cc3nccc(C(=O)O)c3s2)c1	10.6218	0	0.4067	-0.4067	TN	0.0309	YES
-	224	O=c1[nH]c2ccccc2n1CCCN1CCN(C(c2ccccc2)c2ccccc2)CC1	24.579	1	0.9521	0.0479	TP	3.0298	No
#	1162	COCCCOc1ccnc(CS(=O)c2nc3ccccc3[nH]2)c1C	9.0896	0	0.3468	-0.3468	TN	0.0298	YES
#	233	CC(CN1c2ccccc2Sc2ccccc21)N(C)C	28.8567	1	1.1193	-0.1193	TP	0.0309	YES
+	2085	CCCCCCCCCCCCCCCCCCNC(=O)OC1CCN(C(=O)OCC(COC(=O)N(Cc2cccc[n+]2CC)C(=O)c2ccccc2OC)OC)CC1	13.8624	0	0.5333	-0.5333	FP	0.0562	YES
-	235	CCCNCC(O)COc1ccccc1C(=O)CCc1ccccc1	14.5779	1	0.5613	0.4387	TP	0.0207	YES
-	830	c1ccc2c(c1)Nc1ccccc1S2	15.0408	0	0.5794	-0.5794	FP	0.0215	YES
#	239	OCCN1CCN(CCCN2c3ccccc3Sc3ccc(Cl)cc32)CC1	24.9051	1	0.9649	0.0351	TP	0.0348	YES
*	1752	COC1(NC(=O)C(C(=O)O)c2ccc(O)cc2)C(=O)N2C(C(=O)O)=C(CSc3nnnn3C)COC21	2.55514	0	0.0915	-0.0915	TN	0.0484	YES
#	240	CN(C)CCCN1c2ccccc2Sc2ccccc21	26.3504	1	1.0214	-0.0214	TP	0.0311	YES
#	1966	CC1NCc2cc(-c3ccc4c(=O)c(C(=O)O)cn(C5CC5)c4c3OC(F)F)ccc21	1.95366	0	0.068	-0.068	TN	0.0984	YES
+	246	CCC(=O)c1ccc2c(c1)N(CCCN(C)C)c1ccccc1S2	22.3534	1	0.8652	0.1348	TP	0.029	YES
#	3197	Cc1cc(N2CCN(C3CNC(C(=O)N4CCSC4)C3)CC2)n(-c2ccccc2)n1	2.84661	0	0.1029	-0.1029	TN	0.0482	YES
+	250	CNCCCC1c2ccccc2C=Cc2ccccc21	17.9732	1	0.694	0.306	TP	0.0238	YES
#	1731	CCCCN1CCCCC1C(=O)Nc1c(C)cccc1C	7.20304	0	0.2731	-0.2731	TN	0.0185	YES
*	252	CN1CCN(CCCN2c3ccccc3Sc3ccc(Cl)cc32)CC1	23.8247	1	0.9227	0.0773	TP	0.0321	YES
#	3624	CC(O)C(O)C1CNc2[nH]c(N)nc(=O)c2N1	1.10625	0	0.0348	-0.0348	TN	0.0228	YES
-	262	COC(=O)C1C2CC3c4[nH]c5cc(OC)ccc5c4CCN3CC2CC(OC(=O)c2cc(OC)c(OC)c(OC)c2)C1OC	19.8525	1	0.7674	0.2326	TP	0.0465	YES
*	2964	CC(C)OC(=O)CCCC=CCC1C(O)CC(O)C1C=CC(O)COc1cccc(C(F)(F)F)c1	15.5363	0	0.5988	-0.5988	FP	0.0413	YES
-	263	O=C(c1ccc(OCCN2CCCCC2)cc1)c1c(-c2ccc(O)cc2)sc2cc(O)ccc12	15.1478	1	0.5836	0.4164	TP	1.0387	No
-	2409	COc1ccc(-n2nc(CCC(=O)N(C)O)cc2-c2ccc(Cl)cc2)cc1	6.44361	0	0.2434	-0.2434	TN	0.0344	YES
+	278	Oc1ccc(-c2nc(-c3ccncc3)c(-c3ccc(F)cc3)[nH]2)cc1	17.6199	1	0.6802	0.3198	TP	0.0431	YES
-	1231	OCC1OC(O)C(O)C(O)C1O	3.02518	0	0.1098	-0.1098	TN	0.0092	YES
#	279	O=C(CCCN1CCC2(CC1)C(=O)NCN2c1ccccc1)c1ccc(F)cc1	24.8284	1	0.9619	0.0381	TP	0.0309	YES
#	1011	CCCc1nc(C(C)(C)O)c(C(=O)OCc2oc(=O)oc2C)n1Cc1ccc(-c2ccccc2-c2nn[nH]n2)cc1	1.52858	0	0.0513	-0.0513	TN	0.068	YES
-	288	CN1CCN(CCC=C2c3ccccc3Sc3ccc(S(=O)(=O)N(C)C)cc32)CC1	21.4654	1	0.8305	0.1695	TP	0.0412	YES
+	2469	CCOCCn1c(C2CCN(CCc3ccc(C(C)(C)C(=O)O)cc3)CC2)nc2ccccc21	6.40418	0	0.2419	-0.2419	TN	0.0431	YES
#	291	OC(CCN1CCCCC1)(c1ccccc1)C1CCCCC1	15.9833	1	0.6162	0.3838	TP	0.0222	YES
*	1375	C=C1C(CO)C(O)CC1n1cnc2c(=O)nc(N)[nH]c21	8.8327	0	0.3368	-0.3368	TN	0.0234	YES
#	294	CN(C)CCCN1c2ccccc2Sc2ccc(C(F)(F)F)cc21	27.6542	1	1.0723	-0.0723	TP	0.0483	YES
*	709	O=C(O)C1=CCCN(CCOC(c2ccc(C(F)(F)F)cc2)c2ccc(C(F)(F)F)cc2)C1	15.6655	0	0.6038	-0.6038	FP	0.0593	YES
+	295	CC(CN(C)C)CN1c2ccccc2CCc2ccccc21	26.3102	1	1.0198	-0.0198	TP	0.0194	YES
-	1767	CC(=O)OC1(C(C)=O)CCC2C3C=C(C)C4=CC(=O)CCC4C3CCC21C	1.01607	0	0.0313	-0.0313	TN	0.0363	YES
+	297	Nc1nc(N)c2nc(-c3ccccc3)c(N)nc2n1	6.64755	1	0.2514	0.7486	FN	0.0302	YES
-	3910	COc1ccc(-c2c(Cl)ncn2-c2ccc(S(N)(=O)=O)cc2)cc1F	6.8749	0	0.2603	-0.2603	TN	2.0427	No
-	355	CCCCOc1cc(C(=O)NCCN(CC)CC)c2ccccc2n1	16.7885	1	0.6477	0.3523	TP	0.0235	YES
+	2999	CC=CCC(C)C(=O)C1C(=O)NC(C(C)C)C(=O)N(C)CC(=O)N(C)C(CC(C)C)C(=O)NC(C(C)C)C(=O)N(C)C(CC(C)C)C(=O)NC(C)C(=O)NC(C)C(=O)N(C)C(CC(C)C)C(=O)N(C)C(CC(C)C)C(=O)N(C)C(C(C)C)C(=O)N1C	11.8732	0	0.4556	-0.4556	TN	0.0603	YES
#	372	CN(C(=O)CN(CCO)CC(=O)N(C)C(C)(C)Cc1ccccc1)C(C)(C)Cc1ccccc1	16.0057	1	0.6171	0.3829	TP	0.0343	YES
-	2914	CC(C)n1nc(-c2ccc3oc(N)nc3c2)c2c(N)ncnc21	2.64625	0	0.095	-0.095	TN	0.0353	YES
#	380	CN(C)CCCOc1nn(Cc2ccccc2)c2ccccc12	19.1243	1	0.739	0.261	TP	0.0292	YES
#	3383	CS(=O)(=O)c1ccc(Oc2cc(F)cc(C#N)c2)c2c1C(O)C(F)(F)C2	10.5571	0	0.4042	-0.4042	TN	0.0526	YES
#	417	CN(C)CCC=C1c2ccccc2CSc2ccccc21	22.9262	1	0.8875	0.1125	TP	0.0285	YES
*	914	NCCC(O)C(=O)NC1CC(N)C(OC2OC(CN)C(O)C(O)C2O)C(O)C1OC1OC(CO)C(O)C(N)C1O	4.78381	0	0.1786	-0.1786	TN	0.0416	YES
*	427	CC(C)N=c1cc2n(-c3ccc(Cl)cc3)c3ccccc3nc-2cc1Nc1ccc(Cl)cc1	13.4419	1	0.5169	0.4831	TP	2.0475	No
-	2667	CCCCCCCCCCCCCCCCCCCCCCCCCCCCO	12.3316	0	0.4735	-0.4735	TN	0.0283	YES
-	434	CCCCc1cc2ccccc2c(OCCN(C)C)n1	9.93032	1	0.3797	0.6203	FN	0.0178	YES
#	202	COc1ccc(OC)c(C(O)C(C)N)c1	7.16521	0	0.2716	-0.2716	TN	0.0111	YES
#	435	CCN(CC)CCNc1ccc(CO)c2sc3ccccc3c(=O)c12	16.0481	1	0.6188	0.3812	TP	0.0333	YES
#	3578	CC1CCC2(O)C(C)(C)C3CCC2(C)C1C3	7.79593	0	0.2963	-0.2963	TN	0.021	YES
*	438	CC(=O)c1ccc2c(c1)N(CCCN(C)C)c1ccccc1S2	21.8838	1	0.8468	0.1532	TP	0.028	YES
-	1945	CCC(=C(CC)c1ccc(OP(=O)(O)O)cc1)c1ccc(OP(=O)(O)O)cc1	9.77086	0	0.3734	-0.3734	TN	0.0242	YES
*	442	CC(=O)c1ccc2c(c1)N(CCCN1CCC(CCO)CC1)c1ccccc1S2	28.0235	1	1.0867	-0.0867	TP	0.035	YES
+	1796	CS(=O)(=O)c1ccc(C(O)C(CF)NC(=O)C(Cl)Cl)cc1	2.58011	0	0.0924	-0.0924	TN	2.0251	No
-	452	CN1CCCC1CCOC(C)(c1ccccc1)c1ccc(Cl)cc1	16.1122	1	0.6213	0.3787	TP	0.0213	YES
*	3442	Cc1cc(C)cc(NC(=O)Cc2ccc(OC(C)(C)C(=O)O)cc2)c1	3.85179	0	0.1421	-0.1421	TN	0.0257	YES
*	508	CCN(CC)Cc1cc(Nc2ccnc3cc(Cl)ccc23)ccc1O	18.9751	1	0.7331	0.2669	TP	0.0279	YES
-	489	COC1(NC(=O)C2SC(=C(C(N)=O)C(=O)O)S2)C(=O)N2C(C(=O)O)=C(CSc3nnnn3C)CSC21	2.07054	0	0.0725	-0.0725	TN	0.0567	YES
-	510	COc1cc(C=CC(=O)C=C(O)C=Cc2ccc(O)c(OC)c2)ccc1O	12.2233	1	0.4693	0.5307	FN	0.0243	YES
+	1660	CCCCCCC(=O)OC1CCC2C3CCC4CC(=O)C=C(C)C4(C)C3CCC12C	4.5027	0	0.1676	-0.1676	TN	0.0405	YES
*	532	COc1cc2c3cc1Oc1c(OC)c(OC)cc4c1C(Cc1ccc(O)c(c1)Oc1ccc(cc1)CC3N(C)CC2)N(C)CC4	20.6664	1	0.7992	0.2008	TP	0.0469	YES
-	707	COc1ccc2c(c1)CCC1C2CCC2(C)C(NCCCCCCN3C(=O)C=CC3=O)CCC12	7.65896	0	0.2909	-0.2909	TN	2.0361	No
+	533	COc1ccc2cc1Oc1ccc(cc1)CC1c3cc(c(OC)cc3CCN1C)Oc1c(OC)c(OC)cc3c1C(C2)N(C)CC3	25.9284	1	1.0049	-0.0049	TP	0.0569	YES
-	3265	CN1C(=O)CC(C(=O)NC(Cc2cnc[nH]2)C(=O)N2CCCC2C(N)=O)NC1=O	-9.22984	0	-0.3691	0.3691	TN	0.0355	YES
+	538	Fc1ccc(C(c2ccc(F)cc2)N2CCN(CC=Cc3ccccc3)CC2)cc1	23.4636	1	0.9085	0.0915	TP	2.0364	No
#	2353	CCCCOCCOC(=O)c1cccnc1	7.09464	0	0.2689	-0.2689	TN	0.0134	YES
-	550	COc1cc2nc(N3CCN(C(=O)C4COc5ccccc5O4)CC3)nc(N)c2cc1OC	11.1131	1	0.4259	0.5741	FN	0.0438	YES
-	1150	CC(=O)Oc1c(C)cc(OCC(O)CNC(C)C)c(C)c1C	8.12039	0	0.3089	-0.3089	TN	0.0201	YES
-	582	C1CCC(C(CC2CCCCN2)C2CCCCC2)CC1	13.1944	1	0.5072	0.4928	TP	0.02	YES
#	3300	C#Cc1cccc(Nc2ncnc3cc4c(cc23)OCCOCCOCCO4)c1	13.0717	0	0.5024	-0.5024	FP	0.0459	YES
+	584	CN1CCCN(C(c2ccccc2)c2ccc(Cl)cc2)CC1	11.7874	1	0.4523	0.5477	FN	0.0197	YES
*	2669	CC12CCC(=O)C=C1CCC1C3CCC(O)(C(=O)CO)C3(C)CC(O)C12F	10.9026	0	0.4177	-0.4177	TN	0.0337	YES
#	592	CCN(CCCc1ccccc1)CCCc1ccccc1	17.671	1	0.6822	0.3178	TP	0.0147	YES
#	1692	Clc1ccc(CON=C(Cn2ccnc2)c2ccc(Cl)cc2Cl)c(Cl)c1	18.5472	0	0.7164	-0.7164	FP	0.0425	YES
*	596	CN1CCN(C2=Nc3ccccc3Oc3ccc(Cl)cc32)CC1	15.1919	1	0.5853	0.4147	TP	1.0415	No
+	2800	Oc1cc(-c2[nH]c(-c3ccccc3)nc2-c2ccncc2)ccc1Cl	10.063	0	0.3849	-0.3849	TN	0.0374	YES
+	597	O=C(c1ccc(F)cc1)C1CCN(CCn2c(=O)[nH]c3ccccc3c2=O)CC1	15.1637	1	0.5842	0.4158	TP	0.0393	YES
#	790	Oc1ccc(Cl)cc1	2.1024	0	0.0738	-0.0738	TN	0.0062	YES
+	605	CCCCCC(=O)OC1(C(C)=O)CCC2C3CCC4=CC(=O)CCC4(C)C3CCC21C	6.47258	1	0.2446	0.7554	FN	0.0409	YES
+	2068	CCCCCC=CCC=CCCCCCCCC(=O)NC(C)c1ccccc1	8.99968	0	0.3433	-0.3433	TN	0.0233	YES
-	681	C=C1C(=O)OC2C1CCC(C)=CCCC1(C)OC21	12.0129	1	0.4611	0.5389	FN	0.0265	YES
*	2541	CNC(=O)c1ccc(C)c(-n2c(C)cc(OCc3ccc(F)cc3F)c(Br)c2=O)c1	12.6295	0	0.4852	-0.4852	TN	0.0497	YES
-	687	CNCCCCOc1ccccc1Cc1ccccc1	12.6721	1	0.4868	0.5132	FN	0.0216	YES
*	647	CCC1C(=O)OCC1Cc1cncn1C	1.49422	0	0.05	-0.05	TN	0.0167	YES
+	693	CCC(=C(c1ccccc1)c1ccc(OCCN(C)C)cc1)c1ccccc1	30.4066	1	1.1799	-0.1799	TP	0.0199	YES
-	3667	C=CC(=O)Nc1cccc(Oc2nc(Nc3ccc(N4CCN(C)CC4)cc3)nc3ccsc23)c1	3.13019	0	0.1139	-0.1139	TN	3.0492	No
#	695	Clc1ccc2c(c1)N=C(N1CCNCC1)c1ccccc1N2	14.1331	1	0.5439	0.4561	TP	0.0277	YES
*	3691	CC(NC(=O)CCC(F)(F)F)C(=O)NC1C(=O)N(CCO)c2ncccc2-c2ccccc21	4.44944	0	0.1655	-0.1655	TN	0.0474	YES
#	776	CCC(=C(CC)c1ccc(O)cc1)c1ccc(O)cc1	14.8985	1	0.5738	0.4262	TP	0.0142	YES
+	2750	CCOC(=O)c1c(C(C#N)C=N)c2ccc(Cl)c(Cl)c2n1C	7.35619	0	0.2791	-0.2791	TN	0.0313	YES
*	778	CCC1OC(=O)C(C)C(OC2CC(C)(OC)C(O)C(C)O2)C(C)C(OC2OC(C)CC(N(C)C)C2O)C(C)(O)CC(C)CN(C)C(C)C(O)C1(C)O	22.0975	1	0.8552	0.1448	TP	0.0604	YES
-	70	CCCCNc1cc(C(=O)O)cc(S(N)(=O)=O)c1Oc1ccccc1	9.60085	0	0.3668	-0.3668	TN	0.0297	YES
+	784	CC(=O)Oc1ccccc1C(=O)Nc1ncc([N+](=O)[O-])s1	13.3822	1	0.5146	0.4854	TP	0.0238	YES
*	946	Cc1ccc(N=CN(C)C=Nc2ccc(C)cc2C)c(C)c1	3.90367	0	0.1442	-0.1442	TN	1.0249	No
*	785	Cc1c(O)cccc1C(=O)NC(CSc1ccccc1)C(O)CN1CC2CCCCC2CC1C(=O)NC(C)(C)C	20.0042	1	0.7734	0.2266	TP	0.0401	YES
#	580	COc1ccccc1OCC(O)COC(N)=O	6.07824	0	0.2291	-0.2291	TN	0.0146	YES
+	836	C=CC1CN2CCC1CC2C(O)c1ccnc2ccc(OC)cc12	11.1425	1	0.427	0.573	FN	0.0239	YES
-	2388	CC1(O)CC(c2nc(-c3ccc4ccc(-c5ccccc5)nc4c3)c3c(N)nccn23)C1	17.6412	0	0.681	-0.681	FP	0.0633	YES
+	858	Cc1ccc(-c2cc(C(F)(F)F)nn2-c2ccc(S(N)(=O)=O)cc2)cc1	13.0058	1	0.4999	0.5001	FN	2.0496	No
-	3771	Cc1cc(C)cc(Oc2ccc(CNC(=O)C(C)N)cc2C)c1	5.00412	0	0.1872	-0.1872	TN	0.0203	YES
-	966	CCCCC(CC)CN1CN(CC(CC)CCCC)CC(C)(N)C1	22.8589	1	0.8849	0.1151	TP	0.0198	YES
#	834	CCCCCCc1ccc(O)cc1O	5.06196	0	0.1894	-0.1894	TN	0.0108	YES
*	994	N#Cc1ccc2c(c1)N(CCCN1CCC(O)CC1)c1ccccc1S2	31.544	1	1.2243	-0.2243	TP	0.0354	YES
*	3775	COC(=O)N(CC(=O)O)Cc1cccc(OCc2nc(-c3ccc(Cl)cc3)oc2C)c1	-3.29516	0	-0.1372	0.1372	TN	1.0402	No
-	1037	C=C1CCC2C(C)(CO)C(O)CCC2(C)C1CC=C1C(=O)OCC1O	19.178	1	0.7411	0.2589	TP	0.0288	YES
+	708	COC1(CS(=O)c2ccccc2)CCN(CCc2c[nH]c3ccc(F)cc23)CC1	19.3057	0	0.7461	-0.7461	FP	0.0391	YES
+	1052	O=C(NC(=O)c1c(F)cccc1F)Nc1cc(Cl)c(OC(F)(F)C(F)C(F)(F)F)cc1Cl	10.7104	1	0.4102	0.5898	FN	2.0636	No
-	2982	O=C(CCCCCCC(=O)Nc1ccc(C2OC(CSc3nc(-c4ccccc4)c(-c4ccccc4)o3)CC(c3ccc(CO)cc3)O2)cc1)NO	5.15141	0	0.1929	-0.1929	TN	3.0784	No
-	1075	Clc1ccc2c(c1)CCc1cccnc1C2=C1CCNCC1	17.2992	1	0.6676	0.3324	TP	0.0286	YES
*	1521	CN1CCN(c2cc3c(cc2F)c(=O)c(C(=O)O)cn3-c2ccc(F)cc2)CC1	12.0286	0	0.4617	-0.4617	TN	0.0444	YES
*	1080	O=C1Nc2ccc(Cl)cc2C(C#CC2CC2)(C(F)(F)F)O1	22.3894	1	0.8666	0.1334	TP	0.0491	YES
*	3680	CC(C)(CO)n1cc(C(=O)c2cncc(NC(=O)Cc3ccc(Cl)cn3)c2)c2cnc(N)nc21	3.21251	0	0.1172	-0.1172	TN	0.0438	YES
*	1133	Cc1ccc(NC(=O)c2ccc(CN3CCN(C)CC3)cc2)cc1Nc1nccc(-c2cccnc2)n1	24.0869	1	0.9329	0.0671	TP	0.0403	YES
-	3880	CC(C)=CCCC(C)=CCCC(C)=CC=CC(C)=CC(=O)O	-6.61073	0	-0.2667	0.2667	TN	0.0164	YES
*	1144	CC(C)=CCOc1ccc(C=CC(=O)c2ccc(OCC=C(C)C)cc2OCC(=O)O)cc1	7.49806	1	0.2846	0.7154	FN	0.0315	YES
+	3895	S=C(NCCc1ccccn1)Nc1ccc(Br)cn1	13.4863	0	0.5186	-0.5186	FP	1.0213	No
*	1158	O=C1CCc2ccc(OCCCCN3CCN(c4cccc(Cl)c4Cl)CC3)cc2N1	22.6971	1	0.8786	0.1214	TP	0.0492	YES
+	1853	CC(=O)CC(c1ccc([N+](=O)[O-])cc1)c1c(O)c2ccccc2oc1=O	11.7099	0	0.4492	-0.4492	TN	1.032	No
*	1163	Cc1ccc(O)c(C(CCN(C(C)C)C(C)C)c2ccccc2)c1	14.8427	1	0.5716	0.4284	TP	0.0179	YES
-	3731	COc1ccc(C2C3=C(CC(c4cccc5ccccc45)CC3=O)OC(=N)C2C#N)cc1	9.59569	0	0.3666	-0.3666	TN	5.0493	No
-	1167	CC1(CN2CCC(n3c(=O)[nH]c4ccccc43)CC2)OCc2ccccc2-n2cccc21	24.8052	1	0.961	0.039	TP	2.0492	No
#	289	CCCCNC(=O)NS(=O)(=O)c1ccc(C)cc1	-0.69232	0	-0.0354	0.0354	TN	0.0231	YES
#	1169	O=C(C=Cc1ccccc1)NC(NC(=S)Nc1cccc2cccnc12)C(Cl)(Cl)Cl	23.6574	1	0.9161	0.0839	TP	0.0427	YES
+	91	Clc1ccc(C(c2ccc(Cl)cc2)[n+]2ccn(CC(OCc3ccc(Cl)cc3Cl)c3ccc(Cl)cc3Cl)c2)cc1	4.1983	0	0.1557	-0.1557	TN	0.0578	YES
#	1172	COc1cc2c(Nc3ccc(NC(=O)c4ccccc4)cc3)ncnc2cc1OCCCN1CCOCC1	15.3599	1	0.5919	0.4081	TP	0.0459	YES
-	1142	O=C(Oc1cccc2cccnc12)c1ccccc1	13.0499	0	0.5016	-0.5016	FP	0.0184	YES
-	1239	O=[N+]([O-])c1ccc(O)c2ncccc12	9.25708	1	0.3534	0.6466	FN	0.0157	YES
-	1824	CC(C)(C)NCC(O)COc1cccc2c1CCC(=O)N2	14.5409	0	0.5599	-0.5599	FP	0.0243	YES
#	1254	COc1ccc2cc1Oc1ccc(cc1)CC1c3c(cc4c(c3Oc3cc5c(cc3OC)CCN(C)C5C2)OCO4)CCN1C	14.5912	1	0.5618	0.4382	TP	0.0939	YES
#	1755	CCC(CO)NCCNC(CC)CO	5.34842	0	0.2006	-0.2006	TN	0.0102	YES
-	1260	CCCCC(C=O)NC(=O)C(CC(C)C)NC(=O)C(CC(C)C)NC(C)=O	13.1983	1	0.5074	0.4926	TP	0.0185	YES
-	28	CC(C)(C)NCC(O)c1ccc(O)c(CO)n1	10.3271	0	0.3952	-0.3952	TN	0.019	YES
*	1264	O=S(=O)(NCCNCC=Cc1ccc(Br)cc1)c1cccc2cnccc12	28.4896	1	1.1049	-0.1049	TP	0.0321	YES
+	3458	CS(=O)(=O)c1ccc(-c2nnc(C=Cc3nnc(-c4ccc(C#N)cc4)o3)n2-c2ccccc2Cl)nc1	-6.43549	0	-0.2599	0.2599	TN	5.0695	No
*	1272	COCCOC(=O)C1=C(C)NC(C)=C(C(=O)OCC=Cc2ccccc2)C1c1cccc([N+](=O)[O-])c1	19.5974	1	0.7575	0.2425	TP	0.0399	YES
-	37	CC(=O)c1ccc(S(=O)(=O)NC(=O)NC2CCCCC2)cc1	3.30905	0	0.1209	-0.1209	TN	0.0238	YES
#	1277	CC(C)c1ccc2c(c1)c(SC(C)(C)C)c(CC(C)(C)C(=O)O)n2Cc1ccc(Cl)cc1	23.351	1	0.9041	0.0959	TP	0.0394	YES
+	3027	COCCOc1nc(-c2ccc(Cl)c(Cl)c2)n(-c2ccc(NC(=O)CCl)cc2)n1	8.40044	0	0.3199	-0.3199	TN	1.0395	No
#	1290	CN1CCCCC1CCN1c2ccccc2Sc2ccc(S(C)=O)cc21	21.3634	1	0.8265	0.1735	TP	0.0429	YES
*	997	CC(=O)Nc1c(I)cc(I)c(C(=O)O)c1I	-1.8506	0	-0.0807	0.0807	TN	0.0096	YES
-	1292	CN1CCC(=C2c3ccccc3CCc3sccc32)CC1	24.5762	1	0.952	0.048	TP	2.0299	No
+	676	O=C1CN(N=Cc2ccc(-c3ccc([N+](=O)[O-])cc3)o2)C(=O)N1	5.34709	0	0.2006	-0.2006	TN	3.0369	No
+	1299	CCCCC(C=O)NC(=O)C(CC(C)C)NC(=O)OCc1ccccc1	12.1231	1	0.4654	0.5346	FN	0.0201	YES
#	364	CC(=O)Nc1ccc(O)cc1	0.07532	0	-0.0054	0.0054	TN	0.0073	YES
-	1306	COc1ccc2c(c1)c(C1=C(c3c[nH]c4ccccc34)C(=O)NC1=O)cn2CCCN(C)C	18.0797	1	0.6981	0.3019	TP	0.0465	YES
-	3641	CC(C)c1c(-c2ccccc2)[nH]c2c(C#N)cnn2c1=O	5.88459	0	0.2216	-0.2216	TN	0.038	YES
+	1332	CC(C)(C)CC(C)(C)c1ccc(O)cc1	12.233	1	0.4697	0.5303	FN	0.0185	YES
*	306	COc1cc(Cc2cnc(N)nc2N)cc(OC)c1OC	-0.91636	0	-0.0442	0.0442	TN	0.0232	YES
+	1349	O[n+]1ccccc1SSc1cccc[n+]1O	20.2735	1	0.7839	0.2161	TP	2.0255	No
#	1149	C=CCC1(O)CCC2C3CCC4=CCCCC4C3CCC21C	8.30522	0	0.3162	-0.3162	TN	0.0329	YES
*	1360	COc1ccc(CN2CCN(C(c3ccc(F)cc3)c3ccc(F)cc3)CC2)c(OC)c1OC	30.9143	1	1.1997	-0.1997	TP	0.0481	YES
+	483	CN1C(C(=O)Nc2ccccn2)=C(O)c2sccc2S1(=O)=O	2.49867	0	0.0893	-0.0893	TN	4.0368	No
-	1372	CNCCC(Oc1cccc2ccccc12)c1cccs1	13.6015	1	0.5231	0.4769	TP	1.0221	No
-	2376	CCCCCOc1ccccc1C(=CSC)n1ccnc1	16.6147	0	0.6409	-0.6409	FP	0.0229	YES
+	1381	Cc1cccc(C)c1OCC(=O)NC(Cc1ccccc1)C(O)CC(Cc1ccccc1)NC(=O)C(C(C)C)N1CCCNC1=O	13.9928	1	0.5384	0.4616	TP	0.0446	YES
#	158	NNc1nncc2ccccc12	8.29072	0	0.3156	-0.3156	TN	0.0145	YES
+	1421	CCOC(=O)C(CCc1ccccc1)NC1CCc2ccccc2N(CC(=O)O)C1=O	17.2579	1	0.666	0.334	TP	0.0313	YES
#	376	Cc1ccnc(NS(=O)(=O)c2ccc(N)cc2)n1	-8.98596	0	-0.3595	0.3595	TN	0.0247	YES
*	1425	NC(=O)c1ccc2nc(-c3ccc(Oc4ccc(Cl)cc4)cc3)[nH]c2c1	4.13423	1	0.1532	0.8468	FN	0.0343	YES
+	3668	CC1(c2ncncc2F)NC(=O)c2cc(-c3cn[nH]c3)ccc21	11.2373	0	0.4308	-0.4308	TN	1.032	No
#	1442	COc1cccc2c1CCCC2CCCN1CCN(C2CCCCC2)CC1	21.1845	1	0.8195	0.1805	TP	0.0289	YES
+	2831	C=CC(=O)Nc1cccc(Sc2nc(Nc3ccc(N4CCN(C)CC4)cc3)ncc2Cl)c1	6.61567	0	0.2501	-0.2501	TN	0.0509	YES
*	1445	Fc1ccc(Cl)cc1-c1nc(Nc2ccncc2)c2nccnc2n1	24.7717	1	0.9597	0.0403	TP	2.0264	No
#	2259	Cc1cccc(-c2n[nH]cc2-c2ccc3ncccc3n2)n1	0.51824	0	0.0119	-0.0119	TN	0.0352	YES
*	1446	Cc1[nH]c(C=C2C(=O)Nc3ccc(S(=O)(=O)N(C)c4cccc(Cl)c4)cc32)c(C)c1C(=O)N1CCN(C)CC1	21.6486	1	0.8376	0.1624	TP	0.0576	YES
+	3789	COc1ccc2c(c1)C(c1ccc(F)cc1)=C(CN1CCCC1)CO2	18.7735	0	0.7253	-0.7253	FP	1.0272	No
#	1452	CCOC(=O)C1C(=COCCN)NC(C)=C(C(=O)OC)C1c1ccccc1Cl	17.1757	1	0.6628	0.3372	TP	0.0262	YES
+	2673	CCCCCN(CCCOC)C(=O)C(CCC(=O)O)NC(=O)c1ccc(Cl)c(Cl)c1	9.37297	0	0.3579	-0.3579	TN	0.0237	YES
-	1502	O=[N+]([O-])c1cc(I)c(O)c(I)c1	7.17446	1	0.272	0.728	FN	0.0089	YES
-	1762	CC1CC2C3CC(F)C4=CC(=O)C=CC4(C)C3(Cl)C(O)CC2(C)C1C(=O)COC(=O)C(C)(C)C	14.8044	0	0.5702	-0.5702	FP	1.0515	No
+	1531	CCOC(=O)C1OC1C(=O)NC(CC(C)C)C(=O)NCCC(C)C	4.87591	1	0.1822	0.8178	FN	0.0192	YES
-	1792	CCOC(=O)OC1(C(=O)COC(=O)CC)CCC2C3CCC4=CC(=O)C=CC4(C)C3C(O)CC21C	3.81278	0	0.1406	-0.1406	TN	0.0421	YES
#	1558	C#CC1(O)CCC2C3CCC4=CCCCC4C3C(=C)CC21CC	16.8187	1	0.6489	0.3511	TP	0.0385	YES
#	2645	NC(CCC(=O)NC(CS)C(=O)NCC(=O)O)C(=O)O	-0.57886	0	-0.031	0.031	TN	0.0189	YES
#	1570	C=C1C(=CC=C2CCCC3(C)C2CCC3C(C)C=CC(O)C2CC2)CC(O)CC1O	20.2639	1	0.7835	0.2165	TP	0.0355	YES
*	2178	CC1CC2C(C(O)CC3(C)C2CCC3(O)C(=O)COC(=O)CCC(=O)O)C2(C)C=CC(=O)C=C12	10.5029	0	0.4021	-0.4021	TN	0.0401	YES
+	1585	CNC(=O)c1cc(Oc2ccc(NC(=O)Nc3ccc(Cl)c(C(F)(F)F)c3)cc2)ccn1	14.6993	1	0.566	0.434	TP	0.0487	YES
*	3570	CC(Nc1ncnc2nc[nH]c12)c1cc2ccc(F)cc2nc1-c1ccccn1	11.083	0	0.4247	-0.4247	TN	0.0342	YES
+	1586	COc1cccc(CCc2ccccc2OCC(CN(C)C)OC(=O)CCC(=O)O)c1	16.7012	1	0.6443	0.3557	TP	0.0266	YES
+	74	CC(C)NCC(O)COc1ccc(CCOCC2CC2)cc1	14.8273	0	0.571	-0.571	FP	0.0193	YES
*	1589	COC(=O)C1=C(C)NC(C)=C(C(=O)OC(C)(C)CN(C)CCC(c2ccccc2)c2ccccc2)C1c1cccc([N+](=O)[O-])c1	34.1155	1	1.3248	-0.3248	TP	0.0469	YES
+	2570	COc1cc2c(cc1OC)CN(CCc1ccc(NC(=O)c3cccc4c(=O)c5cccc(OC)c5[nH]c34)cc1)CC2	17.7489	0	0.6852	-0.6852	FP	0.0522	YES
*	1590	COC(=O)C1=C(C)NC(C)=C(C(=O)OCCN2CCN(C(c3ccccc3)c3ccccc3)CC2)C1c1cccc([N+](=O)[O-])c1	34.0978	1	1.3241	-0.3241	TP	0.057	YES
#	3876	Cc1ccc(-c2nc(N)nc3c2nnn3Cc2cccc(COC3CCOC3)n2)o1	6.71234	0	0.2539	-0.2539	TN	0.0466	YES
-	1598	CS(=O)(=O)CCNCc1ccc(-c2ccc3ncnc(Nc4ccc(OCc5cccc(F)c5)c(Cl)c4)c3c2)o1	27.3795	1	1.0616	-0.0616	TP	1.0751	No
-	2555	Cn1cc(-c2ccc3nnc(C(F)(F)c4ccc5ncccc5c4)n3n2)cn1	3.18179	0	0.116	-0.116	TN	3.053	No
+	1638	CCN(CC)CCCN(c1ccccc1)C1Cc2ccccc2C1	18.0753	1	0.698	0.302	TP	0.0235	YES
*	680	C=CCN1CCC23c4c5ccc(O)c4OC2C(=O)CCC3(O)C1C5	13.3496	0	0.5133	-0.5133	FP	0.0462	YES
#	1642	CC(C)c1onc(-c2c(Cl)cccc2Cl)c1COc1ccc(C=Cc2cccc(C(=O)O)c2)c(Cl)c1	26.8154	1	1.0395	-0.0395	TP	0.0495	YES
-	2050	CN1CCN(C2=Nc3ccccc3Cc3ccccc32)CC1	16.966	0	0.6546	-0.6546	FP	1.0337	No
-	1646	COc1cc(C(C)C)c2c(c1)S(=O)(=O)N(COc1cc(=O)n3cccc(OCCN4CCCCC4)c3n1)C2=O	16.5905	1	0.6399	0.3601	TP	0.0626	YES
#	634	CC(C)[N+]1(C)C2CCC1CC(OC(=O)C(CO)c1ccccc1)C2	12.0437	0	0.4623	-0.4623	TN	0.021	YES
#	1647	O=C(c1ccc(Nc2nccc(-c3cc4ccccc4s3)n2)cc1)N1CCC(N2CCCC2)CC1	17.6967	1	0.6832	0.3168	TP	0.0454	YES
*	3546	CSCCNc1nc(SCCC(F)(F)F)nc2c1ncn2C1OC(COP(=O)(O)OP(=O)(O)C(Cl)(Cl)P(=O)(O)O)C(O)C1O	2.13239	0	0.0749	-0.0749	TN	2.0711	No
#	1682	N#CC(c1ccc(Cl)cc1)c1c(Cl)cc(-n2ncc(=O)[nH]c2=O)cc1Cl	23.7054	1	0.918	0.082	TP	0.0372	YES
*	1359	O=S(=O)(O)c1ccc(O)cc1	3.10837	0	0.1131	-0.1131	TN	0.0143	YES
*	1691	CN1CCCC(n2nc(Cc3ccc(Cl)cc3)c3ccccc3c2=O)CC1	16.3625	1	0.631	0.369	TP	0.0406	YES
-	3554	COc1cc(C(=O)N2CCC(O)C(N)C2)cc2nc(-c3cc4ccccc4n3CC3CC3)n(C)c12	7.10084	0	0.2691	-0.2691	TN	1.0577	No
+	1699	Clc1ccc(C(OCCN2CCCCC2)c2ccccc2)cc1	12.8673	1	0.4944	0.5056	FN	0.0254	YES
+	3903	Cc1ccc(Nc2nnc(Cc3ccncc3)c3ccccc23)cc1Br	10.8096	0	0.414	-0.414	TN	0.0411	YES
*	1704	CCN(CC)CCOC(=O)C(Cc1cccc2ccccc12)CC1CCCO1	14.9235	1	0.5748	0.4252	TP	0.0265	YES
*	3011	CC(C(C)N1CC(=O)NC(=O)C1)N1CC(=O)NC(=O)C1	4.48089	0	0.1667	-0.1667	TN	0.0166	YES
#	1726	CN(Cc1cc(Br)cc(Br)c1N)C1CCCCC1	14.6005	1	0.5622	0.4378	TP	0.0198	YES
-	672	CC[N+](CC)(CCNC(=O)C(=O)NCC[N+](CC)(CC)Cc1ccccc1Cl)Cc1ccccc1Cl	8.72026	0	0.3324	-0.3324	TN	0.0441	YES
*	1738	CC(CN(C)C)CN1c2ccccc2Sc2ccccc21	30.1477	1	1.1697	-0.1697	TP	0.0308	YES
#	275	CC(C)COC(=O)OCN1C(=O)CN(CCN2CC(=O)N(COC(=O)OCC(C)C)C(=O)C2)CC1=O	-3.10151	0	-0.1296	0.1296	TN	0.0335	YES
#	1754	CCN(CC)C(C)CN1c2ccccc2Sc2ccccc21	29.5326	1	1.1457	-0.1457	TP	0.0319	YES
#	194	CCOC(=O)Nc1c[n+](N2CCOCC2)no1	-2.6557	0	-0.1122	0.1122	TN	0.0279	YES
#	1798	COc1ccc2c(c1)N(CC(C)CN(C)C)c1ccccc1S2	25.3312	1	0.9815	0.0185	TP	0.0288	YES
#	2851	Cn1cc(/C=C/C(=O)c2cccc(F)c2)cc1/C=C/C(=O)NO	5.72879	0	0.2155	-0.2155	TN	0.0197	YES
+	1800	CN1CCN(C(c2ccccc2)c2ccc(Cl)cc2)CC1	11.3178	1	0.4339	0.5661	FN	0.0187	YES
-	3209	NCCCCN(Cc1nc2ccccc2[nH]1)C1CCCc2cccnc21	10.2418	0	0.3918	-0.3918	TN	0.0251	YES
+	1830	CC1CC2C3CCC4=CC(=O)C=CC4(C)C3(Cl)C(O)CC2(C)C1(OC(=O)c1ccco1)C(=O)CCl	29.9807	1	1.1632	-0.1632	TP	4.0529	No
#	895	N#CC(C(=N)Sc1ccc(N)cc1)c1ccccc1C(F)(F)F	3.77987	0	0.1393	-0.1393	TN	0.0389	YES
-	1846	CN1CCN(CCCN2c3ccccc3Sc3ccc(S(=O)(=O)N(C)C)cc32)CC1	22.3687	1	0.8658	0.1342	TP	0.0406	YES
+	3114	c1ccc(CNCc2ccc(CN3CCCNCCNCCCNCC3)cc2)nc1	10.6569	0	0.4081	-0.4081	TN	0.0409	YES
*	1854	C#CC1(O)CCC2C3CCC4=Cc5oncc5CC4(C)C3CCC21C	23.9187	1	0.9263	0.0737	TP	0.0538	YES
#	3684	O=C(O)CCSCC1OC2OC3C(CSCCC(=O)O)OC(OC4C(CSCCC(=O)O)OC(OC5C(CSCCC(=O)O)OC(OC6C(CSCCC(=O)O)OC(OC7C(CSCCC(=O)O)OC(OC8C(CSCCC(=O)O)OC(OC9C(CSCCC(=O)O)OC(OC1C(O)C2O)C(O)C9O)C(O)C8O)C(O)C7O)C(O)C6O)C(O)C5O)C(O)C4O)C(O)C3O	-12.0043	0	-0.4775	0.4775	TN	0.1448	YES
-	1857	C#CC1(O)CCC2C3CCC4=CCCCC4C3CCC21C	14.4287	1	0.5555	0.4445	TP	0.0371	YES
*	501	COC1CC(OC2C(C)C(=O)OC(C)C(C)C(OC(C)=O)C(C)C(=O)C3(CO3)CC(C)C(OC3OC(C)CC(N(C)C)C3OC(C)=O)C2C)OC(C)C1OC(C)=O	14.6736	0	0.565	-0.565	FP	0.0785	YES
#	1864	CCC1CN2CCC1CC2C(O)c1ccnc2ccc(OC)cc12	12.5144	1	0.4807	0.5193	FN	0.0237	YES
*	1729	CC1(C)SC2C(NC(=O)C(NC(=O)N3CCNC3=O)c3ccccc3)C(=O)N2C1C(=O)O	7.75191	0	0.2945	-0.2945	TN	2.0451	No
#	1898	CN(C)CCC=C1c2ccccc2C(C)(C)c2ccccc21	24.6239	1	0.9539	0.0461	TP	0.0271	YES
-	3221	CN1CC=CCCOc2cccc(c2)-c2ccnc(n2)Nc2cccc(c2)C1	8.21385	0	0.3126	-0.3126	TN	0.0332	YES
-	1904	Cc1cc(O)c2c(c1)OC1(C)CCC3C(C)(C)CCCC34COC2C14	17.26	1	0.6661	0.3339	TP	0.0363	YES
*	2313	COC(=O)C=CC(=O)OC	-4.34105	0	-0.178	0.178	TN	0.006	YES
+	1907	CCCOC(C(=O)OC1CCN(C)CC1)(c1ccccc1)c1ccccc1	21.8174	1	0.8442	0.1558	TP	0.0245	YES
#	3865	CCOP(=O)(OCC)SCC[N+](C)(C)C	2.58785	0	0.0927	-0.0927	TN	0.0227	YES
*	1930	CC(CN(C)C)CN1c2ccccc2Sc2ccc(C(F)(F)F)cc21	31.4515	1	1.2207	-0.2207	TP	0.048	YES
+	928	CC1OC(n2cc(F)c(=O)[nH]c2=O)C(O)C1O	6.75941	0	0.2558	-0.2558	TN	0.0257	YES
*	1983	CC(C(O)c1ccccc1)N(C)CCOC(c1ccccc1)c1ccccc1	29.818	1	1.1569	-0.1569	TP	0.0191	YES
+	3598	CCON=C(C(=O)NC1C(=O)N2C(C(=O)O)=C(Sc3nc(-c4cc[n+](C)cc4)cs3)CSC12)c1nc(=NP(=O)(O)O)s[nH]1	-0.56184	0	-0.0303	0.0303	TN	3.0818	No
*	2007	Cc1c(-c2ccc(O)cc2)n(Cc2ccc(OCCN3CCCCCC3)cc2)c2ccc(O)cc12	10.6231	1	0.4068	0.5932	FN	0.0469	YES
*	929	NC(=O)CCC(N)C(=O)O	0.60849	0	0.0154	-0.0154	TN	0.0056	YES
*	2022	CN(C)CCOC1=Cc2ccccc2Sc2ccc(Cl)cc21	16.3728	1	0.6314	0.3686	TP	0.0372	YES
*	3523	CN1C(=O)C(NC(=O)C(CCC(F)(F)F)C(CCC(F)(F)F)C(N)=O)N=C(c2ccccc2)c2ccccc21	7.33617	0	0.2783	-0.2783	TN	0.0642	YES
-	2024	Cn1nnnc1Sc1ncnc2scc(-c3cccc(S(C)(=O)=O)c3)c12	15.6491	1	0.6032	0.3968	TP	1.0574	No
+	515	CC(CO)NC(=O)C1C=C2c3cccc4[nH]cc(c34)CC2N(C)C1	18.4276	0	0.7117	-0.7117	FP	0.0299	YES
+	2041	CC1CC2C3CCC4=CC(=O)C=CC4(C)C3C(=O)CC2(C)C1(O)C(=O)CO	10.2474	1	0.3921	0.6079	FN	0.0339	YES
*	659	CC(CCC(=O)O)C1CCC2C3C(=O)CC4CC(=O)CCC4(C)C3CC(=O)C12C	1.97726	0	0.0689	-0.0689	TN	0.0348	YES
#	2074	O=C(CCC1CCN(Cc2ccccc2)CC1)c1ccc2c(c1)NCCCC2	25.2931	1	0.98	0.02	TP	0.0285	YES
-	2121	CCCN(CC)C(CC)C(=O)Nc1c(C)cccc1C	10.8611	0	0.4161	-0.4161	TN	0.0152	YES
#	2086	CCCN(CCC)C(=O)C(CCC(=O)OCCCN1CCN(CCOC(=O)Cc2c(C)n(C(=O)c3ccc(Cl)cc3)c3ccc(OC)cc23)CC1)NC(=O)c1ccccc1	30.4395	1	1.1811	-0.1811	TP	0.0682	YES
*	61	CCC1(c2ccc(N)cc2)CCC(=O)NC1=O	6.12078	0	0.2308	-0.2308	TN	0.0217	YES
-	2124	COc1cc(O)c2c(c1)C1OC1CC(O)C(O)C(=O)C=CCC(C)OC2=O	8.1963	1	0.3119	0.6881	FN	0.031	YES
#	3856	Cc1[nH]ncc1-c1cc2[nH]c(C3CC4CCN3CC4)nc(=O)c2s1	-2.92988	0	-0.1229	0.1229	TN	0.0317	YES
*	2127	CN(C)CCCNC(=O)c1ccc(-c2cc(O)c3ncccc3c2)cc1	18.3776	1	0.7098	0.2902	TP	0.0274	YES
#	1869	CCCCCc1ccc(C)cc1O	6.80977	0	0.2577	-0.2577	TN	0.0098	YES
-	2129	COC(=O)C1=C(C)NC(COC(N)=O)=C(C(=O)OC(C)C)C1c1cccc(Cl)c1Cl	14.0611	1	0.5411	0.4589	TP	0.0316	YES
*	2882	COc1ccc(-c2oc3c(CC=C(C)C)c(OC4OC(CO)C(O)C(O)C4O)cc(O)c3c(=O)c2OC2OC(C)C(O)C(O)C2O)cc1	9.42324	0	0.3599	-0.3599	TN	0.0634	YES
#	2134	O=C(CCCN1CCN(c2ccc(F)cc2)CC1)NC1c2ccccc2CSc2ccccc21	28.2496	1	1.0956	-0.0956	TP	0.0471	YES
-	2264	CC(C)(C)OC(=O)CN(Cc1ccc(Cl)cc1)Cc1ccc([N+](=O)[O-])s1	14.4923	0	0.558	-0.558	FP	0.0309	YES
+	2145	CCN1CCN(c2cc(-c3ccc(F)cc3)c3c(n2)CCCCCC3)CC1	24.1063	1	0.9337	0.0663	TP	0.0452	YES
-	781	CCCCC(CC)COC(=O)c1ccc(N(C)C)cc1	9.00094	0	0.3434	-0.3434	TN	0.0136	YES
#	2181	COC1C(OC(C)=O)CC(=O)OC(C)CC=CC=CC(OC2CCC(N(C)C)C(C)O2)C(C)CC(CC=O)C1OC1OC(C)C(OC2CC(C)(O)C(O)C(C)O2)C(N(C)C)C1O	20.9757	1	0.8113	0.1887	TP	0.0646	YES
#	847	O=C(O)CCCCC(=O)O	-1.02082	0	-0.0483	0.0483	TN	0.008	YES
*	2190	CCc1ccc(C=C2SC(=S)NC2=O)cc1	16.382	1	0.6318	0.3682	TP	0.0329	YES
#	1253	CCCCCCCCCCCCCCCC(=O)OCC(O)C1OC(=O)C(O)=C1O	12.1159	0	0.4651	-0.4651	TN	0.0267	YES
-	2210	COc1cc(F)c(F)c(Nc2ccc(I)cc2F)c1NS(=O)(=O)C1(CC(O)CO)CC1	23.1399	1	0.8959	0.1041	TP	1.0467	No
+	3326	Cc1cc(N2CCOCC2)ccc1Nc1nc(NC2CCCCC2)c2[nH]cnc2n1	7.84772	0	0.2983	-0.2983	TN	0.0348	YES
-	2223	COc1cc(C(C)=O)ccc1OCCCN1CCC(c2noc3cc(F)ccc23)CC1	21.5853	1	0.8351	0.1649	TP	1.0404	No
+	3898	Cn1ncc(NC(=O)c2nc(-c3c(F)cccc3F)sc2N)c1N1CCC(N)C(F)CC1	9.33913	0	0.3566	-0.3566	TN	3.0551	No
-	2224	Cc1ccc(Nc2nccc(N(C)c3ccc4c(C)n(C)nc4c3)n2)cc1S(N)(=O)=O	23.2452	1	0.9	0.1	TP	1.0591	No
+	2454	COc1ccc(-n2cnc3cc(C(=O)N4CCCCC4)ccc32)cc1	9.61344	0	0.3673	-0.3673	TN	0.036	YES
*	2236	O=C(Nc1ccc(F)c(C(F)(F)F)c1)Nc1nnc(-c2ccncc2)s1	25.6903	1	0.9956	0.0044	TP	0.0469	YES
#	1055	CCOc1ccc2nc3cc(N)ccc3c(N)c2c1	9.74907	0	0.3726	-0.3726	TN	0.0237	YES
#	2238	COc1cc(C)c(Sc2cnc(NC(=O)c3ccc(CNC(C)C(C)(C)C)cc3)s2)cc1C(=O)N1CCN(C(C)=O)CC1	22.9516	1	0.8885	0.1115	TP	0.0539	YES
-	3480	C=C1CCN(C(C)C(O)(Cn2cncn2)c2ccc(F)cc2F)CC1	10.8523	0	0.4157	-0.4157	TN	0.0398	YES
-	2242	Cn1cc(C2=C(c3cn(C4CCN(Cc5ccccn5)CC4)c4ccccc34)C(=O)NC2=O)c2ccccc21	19.9045	1	0.7695	0.2305	TP	2.0661	No
+	735	O=C(O)CCC=CCCC1C(OCc2ccc(-c3ccccc3)cc2)CC(O)C1N1CCCCC1	10.1563	0	0.3885	-0.3885	TN	1.0409	No
#	2247	Cc1ccc(NC(=O)c2ccc(CN3CCN(C)CC3)cc2)cc1Nc1nc(-c2cccnc2)cs1	27.5421	1	1.0679	-0.0679	TP	0.0412	YES
*	1183	N=C(N)Nc1ccc(C(=O)Oc2ccc3cc(C(=N)N)ccc3c2)cc1	-0.42702	0	-0.0251	0.0251	TN	0.0282	YES
*	2251	OCCC#Cc1nc(-c2ccc(F)cc2)c(-c2ccncc2)n1CCCc1ccccc1	25.1494	1	0.9744	0.0256	TP	0.0431	YES
#	999	COc1ccc(C(CN(C)C)C2(O)CCCCC2)cc1	9.98127	0	0.3817	-0.3817	TN	0.0186	YES
#	2270	CCN(CC)CCOc1ccc(Nc2ncc3cc(-c4c(Cl)cccc4Cl)c(=O)n(C)c3n2)cc1	26.3526	1	1.0214	-0.0214	TP	0.0621	YES
#	2548	CC(C)CC(C(=O)NC(C(=O)OC1CCCC1)c1ccccc1)C(O)C(=O)NO	14.1851	0	0.5459	-0.5459	FP	0.0233	YES
#	2273	CC(C)(C)c1cc(NC(=O)Nc2ccc(-c3cn4c(n3)sc3cc(OCCN5CCOCC5)ccc34)cc2)no1	27.4448	1	1.0641	-0.0641	TP	0.1016	YES
-	845	O=C1c2c(O)cccc2Cc2cccc(O)c21	10.6874	0	0.4093	-0.4093	TN	0.0193	YES
*	2279	CC(=O)OCC(=O)C1(O)C(C)CC2C3C=C(C)C4=Cc5c(cnn5-c5ccccc5)CC4(C)C3C(O)CC21C	16.9986	1	0.6559	0.3441	TP	1.0605	No
#	1129	CCOc1ccc(C(=O)OCCN(CC)CC)cc1	11.3653	0	0.4358	-0.4358	TN	0.0164	YES
+	2289	CCOC(=O)c1c(CSc2ccccc2)n(C)c2cc(Br)c(O)c(CN(C)C)c12	21.5579	1	0.8341	0.1659	TP	0.0389	YES
-	3521	CN(CCO)C1CCN(c2ccc(Nc3ncc4c5ccnc(F)c5n(C5CCCC5)c4n3)nc2)CC1	8.01264	0	0.3047	-0.3047	TN	3.0938	No
#	2298	COc1ccc2cc1Oc1ccc(cc1)CC1c3cc(c(OC)cc3CCN1C)Oc1c(O)c(OC)cc3c1C(C2)N(C)CC3	24.4299	1	0.9463	0.0537	TP	0.0568	YES
+	3101	Clc1ccc(CCCOCCCN2CCCCC2)cc1	9.7041	0	0.3708	-0.3708	TN	0.0237	YES
-	2300	CC(=O)ON=C1C(=O)N(Cc2cc(Cl)ccc2Cl)c2ccc(Cl)cc21	15.1543	1	0.5838	0.4162	TP	1.0341	No
-	3358	O=C(NC1CCCC(CO)C1)C1CCN(c2nc3cc(Cl)c(-c4ccc(Cl)cc4)cc3o2)CC1	6.80608	0	0.2576	-0.2576	TN	1.045	No
+	2304	COc1c(C)cnc(Cn2cnc3c(Cl)nc(N)nc32)c1C	14.3952	1	0.5542	0.4458	TP	1.0368	No
-	463	CC(C)(Sc1cc(C(C)(C)C)c(O)c(C(C)(C)C)c1)Sc1cc(C(C)(C)C)c(O)c(C(C)(C)C)c1	9.07523	0	0.3463	-0.3463	TN	0.0494	YES
*	2305	CCNC(=O)c1noc(-c2cc(C(C)C)c(O)cc2O)c1-c1ccc(CN2CCOCC2)cc1	15.0619	1	0.5802	0.4198	TP	0.0408	YES
+	2769	CC=C(C)C(=O)OC1C(C)=CC23C(=O)C(C=C(CO)C(O)C12O)C1C(CC3C)C1(C)C	3.17384	0	0.1156	-0.1156	TN	1.0358	No
*	2307	O=C(NC(c1ccccc1)C1CCCCN1)c1cccc(C(F)(F)F)c1Cl	21.6093	1	0.8361	0.1639	TP	1.0366	No
*	673	CC(C)CC1C(=O)N2CCCC2C2(O)OC(NC(=O)C3C=C4c5cccc6[nH]c(Br)c(c56)CC4N(C)C3)(C(C)C)C(=O)N12	-4.38607	0	-0.1798	0.1798	TN	5.0583	No
*	2321	Cc1ccc(C(=O)Nc2cccc(C(F)(F)F)c2)cc1Nc1nc(-c2cccnc2)nc2c1cnn2C	16.3479	1	0.6305	0.3695	TP	0.0565	YES
+	1541	Clc1ccc(C(Cn2ccnc2)OCc2ccsc2Cl)c(Cl)c1	8.49608	0	0.3236	-0.3236	TN	3.0378	No
+	2326	O=C(Nc1ccc(S(=O)(=O)N2CCOCC2)cc1)c1cc(Cl)ccc1NS(=O)(=O)c1ccc(Cl)s1	20.8515	1	0.8065	0.1935	TP	2.0493	No
+	2980	COc1cc(CC(CO)C(CO)Cc2ccc(O)c(OC)c2)ccc1O	8.64337	0	0.3294	-0.3294	TN	0.0217	YES
+	2338	CN(C)CCOC(c1ccccc1)c1ccc(Br)cc1	22.0953	1	0.8551	0.1449	TP	0.0152	YES
*	3926	CCC(=O)OC1(C(=O)COC(C)=O)CCC2C3CCC4=CC(=O)CCC4(C)C3C(O)CC21C	3.92811	0	0.1451	-0.1451	TN	0.04	YES
-	2361	CN(C)CCCOC1(Cc2ccccc2)CCCCCC1	10.519	1	0.4027	0.5973	FN	0.0233	YES
+	3402	O=C(OC1OC2COC(=O)c3cc(O)c(O)c(O)c3-c3c(cc(O)c(O)c3O)C(=O)OC(C2O)C1O)c1cc(O)c(O)c(O)c1	12.5865	0	0.4835	-0.4835	TN	1.0748	No
+	2392	CN1CCN(c2cc(C(=O)Nc3ccc4c(c3)-c3c(c(C(N)=O)nn3-c3ccc(F)cc3)CC4)c(Cl)cn2)CC1	29.6012	1	1.1484	-0.1484	TP	1.0754	No
-	3936	Cn1cc(OCC(O)CNC(C)(C)C)c2ccccc2c1=O	8.69724	0	0.3315	-0.3315	TN	0.0303	YES
#	2394	Cc1c(CCOc2ccc(C(=O)O)cc2)c2cc(Cl)ccc2n1C(c1ccccc1)c1ccccc1	26.8485	1	1.0408	-0.0408	TP	0.0325	YES
+	2416	NC(=O)NC1N=C(O[Al](O)O)NC1=O	-8.12841	0	-0.326	0.326	TN	2.018	No
*	2401	Cc1ccc(F)c(NC(=O)Nc2ccc(-c3cccc4n[nH]c(N)c34)cc2)c1	22.0745	1	0.8543	0.1457	TP	0.0438	YES
-	1897	O=C(OCCN1CCCCC1)C(O)(c1ccccc1)c1ccccc1	16.7914	0	0.6478	-0.6478	FP	0.0217	YES
-	2403	Cn1c(Nc2ccc(C(F)(F)F)cc2)nc2cc(Oc3ccnc(-c4ncc(C(F)(F)F)[nH]4)c3)ccc21	21.06	1	0.8146	0.1854	TP	0.0838	YES
-	757	O=C(O)c1ccccc1-c1ccc(C=c2sc3nc4cc(Br)cnc4n3c2=O)o1	6.78916	0	0.2569	-0.2569	TN	2.0551	No
-	2405	O=C(O)c1ccc(-c2c[nH]c3ncc(-c4ccccc4)cc23)cc1C1CCCC1	19.3942	1	0.7495	0.2505	TP	0.0418	YES
+	1064	O=C(CCc1ccc(O)cc1)c1c(O)cc(O)cc1OC1OC(CO)C(O)C(O)C1O	10.3769	0	0.3971	-0.3971	TN	0.0244	YES
#	2415	CC1CCCCN1CCCOC(=O)c1ccc(OC2CCCCC2)cc1	12.4267	1	0.4772	0.5228	FN	0.0262	YES
+	2448	NCCS[As](SCCN)c1ccc(Nc2nc(N)nc(N)n2)cc1	4.5999	0	0.1714	-0.1714	TN	1.0321	No
*	2436	CN(C)C(CCOc1cccc2ccccc12)c1ccccc1	22.4406	1	0.8686	0.1314	TP	0.0208	YES
-	5	OCC(S)CS	3.43371	0	0.1258	-0.1258	TN	0.0124	YES
+	2441	Cc1cccc(Nc2nc(NC3CCCCC3N)ncc2C(N)=O)c1	15.8025	1	0.6092	0.3908	TP	0.0342	YES
*	2537	Cc1cc2c(F)c(Oc3ncnn4cc(OCC(C)O)c(C)c34)ccc2[nH]1	10.5587	0	0.4042	-0.4042	TN	0.0426	YES
+	2475	CCC(CN)=C(c1ccccc1)c1ccccc1	21.8	1	0.8435	0.1565	TP	0.0138	YES
#	1619	CC(Cn1cnc2c(N)ncnc21)OCP(=O)(O)O	-1.77427	0	-0.0777	0.0777	TN	0.0229	YES
-	2483	Cc1nn(Cc2ccccc2Cl)c(C)c1CN(C)CC(O)COc1ccc(Cl)cc1	20.7172	1	0.8012	0.1988	TP	0.0373	YES
-	387	COc1c2occc2cc2ccc(=O)oc12	3.99014	0	0.1475	-0.1475	TN	2.0257	No
+	2485	COc1cc2nc(-c3ccc(N4CCN(C)CC4)cc3)nc(NCCN3CCOCC3)c2cc1OC	13.399	1	0.5152	0.4848	TP	0.0493	YES
+	1977	CON=C(C(=O)NC1C(=O)N2C(C(=O)OCOC(=O)C(C)(C)C)=C(C)CSC12)c1csc(N)n1	-4.28307	0	-0.1758	0.1758	TN	1.0556	No
*	2495	Cc1cccc(C=NNc2cc(N3CCOCC3)nc(OCCc3ccccn3)n2)c1	18.9071	1	0.7305	0.2695	TP	0.0439	YES
+	3403	CC(C)CN(CC(O)C(Cc1ccccc1)NC(=O)OC1COC2OCCC12)S(=O)(=O)c1ccc(N)cc1	9.01603	0	0.3439	-0.3439	TN	1.0463	No
*	2496	Cc1csc(-c2nnc(Nc3ccc(Oc4ncccc4-c4ccnc(N)n4)cc3)c3ccccc23)c1	12.9614	1	0.4981	0.5019	FN	1.0697	No
#	1613	Cc1c(F)c(N2CCNC(C)C2)cc2c1c(=O)c(C(=O)O)cn2C1CC1	6.11374	0	0.2305	-0.2305	TN	0.0375	YES
+	2508	CCCCCCCc1ccc(CCc2cccc(O)c2C(=O)O)cc1	9.80102	1	0.3746	0.6254	FN	0.0219	YES
*	3717	CC(C)n1cc(-c2ccc3c(c2)N(C)CC3)c2c(NS(=O)(=O)c3ccn(C)n3)ccnc21	16.0305	0	0.6181	-0.6181	FP	0.0572	YES
*	2515	CCN(CC)CCCCNc1nc2cc(Cl)c(Cl)cc2nc1-c1ccc(-c2cccs2)s1	19.9913	1	0.7728	0.2272	TP	1.0435	No
+	909	Nc1ncnc2nc(-c3ccc(N4CCOCC4)nc3)cc(-c3cccc(Br)c3)c12	12.8293	0	0.493	-0.493	TN	0.0545	YES
-	2525	O=C(O)C(=O)c1cn(Cc2ccccc2)c2ccc(-c3ccc(OC(F)(F)F)cc3)cc12	14.8888	1	0.5734	0.4266	TP	0.0549	YES
-	3661	Cn1c(-c2ccccc2C(F)(F)F)nnc1C12CCC(c3noc(C4CC(F)(F)C4)n3)(CC1)CC2	15.5145	0	0.5979	-0.5979	FP	1.0787	No
+	2531	Nc1nc(Nc2ccc(S(N)(=O)=O)cc2)nn1C(=O)c1c(F)cccc1F	20.0264	1	0.7742	0.2258	TP	0.0435	YES
-	562	CCOC(=O)C1=CC2(CC)CCCN3CCc4c(n1c1ccccc41)C32	9.06966	0	0.346	-0.346	TN	0.0409	YES
+	2535	S=C(NCc1ccc2c(c1)OCO2)N1CCN(c2ncnc3c2oc2ccccc23)CC1	17.8798	1	0.6903	0.3097	TP	1.0499	No
+	1312	CC(C(O)CCC(C)(C)O)C1CCC2(O)C3=CC(=O)C4CC(O)C(O)CC4(C)C3CCC12C	-3.05075	0	-0.1276	0.1276	TN	3.0406	No
*	2545	c1ccc2c(CCNc3ccc(Nc4ccncc4)cc3)c[nH]c2c1	29.1504	1	1.1308	-0.1308	TP	1.0314	No
#	3142	CCCC(CCC)C(=O)Nc1ccn(C2OC(CO)C(O)C2(F)F)c(=O)n1	3.1921	0	0.1164	-0.1164	TN	0.0398	YES
#	2565	COc1ccc(C2CC(c3ccccc3)=NN2c2ccc(S(N)(=O)=O)cc2)cc1	22.5312	1	0.8721	0.1279	TP	0.0417	YES
+	2796	CN(C)CC(c1ccc(O)cc1)C1(O)CCCCC1	17.371	0	0.6704	-0.6704	FP	0.0157	YES
-	2568	Cc1c(C(=O)Nc2cccc(C(F)(F)F)c2)cc(-c2ccccc2)n1CCCN1CCOCC1	15.075	1	0.5807	0.4193	TP	0.0518	YES
+	1418	c1cc(CN2CCCNCCNCCCNCC2)ccc1CN1CCCNCCNCCCNCC1	6.172	0	0.2328	-0.2328	TN	0.0422	YES
#	2573	CCOC(CN1C(=O)C(CC(=O)Nc2ccc(C)cc2)(NC(=O)Nc2ccc(C)cc2)c2ccccc21)OCC	32.202	1	1.25	-0.25	TP	0.0377	YES
+	3787	CCC(C)CNCC(=O)N1CCc2sccc2C1c1cccc(C)n1	9.52083	0	0.3637	-0.3637	TN	1.0339	No
+	2578	CN(C)c1ccc(C2Nc3ccc4ccccc4c3C3=C2C(=O)CC(C)(C)C3)cc1Br	21.4883	1	0.8313	0.1687	TP	5.0495	No
-	2079	CCCCCC1Nc2cc(C(F)(F)F)c(S(N)(=O)=O)cc2S(=O)(=O)N1	17.743	0	0.685	-0.685	FP	0.0543	YES
-	2600	CN1CC2c3ccccc3Oc3ccc(Cl)cc3C2C1	16.9834	1	0.6553	0.3447	TP	0.034	YES
*	124	CC(C)c1cccc(C(C)C)c1O	9.36528	0	0.3576	-0.3576	TN	0.0088	YES
-	2621	CCCCCCCCCCCCCCCc1cccc(O)c1C(=O)O	9.09537	1	0.347	0.653	FN	0.0225	YES
-	3938	O=C(OCCN(CCO)CCO)c1ccccc1O	11.1531	0	0.4275	-0.4275	TN	0.0156	YES
-	2651	CN1CCCC(CC2c3ccccc3Sc3ccccc32)C1	23.2113	1	0.8987	0.1013	TP	0.0279	YES
-	1579	CCOc1nc2cccc(C(=O)O)c2n1Cc1ccc(-c2ccccc2-c2nn[nH]n2)cc1	7.72226	0	0.2934	-0.2934	TN	0.0461	YES
#	2691	Cc1cnc(NC(=O)Nc2cc(Br)c(C)cc2OCC2CNCCO2)cn1	12.2209	1	0.4692	0.5308	FN	0.0343	YES
*	1271	CN(C)C1C(=O)C(C(N)=O)C(=O)C2(O)C(O)=C3C(=O)c4c(O)ccc(Cl)c4C(O)C3CC12	-4.98528	0	-0.2032	0.2032	TN	0.0417	YES
-	2693	c1ccc2c(Oc3nc(Nc4ccc(N5CCOCC5)cc4)c4ncn(C5CCCCC5)c4n3)cccc2c1	23.862	1	0.9241	0.0759	TP	2.1259	No
+	2925	COc1cc(F)c(C(C)C)cc1-c1ccc(C(F)(F)F)cc1CN1C(=O)OC(c2cc(C(F)(F)F)cc(C(F)(F)F)c2)C1C	18.1416	0	0.7006	-0.7006	FP	0.0831	YES
*	2701	COc1cccc(C(C)NCCCc2ccccc2Cl)c1	21.2688	1	0.8228	0.1772	TP	0.0234	YES
*	426	Nc1nc(=O)[nH]cc1F	-3.28849	0	-0.1369	0.1369	TN	0.0142	YES
-	2745	CC(C)C1C(=O)NC(CO)Cc2c[nH]c3cccc(c23)N1C	2.59989	1	0.0932	0.9068	FN	0.0229	YES
#	1628	CC1CCCCN1CCCOC(=O)c1ccccc1	8.67352	0	0.3306	-0.3306	TN	0.0154	YES
*	2758	CN1CCC(COc2cnc(-c3cccc(Cn4nc(-c5cccc(C#N)c5)ccc4=O)c3)nc2)CC1	20.7042	1	0.8007	0.1993	TP	0.0714	YES
-	3115	Cc1cccc(C(C)c2cnc[nH]2)c1C	3.62934	0	0.1334	-0.1334	TN	0.0121	YES
-	2764	CC(C)CC(NC(=O)C(Cc1ccccc1)NC(=O)OCc1ccccc1)C(=O)C=O	15.1667	1	0.5843	0.4157	TP	0.0246	YES
*	813	O=C(O)C(Cl)(Cl)Cl	-5.70332	0	-0.2313	0.2313	TN	0.0114	YES
+	2765	O=C(NCc1ccccc1)C(Cc1ccccc1)NC(=O)C1OC1C(=O)NCCc1ccc(O)cc1	14.5646	1	0.5608	0.4392	TP	0.0337	YES
*	1859	CC(=O)OCC(=O)C1(O)CCC2C3CCC4=CC(=O)C=CC4(C)C3(F)C(O)CC21C	14.628	0	0.5633	-0.5633	FP	0.0424	YES
-	2770	COc1ccc(-c2oc3c(CC=C(C)C)c(O)cc(O)c3c(=O)c2O)cc1	17.8549	1	0.6894	0.3106	TP	0.0391	YES
+	3825	O=C1OC(COc2ccccc2[N+](=O)[O-])CC1Cc1ccccc1	18.1873	0	0.7023	-0.7023	FP	0.0231	YES
+	2775	CC(C)(N)c1ccc(-c2nc3ccccc3nc2-c2ccccc2)cc1	19.0276	1	0.7352	0.2648	TP	0.0362	YES
-	2384	COC(=O)c1cc(Cl)ccc1NS(=O)(=O)C(F)(F)F	1.62143	0	0.055	-0.055	TN	1.0335	No
#	2782	CCc1nc(-c2cccc(C)c2)c(-c2ccnc(NC(=O)c3ccccc3)c2)s1	25.8038	1	1	0	TP	0.0386	YES
#	2308	Cc1c(C(=O)O)c(O)cc2c1C(=O)c1c(O)c(C3OC(CO)C(O)C(O)C3O)c(O)c(O)c1C2=O	6.13954	0	0.2315	-0.2315	TN	0.0535	YES
+	2783	O=C1NC(=O)C(=Cc2cccc(C(F)(F)F)c2)S1	16.2902	1	0.6282	0.3718	TP	2.0332	No
#	3248	CCCC1(CCc2ccccc2)CC(=O)C(C(CC)c2cccc(NS(=O)(=O)c3ccc(C(F)(F)F)cn3)c2)C(=O)O1	17.0194	0	0.6567	-0.6567	FP	0.0669	YES
#	2789	COc1ccc2c(Oc3ccc(NC(=O)c4c(C)n(CC(C)(C)O)n(-c5ccccc5)c4=O)cc3F)ccnc2c1	23.342	1	0.9038	0.0962	TP	0.0832	YES
#	1599	CC[N+]1(CCOC(=O)C(O)(c2ccccc2)c2ccccc2)CCCCC1	8.43502	0	0.3212	-0.3212	TN	0.0241	YES
+	2790	CN(C)CC(=O)N1CCC(c2ccc(NC(=O)c3ncc(C#N)[nH]3)c(C3=CCCCC3)c2)CC1	25.3644	1	0.9828	0.0172	TP	3.0459	No
+	782	CC12C=CC(=O)C=C1CCC1C2C(=O)CC2(C)C1CCC2(O)C(=O)CO	5.39484	0	0.2024	-0.2024	TN	0.0285	YES
-	2803	NC(=O)c1cccc2cn(-c3ccc(C4CCCNC4)cc3)nc12	15.127	1	0.5828	0.4172	TP	0.0403	YES
*	204	CC(N)(Cc1ccc(O)cc1)C(=O)O	6.35415	0	0.2399	-0.2399	TN	0.0134	YES
-	2822	CC(NC(=O)C(=O)Nc1ccccc1C(C)(C)C)C(=O)NC(CC(=O)O)C(=O)COc1c(F)c(F)cc(F)c1F	24.217	1	0.938	0.062	TP	0.0519	YES
-	3529	CNC(C)C(=O)NC1C(=O)N(Cc2c(C)ccc3ccccc23)c2ccc(C#N)cc2N(C(C)=O)C1C	15.375	0	0.5924	-0.5924	FP	0.0464	YES
#	2825	Cc1c(NC(=O)OCC2COCCN2)cn2ncnc(Nc3ccc4c(cnn4Cc4cccc(F)c4)c3)c12	20.8877	1	0.8079	0.1921	TP	0.0692	YES
*	713	Cc1nc(=O)c2cccc(O)c2[nH]1	-2.57387	0	-0.109	0.109	TN	0.0117	YES
+	2842	Cc1ccc(NC(=O)c2ccc(CN3CCC(N(C)C)C3)c(C(F)(F)F)c2)cc1Nc1ncc(-c2cncnc2)cn1	26.8216	1	1.0398	-0.0398	TP	0.0557	YES
-	739	CNCCC(Oc1ccccc1C)c1ccccc1	11.4512	0	0.4391	-0.4391	TN	0.0167	YES
-	2849	CCC1C=CC=CCC(C)C(O)C(C)(O)C(=O)C(C)C(O)C(C)C(=O)C(C)C(O)C(C)C=CC(=O)OC2C(C)C(CC1)OC1(CCC(C)C(CC(C)O)O1)C2C	22.3086	1	0.8634	0.1366	TP	0.0589	YES
+	2847	Cc1nc(C(=O)NCC(=O)O)c(O)c2ccc(Oc3ccccc3)cc12	5.95578	0	0.2244	-0.2244	TN	0.0313	YES
+	2853	CC(C)(C)Cn1c(N)nc2ccc(-c3nc(C(C)(C)C)[nH]c3-c3ccc(F)cc3)nc21	16.3772	1	0.6316	0.3684	TP	1.0624	No
#	30	O=C(O)C(Cc1c[nH]c2ccccc12)N1C(=O)c2ccccc2C1=O	2.80032	0	0.101	-0.101	TN	0.0311	YES
*	2856	COc1cc(Nc2nc3ccccc3nc2NS(=O)(=O)c2ccc(NC(=O)c3ccc(C)c(OC)c3)cc2)cc(OC)c1	26.265	1	1.018	-0.018	TP	0.0586	YES
+	3118	COC(=O)C1(c2ccc(C)cc2)CC1CN1CCC(O)(c2ccccc2)CC1	9.46926	0	0.3617	-0.3617	TN	0.0249	YES
*	2857	CNC(=O)c1ccc2c(c1)NC(=O)/C2=C(/Nc1cccc(CN(C)C)c1)c1ccccc1	26.6266	1	1.0321	-0.0321	TP	0.0246	YES
*	1328	O=[N+]([O-])C(Br)(CO)CO	5.02733	0	0.1881	-0.1881	TN	0.0099	YES
+	2861	CCCCCCCCCCCCc1ccc(S(=O)(=O)Nc2nncs2)cc1	17.2273	1	0.6648	0.3352	TP	1.0373	No
*	93	C[N+](C)(C)CCOC(N)=O	2.48947	0	0.0889	-0.0889	TN	0.0134	YES
#	2884	C=C1C(=O)C23C(O)C1CCC2C12COC3(O)C(O)C1C(C)(C)CCC2O	14.1564	1	0.5448	0.4552	TP	0.0428	YES
+	3545	Cc1c(-c2ccc(-c3ccccc3F)cc2)nc2ccc(F)cc2c1C(=O)O	11.9418	0	0.4583	-0.4583	TN	0.0477	YES
#	2888	CNC(C)C1C(O)CC2(C)C3CCC4C(C)(C)C(NC)CCC45CC35CCC12C	10.7163	1	0.4104	0.5896	FN	0.0536	YES
-	521	COc1ccc2c(c1OC)C(=O)OC2C1c2cc3c(cc2CCN1C)OCO3	11.8416	0	0.4544	-0.4544	TN	0.0418	YES
-	2899	O=C1NC(=O)/C(=C/c2ccc(-c3ccc(F)cc3)o2)S1	26.183	1	1.0148	-0.0148	TP	5.0323	No
#	3324	CN(C)C(=O)c1cc2cnc(Nc3ccc(N4CCNCC4)cn3)nc2n1C1CCCC1	7.83613	0	0.2978	-0.2978	TN	0.0398	YES
+	2903	Cn1cc(-c2ccncc2)c(-c2ccc(OCc3ccc4ccccc4n3)cc2)n1	6.29751	1	0.2377	0.7623	FN	1.0448	No
+	2966	Cc1cncc2cccc(S(=O)(=O)N3CCCN(C(=O)CN)CC3C)c12	12.3778	0	0.4753	-0.4753	TN	0.03	YES
+	2943	COc1cc(NC(=O)c2ccc(-c3ccc(Cl)cc3)o2)cc(OC)c1	16.8787	1	0.6512	0.3488	TP	3.0306	No
+	3215	O=C(Nc1cccnn1)N1CCC(=Cc2cccc(Oc3ccc(C(F)(F)F)cn3)c2)CC1	9.80188	0	0.3747	-0.3747	TN	0.0558	YES
#	2953	COc1cc(CCc2cc(NC(=O)c3ccc(N4CC(C)NC(C)C4)cc3)[nH]n2)cc(OC)c1	16.1786	1	0.6239	0.3761	TP	0.0387	YES
+	736	COc1nccc(-c2c(-c3ccc(F)cc3)ncn2C2CCC(O)CC2)n1	6.79036	0	0.257	-0.257	TN	0.0429	YES
-	2965	CC(O)(C#Cc1ccc2c(c1)N(c1nc(N)ncc1Cl)CC2)c1nccs1	21.925	1	0.8484	0.1516	TP	1.0403	No
*	561	O=C1OC(c2ccc(O)cc2)(c2ccc(O)cc2)c2ccccc21	10.2569	0	0.3924	-0.3924	TN	0.0231	YES
*	2968	NC(=O)c1cccc(-c2cc(Nc3ccc(OC(F)(F)F)cc3)ncn2)c1	12.7935	1	0.4916	0.5084	FN	0.045	YES
+	3917	CCCCCCCCCCCC(=O)OCN1C(=O)CCc2ccc(OCCCCN3CCN(c4cccc(Cl)c4Cl)CC3)cc21	12.8071	0	0.4921	-0.4921	TN	0.0612	YES
-	2995	NC(=O)c1noc(C(CCCC2CCCCC2)CC(=O)NO)n1	13.5243	1	0.5201	0.4799	TP	1.0238	No
-	1021	CC(C)CC(CN)CC(=O)O	6.02517	0	0.2271	-0.2271	TN	0.0063	YES
+	3001	CC1(N2CCC(n3c(C4CCCNC4)nc4ccccc43)CC2)CCCCCCC1	20.0906	1	0.7767	0.2233	TP	2.0536	No
#	3423	CCC1OC(=O)C(C)C(=O)C(C)C(OC2OC(C)CC(N(C)C)C2O)C(C)(OC)CC(C)C(=O)C(C)C2N(CCCCn3cnc(-c4cccnc4)c3)C(=O)OC12C	-0.40071	0	-0.024	0.024	TN	0.0773	YES
#	3003	Cc1ccc(NC(=O)Nc2cc(C(F)(F)F)ccc2F)cc1Nc1ccc2c(c1)NC(=O)C2=Cc1ccc[nH]1	21.7485	1	0.8415	0.1585	TP	0.0547	YES
+	2801	C#CCN(C)CC1=Cc2ccccc2Oc2ccccc21	13.3803	0	0.5145	-0.5145	FP	0.0287	YES
*	3020	c1ccc(CNc2nc(N3CCOc4ccccc43)nc3c2CCCC3)cc1	40.3615	1	1.5689	-0.5689	TP	2.0409	No
#	2937	O=C(Nc1ccccc1Br)NC1CCN(c2ccc(C(F)(F)F)cn2)C1	6.78629	0	0.2568	-0.2568	TN	0.0407	YES
*	3026	N#Cc1c(C2CCNCC2)cc(-c2c(O)cccc2OCC2CC2)nc1N	14.4245	1	0.5553	0.4447	TP	0.0363	YES
#	3228	COc1cnc(-n2cnc(C)n2)c2[nH]cc(C(=O)C(=O)N3CCN(C(=O)c4ccccc4)CC3)c12	12.3039	0	0.4724	-0.4724	TN	0.0496	YES
*	3033	O=C1CSC(=O)N1C(CCc1ccncc1)COc1ccc(-c2cccc([N+](=O)[O-])c2)cc1	20.9586	1	0.8106	0.1894	TP	0.0367	YES
+	1903	COc1ccc2c(=O)c(C)c(-c3ccccc3)oc2c1CN(C)C	12.1925	0	0.4681	-0.4681	TN	1.0335	No
+	3073	COc1ccc(C(O)C(C)Oc2ccc(C3OC(c4ccc(OC(C)C(O)c5ccc(OC)c(OC)c5)c(OC)c4)C(C)C3C)cc2OC)cc1OC	17.1124	1	0.6603	0.3397	TP	0.0773	YES
#	2161	COc1c(N2CC3CCCNC3C2)c(F)cc2c(=O)c(C(=O)O)cn(C3CC3)c12	12.2147	0	0.4689	-0.4689	TN	0.051	YES
-	3081	Cc1cc(Nc2ncc(Cl)c(Nc3ccccc3S(=O)(=O)C(C)C)n2)c(OC(C)C)cc1C1CCNCC1	16.6932	1	0.644	0.356	TP	0.0444	YES
-	3387	Cc1cccc(-c2n[nH]cc2-c2ccc(F)c(-c3cnn(CCO)c3)c2)n1	6.77217	0	0.2563	-0.2563	TN	0.048	YES
+	3083	NC(=O)c1cnc(NC2CCCCC2N)nc1Nc1cccc(-n2nccn2)c1	19.1302	1	0.7392	0.2608	TP	0.0382	YES
+	3946	Cc1ccc(C(=O)NO)cc1NCc1ccccc1	10.2479	0	0.3921	-0.3921	TN	1.0161	No
+	3084	CCOc1ccccc1-n1c(C(C)N2CCN(C(=O)COc3ccc(Cl)cc3)CC2)nc2ccccc2c1=O	18.8351	1	0.7277	0.2723	TP	2.0545	No
-	3838	CC(=O)OCC1=C(C(=O)O)N2C(=O)C(NC(=O)CC#N)C2SC1	6.47658	0	0.2447	-0.2447	TN	0.0392	YES
*	3089	Cc1cn(CCN2CCN(c3ccccc3-c3cc(C#N)cc(C(=O)NCCCN4CCCC4)c3)CC2)c2ccccc12	24.883	1	0.964	0.036	TP	1.0705	No
*	530	CCN1CC2(COC)C(O)CC(OC)C34C5CC6(O)C(OC)C(O)C(OC(C)=O)(C5C6OC(=O)c5ccccc5)C(C(OC)C23)C14	15.3624	0	0.592	-0.592	FP	0.0883	YES
*	3110	Cn1c(NCC(N)Cc2ccccc2)nc(-c2ccncc2)c(-c2ccc3ccccc3c2)c1=O	16.0531	1	0.6189	0.3811	TP	0.0473	YES
*	2527	C=CC(=O)Nc1cccc(Oc2nc(Nc3ccc(N4CCN(C)CC4)cc3OC)ncc2Cl)c1	6.94079	0	0.2629	-0.2629	TN	0.0548	YES
-	3121	COc1ccc(CNC(=O)Nc2ncc([N+](=O)[O-])s2)cc1	18.665	1	0.721	0.279	TP	0.025	YES
+	3947	O=C(NCc1c(F)cc(F)cc1F)c1cn2c(c(O)c1=O)C(=O)N1C3CCC(C3)OC1C2	0.42035	0	0.008	-0.008	TN	1.0626	No
-	3122	N#Cc1ccc2[nH]cc(CCCCN3CCN(c4ccc5oc(C(N)=O)cc5c4)CC3)c2c1	22.4566	1	0.8692	0.1308	TP	0.0493	YES
-	65	NC(=O)c1ccccc1	5.76119	0	0.2168	-0.2168	TN	0.0049	YES
+	3125	CCCN1CCN(c2ccc(C(=O)NC3(C(=O)NCC#N)CCCCC3)cc2)CC1	27.4268	1	1.0634	-0.0634	TP	0.0419	YES
-	527	O=c1ccc2cc3ccoc3cc2o1	5.65959	0	0.2128	-0.2128	TN	4.0201	No
*	3145	O=c1ccc2ccc(OCCCCN3CCN(c4cccc5sccc45)CC3)cc2[nH]1	15.722	1	0.606	0.394	TP	4.0397	No
-	978	CC(C)=CCC1=C(O)C(=O)c2ccccc2C1=O	4.61011	0	0.1718	-0.1718	TN	0.0234	YES
#	3147	CNC(C)C(=O)NC(C(=O)N1CCCC1c1nc(C(=O)c2ccc(F)cc2)cs1)C1CCCCC1	17.7373	1	0.6848	0.3152	TP	0.044	YES
+	3164	C=CCCCCCCCCC(=O)OC1CCC2C3CCC4=CC(=O)C=CC4(C)C3CCC12C	5.52968	0	0.2077	-0.2077	TN	0.0443	YES
#	3148	COc1cc(NC(=O)Nc2cccc(CNC(=O)OC3CCOC3)c2)ccc1-c1cnco1	19.8576	1	0.7676	0.2324	TP	0.0434	YES
-	2685	NCCNc1ccc(NCCN)c2c1C(=O)c1ccncc1C2=O	15.7182	0	0.6059	-0.6059	FP	0.0288	YES
#	3155	Cc1ncc(NC(=O)c2ccc(CN3CCN(C)CC3)c(C(F)(F)F)c2)cc1Nc1nccc(-c2cccnc2)n1	28.559	1	1.1077	-0.1077	TP	0.0572	YES
+	2841	CN(C)CCN1C(=O)c2cccc3cc(N)cc(c23)C1=O	4.29854	0	0.1596	-0.1596	TN	0.0283	YES
#	3170	CCCC(NC1CCc2cc(F)cc(F)c2C1)C(=O)Nc1cn(C(C)(C)CNCC(C)(C)C)cn1	18.7026	1	0.7225	0.2775	TP	0.0515	YES
*	1017	O=C(NC(Cc1cc(=O)[nH]c2ccccc12)C(=O)O)c1ccc(Cl)cc1	5.20836	0	0.1951	-0.1951	TN	0.0262	YES
*	3205	COc1cccc(N2CCN(C3=Nc4c(F)cccc4C(CC(=O)O)N3c3cc(C(F)(F)F)ccc3OC)CC2)c1	32.6553	1	1.2677	-0.2677	TP	4.072	No
*	3043	CCOc1ccccc1N/N=C1/C(=O)N(c2nc(-c3ccccc3)cs2)N=C1C	12.1601	0	0.4668	-0.4668	TN	0.0471	YES
*	3208	O=C1NC(=O)C(c2cnc3ccccn23)=C1c1cn2c3c(cc(F)cc13)CN(C(=O)N1CCCCC1)CC2	29.3579	1	1.1389	-0.1389	TP	0.0533	YES
*	2453	Cn1c(=O)c(Oc2ccc(F)cc2F)cc2cnc(NC3CCOCC3)nc21	7.3264	0	0.2779	-0.2779	TN	0.0431	YES
+	3212	Cn1cc(-c2cc(Oc3cc(F)c(NC(=O)C4(C(=O)Nc5ccccc5)CC4)cc3F)ccn2)cn1	25.1467	1	0.9743	0.0257	TP	1.0706	No
-	3891	COCC1CC(c2nc(-c3ccc4c(c3)COc3cc5c(ccc6[nH]c(C7CCC(C)N7C(=O)C(NC(=O)OC)C(C)C)nc65)cc3-4)c[nH]2)N(C(=O)C(NC(=O)OC)c2ccccc2)C1	1.5078	0	0.0505	-0.0505	TN	5.0909	No
-	3224	C=CC1(C)CC(OC(=O)CSC2CC3CCC(C2)N3C)C2(C)C(C)CCC3(CCC(=O)C32)C(C)C1O	23.5738	1	0.9128	0.0872	TP	0.0474	YES
-	539	O=C(O)c1ccccc1S	10.6176	0	0.4065	-0.4065	TN	0.0127	YES
+	3239	CS(=O)(=O)N1CCC(NC(=O)c2[nH]ncc2NC(=O)c2c(Cl)cccc2Cl)CC1	11.6086	1	0.4453	0.5547	FN	0.0368	YES
*	901	Cc1cc(SCc2sc(-c3ccc(C(F)(F)F)c(F)c3)nc2C)ccc1OCC(=O)O	11.6655	0	0.4475	-0.4475	TN	0.0606	YES
#	3246	CCCCCOc1ccc(-c2ccc(-c3ccc(C(=O)NC4CC(O)C(O)NC(=O)C5C(O)C(C)CN5C(=O)C(C(C)O)NC(=O)C(C(O)C(O)c5ccc(O)cc5)NC(=O)C5CC(O)CN5C(=O)C(C(C)O)NC4=O)cc3)cc2)cc1	29.2537	1	1.1348	-0.1348	TP	0.1336	YES
+	2347	Nc1ccccc1C(=O)OCC(O)CO	4.20037	0	0.1558	-0.1558	TN	0.0109	YES
+	3251	CCCC1(CCC)CCC2(CCN(CCCN(CC)CC)C2)CC1	17.6871	1	0.6828	0.3172	TP	0.0232	YES
-	2945	CNC(=O)c1ccc(-c2cnc3ncc(Cc4ccc5ncccc5c4)n3n2)cc1F	7.2699	0	0.2757	-0.2757	TN	3.0538	No
*	3252	CC1(C)CN2C(CSC(=NC3CCCCC3)NC3CCCCC3)=CSC2=N1	18.4082	1	0.711	0.289	TP	1.0435	No
-	1038	CC1CCC(C(C)C)C(=O)C1	4.51063	0	0.1679	-0.1679	TN	0.0081	YES
+	3266	CON(C)C(=O)N1N=C(c2cc(F)ccc2F)SC1(CCCN)c1ccccc1	19.0539	1	0.7362	0.2638	TP	3.0386	No
*	1851	CC12C=CC(=O)C=C1CCC1C2C(O)CC2(C)C1CCC2(O)C(=O)CO	6.24953	0	0.2358	-0.2358	TN	0.0286	YES
*	3278	Cc1nc(C)c(CN2CCN(C(c3ccc(F)cc3)c3ccc(F)cc3)CC2)nc1C	25.7726	1	0.9988	0.0012	TP	0.0487	YES
-	173	O=C1N(c2ccccc2)c2ccccc2C1(Cc1ccncc1)Cc1ccncc1	17.7357	0	0.6847	-0.6847	FP	0.0288	YES
-	3286	Nc1ncnc2c1c(-c1cccc(OCc3ccccc3)c1)cn2C1CC(CN2CCCC2)C1	18.6647	1	0.721	0.279	TP	0.0424	YES
+	1786	CN(CC=Cc1ccccc1)Cc1cccc2ccccc12	13.2095	0	0.5078	-0.5078	FP	0.0193	YES
-	3297	Cc1cncc(CN2CCC(=C3c4ccc(Cl)cc4CCc4cccnc43)CC2)c1	27.2721	1	1.0574	-0.0574	TP	2.0407	No
#	1852	Oc1ccc2c3c1OC1C(O)CCC4(O)C(C2)N(CC2CCC2)CCC314	10.4561	0	0.4002	-0.4002	TN	0.0325	YES
#	3302	Cn1nc(C(C)(C)C)cc1C(=O)NC(Cc1cccc(Cl)c1)C(=O)NCC#N	16.9548	1	0.6542	0.3458	TP	0.0345	YES
#	3562	CC(=O)NC(Cc1ccc2ccccc2c1)C(=O)NC(Cc1ccc(Cl)cc1)C(=O)NC(Cc1cccnc1)C(=O)NC(CO)C(=O)NC(Cc1ccc(O)cc1)C(=O)NC(CCCNC(N)=O)C(=O)NC(CC(C)C)C(=O)NC(CCCNC(=N)N)C(=O)N1CCCC1/C(O)=N/C(C)C(=N)O	-1.92577	0	-0.0836	0.0836	TN	0.0915	YES
-	3312	CCC(C)Nc1cc(C(=O)NC2CC3CCC(C2)N3c2ccc(C(=O)C3CC3)cn2)c(C)cc1C(N)=O	27.3692	1	1.0612	-0.0612	TP	0.0471	YES
+	566	Cc1cc(=O)n(-c2ccccc2)[nH]1	3.35479	0	0.1227	-0.1227	TN	0.0187	YES
+	3322	CNCc1ccc(-c2cc(-c3nc(-c4ccc(S(=O)(=O)C(C)C)cc4)cnc3N)on2)cc1	26.5444	1	1.0289	-0.0289	TP	3.0563	No
#	3941	O=C(O)C1CCc2cc(C3CCCCC3)c(Cl)cc21	12.5101	0	0.4805	-0.4805	TN	0.0246	YES
#	3327	CC(NC(=O)C(Cc1ccccc1)NC(=O)OCc1ccccc1)C(=O)CF	19.5865	1	0.757	0.243	TP	0.0221	YES
+	3124	O=c1[nH]c(N2CCOCC2)cn1-c1ccc(Cl)cc1	1.72509	0	0.059	-0.059	TN	3.0224	No
#	3331	OCCOc1ccc(C(=C(CCCl)c2ccccc2)c2ccccc2)cc1	26.3995	1	1.0233	-0.0233	TP	0.0269	YES
#	1160	CC=CC1=C(C(=O)O)N2C(=O)C(NC(=O)C(N)c3ccc(O)cc3)C2SC1	-1.12945	0	-0.0525	0.0525	TN	0.042	YES
*	3338	CC(C)(C)c1ccc(CN2CCN(C(c3ccccc3)c3ccc(Cl)cc3)CC2)cc1	28.4464	1	1.1033	-0.1033	TP	0.0416	YES
-	2513	COc1ccc(CCN2CCN(CCCc3ccccc3)CC2)cc1OC	12.7478	0	0.4898	-0.4898	TN	0.0289	YES
#	3348	Cc1nc2ccc(-n3ncc(C(=O)c4cc5ccccc5[nH]4)c3N)cc2[nH]1	16.0662	1	0.6195	0.3805	TP	0.0394	YES
-	3935	CC1CCCC(C)N1C(=S)Nc1cccc(C(F)(F)F)c1	14.0857	0	0.5421	-0.5421	FP	0.0407	YES
#	3356	Nc1nc(Nc2ccc3c(c2)CCC(N2CCCC2)CC3)nn1-c1cc2c(nn1)-c1ccccc1CCC2	29.504	1	1.1446	-0.1446	TP	0.0567	YES
-	1827	CC1=C(C(=O)O)N2C(=O)C(NC(=O)C(N)c3ccc(O)cc3)C2SC1	1.42608	0	0.0473	-0.0473	TN	0.0401	YES
*	3359	CCCCCCCCCC(=O)OCCN1CCN(CCCN2c3ccccc3Sc3ccc(C(F)(F)F)cc32)CC1	31.2552	1	1.213	-0.213	TP	0.0606	YES
#	113	C[N+](C)(C)CCCCCCCCCC[N+](C)(C)C	7.74668	0	0.2943	-0.2943	TN	0.0233	YES
*	3361	CC(C)(CNC(=O)c1cccc(-c2noc(C(F)(F)F)n2)c1)c1coc(-c2ccccc2)n1	20.3649	1	0.7874	0.2126	TP	3.0556	No
*	2243	CN1CCN(c2nc(C3=C(c4c[nH]c5ccccc45)C(=O)NC3=O)c3ccccc3n2)CC1	10.6039	0	0.406	-0.406	TN	5.0491	No
*	3368	CC(C=CC1CC1(C)c1ccc2c(c1)C(C)(C)CCC2(C)C)=CC(=O)O	12.5068	1	0.4804	0.5196	FN	0.0271	YES
#	579	CC[N+](C)(CC)CCOC(=O)C(O)(c1ccccc1)C1CCCCC1	10.8841	0	0.417	-0.417	TN	0.0241	YES
+	3370	CC#CC(CC(=O)O)c1ccc(OCc2cccc(-c3ccc(C(F)(F)F)cc3)c2)cc1	25.2795	1	0.9795	0.0205	TP	0.0557	YES
+	3875	C=CC=CCC1=C(C)C(OC(=O)C2C(C=C(C)C)C2(C)C)CC1=O	6.3072	0	0.2381	-0.2381	TN	0.0326	YES
-	3381	Fc1ccc(-c2[nH]c(-c3ccccc3F)nc2-c2ccncc2)cc1	20.4375	1	0.7903	0.2097	TP	3.0419	No
-	2546	CNCc1ccc(-c2[nH]c3cc(F)cc4c3c2CCNC4=O)cc1	12.9279	0	0.4968	-0.4968	TN	0.0383	YES
#	3382	O=C(CCCN1CCC(n2c(=S)[nH]c3ccccc32)CC1)c1ccc(F)cc1	29.1286	1	1.1299	-0.1299	TP	0.0496	YES
-	2598	NC1C2CN(c3nc4c(cc3F)c(=O)c(C(=O)O)cn4-c3ccc(F)cc3F)CC12	-3.70412	0	-0.1531	0.1531	TN	0.0728	YES
#	3384	Clc1cc2c(NC3CCCC3)nnc(-c3ccncc3)c2cc1Cl	20.4302	1	0.79	0.21	TP	0.0374	YES
-	2186	O=C1CCCC(=O)C1=C(O)c1ccc(C(F)(F)F)cc1[N+](=O)[O-]	14.7088	0	0.5664	-0.5664	FP	0.0373	YES
#	3390	O=C(O)c1ccc(CCCc2ccc(OCCc3ccc(F)cc3)cc2)o1	17.5045	1	0.6757	0.3243	TP	0.0376	YES
*	3531	CCCCCC(O)C=CC1C(O)CC(=O)C1CCCCCCC(=O)O	5.09253	0	0.1906	-0.1906	TN	0.0207	YES
+	3398	CN1CCC(c2c(O)cc(O)c3c(=O)cc(-c4ccc(C(F)(F)F)cc4Cl)oc23)C1CO	4.2107	1	0.1562	0.8438	FN	1.0651	No
-	1666	Cc1cc(Nc2cc(N3CCN(C)CC3)nc(Sc3ccc(NC(=O)C4CC4)cc3)n2)[nH]n1	8.04609	0	0.306	-0.306	TN	0.0483	YES
-	3411	O=C(Nc1ncc([N+](=O)[O-])s1)c1ccccc1O	22.1729	1	0.8581	0.1419	TP	0.0192	YES
#	3900	CN1CCN(C(=O)c2ccc(-c3ccc4c(C=O)c(O)ccc4c3)s2)CC1	11.9463	0	0.4585	-0.4585	TN	0.0362	YES
*	3415	COc1cc(N2CCN(C)CC2)ccc1Nc1nccc(-c2cn(C)c3cnccc23)n1	21.9278	1	0.8485	0.1515	TP	0.0425	YES
-	1610	CCC(C)(C)c1ccc(CC(C)CN2CC(C)OC(C)C2)cc1	16.2407	0	0.6263	-0.6263	FP	0.0233	YES
#	3463	CCCCNc1ncc2c(-c3ccc(CN4CCN(C)CC4)cc3)cn(C3CCC(O)CC3)c2n1	25.4324	1	0.9855	0.0145	TP	0.0517	YES
#	1620	NC1CCN(c2nc3c(cc2F)c(=O)c(C(=O)O)cn3-c2ccc(F)cc2F)C1	3.38426	0	0.1239	-0.1239	TN	0.0501	YES
#	3464	COc1ccc(C(C)(C)C)cc1CNC1C2CCN(CC2)C1C(c1ccccc1)c1ccccc1	24.7226	1	0.9577	0.0423	TP	0.0362	YES
#	79	CC(C)(Oc1ccc(C2CC2(Cl)Cl)cc1)C(=O)O	-2.23428	0	-0.0957	0.0957	TN	0.0205	YES
#	3469	O=C1Nc2nc(-c3c(O)cccc3OCC3CC3)cc(C3CCCNC3)c2CO1	30.5729	1	1.1864	-0.1864	TP	0.0634	YES
+	855	NC(=O)c1ccccc1O	5.69249	0	0.2141	-0.2141	TN	0.0057	YES
+	3475	CC(C)C(O)(c1ccc2cc(OC(F)F)c(OC(F)F)cc2c1)c1cn[nH]n1	20.5751	1	0.7957	0.2043	TP	0.0369	YES
*	1266	CC(=O)OCC1=C(C(=O)O)N2C(=O)C(NC(=O)CSc3ccncc3)C2SC1	1.96248	0	0.0683	-0.0683	TN	0.0458	YES
#	3483	O=C1NNc2nc(CN3Cc4ccccc4C3)nc3cccc1c23	18.1211	1	0.6998	0.3002	TP	0.0402	YES
+	910	CN1CC(=O)N=C1NC(=O)Nc1cccc(Cl)c1	-5.52846	0	-0.2244	0.2244	TN	0.0173	YES
#	3508	CCCCCCCCCCCCCCCCOc1nc2ccc(C)cc2c(=O)o1	13.6673	1	0.5257	0.4743	TP	0.0348	YES
#	1428	O=C(O)CCCC=CCC1C(O)CC(O)C1C=CC(O)COc1cccc(Cl)c1	10.7524	0	0.4118	-0.4118	TN	0.0253	YES
*	3511	COCCNC(=O)Nc1ccc2nc(-c3cccs3)c(-c3cccs3)nc2c1	27.6297	1	1.0713	-0.0713	TP	4.04	No
#	825	COC(=O)C(Cc1ccccc1)NC(=O)C(N)CC(=O)O	5.16546	0	0.1935	-0.1935	TN	0.0145	YES
#	3514	CC1CN(CC(=O)N2CC(C)(C)c3ncc(Cc4ccc(F)cc4)cc32)C(CN2CCOCC2C)CN1	25.7653	1	0.9985	0.0015	TP	0.06	YES
*	1177	OC1COC(O)C(O)C1O	-1.16852	0	-0.0541	0.0541	TN	0.0094	YES
*	3525	CC1=C2CC3C(CCC4CC(NS(C)(=O)=O)CCC43C)C2CCC2(C1)OC1CC(C)CNC1C2C	19.6935	1	0.7612	0.2388	TP	0.0583	YES
-	2399	CCCS(=O)(=O)Nc1ccc(F)c(C(=O)c2c[nH]c3ncc(-c4ccc(Cl)cc4)cc23)c1F	11.1965	0	0.4292	-0.4292	TN	0.055	YES
#	3530	CCCCCCC(C)(C)c1cc(O)c2c(c1)OC(C)(C)C1CC=C(CO)CC21	19.1191	1	0.7388	0.2612	TP	0.0311	YES
#	3316	CCc1c(Cl)c(O)c(Cl)c(O)c1C(=O)OC1C(C)OC(OCC2=CC=CCC(O)C(C)=CC(CC)C(OC3OC(C)(C)C(OC(=O)C(C)C)C(O)C3O)C(C)=CC(C)=CCC(C(C)O)OC2=O)C(OC)C1O	6.65226	0	0.2516	-0.2516	TN	0.0867	YES
*	3532	COc1ccccc1C(=O)Nc1cc2c(cc1N1CCCC1)n(C)c(=O)n2C	12.9704	1	0.4985	0.5015	FN	1.035	No
#	2890	CC(C)(O)C1CCC(C)(C2C(O)CC3(C)C4CC(OC5OC(CO)C(O)C(O)C5O)C5C(C)(C)C(OC6OCC(O)C(O)C6O)CCC56CC46CCC23C)O1	5.83304	0	0.2196	-0.2196	TN	0.105	YES
#	3544	C=CC(=O)Nc1cccc(C)c1Nc1ncc2cc(-c3c(Cl)c(OC)cc(OC)c3Cl)ccc2n1	18.0944	1	0.6987	0.3013	TP	0.0414	YES
*	1118	CC(S)C(=O)NCC(=O)O	-2.212	0	-0.0948	0.0948	TN	0.0138	YES
-	3567	Cc1cc(C)c(CNC(=O)c2cc(-c3ccc(N4CCN(C)CC4)nc3)cc3c2c(C)cn3C(C)C)c(=O)[nH]1	13.3355	1	0.5127	0.4873	TP	0.0485	YES
#	1693	CCn1cc(C(=O)O)c(=O)c2cc(F)c(N3CCN(C)CC3)cc21	13.0924	0	0.5032	-0.5032	FP	0.0315	YES
*	3586	COc1nc(OCc2cccc(-c3ccccc3)c2C)ccc1CNCCNC(C)=O	14.7494	1	0.568	0.432	TP	0.0406	YES
#	1157	O=C(O)c1c(Cl)c(Cl)c(Cl)c(Cl)c1-c1c2cc(I)c(=O)c(I)c-2oc2c(I)c(O)c(I)cc12	7.47457	0	0.2837	-0.2837	TN	0.0383	YES
-	3591	Nc1nc(OC(c2ccc(-c3cccc(F)c3)cc2)C(F)(F)F)cc(-c2ccc(CC(N)C(=O)O)cc2)n1	17.305	1	0.6679	0.3321	TP	0.0612	YES
#	983	O=C(OCc1ccccc1)c1ccccc1	14.514	0	0.5588	-0.5588	FP	0.0123	YES
*	3593	CCOC(=O)NC1CCC2C(C1)CC1C(=O)OC(C)C1C2C=Cc1ccc(-c2cccc(F)c2)cn1	15.1203	1	0.5825	0.4175	TP	0.0422	YES
+	1655	O=C(O)CCc1ccc(NCc2cccc(Oc3ccccc3)c2)cc1	11.0124	0	0.422	-0.422	TN	0.0344	YES
#	3607	COCCNCc1ccc(-c2cc3nccc(Oc4ccc(NC(=S)NC(=O)Cc5ccc(F)cc5)cc4F)c3s2)nc1	10.0261	1	0.3834	0.6166	FN	0.0791	YES
*	2482	Nc1nc(=O)n(C2OC(CO)C(O)C2F)cc1I	-5.9211	0	-0.2398	0.2398	TN	0.028	YES
-	3619	CC12CCC3c4ccc(OC(=O)N(CCCl)CCCl)cc4CCC3C1CCC2OP(=O)(O)O	21.9242	1	0.8484	0.1516	TP	0.0478	YES
*	1401	CCOC(=O)OC(C)OC1=C(C(=O)Nc2ccccn2)N(C)S(=O)(=O)c2ccccc21	9.30407	0	0.3552	-0.3552	TN	0.0394	YES
-	3638	CCC(NC(=O)C(CS(=O)(=O)CC1CC1)NC(c1ccc(F)cc1)C(F)(F)F)C(=O)C(=O)NC1CC1	21.2076	1	0.8204	0.1796	TP	0.0525	YES
+	753	CC(C)Cn1cnc2c(N)nc3ccccc3c21	8.20165	0	0.3121	-0.3121	TN	0.0228	YES
-	3644	COc1ccc2c(c1)C1(CC1c1ccc3c(C=Cc4ccc(CN5CC(C)OC(C)C5)cc4)[nH]nc3c1)C(=O)N2	25.2224	1	0.9773	0.0227	TP	0.0719	YES
+	1612	CN(C)C(=O)COC(=O)Cc1ccc(OC(=O)c2ccc(NC(=N)N)cc2)cc1	-4.681	0	-0.1913	0.1913	TN	0.0235	YES
#	3653	Cn1ncc2cc(-c3cnc(N)c(Cl)c3N3CCC4(CCNC4=O)CC3)ccc21	29.6552	1	1.1505	-0.1505	TP	0.0468	YES
#	996	CCCc1nn(C)c2c(=O)[nH]c(-c3cc(S(=O)(=O)N4CCN(C)CC4)ccc3OCC)nc12	7.74708	0	0.2944	-0.2944	TN	0.0623	YES
-	3685	CC(C)CC1C(=O)OC(Cc2ccc(N3CCOCC3)cc2)C(=O)N(C)C(CC(C)C)C(=O)OC(C)C(=O)N(C)C(CC(C)C)C(=O)OC(Cc2ccc(N3CCOCC3)cc2)C(=O)N(C)C(CC(C)C)C(=O)OC(C)C(=O)N1C	22.3645	1	0.8656	0.1344	TP	0.0787	YES
#	2724	CC12Cc3cn[nH]c3CC1CCC1C2CCC2(C)C1CCC2(C)O	6.44354	0	0.2434	-0.2434	TN	0.0289	YES
-	3708	COc1cc(N2CCN(C)CC2)ccc1Nc1ncc2c(n1)N(C)c1ccccc1C(=O)N2	17.4896	1	0.6751	0.3249	TP	0.0392	YES
+	2891	NC1(C(=O)O)CS(=O)(=O)C2C(C(=O)O)C21	-7.00578	0	-0.2822	0.2822	TN	0.0231	YES
+	3714	CC(C)(O)CNc1ncc(-c2ccnc(Nc3ccncc3)n2)c(CC2CC2)n1	16.9952	1	0.6558	0.3442	TP	0.0377	YES
+	2198	CCCCCN(C)CCC(O)(P(=O)(O)O)P(=O)(O)O	-2.33202	0	-0.0995	0.0995	TN	4.0212	No
+	3721	CC1(C)C(=O)N(c2ccc(C#N)c(C(F)(F)F)c2)C(=S)N1Cc1ccc(-c2cn[nH]n2)cc1	17.1331	1	0.6612	0.3388	TP	0.067	YES
+	1992	NCCCCC(NC(=O)C1CCCN1C(=O)C1CSSCC(N)C(=O)NC(Cc2ccccc2)C(=O)NC(Cc2ccccc2)C(=O)NC(CCC(N)=O)C(=O)NC(CC(N)=O)C(=O)N1)C(=O)NCC(N)=O	2.14	0	0.0752	-0.0752	TN	1.0733	No
-	3725	CCc1ccc(N(CC(C)C)S(=O)(=O)c2ccc(OCC3CCOCC3)c(CO)c2)cc1	16.5753	1	0.6394	0.3606	TP	0.0389	YES
#	3396	Cn1cc(-c2cnn3c(N)c(Br)c(C4CCCNC4)nc23)cn1	8.21693	0	0.3127	-0.3127	TN	0.0426	YES
#	3732	c1ccc2c(-c3cnn4cc(-c5ccc(OCCN6CCOCC6)cc5)cnc34)ccnc2c1	14.874	1	0.5729	0.4271	TP	0.0595	YES
*	3528	CCCN(CCC)C(=O)C1=Cc2ccc(-c3ccc(C(=O)N4CCCC4)cc3)cc2N=C(N)C1	12.505	0	0.4803	-0.4803	TN	0.0463	YES
*	3739	CCCCCCCC(=O)NC(CN1CCCC1)C(O)c1ccc2c(c1)OCCO2	16.9912	1	0.6556	0.3444	TP	0.0277	YES
#	2990	Cc1ccc(/C=N/NC(=O)c2ccccc2Oc2ccccc2)o1	-0.66947	0	-0.0345	0.0345	TN	0.0252	YES
#	3742	C=CC(=O)NC1CCOCC1Nc1ncc2cc(-c3c(Cl)c(OC)cc(OC)c3Cl)ccc2n1	10.074	1	0.3853	0.6147	FN	0.0436	YES
#	975	Cc1ccccc1OCC(O)CO	3.47542	0	0.1274	-0.1274	TN	0.0085	YES
*	3747	Cn1cc(-c2ccc(-c3cncc(Cl)c3N3CCC4(CCNC4=O)CC3)cc2)cn1	29.3764	1	1.1396	-0.1396	TP	0.0477	YES
*	3254	COc1ccc(-n2c(SCCCN3C(=O)c4cccc5cccc(c45)C3=O)nnc2-c2ccncc2)cc1	6.50196	0	0.2457	-0.2457	TN	2.061	No
#	3755	CONC(=O)Nc1ccc(-c2sc3c(c2CN(C)Cc2ccccc2)c(=O)n(-c2ccccc2)c(=O)n3Cc2c(F)cccc2F)cc1	27.4825	1	1.0656	-0.0656	TP	0.0756	YES
*	3060	CCCCCCCCCCCCCCCC(=O)OCC(NC(=O)C(Cl)Cl)C(O)c1ccc([N+](=O)[O-])cc1	9.77012	0	0.3734	-0.3734	TN	0.0422	YES
+	3759	c1ccc(-c2cc(CCC3CCNCC3)c3ccccc3n2)cc1	21.0189	1	0.813	0.187	TP	0.0353	YES
-	2815	CNC(=O)c1c(-c2ccc(F)cc2)oc2cc(N(CCO)S(C)(=O)=O)c(C3CC3)cc12	13.4925	0	0.5189	-0.5189	FP	0.0515	YES
*	3776	COc1cc(C(=O)NC(=N)Nc2ccc(C)c(NC(=O)c3ccc(-c4ccccc4)cc3)c2)cc(OC)c1OC	16.3135	1	0.6291	0.3709	TP	0.049	YES
*	3764	COC(=O)C1=C(C)NC(c2ncc(F)cc2F)=NC1c1ccc(F)cc1Cl	8.10141	0	0.3082	-0.3082	TN	0.0415	YES
+	3779	CC(C(=O)Nc1ccc(Cl)cc1)C1CCC(c2ccnc3ccc(F)cc23)CC1	18.7074	1	0.7227	0.2773	TP	0.0327	YES
*	1525	CCN(CC)C(=S)S	7.0523	0	0.2672	-0.2672	TN	0.015	YES
+	3794	Cc1cc2cc(Oc3ccnc(Nc4cccc(CS(=O)(=O)NCCN(C)C)c4)n3)ccc2[nH]1	16.8386	1	0.6496	0.3504	TP	1.0469	No
-	3608	COc1cc(C(CC(=O)O)c2ccc(C)c(CN3CC(C)Oc4ccccc4S3(=O)=O)c2)cc2nnn(C)c12	7.10866	0	0.2694	-0.2694	TN	0.0449	YES
#	3795	O=C(C=Cc1ccc(Cl)cc1)N1CCC2(CC1)CN(Cc1ccc(Cl)c(Cl)c1)C(=O)O2	10.198	1	0.3901	0.6099	FN	0.0337	YES
*	1915	Cc1nc(Nc2ncc(C(=O)Nc3c(C)cccc3Cl)s2)cc(N2CCN(CCO)CC2)n1	11.715	0	0.4494	-0.4494	TN	1.0454	No
+	3806	Cc1cc(OC(CCC(F)(F)F)c2ccc(C(=O)NCCC(=O)O)cc2)cc(C)c1-c1ccc(C(C)(C)C)cc1	13.9433	1	0.5365	0.4635	TP	0.0509	YES
-	3681	COc1cc(O)c(C(=O)Nc2nc(C(=O)NCCN(C(C)C)C(C)C)cs2)cc1OC	11.2139	0	0.4298	-0.4298	TN	0.0349	YES
#	3809	CCNCCc1ccc(CN(CC)c2cc(OC)ccc2C2CCc3cc(O)ccc3C2)cc1	18.141	1	0.7005	0.2995	TP	0.0334	YES
-	905	O=C(NC1CN2CCC1CC2)c1ccc(Cl)cc1	3.71385	0	0.1367	-0.1367	TN	0.0182	YES
*	3823	CC1CC(N)CC(c2ccncc2NC(=O)c2ccc(F)c(-c3c(F)cccc3F)n2)C1	33.1959	1	1.2889	-0.2889	TP	1.0481	No
-	1572	CC(=O)OC1CC2CCC3C(CCC4(C)C3CC([N+]3(C)CCCCC3)C4OC(C)=O)C2(C)CC1N1CCCCC1	4.70782	0	0.1756	-0.1756	TN	1.051	No
-	3840	CC1=C(c2ccc(O)cc2)C(c2ccc(OCCN3CCCCC3)cc2)Oc2cc(O)ccc21	11.9488	1	0.4586	0.5414	FN	0.0404	YES
+	3395	Cc1ncc(Cl)cc1NCc1ccc(C(=O)NC(CC2CCCC2)C(=O)NC2CC2)s1	14.4741	0	0.5572	-0.5572	FP	0.0354	YES
*	3841	CCN(CC)CCNc1ccc(C)c2sc3ccccc3c(=O)c12	16.767	1	0.6468	0.3532	TP	0.0332	YES
-	1902	CN(C)CCC(O)(c1ccccc1)c1ccccc1Cl	16.281	0	0.6279	-0.6279	FP	0.0146	YES
*	3848	CC(C)(O)C1CCC(Nc2ccc3ncc(-c4cccc(C(F)(F)F)c4)n3n2)CC1	23.0784	1	0.8935	0.1065	TP	0.0593	YES
+	1238	COC(c1ccccc1)(c1ccccc1)C(Oc1nc(C)cc(C)n1)C(=O)O	5.61831	0	0.2112	-0.2112	TN	0.0304	YES
+	3913	Cc1cc(O)ccc1C(C)(C)C	5.1681	1	0.1936	0.8064	FN	0.0134	YES
#	312	C=CC(N)CCC(=O)O	0.75954	0	0.0213	-0.0213	TN	0.0059	YES
*	3951	Cc1ccc(NCCN(C)CCNc2ccnc3cc(Cl)ccc23)c2c(=O)c3ccccc3sc12	32.252	1	1.252	-0.252	TP	1.045	No
*	2850	CC1CCC(C(=O)N(c2cc(C#CC(C)(C)C)sc2C(=O)O)C2CCC(O)CC2)CC1	15.0633	0	0.5803	-0.5803	FP	1.0413	No
#	3953	CCCCOCCOc1ccc(-c2ccc3c(c2)/C=C(/C(=O)Nc2ccc(S(=O)Cc4cncn4CCC)cc2)CCCN3CC(C)C)cc1	12.8799	1	0.4949	0.5051	FN	0.065	YES
#	2993	CC1(C)C(N(O)C(=O)Nc2ccc(Cl)cc2)N(c2ccc(Cl)cc2)C(=O)N1CC(=O)NN=CC=Cc1ccc([N+](=O)[O-])o1	-0.80944	0	-0.04	0.04	TN	0.053	YES
+	3954	N#CC1(c2ccc3c(N)ncnn23)OC(CO)C(O)C1O	13.415	1	0.5159	0.4841	TP	0.0305	YES
+	965	CCC(c1ccc(O)cc1)C(CC)c1ccc(O)cc1	12.0863	0	0.4639	-0.4639	TN	0.0145	YES
#	3956	CCC(CC)COC(=O)C(C)NP(=O)(OCC1OC(C#N)(c2ccc3c(N)ncnn23)C(O)C1O)Oc1ccccc1	23.6518	1	0.9159	0.0841	TP	0.0574	YES
#	2217	CCCCN(CCCC)C(=S)S	8.93059	0	0.3406	-0.3406	TN	0.019	YES

## Sheet: Table S2
Set	ID	SMILES	DCW	Expr	Calc	Expr-Calc	Class	DefectSMILES	Applicability
*	6	CN1CCN(CCCN2c3ccccc3Sc3ccc(C(F)(F)F)cc32)CC1	19.4652	1	0.8162	0.1838	TP	0.0472	YES
-	2089	COc1cc(C(=O)NC2CCCNC2)cc(OC)c1OC	2.40041	0	0.2057	-0.2057	TN	0.025	YES
+	10	CN1C2CCC1CC(OC(c1ccccc1)c1ccccc1)C2	7.83178	1	0.4001	0.5999	FN	0.0256	YES
-	1911	COC1C(OC(C)=O)CC(=O)OC(C)CC2OC2/C=C/C(=O)C(C)CC(CC=O)C1OC1OC(C)C(OC2CC(C)(O)C(OC(=O)CC(C)C)C(C)O2)C(N(C)C)C1O	3.31337	0	0.2384	-0.2384	TN	0.0846	YES
*	13	CN(C)CCC=C1c2ccccc2Sc2ccc(Cl)cc21	24.4588	1	0.9949	0.0051	TP	0.0297	YES
-	41	Nc1nc(N)c2nc(CNc3ccc(C(=O)NC(CCC(=O)O)C(=O)O)cc3)cnc2n1	5.13238	0	0.3035	-0.3035	TN	0.0495	YES
*	15	c1cc(-c2sc(-c3ccncc3)c(-c3ccncc3)c2-c2ccncc2)ccn1	22.9202	1	0.9398	0.0602	TP	2.0612	No
-	2030	COP(=S)(OC)Oc1ccc(S(N)(=O)=O)cc1	6.06294	0	0.3368	-0.3368	TN	0.0376	YES
-	16	CN(C)CCC=C1c2ccccc2C=Cc2ccccc21	22.1281	1	0.9115	0.0885	TP	0.0274	YES
*	1733	CC(C(O)c1ccccc1)N(C)C	9.53425	0	0.461	-0.461	TN	0.0144	YES
#	20	CN(C)c1ccccc1CN1CCCN(Cc2ccccc2N(C)C)C1c1ccncc1	19.6105	1	0.8214	0.1786	TP	0.0397	YES
+	1666	Cc1cc(Nc2cc(N3CCN(C)CC3)nc(Sc3ccc(NC(=O)C4CC4)cc3)n2)[nH]n1	1.10672	0	0.1595	-0.1595	TN	0.0592	YES
-	21	CN1CCC(CN2c3ccccc3Sc3ccccc32)C1	17.1083	1	0.7319	0.2681	TP	0.0304	YES
-	3866	CCCCOc1ccc(C[N+]2(C)C3CCC2CC(OC(=O)C(CO)c2ccccc2)C3)cc1	14.64	0	0.6436	-0.6436	FP	0.0328	YES
*	22	CNCCC=C1c2ccccc2CCc2ccccc21	20.754	1	0.8623	0.1377	TP	0.0201	YES
+	627	CC1CC2C3CC(F)C4=CC(=O)C=CC4(C)C3(F)C(O)CC2(C)C1(O)C(=O)COC(=O)C(C)(C)C	3.35256	0	0.2398	-0.2398	TN	0.0588	YES
#	25	O=C1CSC2(CCN(CCCN3c4ccccc4Sc4ccc(Cl)cc43)CC2)N1	34.6228	1	1.3585	-0.3585	TP	0.0559	YES
-	1970	Cc1cc2nc3ccc(=[N+](C)C)cc-3sc2cc1N	3.31799	0	0.2386	-0.2386	TN	0.032	YES
*	34	Clc1ccc2c(c1)C(N1CCNCC1)=Nc1ccccc1O2	10.4225	1	0.4927	0.5073	FN	1.0284	No
+	2877	Cc1ccccc1-n1c(Cn2ncc3c(N)ncnc32)nc2cccc(C)c2c1=O	5.07016	0	0.3013	-0.3013	TN	3.0517	No
+	56	CN(C)CCC=C1c2ccccc2CCc2ccccc21	20.9123	1	0.868	0.132	TP	0.0215	YES
*	891	O=C(C=Cc1ccc(O)c(O)c1)OC(C(=O)O)C(OC(=O)C=Cc1ccc(O)c(O)c1)C(=O)O	-3.80789	0	-0.0163	0.0163	TN	0.0467	YES
*	57	CCCCc1oc2ccccc2c1C(=O)c1cc(I)c(OCCN(CC)CC)c(I)c1	17.4244	1	0.7432	0.2568	TP	1.0758	No
-	2384	COC(=O)c1cc(Cl)ccc1NS(=O)(=O)C(F)(F)F	4.01779	0	0.2636	-0.2636	TN	3.0278	No
*	72	CC(C)COCC(CN(Cc1ccccc1)c1ccccc1)N1CCCC1	20.7656	1	0.8628	0.1372	TP	0.0305	YES
#	460	CCOC(=O)n1ccn(C)c1=S	-9.41851	0	-0.2171	0.2171	TN	0.018	YES
+	99	CN1CCC(=C2c3ccccc3C=Cc3ccccc32)CC1	17.9851	1	0.7633	0.2367	TP	0.0421	YES
*	2396	Cc1n[nH]c(C)c1Cc1sc2c(c1C(=O)N1CC(O)CO1)c(=O)n(C)c(=O)n2CC(C)C	-13.4163	0	-0.3601	0.3601	TN	0.0475	YES
*	100	CN1CCN(C2=Nc3cc(Cl)ccc3Nc3ccccc32)CC1	24.83	1	1.0082	-0.0082	TP	0.0267	YES
+	3075	O=C(O)CC(C(=O)O)N1C(=O)C(=C2C(=O)Nc3ccc(Br)cc32)SC1=S	0.27012	0	0.1295	-0.1295	TN	0.0423	YES
+	101	CCN(CC)CCCC(C)Nc1ccnc2cc(Cl)ccc12	18.9006	1	0.796	0.204	TP	0.0214	YES
+	3391	C=CCN(C=C1C(=O)OC(COC)C2(C)C1=C(O)C(=O)C1=C2C(OC(C)=O)CC2(C)C(=O)CCC12)CC=C	2.80192	0	0.2201	-0.2201	TN	0.0534	YES
*	104	CN(C)CCCN1c2ccccc2CCc2ccc(Cl)cc21	17.3318	1	0.7399	0.2601	TP	0.0235	YES
+	3826	Cn1cc(-c2nc(NC3CCCCC3N)c(F)c3c2C(=O)NC3)cn1	9.14322	0	0.447	-0.447	TN	0.0493	YES
+	106	CN(C)CCCN1c2ccccc2Sc2ccc(Cl)cc21	18.2925	1	0.7743	0.2257	TP	0.0304	YES
-	1997	CNC(C)CC1CCCCC1	9.39524	0	0.456	-0.456	TN	0.0086	YES
*	116	CNCCCN1c2ccccc2CCc2ccccc21	14.5877	1	0.6417	0.3583	TP	0.0208	YES
*	1094	O=C(O)CCC(=O)O	-9.43732	0	-0.2177	0.2177	TN	0.0057	YES
+	121	CCN(CC)CCOC(=O)C1(C2CCCCC2)CCCCC1	8.36085	1	0.419	0.581	FN	0.0194	YES
#	2947	O=S(=O)(F)Cc1ccccc1	2.08699	0	0.1945	-0.1945	TN	0.0192	YES
-	129	O=c1c2ccccc2[se]n1-c1ccccc1	10.8259	1	0.5072	0.4928	TP	0.0243	YES
+	2427	CN(C)CCN(Cc1ccsc1)c1ccccn1	2.85733	0	0.2221	-0.2221	TN	0.0282	YES
+	133	CNCCC(Oc1ccc(C(F)(F)F)cc1)c1ccccc1	13.1866	1	0.5916	0.4084	TP	0.0325	YES
+	1817	NCC1OC(OC2C(N)CC(N)C(OC3OC(CO)C(O)C(N)C3O)C2O)C(O)C(O)C1O	-13.0535	0	-0.3471	0.3471	TN	0.0478	YES
#	152	O=C1Nc2ccc(I)cc2C1=Cc1cc(Br)c(O)c(Br)c1	22.7983	1	0.9355	0.0645	TP	0.0574	YES
*	356	CN(C)Cc1c[nH]c2ccccc12	6.56843	0	0.3549	-0.3549	TN	0.0135	YES
-	166	O=S(=O)(c1cccc2c(I)cccc12)N1CCCNCC1	15.7948	1	0.6849	0.3151	TP	0.0549	YES
-	3700	O=C(Nc1cnn2ccc(N3CCCC3c3cc(F)ccc3F)nc12)N1CCC(O)C1	8.45036	0	0.4222	-0.4222	TN	1.0504	No
-	169	CN(C)CCCN1c2ccccc2CCc2ccccc21	14.746	1	0.6474	0.3526	TP	0.0222	YES
#	214	CN(C)C(=O)Oc1cccc([N+](C)(C)C)c1	3.41196	0	0.2419	-0.2419	TN	0.0189	YES
+	177	CCCc1c(OCCCOc2ccc(OCC(=O)O)cc2)ccc(C(C)=O)c1O	2.62563	1	0.2138	0.7862	FN	0.0285	YES
-	2864	Nc1cccc2c1C(=O)N(C1CCC(=O)NC1=O)C2=O	3.38453	0	0.241	-0.241	TN	0.0185	YES
*	181	CN(C)C(=O)C(CCN1CCC(O)(c2ccc(Cl)cc2)CC1)(c1ccccc1)c1ccccc1	19.0569	1	0.8016	0.1984	TP	0.0442	YES
#	3780	C=CC(=O)Nc1cc(N2CCN(CC)CC2)ccc1Nc1cc(N(C)C(=O)Nc2c(Cl)c(OC)cc(OC)c2Cl)ncn1	3.56574	0	0.2474	-0.2474	TN	0.0604	YES
+	185	CCOC(=O)N1CCC(=C2c3ccc(Cl)cc3CCc3cccnc32)CC1	14.4417	1	0.6365	0.3635	TP	0.0416	YES
+	999	COc1ccc(C(CN(C)C)C2(O)CCCCC2)cc1	4.34717	0	0.2754	-0.2754	TN	0.0245	YES
#	208	CNCCCC12CCC(c3ccccc31)c1ccccc12	12.1555	1	0.5547	0.4453	TP	0.0264	YES
-	2287	N#CCC(C1CCCC1)n1cc(-c2ncnc3[nH]ccc23)cn1	6.63964	0	0.3574	-0.3574	TN	1.0444	No
#	212	COc1ccccc1N1CCN(CC(O)COc2cccc3ccccc23)CC1	13.7304	1	0.6111	0.3889	TP	0.0336	YES
+	1767	CC(=O)OC1(C(C)=O)CCC2C3C=C(C)C4=CC(=O)CCC4C3CCC21C	1.6579	0	0.1792	-0.1792	TN	0.0414	YES
#	216	COC(=O)C1=C(C)NC(C)=C(C(=O)OCCN(C)Cc2ccccc2)C1c1cccc([N+](=O)[O-])c1	19.371	1	0.8129	0.1871	TP	0.0391	YES
-	98	Clc1ccccc1C(c1ccccc1)(c1ccccc1)n1ccnc1	7.34561	0	0.3827	-0.3827	TN	1.0349	No
+	222	CCN(CC)CC#CCOC(=O)C(O)(c1ccccc1)C1CCCCC1	11.1052	1	0.5172	0.4828	TP	0.0327	YES
-	3753	COCCNc1cc(NC(=O)N2CCCc3cc(CN4CCN(C)CC4=O)c(C=O)nc32)ncc1C#N	4.6008	0	0.2845	-0.2845	TN	0.0643	YES
#	223	Cc1ccccc1C(OCCN(C)C)c1ccccc1	13.7844	1	0.613	0.387	TP	0.0203	YES
*	1573	CC(=O)Nc1ccc(OC(=O)c2ccccc2OC(C)=O)cc1	2.08855	0	0.1946	-0.1946	TN	1.0223	No
+	224	O=c1[nH]c2ccccc2n1CCCN1CCN(C(c2ccccc2)c2ccccc2)CC1	26.4062	1	1.0645	-0.0645	TP	0.047	YES
#	2729	COc1ccc(-c2cc(=O)c3c(O)cc(OC4OC(COC5OC(C)C(O)C(O)C5O)C(O)C(O)C4O)cc3o2)cc1O	-1.4681	0	0.0674	-0.0674	TN	0.0782	YES
*	233	CC(CN1c2ccccc2Sc2ccccc21)N(C)C	19.2592	1	0.8089	0.1911	TP	0.0311	YES
*	148	NCC1(CC(=O)O)CCCCC1	1.92794	0	0.1888	-0.1888	TN	0.0085	YES
#	235	CCCNCC(O)COc1ccccc1C(=O)CCc1ccccc1	13.7009	1	0.61	0.39	TP	0.0213	YES
-	3523	CN1C(=O)C(NC(=O)C(CCC(F)(F)F)C(CCC(F)(F)F)C(N)=O)N=C(c2ccccc2)c2ccccc21	4.68654	0	0.2875	-0.2875	TN	0.0563	YES
#	239	OCCN1CCN(CCCN2c3ccccc3Sc3ccc(Cl)cc32)CC1	21.5601	1	0.8912	0.1088	TP	0.035	YES
+	1274	c1ccc(C2(c3ccccc3)CC2C2=NCCN2)cc1	2.71328	0	0.2169	-0.2169	TN	1.0307	No
*	240	CN(C)CCCN1c2ccccc2Sc2ccccc21	15.7067	1	0.6818	0.3182	TP	0.0291	YES
+	1043	Cc1coc2c1C(=O)C(=O)c1c-2ccc2c1CCCC2(C)C	-5.60893	0	-0.0808	0.0808	TN	5.0318	No
+	246	CCC(=O)c1ccc2c(c1)N(CCCN(C)C)c1ccccc1S2	16.9253	1	0.7254	0.2746	TP	0.0283	YES
+	639	CC(=O)OC1CC2CCC3C(CCC4(C)C3CC([N+]3(C)CCCCC3)C4OC(C)=O)C2(C)CC1[N+]1(C)CCCCC1	-2.1623	0	0.0425	-0.0425	TN	0.055	YES
-	250	CNCCCC1c2ccccc2C=Cc2ccccc21	15.3451	1	0.6688	0.3312	TP	0.0246	YES
+	1632	CC12C=CCC1C1CCC3CC(=O)CCC3(C)C1CC2	8.63416	0	0.4288	-0.4288	TN	1.0247	No
*	252	CN1CCN(CCCN2c3ccccc3Sc3ccc(Cl)cc32)CC1	20.601	1	0.8569	0.1431	TP	0.0336	YES
#	805	O=C(O)Cc1cccc2ccccc12	4.82853	0	0.2926	-0.2926	TN	0.0154	YES
*	262	COC(=O)C1C2CC3c4[nH]c5cc(OC)ccc5c4CCN3CC2CC(OC(=O)c2cc(OC)c(OC)c(OC)c2)C1OC	19.7127	1	0.8251	0.1749	TP	0.1064	YES
*	976	CC(C(=O)O)c1ccc(C(=O)c2cccs2)cc1	-1.80155	0	0.0554	-0.0554	TN	0.0262	YES
*	263	O=C(c1ccc(OCCN2CCCCC2)cc1)c1c(-c2ccc(O)cc2)sc2cc(O)ccc12	20.4219	1	0.8505	0.1495	TP	0.0505	YES
+	3352	C=C(C)C1CCC(C)=CC1c1c(O)cc(CCCCC)cc1O	11.8163	0	0.5426	-0.5426	FP	0.0266	YES
*	278	Oc1ccc(-c2nc(-c3ccncc3)c(-c3ccc(F)cc3)[nH]2)cc1	19.6878	1	0.8242	0.1758	TP	0.0547	YES
*	2582	O=C(Oc1ccc([N+](=O)[O-])cc1)N1CCC(C(O)(c2ccc3c(c2)OCO3)c2ccc3c(c2)OCO3)CC1	9.47579	0	0.4589	-0.4589	TN	0.0556	YES
#	279	O=C(CCCN1CCC2(CC1)C(=O)NCN2c1ccccc1)c1ccc(F)cc1	10.5274	1	0.4965	0.5035	FN	0.0402	YES
*	2347	Nc1ccccc1C(=O)OCC(O)CO	-0.82574	0	0.0903	-0.0903	TN	0.0121	YES
-	288	CN1CCN(CCC=C2c3ccccc3Sc3ccc(S(=O)(=O)N(C)C)cc32)CC1	16.9784	1	0.7273	0.2727	TP	0.0501	YES
-	3074	O=C(NOCCO)c1ccc2cncn2c1Nc1ccc(I)cc1F	4.64398	0	0.286	-0.286	TN	1.0584	No
-	291	OC(CCN1CCCCC1)(c1ccccc1)C1CCCCC1	10.4669	1	0.4943	0.5057	FN	0.0264	YES
*	155	CC[N+](CC)(CC)CCOc1cccc(OCC[N+](CC)(CC)CC)c1OCC[N+](CC)(CC)CC	8.22087	0	0.414	-0.414	TN	0.0326	YES
#	294	CN(C)CCCN1c2ccccc2Sc2ccc(C(F)(F)F)cc21	17.1567	1	0.7336	0.2664	TP	0.044	YES
-	406	COc1cc(C(=O)NCc2ccc(OCCN(C)C)cc2)cc(OC)c1OC	3.5112	0	0.2455	-0.2455	TN	0.031	YES
#	295	CC(CN(C)C)CN1c2ccccc2CCc2ccccc21	19.2003	1	0.8068	0.1932	TP	0.0249	YES
-	142	CC(C)=CCCC(C)=CCCC(C)=CCSc1ccccc1C(=O)O	2.63727	0	0.2142	-0.2142	TN	0.027	YES
+	297	Nc1nc(N)c2nc(-c3ccccc3)c(N)nc2n1	8.63451	1	0.4288	0.5712	FN	0.0435	YES
*	347	NC1CONC1=O	0.1482	0	0.1252	-0.1252	TN	0.0102	YES
+	355	CCCCOc1cc(C(=O)NCCN(CC)CC)c2ccccc2n1	11.9795	1	0.5484	0.4516	TP	0.029	YES
*	1565	C#CC1(O)CCC2C3CCC4=CC(=O)CCC4=C3C=CC21CC	17.4627	0	0.7446	-0.7446	FP	0.0448	YES
+	372	CN(C(=O)CN(CCO)CC(=O)N(C)C(C)(C)Cc1ccccc1)C(C)(C)Cc1ccccc1	17.8074	1	0.7569	0.2431	TP	0.0421	YES
#	2969	O=C(O)/C(S)=C/c1ccc(I)cc1	3.58983	0	0.2483	-0.2483	TN	0.0563	YES
-	380	CN(C)CCCOc1nn(Cc2ccccc2)c2ccccc12	15.6025	1	0.678	0.322	TP	0.0274	YES
+	1924	O=[N+]([O-])c1ccc([As](=O)(O)O)cc1	0.27409	0	0.1297	-0.1297	TN	0.0114	YES
#	417	CN(C)CCC=C1c2ccccc2CSc2ccccc21	20.0589	1	0.8375	0.1625	TP	0.0316	YES
+	3375	CN(C)c1nc2c(Br)c(Br)c(Br)c(Br)c2n1CC(=O)O	14.4915	0	0.6383	-0.6383	FP	0.0494	YES
+	427	CC(C)N=c1cc2n(-c3ccc(Cl)cc3)c3ccccc3nc-2cc1Nc1ccc(Cl)cc1	31.0956	1	1.2323	-0.2323	TP	4.0579	No
-	2559	CC(C)C(=O)Nc1ncc(-c2cc(C(F)F)nn2-c2c(Cl)cccc2Cl)s1	9.27712	0	0.4518	-0.4518	TN	4.0551	No
-	434	CCCCc1cc2ccccc2c(OCCN(C)C)n1	13.7737	1	0.6126	0.3874	TP	0.0226	YES
*	2761	CCn1c(C(=O)N(C2CC2)C2CC2)cc2c3c(ncn3C)c(Nc3cc(C)n(C)n3)nc21	-3.00841	0	0.0123	-0.0123	TN	0.0565	YES
-	435	CCN(CC)CCNc1ccc(CO)c2sc3ccccc3c(=O)c12	15.0638	1	0.6588	0.3412	TP	0.0333	YES
*	1401	CCOC(=O)OC(C)OC1=C(C(=O)Nc2ccccn2)N(C)S(=O)(=O)c2ccccc21	13.6822	0	0.6094	-0.6094	FP	0.0442	YES
-	438	CC(=O)c1ccc2c(c1)N(CCCN(C)C)c1ccccc1S2	16.3603	1	0.7052	0.2948	TP	0.0276	YES
+	454	COc1cc(C)nc(-n2nc(C)cc2OC)n1	-0.13477	0	0.1151	-0.1151	TN	4.0317	No
*	442	CC(=O)c1ccc2c(c1)N(CCCN1CCC(CCO)CC1)c1ccccc1S2	18.1095	1	0.7677	0.2323	TP	0.0325	YES
*	920	CC(C)(C)NC(=O)C1CCC2C3CCC4NC(=O)C=CC4(C)C3CCC12C	7.93605	0	0.4038	-0.4038	TN	0.044	YES
*	452	CN1CCCC1CCOC(C)(c1ccccc1)c1ccc(Cl)cc1	14.8738	1	0.652	0.348	TP	0.0297	YES
*	1998	Cc1cc(-n2c(=O)[nH]c(=O)n(C)c2=O)ccc1Oc1ccc(S(=O)(=O)C(F)(F)F)cc1	7.35899	0	0.3831	-0.3831	TN	3.0621	No
+	508	CCN(CC)Cc1cc(Nc2ccnc3cc(Cl)ccc23)ccc1O	17.9794	1	0.7631	0.2369	TP	0.0299	YES
*	3139	CN(C)c1cccc(-c2c3c(=O)n(-c4ccccc4Cl)[nH]c3cc(=O)n2C)c1	6.21263	0	0.3421	-0.3421	TN	0.0565	YES
+	510	COc1cc(C=CC(=O)C=C(O)C=Cc2ccc(O)c(OC)c2)ccc1O	8.35013	1	0.4186	0.5814	FN	0.0337	YES
*	2674	CCC(C)C(N)C(=O)O	-2.12859	0	0.0437	-0.0437	TN	0.0076	YES
*	532	COc1cc2c3cc1Oc1c(OC)c(OC)cc4c1C(Cc1ccc(O)c(c1)Oc1ccc(cc1)CC3N(C)CC2)N(C)CC4	24.7666	1	1.0059	-0.0059	TP	0.0638	YES
#	2735	O=C(c1ccc(C(=O)N2CCC(N3CCCC3)CC2)c(Nc2ccccc2)c1)N1CCC(N2CCCC2)CC1	9.53887	0	0.4611	-0.4611	TN	0.056	YES
-	533	COc1ccc2cc1Oc1ccc(cc1)CC1c3cc(c(OC)cc3CCN1C)Oc1c(OC)c(OC)cc3c1C(C2)N(C)CC3	20.8604	1	0.8661	0.1339	TP	0.0622	YES
+	2457	C=CC1CN2CCC1CC2C(O)c1ccnc2ccccc12	15.7921	0	0.6848	-0.6848	FP	0.0266	YES
*	538	Fc1ccc(C(c2ccc(F)cc2)N2CCN(CC=Cc3ccccc3)CC2)cc1	24.2413	1	0.9871	0.0129	TP	0.0501	YES
#	521	COc1ccc2c(c1OC)C(=O)OC2C1c2cc3c(cc2CCN1C)OCO3	4.39902	0	0.2772	-0.2772	TN	0.0357	YES
#	550	COc1cc2nc(N3CCN(C(=O)C4COc5ccccc5O4)CC3)nc(N)c2cc1OC	14.6317	1	0.6433	0.3567	TP	0.0893	YES
-	861	CC=Cc1ccc(OC)cc1	5.83339	0	0.3286	-0.3286	TN	0.0142	YES
-	582	C1CCC(C(CC2CCCCN2)C2CCCCC2)CC1	15.9038	1	0.6888	0.3112	TP	0.0215	YES
-	1473	OCC=Cc1ccccc1	4.98994	0	0.2984	-0.2984	TN	0.011	YES
+	584	CN1CCCN(C(c2ccccc2)c2ccc(Cl)cc2)CC1	19.9855	1	0.8348	0.1652	TP	0.0214	YES
-	3782	CC(=O)N1CCC(Nc2cc(C(=O)NCC(O)CN3CCc4ccccc4C3)ncn2)CC1	5.70332	0	0.3239	-0.3239	TN	0.0475	YES
+	592	CCN(CCCc1ccccc1)CCCc1ccccc1	17.31	1	0.7391	0.2609	TP	0.0204	YES
-	35	CC(C)NCC(O)COc1ccc(CC(N)=O)cc1	3.31802	0	0.2386	-0.2386	TN	0.0178	YES
#	596	CN1CCN(C2=Nc3ccccc3Oc3ccc(Cl)cc32)CC1	17.1635	1	0.7339	0.2661	TP	0.032	YES
-	1645	COc1cc(OC)c(NC(=O)Nc2cc(C)on2)cc1Cl	9.30739	0	0.4528	-0.4528	TN	0.0392	YES
#	597	O=C(c1ccc(F)cc1)C1CCN(CCn2c(=O)[nH]c3ccccc3c2=O)CC1	23.2434	1	0.9514	0.0486	TP	0.0421	YES
*	2228	Cn1cnc2c(F)c(Nc3ccc(Br)cc3Cl)c(C(=O)NOCCO)cc21	3.30914	0	0.2383	-0.2383	TN	4.0475	No
+	605	CCCCCC(=O)OC1(C(C)=O)CCC2C3CCC4=CC(=O)CCC4(C)C3CCC21C	5.23868	1	0.3073	0.6927	FN	0.0407	YES
+	2377	CCN(CC)CC(=O)Nc1c(C)cccc1C(=O)OC	0.13091	0	0.1246	-0.1246	TN	0.0166	YES
-	681	C=C1C(=O)OC2C1CCC(C)=CCCC1(C)OC21	16.6158	1	0.7143	0.2857	TP	0.0205	YES
*	2391	Cc1csc(NC(=O)c2sc3nc4c(c(C(F)(F)F)c3c2N)CCC4)n1	-3.55217	0	-0.0072	0.0072	TN	0.0686	YES
+	687	CNCCCCOc1ccccc1Cc1ccccc1	12.9707	1	0.5839	0.4161	TP	0.0174	YES
+	335	NC(Cc1ccc(O)c(O)c1)C(=O)O	0.61351	0	0.1418	-0.1418	TN	0.0172	YES
+	693	CCC(=C(c1ccccc1)c1ccc(OCCN(C)C)cc1)c1ccccc1	19.0267	1	0.8005	0.1995	TP	0.0333	YES
#	2250	O=c1ncn2nc(Sc3ccc(F)cc3F)ccc2c1-c1c(Cl)cccc1Cl	1.58681	0	0.1766	-0.1766	TN	0.0625	YES
-	695	Clc1ccc2c(c1)N=C(N1CCNCC1)c1ccccc1N2	19.6965	1	0.8245	0.1755	TP	0.0283	YES
#	2365	CCC(=O)Oc1ccc2c(c1)CCC1C2CCC2(C)C1CC(OC(=O)CC)C2OC(=O)CC	-3.10422	0	0.0088	-0.0088	TN	0.0328	YES
-	776	CCC(=C(CC)c1ccc(O)cc1)c1ccc(O)cc1	9.5705	1	0.4623	0.5377	FN	0.0234	YES
+	2490	Cc1cc(-c2ccc(CC(=O)Nc3ccc(-c4cccnc4)cc3)cc2)ccn1	7.59763	0	0.3917	-0.3917	TN	0.0543	YES
#	778	CCC1OC(=O)C(C)C(OC2CC(C)(OC)C(O)C(C)O2)C(C)C(OC2OC(C)CC(N(C)C)C2O)C(C)(O)CC(C)CN(C)C(C)C(O)C1(C)O	22.9352	1	0.9404	0.0596	TP	0.0692	YES
+	1233	CCCCC(CC)COC(=O)C=Cc1ccc(OC)cc1	5.63729	0	0.3215	-0.3215	TN	0.0218	YES
+	784	CC(=O)Oc1ccccc1C(=O)Nc1ncc([N+](=O)[O-])s1	7.49896	1	0.3881	0.6119	FN	0.0215	YES
*	3515	CNC1C(=O)NC2Cc3ccc(cc3)Oc3cc4cc(c3OC3OC(C(=O)O)C(O)C(O)C3NC(=O)CCCCCCCCC(C)C)Oc3ccc(cc3Cl)C(O)C3NC(=O)C(NC(=O)C4NC(=O)C(NC2=O)c2cc(cc(O)c2Cl)Oc2cc1ccc2O)c1ccc(O)c(c1)-c1c(OC2OC(CO)C(O)C(O)C2O)cc(O)cc1C(C(=O)NCCCN(C)C)NC3=O	25.5345	0	1.0334	-1.0334	FP	4.1875	No
#	785	Cc1c(O)cccc1C(=O)NC(CSc1ccccc1)C(O)CN1CC2CCCCC2CC1C(=O)NC(C)(C)C	24.2659	1	0.988	0.012	TP	0.051	YES
#	2675	NCC(=O)Nc1cncc(-c2nn3c(=O)cc(N4CCNCC4)nc3s2)c1	-0.35605	0	0.1071	-0.1071	TN	0.0602	YES
-	836	C=CC1CN2CCC1CC2C(O)c1ccnc2ccc(OC)cc12	15.6177	1	0.6786	0.3214	TP	0.0304	YES
-	2801	C#CCN(C)CC1=Cc2ccccc2Oc2ccccc21	11.3597	0	0.5263	-0.5263	FP	1.0298	No
+	858	Cc1ccc(-c2cc(C(F)(F)F)nn2-c2ccc(S(N)(=O)=O)cc2)cc1	13.2741	1	0.5948	0.4052	TP	3.0595	No
+	3207	O=C(O)CCCCN(CCc1ccccc1OCc1ccc(CCc2ccccc2)cc1)Cc1ccc(C(=O)O)cc1	15.0414	0	0.658	-0.658	FP	0.048	YES
-	966	CCCCC(CC)CN1CN(CC(CC)CCCC)CC(C)(N)C1	15.7598	1	0.6837	0.3163	TP	0.0231	YES
-	1282	CCC(C=CC1OC(=O)C=CC1C)=CC(C)CC=CC(C)=CC(C)C(=O)C(C)C(O)C(C)CC(C)=CC(=O)O	2.92296	0	0.2244	-0.2244	TN	0.0417	YES
#	994	N#Cc1ccc2c(c1)N(CCCN1CCC(O)CC1)c1ccccc1S2	19.0092	1	0.7999	0.2001	TP	0.0391	YES
-	2038	CC(=O)OC(C)OC(=O)C(C)c1ccc(-c2ccccc2)c(F)c1	5.1801	0	0.3052	-0.3052	TN	0.033	YES
#	1037	C=C1CCC2C(C)(CO)C(O)CCC2(C)C1CC=C1C(=O)OCC1O	22.0678	1	0.9093	0.0907	TP	0.0297	YES
-	64	CC(NC(C)(C)C)C(=O)c1cccc(Cl)c1	16.1649	0	0.6982	-0.6982	FP	0.0193	YES
-	1052	O=C(NC(=O)c1c(F)cccc1F)Nc1cc(Cl)c(OC(F)(F)C(F)C(F)(F)F)cc1Cl	16.8258	1	0.7218	0.2782	TP	0.0618	YES
+	141	Oc1ccc(C2CNCCc3c2cc(O)c(O)c3Cl)cc1	13.7782	0	0.6128	-0.6128	FP	3.0275	No
*	1075	Clc1ccc2c(c1)CCc1cccnc1C2=C1CCNCC1	22.186	1	0.9136	0.0864	TP	0.0226	YES
-	3704	CC#CC(=O)N1CCC(n2c(=O)n(-c3ccc(Oc4ccccc4)cc3)c3c(N)ncnc32)C1	3.02306	0	0.228	-0.228	TN	0.0746	YES
#	1080	O=C1Nc2ccc(Cl)cc2C(C#CC2CC2)(C(F)(F)F)O1	21.3238	1	0.8827	0.1173	TP	0.0451	YES
+	114	CN(C)CCOC(c1ccccc1)c1ccccc1	10.7777	0	0.5054	-0.5054	FP	0.0198	YES
*	1133	Cc1ccc(NC(=O)c2ccc(CN3CCN(C)CC3)cc2)cc1Nc1nccc(-c2cccnc2)n1	23.9564	1	0.9769	0.0231	TP	0.0513	YES
#	365	CCCCNc1ccc(C(=O)OCCOCCOCCOCCOCCOCCOCCOCCOCCOC)cc1	-3.65458	0	-0.0109	0.0109	TN	0.0288	YES
+	1144	CC(C)=CCOc1ccc(C=CC(=O)c2ccc(OCC=C(C)C)cc2OCC(=O)O)cc1	9.62011	1	0.464	0.536	FN	1.0355	No
+	2274	CS(=O)(=O)c1ccc(C(=O)Nc2ccc(Cl)c(-c3ccccn3)c2)c(Cl)c1	9.13535	0	0.4467	-0.4467	TN	0.0406	YES
#	1158	O=C1CCc2ccc(OCCCCN3CCN(c4cccc(Cl)c4Cl)CC3)cc2N1	36.4342	1	1.4233	-0.4233	TP	0.045	YES
+	3584	OCC1OC(Oc2c(O)cc(O)cc2C=Cc2ccc(O)cc2)C(O)C(O)C1O	3.64434	0	0.2503	-0.2503	TN	0.039	YES
#	1163	Cc1ccc(O)c(C(CCN(C(C)C)C(C)C)c2ccccc2)c1	16.9019	1	0.7245	0.2755	TP	0.0278	YES
+	2013	O=C(Cn1cnnn1)NC1C(=O)N2C(C(=O)O)=C(CSc3nncs3)CSC12	-7.72297	0	-0.1564	0.1564	TN	3.0634	No
*	1167	CC1(CN2CCC(n3c(=O)[nH]c4ccccc43)CC2)OCc2ccccc2-n2cccc21	11.6685	1	0.5373	0.4627	TP	3.0603	No
*	921	Nc1ncnc2c1ncn2C1OC2COP(=O)(O)OC2C1O	-3.19717	0	0.0055	-0.0055	TN	0.0393	YES
#	1169	O=C(C=Cc1ccccc1)NC(NC(=S)Nc1cccc2cccnc12)C(Cl)(Cl)Cl	27.8139	1	1.1149	-0.1149	TP	0.0488	YES
#	1183	N=C(N)Nc1ccc(C(=O)Oc2ccc3cc(C(=N)N)ccc3c2)cc1	-1.68478	0	0.0596	-0.0596	TN	0.0388	YES
#	1172	COc1cc2c(Nc3ccc(NC(=O)c4ccccc4)cc3)ncnc2cc1OCCCN1CCOCC1	11.2533	1	0.5225	0.4775	TP	0.0588	YES
+	3388	Cc1nn(C)c(COc2ccc(N3CCN(S(=O)(=O)N(C)C)CC3)cc2)c1-c1cccc2c(CCCOc3cccc4ccccc34)c(C(=O)O)n(CCN3CCOCC3)c12	5.97941	0	0.3338	-0.3338	TN	0.0989	YES
-	1239	O=[N+]([O-])c1ccc(O)c2ncccc12	11.7653	1	0.5408	0.4592	TP	0.02	YES
-	3639	COc1ccc(CN(C(=O)C(N)Cc2c(C)cc(C(N)=O)cc2C)C(C)c2nc(-c3ccccc3)c[nH]2)cc1C(=O)O	9.19479	0	0.4488	-0.4488	TN	0.0572	YES
#	1254	COc1ccc2cc1Oc1ccc(cc1)CC1c3c(cc4c(c3Oc3cc5c(cc3OC)CCN(C)C5C2)OCO4)CCN1C	27.3524	1	1.0984	-0.0984	TP	0.1048	YES
-	3825	O=C1OC(COc2ccccc2[N+](=O)[O-])CC1Cc1ccccc1	9.36021	0	0.4547	-0.4547	TN	0.0231	YES
-	1260	CCCCC(C=O)NC(=O)C(CC(C)C)NC(=O)C(CC(C)C)NC(C)=O	8.46697	1	0.4228	0.5772	FN	0.0254	YES
+	2960	O=C1NCCc2[nH]c(-c3ccncc3)cc21	10.9512	0	0.5116	-0.5116	FP	0.0253	YES
#	1264	O=S(=O)(NCCNCC=Cc1ccc(Br)cc1)c1cccc2cnccc12	29.6867	1	1.1819	-0.1819	TP	0.0431	YES
-	911	CNC1CCC(c2ccc(Cl)c(Cl)c2)c2ccccc21	10.4944	0	0.4953	-0.4953	TN	0.0205	YES
*	1272	COCCOC(=O)C1=C(C)NC(C)=C(C(=O)OCC=Cc2ccccc2)C1c1cccc([N+](=O)[O-])c1	16.1817	1	0.6988	0.3012	TP	0.0398	YES
*	1471	Cc1ccccc1N=Nc1ccc(N/N=C2/C(=O)C=Cc3ccccc32)c(C)c1	15.705	0	0.6817	-0.6817	FP	0.0501	YES
-	1277	CC(C)c1ccc2c(c1)c(SC(C)(C)C)c(CC(C)(C)C(=O)O)n2Cc1ccc(Cl)cc1	13.6349	1	0.6077	0.3923	TP	0.0555	YES
#	1416	NCCCC(O)(P(=O)(O)O)P(=O)(O)O	9.93244	0	0.4752	-0.4752	TN	0.0262	YES
*	1290	CN1CCCCC1CCN1c2ccccc2Sc2ccc(S(C)=O)cc21	18.0514	1	0.7657	0.2343	TP	0.0403	YES
#	430	Cc1cccc(N(C)C(=S)Oc2ccc3ccccc3c2)c1	2.61651	0	0.2135	-0.2135	TN	0.0321	YES
-	1292	CN1CCC(=C2c3ccccc3CCc3sccc32)CC1	18.3656	1	0.7769	0.2231	TP	0.0416	YES
+	2575	Cc1ccnc(NS(=O)(=O)c2ccc(NC(=O)Nc3ccc(S(=O)(=O)Nc4nccc(C)n4)cc3)cc2)n1	5.38344	0	0.3125	-0.3125	TN	5.0665	No
+	1299	CCCCC(C=O)NC(=O)C(CC(C)C)NC(=O)OCc1ccccc1	7.24563	1	0.3791	0.6209	FN	0.0276	YES
-	3042	CCc1cc(C(C)=NOCc2ccc(C3CCCCC3)c(C(F)(F)F)c2)ccc1CN1CC(C(=O)O)C1	7.34621	0	0.3827	-0.3827	TN	0.0589	YES
+	1306	COc1ccc2c(c1)c(C1=C(c3c[nH]c4ccccc34)C(=O)NC1=O)cn2CCCN(C)C	17.4646	1	0.7447	0.2553	TP	0.0557	YES
#	1215	CC(O)C1CCC2C3CCC4CC(O)CCC4(C)C3CCC12C	-1.86636	0	0.0531	-0.0531	TN	0.0316	YES
+	1332	CC(C)(C)CC(C)(C)c1ccc(O)cc1	14.83	1	0.6504	0.3496	TP	0.0219	YES
#	2551	CCn1c(-c2nonc2N)nc2c(C#CC(C)(C)O)ncc(OCC3CCCNC3)c21	8.45816	0	0.4225	-0.4225	TN	0.0767	YES
+	1349	O[n+]1ccccc1SSc1cccc[n+]1O	11.1435	1	0.5185	0.4815	TP	5.0127	No
-	1971	S=C(SSC(=S)N1CCCCC1)N1CCCCC1	6.21127	0	0.3421	-0.3421	TN	1.0316	No
*	1360	COc1ccc(CN2CCN(C(c3ccc(F)cc3)c3ccc(F)cc3)CC2)c(OC)c1OC	19.8875	1	0.8313	0.1687	TP	0.0623	YES
#	747	O=P(O)(O)CP(=O)(O)O	5.21845	0	0.3066	-0.3066	TN	0.0151	YES
-	1372	CNCCC(Oc1cccc2ccccc12)c1cccs1	11.016	1	0.514	0.486	TP	0.025	YES
*	76	NC(CO)C(=O)NNCc1ccc(O)c(O)c1O	-2.7703	0	0.0208	-0.0208	TN	1.0227	No
-	1381	Cc1cccc(C)c1OCC(=O)NC(Cc1ccccc1)C(O)CC(Cc1ccccc1)NC(=O)C(C(C)C)N1CCCNC1=O	14.4195	1	0.6357	0.3643	TP	0.0533	YES
+	1771	CCNC1CC(N)C(OC2OC(CN)=CCC2N)C(O)C1OC1OCC(C)(O)C(NC)C1O	8.2431	0	0.4148	-0.4148	TN	0.0484	YES
+	1421	CCOC(=O)C(CCc1ccccc1)NC1CCc2ccccc2N(CC(=O)O)C1=O	11.2905	1	0.5238	0.4762	TP	0.0326	YES
*	79	CC(C)(Oc1ccc(C2CC2(Cl)Cl)cc1)C(=O)O	4.02591	0	0.2639	-0.2639	TN	0.0208	YES
#	1425	NC(=O)c1ccc2nc(-c3ccc(Oc4ccc(Cl)cc4)cc3)[nH]c2c1	10.3883	1	0.4915	0.5085	FN	0.0495	YES
#	881	CC12CCC(CC1)C(C)(C)O2	7.15359	0	0.3758	-0.3758	TN	0.018	YES
*	1442	COc1cccc2c1CCCC2CCCN1CCN(C2CCCCC2)CC1	15.7797	1	0.6844	0.3156	TP	0.0271	YES
+	1038	CC1CCC(C(C)C)C(=O)C1	5.60275	0	0.3203	-0.3203	TN	0.0087	YES
*	1445	Fc1ccc(Cl)cc1-c1nc(Nc2ccncc2)c2nccnc2n1	15.4383	1	0.6722	0.3278	TP	0.0425	YES
*	3285	O=C(O)C1OC(Oc2cc3oc(-c4ccccc4)cc(O)c-3c(=O)c2O)C(O)C(O)C1O	-13.3999	0	-0.3595	0.3595	TN	1.0635	No
#	1446	Cc1[nH]c(C=C2C(=O)Nc3ccc(S(=O)(=O)N(C)c4cccc(Cl)c4)cc32)c(C)c1C(=O)N1CCN(C)CC1	13.5395	1	0.6042	0.3958	TP	0.0729	YES
+	2798	Cn1cc(-c2ccc3c(c2)CCN3C(=O)Cc2cccc(C(F)(F)F)c2)c2c(N)ncnc21	3.98483	0	0.2624	-0.2624	TN	0.0573	YES
#	1452	CCOC(=O)C1C(=COCCN)NC(C)=C(C(=O)OC)C1c1ccccc1Cl	12.6161	1	0.5712	0.4288	TP	0.0348	YES
+	901	Cc1cc(SCc2sc(-c3ccc(C(F)(F)F)c(F)c3)nc2C)ccc1OCC(=O)O	2.86342	0	0.2223	-0.2223	TN	1.0657	No
+	1502	O=[N+]([O-])c1cc(I)c(O)c(I)c1	10.8476	1	0.5079	0.4921	TP	0.0568	YES
-	2768	O=C1NC(O)CCN1C1OC(CO)C(O)C1O	-2.76432	0	0.021	-0.021	TN	1.0209	No
-	1531	CCOC(=O)C1OC1C(=O)NC(CC(C)C)C(=O)NCCC(C)C	5.73933	1	0.3252	0.6748	FN	0.0216	YES
+	3761	O=C(O)CNC(=O)c1ncc(-c2cccc(Cl)c2)cc1O	4.92914	0	0.2962	-0.2962	TN	0.0276	YES
+	1558	C#CC1(O)CCC2C3CCC4=CCCCC4C3C(=C)CC21CC	14.7353	1	0.647	0.353	TP	0.042	YES
-	1095	Cc1ccc(C(C)C)c(O)c1	3.06368	0	0.2295	-0.2295	TN	0.0143	YES
-	1570	C=C1C(=CC=C2CCCC3(C)C2CCC3C(C)C=CC(O)C2CC2)CC(O)CC1O	17.1757	1	0.7343	0.2657	TP	0.0397	YES
#	3678	Cc1c(-c2c(-c3ccc(F)o3)sc3ncnc(OC(Cc4ccccc4OCc4ccnn4CC(F)(F)F)C(=O)O)c23)ccc(OCCN2CCN(C)CC2)c1Cl	12.9731	0	0.584	-0.584	FP	0.1281	YES
#	1585	CNC(=O)c1cc(Oc2ccc(NC(=O)Nc3ccc(Cl)c(C(F)(F)F)c3)cc2)ccn1	13.9888	1	0.6203	0.3797	TP	0.0481	YES
-	3828	CCN(C(=O)c1ccccc1OC)c1cc2c(cc1N1CCNCC1C)n(C)c(=O)n2C	6.90844	0	0.367	-0.367	TN	0.0469	YES
-	1586	COc1cccc(CCc2ccccc2OCC(CN(C)C)OC(=O)CCC(=O)O)c1	10.865	1	0.5086	0.4914	TP	1.0285	No
-	3529	CNC(C)C(=O)NC1C(=O)N(Cc2c(C)ccc3ccccc23)c2ccc(C#N)cc2N(C(C)=O)C1C	13.5409	0	0.6043	-0.6043	FP	0.0585	YES
-	1589	COC(=O)C1=C(C)NC(C)=C(C(=O)OC(C)(C)CN(C)CCC(c2ccccc2)c2ccccc2)C1c1cccc([N+](=O)[O-])c1	31.3707	1	1.2421	-0.2421	TP	0.0535	YES
#	3105	CN(C)CC(=O)Nc1ccc2[nH]c(=O)c3ccccc3c2c1	1.81723	0	0.1849	-0.1849	TN	0.0241	YES
#	1590	COC(=O)C1=C(C)NC(C)=C(C(=O)OCCN2CCN(C(c3ccccc3)c3ccccc3)CC2)C1c1cccc([N+](=O)[O-])c1	23.8831	1	0.9743	0.0257	TP	0.0631	YES
+	2339	CNC(=O)c1cnn(-c2nc(N)c3ncn(C4OC(CO)C(O)C4O)c3n2)c1	-16.0937	0	-0.4559	0.4559	TN	0.069	YES
#	1598	CS(=O)(=O)CCNCc1ccc(-c2ccc3ncnc(Nc4ccc(OCc5cccc(F)c5)c(Cl)c4)c3c2)o1	27.0779	1	1.0886	-0.0886	TP	0.1307	YES
#	1813	CC1CCC2C(C)C3C(CC4C5CC=C6CC(OC7OC(CO)C(O)C(OC8OC(CO)C(O)C(O)C8O)C7OC7OC(C)C(O)C(O)C7O)CCC6(C)C5CCC43C)N2C1	-7.19436	0	-0.1375	0.1375	TN	0.0724	YES
#	1638	CCN(CC)CCCN(c1ccccc1)C1Cc2ccccc2C1	18.2257	1	0.7719	0.2281	TP	0.0227	YES
*	833	Nc1nccs1	-0.82447	0	0.0904	-0.0904	TN	0.0087	YES
*	1642	CC(C)c1onc(-c2c(Cl)cccc2Cl)c1COc1ccc(C=Cc2cccc(C(=O)O)c2)c(Cl)c1	23.0092	1	0.943	0.057	TP	0.0557	YES
*	2173	CON=C(C(=O)NC1C(=O)N2C(C(=O)OC(C)OC(C)=O)=C(COC(N)=O)CSC12)c1ccco1	-26.5492	0	-0.8299	0.8299	TN	0.0577	YES
-	1646	COc1cc(C(C)C)c2c(c1)S(=O)(=O)N(COc1cc(=O)n3cccc(OCCN4CCCCC4)c3n1)C2=O	21.1929	1	0.878	0.122	TP	1.0688	No
*	1782	CCC(=O)OC1(C(=O)SCF)C(C)CC2C3CC(F)C4=CC(=O)C=CC4(C)C3(F)C(O)CC21C	-6.86635	0	-0.1258	0.1258	TN	2.0575	No
+	1647	O=C(c1ccc(Nc2nccc(-c3cc4ccccc4s3)n2)cc1)N1CCC(N2CCCC2)CC1	26.7279	1	1.0761	-0.0761	TP	4.0641	No
#	912	CC1C2CCC3C4CC=C5CC(N(C)C)CCC5(C)C4CCC32CN1C	12.2883	0	0.5595	-0.5595	FP	0.0519	YES
+	1682	N#CC(c1ccc(Cl)cc1)c1c(Cl)cc(-n2ncc(=O)[nH]c2=O)cc1Cl	23.8214	1	0.9721	0.0279	TP	3.0476	No
#	963	CC(=O)Nc1cc([As](=O)(O)O)ccc1O	-10.8905	0	-0.2697	0.2697	TN	0.0132	YES
*	1691	CN1CCCC(n2nc(Cc3ccc(Cl)cc3)c3ccccc3c2=O)CC1	24.3545	1	0.9911	0.0089	TP	0.0434	YES
-	3571	CNCCN(C)Cc1c[nH]nc1-c1ccc(OC2CC(OCCC3CCOCC3)C2)cc1	4.25526	0	0.2721	-0.2721	TN	0.0377	YES
-	1699	Clc1ccc(C(OCCN2CCCCC2)c2ccccc2)cc1	14.8411	1	0.6508	0.3492	TP	0.0264	YES
*	3197	Cc1cc(N2CCN(C3CNC(C(=O)N4CCSC4)C3)CC2)n(-c2ccccc2)n1	0.01	0	0.1202	-0.1202	TN	0.0659	YES
*	1704	CCN(CC)CCOC(=O)C(Cc1cccc2ccccc12)CC1CCCO1	9.78	1	0.4698	0.5302	FN	0.0288	YES
*	60	CN(C)c1nc(N(C)C)nc(N(C)C)n1	-0.73557	0	0.0936	-0.0936	TN	0.0223	YES
+	1726	CN(Cc1cc(Br)cc(Br)c1N)C1CCCCC1	20.9355	1	0.8688	0.1312	TP	0.0261	YES
+	2200	Oc1ccc2ccccc2c1SSc1c(O)ccc2ccccc12	15.4934	0	0.6741	-0.6741	FP	3.0248	No
#	1738	CC(CN(C)C)CN1c2ccccc2Sc2ccccc21	20.1609	1	0.8411	0.1589	TP	0.0318	YES
*	2109	CCN(CC)CCOC(=O)c1ccc(N)cc1Cl	3.88819	0	0.259	-0.259	TN	0.0194	YES
#	1754	CCN(CC)C(C)CN1c2ccccc2Sc2ccccc21	19.5778	1	0.8203	0.1797	TP	0.0317	YES
+	1641	NCCNC(=O)c1ccc(Cl)cn1	12.6596	0	0.5728	-0.5728	FP	0.0129	YES
#	1798	COc1ccc2c(c1)N(CC(C)CN(C)C)c1ccccc1S2	21.0309	1	0.8722	0.1278	TP	0.029	YES
-	1193	CCOC(=O)Cc1ccc(-c2ccccc2)cc1	6.14406	0	0.3397	-0.3397	TN	0.0204	YES
#	1800	CN1CCN(C(c2ccccc2)c2ccc(Cl)cc2)CC1	19.4205	1	0.8146	0.1854	TP	0.0207	YES
*	139	O=c1[nH]cc(F)c(=O)[nH]1	-1.24056	0	0.0755	-0.0755	TN	0.0203	YES
*	1830	CC1CC2C3CCC4=CC(=O)C=CC4(C)C3(Cl)C(O)CC2(C)C1(OC(=O)c1ccco1)C(=O)CCl	11.1665	1	0.5194	0.4806	TP	0.0554	YES
#	2639	CCN1CCN(C(=O)NC(C(=O)NC2C(=O)N3C2SC(C)(C)C3C(=O)O)c2ccccc2)C(=O)C1=O	1.66967	0	0.1796	-0.1796	TN	0.0431	YES
*	1846	CN1CCN(CCCN2c3ccccc3Sc3ccc(S(=O)(=O)N(C)C)cc32)CC1	14.5838	1	0.6416	0.3584	TP	0.0472	YES
+	1713	CCCC(=O)Nc1ncnc2c1ncn2C1OC2COP(=O)(O)OC2C1OC(=O)CCC	-10.5556	0	-0.2577	0.2577	TN	0.0465	YES
#	1854	C#CC1(O)CCC2C3CCC4=Cc5oncc5CC4(C)C3CCC21C	26.3403	1	1.0622	-0.0622	TP	0.0803	YES
*	1376	Nc1nc(=O)n(C2CSC(CO)O2)cc1F	-0.37504	0	0.1065	-0.1065	TN	0.0321	YES
-	1857	C#CC1(O)CCC2C3CCC4=CCCCC4C3CCC21C	15.0721	1	0.6591	0.3409	TP	0.039	YES
-	3430	CCOc1cc(C(CS(C)(=O)=O)N2C(=O)c3cccc(NC(C)=O)c3C2=O)ccc1OC	6.96063	0	0.3689	-0.3689	TN	0.0552	YES
+	1864	CCC1CN2CCC1CC2C(O)c1ccnc2ccc(OC)cc12	13.9827	1	0.6201	0.3799	TP	0.0292	YES
#	3686	CCN1CCN(C(=O)NC(C(=O)NC2(OC)C(=O)N3C(C(=O)O)=C(CSc4nnnn4C)CSC32)C(C)O)C(=O)C1=O	-1.99406	0	0.0485	-0.0485	TN	0.0732	YES
+	1898	CN(C)CCC=C1c2ccccc2C(C)(C)c2ccccc21	18.6201	1	0.786	0.214	TP	0.0269	YES
*	2154	N=C(N)NCCCCCCC(=O)NC(O)C(=O)NCCCCNCCCN	8.73153	0	0.4322	-0.4322	TN	0.0247	YES
-	1904	Cc1cc(O)c2c(c1)OC1(C)CCC3C(C)(C)CCCC34COC2C14	16.6042	1	0.7139	0.2861	TP	0.0395	YES
*	3629	Nc1ccn(C2C(F)=C(CO)C(O)C2O)c(=O)n1	-10.5119	0	-0.2562	0.2562	TN	0.0325	YES
#	1907	CCCOC(C(=O)OC1CCN(C)CC1)(c1ccccc1)c1ccccc1	14.3475	1	0.6332	0.3668	TP	0.0331	YES
+	1263	OCCN1CCN(CCCN2c3ccccc3C=Cc3ccccc32)CC1	22.6959	0	0.9318	-0.9318	FP	0.0438	YES
-	1930	CC(CN(C)C)CN1c2ccccc2Sc2ccc(C(F)(F)F)cc21	21.6109	1	0.893	0.107	TP	0.0467	YES
#	1982	CCOC(=O)c1ncn2c1CN(C)C(=O)c1c(I)cccc1-2	-7.1118	0	-0.1345	0.1345	TN	0.0544	YES
#	1983	CC(C(O)c1ccccc1)N(C)CCOC(c1ccccc1)c1ccccc1	17.5979	1	0.7494	0.2506	TP	0.0309	YES
*	113	C[N+](C)(C)CCCCCCCCCC[N+](C)(C)C	8.95139	0	0.4401	-0.4401	TN	0.0184	YES
+	2007	Cc1c(-c2ccc(O)cc2)n(Cc2ccc(OCCN3CCCCCC3)cc2)c2ccc(O)cc12	22.9976	1	0.9426	0.0574	TP	0.0464	YES
+	2931	O=C(NC1CCOCC1)c1ccc(-c2cc(-c3c[nH]nc3-c3ccccn3)ccn2)cc1	2.12119	0	0.1958	-0.1958	TN	0.0529	YES
-	2022	CN(C)CCOC1=Cc2ccccc2Sc2ccc(Cl)cc21	18.8436	1	0.794	0.206	TP	0.0321	YES
-	3694	O=C(Nc1cccc(C(F)(F)F)c1)c1cccc2cc(Oc3cc(CO)ncn3)ccc12	7.43161	0	0.3857	-0.3857	TN	0.0533	YES
#	2024	Cn1nnnc1Sc1ncnc2scc(-c3cccc(S(C)(=O)=O)c3)c12	16.2011	1	0.6995	0.3005	TP	0.0613	YES
+	238	CN1C(C(=O)Nc2ccccn2)=C(O)c2ccccc2S1(=O)=O	-4.82746	0	-0.0528	0.0528	TN	2.0319	No
+	2041	CC1CC2C3CCC4=CC(=O)C=CC4(C)C3C(=O)CC2(C)C1(O)C(=O)CO	8.15663	1	0.4117	0.5883	FN	0.0388	YES
-	3775	COC(=O)N(CC(=O)O)Cc1cccc(OCc2nc(-c3ccc(Cl)cc3)oc2C)c1	3.96827	0	0.2618	-0.2618	TN	2.0515	No
*	2074	O=C(CCC1CCN(Cc2ccccc2)CC1)c1ccc2c(c1)NCCCC2	29.0412	1	1.1588	-0.1588	TP	0.0309	YES
-	1979	Cc1ccc(Nc2c(F)cccc2Cl)c(CC(=O)O)c1	4.37065	0	0.2762	-0.2762	TN	0.0298	YES
#	2086	CCCN(CCC)C(=O)C(CCC(=O)OCCCN1CCN(CCOC(=O)Cc2c(C)n(C(=O)c3ccc(Cl)cc3)c3ccc(OC)cc23)CC1)NC(=O)c1ccccc1	25.8422	1	1.0444	-0.0444	TP	0.0701	YES
-	1146	O=C(O)CNC(=O)c1ccccc1	2.7242	0	0.2173	-0.2173	TN	0.0135	YES
+	2124	COc1cc(O)c2c(c1)C1OC1CC(O)C(O)C(=O)C=CCC(C)OC2=O	10.9878	1	0.513	0.487	TP	0.0307	YES
*	2184	O=C(O)CSCC(=O)NC1CCSC1=O	-14.8442	0	-0.4112	0.4112	TN	0.0211	YES
+	2127	CN(C)CCCNC(=O)c1ccc(-c2cc(O)c3ncccc3c2)cc1	19.5176	1	0.8181	0.1819	TP	0.034	YES
*	3516	NC(CC1c2ccccc2Oc2ccccc21)(C(=O)O)C1CC1C(=O)O	0.96352	0	0.1543	-0.1543	TN	1.027	No
-	2129	COC(=O)C1=C(C)NC(COC(N)=O)=C(C(=O)OC(C)C)C1c1cccc(Cl)c1Cl	9.60446	1	0.4635	0.5365	FN	0.0402	YES
+	923	CC=CCC(C)C(O)C1C(=O)NC(CC)C(=O)N(C)CC(=O)N(C)C(CC(C)C)C(=O)NC(C(C)C)C(=O)N(C)C(CC(C)C)C(=O)NC(C)C(=O)NC(C)C(=O)N(C)C(CC(C)C)C(=O)N(C)C(CC(C)C)C(=O)N(C)C(C(C)C)C(=O)N1C	10.0426	0	0.4791	-0.4791	TN	0.0847	YES
*	2134	O=C(CCCN1CCN(c2ccc(F)cc2)CC1)NC1c2ccccc2CSc2ccccc21	26.7485	1	1.0768	-0.0768	TP	0.0528	YES
*	1269	NC(=O)c1ccc2[nH]ccc2c1	3.61729	0	0.2493	-0.2493	TN	0.01	YES
*	2145	CCN1CCN(c2cc(-c3ccc(F)cc3)c3c(n2)CCCCCC3)CC1	17.9269	1	0.7612	0.2388	TP	0.0462	YES
*	1617	CCCc1nc(C)c2c(=O)nc(-c3cc(S(=O)(=O)N4CCN(CC)CC4)ccc3OCC)[nH]n12	6.82638	0	0.3641	-0.3641	TN	0.0645	YES
+	2181	COC1C(OC(C)=O)CC(=O)OC(C)CC=CC=CC(OC2CCC(N(C)C)C(C)O2)C(C)CC(CC=O)C1OC1OC(C)C(OC2CC(C)(O)C(O)C(C)O2)C(N(C)C)C1O	23.8178	1	0.9719	0.0281	TP	0.0747	YES
*	491	COc1ccc2nc(S(=O)Cc3ncc(C)c(OC)c3C)[nH]c2c1	5.08465	0	0.3018	-0.3018	TN	0.0425	YES
-	2190	CCc1ccc(C=C2SC(=S)NC2=O)cc1	18.5519	1	0.7836	0.2164	TP	0.0343	YES
-	2596	CN(C)CCC=C1c2ccccc2COc2ccc(CC(=O)O)cc21	9.44098	0	0.4576	-0.4576	TN	0.0255	YES
*	2210	COc1cc(F)c(F)c(Nc2ccc(I)cc2F)c1NS(=O)(=O)C1(CC(O)CO)CC1	13.5568	1	0.6049	0.3951	TP	3.0718	No
-	530	CCN1CC2(COC)C(O)CC(OC)C34C5CC6(O)C(OC)C(O)C(OC(C)=O)(C5C6OC(=O)c5ccccc5)C(C(OC)C23)C14	8.72428	0	0.432	-0.432	TN	0.1165	YES
-	2223	COc1cc(C(C)=O)ccc1OCCCN1CCC(c2noc3cc(F)ccc23)CC1	11.1513	1	0.5188	0.4812	TP	0.0512	YES
-	706	CCCN1CCOC2c3cc(O)ccc3OCC21	7.60234	0	0.3918	-0.3918	TN	0.0254	YES
#	2224	Cc1ccc(Nc2nccc(N(C)c3ccc4c(C)n(C)nc4c3)n2)cc1S(N)(=O)=O	20.0471	1	0.837	0.163	TP	0.0653	YES
+	2327	Cc1ccc(-n2c(C)cc(-c3nnc4n3CCCCC4)c2C)cc1	1.07666	0	0.1584	-0.1584	TN	4.0479	No
#	2236	O=C(Nc1ccc(F)c(C(F)(F)F)c1)Nc1nnc(-c2ccncc2)s1	20.1732	1	0.8416	0.1584	TP	0.055	YES
*	1535	FCOC(C(F)(F)F)C(F)(F)F	2.43865	0	0.2071	-0.2071	TN	1.0272	No
-	2238	COc1cc(C)c(Sc2cnc(NC(=O)c3ccc(CNC(C)C(C)(C)C)cc3)s2)cc1C(=O)N1CCN(C(C)=O)CC1	16.8032	1	0.721	0.279	TP	1.0707	No
#	3002	O=S(=O)(CC1CS1)c1ccc(Oc2ccccc2)cc1	-1.41201	0	0.0694	-0.0694	TN	0.0328	YES
*	2242	Cn1cc(C2=C(c3cn(C4CCN(Cc5ccccn5)CC4)c4ccccc34)C(=O)NC2=O)c2ccccc21	26.8523	1	1.0805	-0.0805	TP	0.1085	YES
#	373	CN1C(=O)OC(C)(C)C1=O	3.93338	0	0.2606	-0.2606	TN	0.0141	YES
#	2247	Cc1ccc(NC(=O)c2ccc(CN3CCN(C)CC3)cc2)cc1Nc1nc(-c2cccnc2)cs1	28.7891	1	1.1498	-0.1498	TP	0.0483	YES
#	710	CC(=O)C(C#N)C(=O)Nc1cc(Br)ccc1Br	4.42002	0	0.278	-0.278	TN	0.0326	YES
#	2251	OCCC#Cc1nc(-c2ccc(F)cc2)c(-c2ccncc2)n1CCCc1ccccc1	24.5767	1	0.9991	0.0009	TP	0.0614	YES
-	2766	CN(CC(=O)N(Cc1ccc(C2CCCCC2)cc1)c1ccc(C(=O)O)c(O)c1)S(=O)(=O)c1c(F)c(F)c(F)c(F)c1F	6.10418	0	0.3383	-0.3383	TN	0.0763	YES
*	2270	CCN(CC)CCOc1ccc(Nc2ncc3cc(-c4c(Cl)cccc4Cl)c(=O)n(C)c3n2)cc1	24.6691	1	1.0024	-0.0024	TP	0.0651	YES
*	893	O=C(O)c1ccc2cc(-c3ccc(O)c(C45CC6CC(CC(C6)C4)C5)c3)ccc2c1	12.2626	0	0.5586	-0.5586	FP	0.0642	YES
#	2273	CC(C)(C)c1cc(NC(=O)Nc2ccc(-c3cn4c(n3)sc3cc(OCCN5CCOCC5)ccc34)cc2)no1	24.1682	1	0.9845	0.0155	TP	0.098	YES
*	215	CC(Cc1ccc(O)c(O)c1)C(C)Cc1ccc(O)c(O)c1	6.04374	0	0.3361	-0.3361	TN	0.0289	YES
*	2279	CC(=O)OCC(=O)C1(O)C(C)CC2C3C=C(C)C4=Cc5c(cnn5-c5ccccc5)CC4(C)C3C(O)CC21C	23.3015	1	0.9535	0.0465	TP	0.1289	YES
+	2034	N#CC(=C1SCC(c2ccc(Cl)cc2Cl)S1)n1ccnc1	-1.36086	0	0.0712	-0.0712	TN	2.0426	No
-	2289	CCOC(=O)c1c(CSc2ccccc2)n(C)c2cc(Br)c(O)c(CN(C)C)c12	14.7436	1	0.6473	0.3527	TP	0.0498	YES
#	2402	CC1(c2nc3cccc(C(N)=O)c3[nH]2)CCCN1	1.75502	0	0.1827	-0.1827	TN	0.0271	YES
+	2298	COc1ccc2cc1Oc1ccc(cc1)CC1c3cc(c(OC)cc3CCN1C)Oc1c(O)c(OC)cc3c1C(C2)N(C)CC3	20.6852	1	0.8599	0.1401	TP	0.0606	YES
+	1706	COc1ccc(OC)c(C(O)CNC(=O)CN)c1	5.4919	0	0.3163	-0.3163	TN	0.021	YES
-	2300	CC(=O)ON=C1C(=O)N(Cc2cc(Cl)ccc2Cl)c2ccc(Cl)cc21	9.601	1	0.4633	0.5367	FN	0.0298	YES
+	2895	COc1cccc(Nc2c(C(N)=O)cnc3c(C)cc(S(=O)(=O)c4cccc(C(=O)N(C)C)c4)cc23)c1	10.3773	0	0.4911	-0.4911	TN	0.069	YES
-	2304	COc1c(C)cnc(Cn2cnc3c(Cl)nc(N)nc32)c1C	14.815	1	0.6499	0.3501	TP	0.0329	YES
*	1477	CCCCCCCCCCCC(=O)O[Sn](CCCC)(CCCC)OC(=O)CCCCCCCCCCC	8.99745	0	0.4418	-0.4418	TN	0.0267	YES
-	2305	CCNC(=O)c1noc(-c2cc(C(C)C)c(O)cc2O)c1-c1ccc(CN2CCOCC2)cc1	16.4027	1	0.7067	0.2933	TP	1.0586	No
#	1572	CC(=O)OC1CC2CCC3C(CCC4(C)C3CC([N+]3(C)CCCCC3)C4OC(C)=O)C2(C)CC1N1CCCCC1	-1.26862	0	0.0745	-0.0745	TN	0.0572	YES
*	2307	O=C(NC(c1ccccc1)C1CCCCN1)c1cccc(C(F)(F)F)c1Cl	17.1989	1	0.7352	0.2648	TP	0.0434	YES
#	2522	CNC(=O)c1ccc(N2C(=S)N(c3ccc(C#N)c(C(F)(F)F)c3)C(=O)C23CCC3)cc1F	0.23962	0	0.1284	-0.1284	TN	0.0791	YES
-	2321	Cc1ccc(C(=O)Nc2cccc(C(F)(F)F)c2)cc1Nc1nc(-c2cccnc2)nc2c1cnn2C	16.1799	1	0.6987	0.3013	TP	0.0594	YES
-	2620	CN1CCc2c(c3ccccc3n2Cc2ccc(C(=O)NO)cc2)C1	11.248	0	0.5223	-0.5223	FP	1.0348	No
+	2326	O=C(Nc1ccc(S(=O)(=O)N2CCOCC2)cc1)c1cc(Cl)ccc1NS(=O)(=O)c1ccc(Cl)s1	15.6069	1	0.6782	0.3218	TP	4.057	No
*	1327	CC1(C)SC2C(NC(=O)COc3ccccc3)C(=O)N2C1C(=O)O	5.0019	0	0.2988	-0.2988	TN	0.0391	YES
+	2338	CN(C)CCOC(c1ccccc1)c1ccc(Br)cc1	15.3696	1	0.6697	0.3303	TP	0.025	YES
+	3854	OC(CCN1CCCCC1)(c1ccccc1)C1CCCC1	9.90183	0	0.4741	-0.4741	TN	0.0257	YES
-	2361	CN(C)CCCOC1(Cc2ccccc2)CCCCCC1	19.3752	1	0.813	0.187	TP	0.0177	YES
-	1897	O=C(OCCN1CCCCC1)C(O)(c1ccccc1)c1ccccc1	9.61562	0	0.4639	-0.4639	TN	0.0307	YES
+	2392	CN1CCN(c2cc(C(=O)Nc3ccc4c(c3)-c3c(c(C(N)=O)nn3-c3ccc(F)cc3)CC4)c(Cl)cn2)CC1	18.7366	1	0.7902	0.2098	TP	2.0869	No
-	2443	CC(C)=CCCC(C)=CCCC(C)=CC(=O)OCC(=O)C1(O)CCC2C3CCC4=CC(=O)C=CC4(C)C3C(O)CC21C	3.21567	0	0.2349	-0.2349	TN	0.0547	YES
*	2394	Cc1c(CCOc2ccc(C(=O)O)cc2)c2cc(Cl)ccc2n1C(c1ccccc1)c1ccccc1	16.1884	1	0.699	0.301	TP	0.049	YES
#	74	CC(C)NCC(O)COc1ccc(CCOCC2CC2)cc1	8.04783	0	0.4078	-0.4078	TN	0.0218	YES
#	2401	Cc1ccc(F)c(NC(=O)Nc2ccc(-c3cccc4n[nH]c(N)c34)cc2)c1	15.2097	1	0.664	0.336	TP	0.0495	YES
+	2942	CNC(=O)c1cccc(-c2ccc3c(N4CCOCC4C)nc(N4CCOCC4C)nc3n2)c1	-6.43116	0	-0.1102	0.1102	TN	0.0642	YES
*	2403	Cn1c(Nc2ccc(C(F)(F)F)cc2)nc2cc(Oc3ccnc(-c4ncc(C(F)(F)F)[nH]4)c3)ccc21	18.955	1	0.798	0.202	TP	0.0825	YES
#	2426	CCCCCCCCC=CC(=O)O	1.16523	0	0.1616	-0.1616	TN	0.0095	YES
+	2405	O=C(O)c1ccc(-c2c[nH]c3ncc(-c4ccccc4)cc23)cc1C1CCCC1	12.0336	1	0.5504	0.4496	TP	1.0528	No
#	482	CNC(=O)c1c(I)c(C(=O)NCC(=O)Nc2c(I)c(C(=O)O)c(I)c(C(=O)NCCO)c2I)c(I)c(N(C)C(C)=O)c1I	3.36068	0	0.2401	-0.2401	TN	0.1481	YES
#	2415	CC1CCCCN1CCCOC(=O)c1ccc(OC2CCCCC2)cc1	11.7318	1	0.5396	0.4604	TP	0.0255	YES
+	2057	CCC(C(=O)NC(=O)NC(C)=O)c1ccccc1	4.59994	0	0.2844	-0.2844	TN	0.0163	YES
#	2436	CN(C)C(CCOc1cccc2ccccc12)c1ccccc1	17.0231	1	0.7289	0.2711	TP	0.0249	YES
*	940	CCOP(=S)(OCC)Oc1ccc2c(C)c(Cl)c(=O)oc2c1	-1.81821	0	0.0548	-0.0548	TN	2.0422	No
+	2441	Cc1cccc(Nc2nc(NC3CCCCC3N)ncc2C(N)=O)c1	12.3394	1	0.5613	0.4387	TP	0.0327	YES
*	3096	Cc1ccc(C2Nc3ccccc3C(=O)N2c2ccccc2)s1	16.8528	0	0.7228	-0.7228	FP	2.0358	No
*	2475	CCC(CN)=C(c1ccccc1)c1ccccc1	12.7521	1	0.5761	0.4239	TP	0.0212	YES
-	712	Cc1ccc(NC(=O)c2cccc(N(C)C)c2)cc1NC(=O)c1ccc(O)cc1	11.9458	0	0.5472	-0.5472	FP	0.0349	YES
+	2483	Cc1nn(Cc2ccccc2Cl)c(C)c1CN(C)CC(O)COc1ccc(Cl)cc1	9.70989	1	0.4672	0.5328	FN	0.0409	YES
#	3585	CONC(=O)c1ccccc1Nc1cc(Nc2cc(C)nn2C(C)C)ncc1Cl	13.0275	0	0.5859	-0.5859	FP	0.0456	YES
-	2485	COc1cc2nc(-c3ccc(N4CCN(C)CC4)cc3)nc(NCCN3CCOCC3)c2cc1OC	20.28	1	0.8454	0.1546	TP	0.0645	YES
#	2311	CC1(C)CC(O)CC(C)(C)N1[O]	6.78016	0	0.3624	-0.3624	TN	0.0137	YES
#	2495	Cc1cccc(C=NNc2cc(N3CCOCC3)nc(OCCc3ccccn3)n2)c1	26.0256	1	1.0509	-0.0509	TP	0.0456	YES
-	3667	C=CC(=O)Nc1cccc(Oc2nc(Nc3ccc(N4CCN(C)CC4)cc3)nc3ccsc23)c1	2.64569	0	0.2145	-0.2145	TN	0.0659	YES
+	2496	Cc1csc(-c2nnc(Nc3ccc(Oc4ncccc4-c4ccnc(N)n4)cc3)c3ccccc23)c1	22.1281	1	0.9115	0.0885	TP	5.0776	No
#	1722	C=CC1=C(C(=O)O)N2C(=O)C(NC(=O)C(=NO)c3csc(N)n3)C2SC1	-17.0593	0	-0.4904	0.4904	TN	0.0518	YES
-	2508	CCCCCCCc1ccc(CCc2cccc(O)c2C(=O)O)cc1	8.50983	1	0.4243	0.5757	FN	0.0243	YES
*	1226	CCN1CCCC1=O	3.62985	0	0.2497	-0.2497	TN	0.0066	YES
*	2515	CCN(CC)CCCCNc1nc2cc(Cl)c(Cl)cc2nc1-c1ccc(-c2cccs2)s1	23.6358	1	0.9654	0.0346	TP	0.0562	YES
*	2151	CC(=O)C1(O)CCC2C3CCC4=CC(=O)CCC4(C)C3(F)C(O)CC21C	-2.31753	0	0.037	-0.037	TN	0.0409	YES
-	2525	O=C(O)C(=O)c1cn(Cc2ccccc2)c2ccc(-c3ccc(OC(F)(F)F)cc3)cc12	15.2029	1	0.6638	0.3362	TP	0.0528	YES
*	73	NCC(CC(=O)O)c1ccc(Cl)cc1	5.7213	0	0.3246	-0.3246	TN	0.0119	YES
-	2531	Nc1nc(Nc2ccc(S(N)(=O)=O)cc2)nn1C(=O)c1c(F)cccc1F	19.0021	1	0.7997	0.2003	TP	0.0506	YES
+	1913	CC(=O)c1ccc2c(c1)N(CCCN1CCN(CCO)CC1)c1ccccc1S2	19.944	0	0.8334	-0.8334	FP	0.0336	YES
*	2535	S=C(NCc1ccc2c(c1)OCO2)N1CCN(c2ncnc3c2oc2ccccc23)CC1	11.8604	1	0.5442	0.4558	TP	1.0532	No
*	2117	CCCC(=O)OC1(C(=O)COC(=O)CC)C(C)CC2C3CCC4=CC(=O)C=CC4(C)C3(F)C(O)CC21C	-6.10601	0	-0.0986	0.0986	TN	0.0524	YES
*	2545	c1ccc2c(CCNc3ccc(Nc4ccncc4)cc3)c[nH]c2c1	12.7977	1	0.5777	0.4223	TP	0.0398	YES
*	2904	CNC(=O)c1ccc2cc(C3(O)CCn4cncc43)ccc2c1	4.77726	0	0.2908	-0.2908	TN	0.0301	YES
+	2565	COc1ccc(C2CC(c3ccccc3)=NN2c2ccc(S(N)(=O)=O)cc2)cc1	30.4866	1	1.2105	-0.2105	TP	2.0521	No
*	3008	CC(N)c1ccc(C(=O)Nc2ccnc3[nH]ccc23)cc1	6.48215	0	0.3518	-0.3518	TN	0.0227	YES
+	2568	Cc1c(C(=O)Nc2cccc(C(F)(F)F)c2)cc(-c2ccccc2)n1CCCN1CCOCC1	13.2641	1	0.5944	0.4056	TP	0.0532	YES
-	2245	O=C(O)c1ccc(O)c2ncc(N3CCOCC3)cc12	3.75048	0	0.254	-0.254	TN	0.0299	YES
*	2573	CCOC(CN1C(=O)C(CC(=O)Nc2ccc(C)cc2)(NC(=O)Nc2ccc(C)cc2)c2ccccc21)OCC	23.0641	1	0.945	0.055	TP	0.0407	YES
#	1378	CCCCCOC(=O)Nc1nc(=O)n(C2OC(C)C(O)C2O)cc1F	-11.1427	0	-0.2787	0.2787	TN	0.0338	YES
+	2578	CN(C)c1ccc(C2Nc3ccc4ccccc4c3C3=C2C(=O)CC(C)(C)C3)cc1Br	21.8713	1	0.9023	0.0977	TP	2.0581	No
+	3342	COC(=O)CCC(CC(=O)C(CC(=O)OC)NC(=O)OCc1ccccc1)C(=O)NC(C(=O)NC(CC(=O)OC)C(=O)CF)C(C)C	-2.52522	0	0.0295	-0.0295	TN	3.0456	No
+	2600	CN1CC2c3ccccc3Oc3ccc(Cl)cc3C2C1	10.8242	1	0.5071	0.4929	TP	0.0334	YES
#	2133	CCOC(=O)c1ccc(OCCN2CC(O)C(O)C(O)C2CO)cc1	2.41795	0	0.2064	-0.2064	TN	0.0265	YES
+	2621	CCCCCCCCCCCCCCCc1cccc(O)c1C(=O)O	10.7811	1	0.5056	0.4944	TP	0.0204	YES
+	504	CCCc1ncc(C[n+]2ccccc2C)c(N)n1	6.46379	0	0.3511	-0.3511	TN	1.0221	No
*	2651	CN1CCCC(CC2c3ccccc3Sc3ccccc32)C1	15.3411	1	0.6687	0.3313	TP	0.0282	YES
-	2472	CC(=C1CCOC(=O)S1)N(C=O)Cc1cnc(C)nc1N	1.67324	0	0.1797	-0.1797	TN	0.0292	YES
-	2691	Cc1cnc(NC(=O)Nc2cc(Br)c(C)cc2OCC2CNCCO2)cn1	18.2735	1	0.7736	0.2264	TP	1.0366	No
*	2456	c1cc(NC2CCNC2)nc(-c2cnc3ccc(-c4cn[nH]c4)cn23)c1	9.61369	0	0.4638	-0.4638	TN	0.0576	YES
-	2693	c1ccc2c(Oc3nc(Nc4ccc(N5CCOCC5)cc4)c4ncn(C5CCCCC5)c4n3)cccc2c1	20.6538	1	0.8588	0.1412	TP	1.1033	No
*	3194	CCOc1ccc(Cc2cc(C34OCC(CO)(O3)C(O)C(O)C4O)ccc2Cl)cc1	-4.48643	0	-0.0406	0.0406	TN	0.056	YES
#	2701	COc1cccc(C(C)NCCCc2ccccc2Cl)c1	18.7234	1	0.7897	0.2103	TP	0.0241	YES
-	2588	CC1=C2C3OC(=O)C(C)C3CCC2(C)C=CC1=O	1.66035	0	0.1793	-0.1793	TN	0.0291	YES
-	2745	CC(C)C1C(=O)NC(CO)Cc2c[nH]c3cccc(c23)N1C	8.08118	1	0.409	0.591	FN	0.024	YES
#	633	Cc1onc(-c2ccccc2)c1C(=O)NC1C(=O)N2C1SC(C)(C)C2C(=O)O	-7.17684	0	-0.1369	0.1369	TN	0.0515	YES
*	2758	CN1CCC(COc2cnc(-c3cccc(Cn4nc(-c5cccc(C#N)c5)ccc4=O)c3)nc2)CC1	27.3821	1	1.0995	-0.0995	TP	0.1156	YES
*	1732	CC(C)C(N)C(=O)OCCOCn1cnc2c(=O)nc(N)[nH]c21	-9.6677	0	-0.226	0.226	TN	0.0287	YES
-	2764	CC(C)CC(NC(=O)C(Cc1ccccc1)NC(=O)OCc1ccccc1)C(=O)C=O	11.2395	1	0.522	0.478	TP	0.0361	YES
-	2549	Nc1nccc(Oc2ccc(NC(=O)c3c[nH]cc(-c4ccc(F)cc4)c3=O)cc2F)c1Cl	2.19803	0	0.1985	-0.1985	TN	0.0691	YES
*	2765	O=C(NCc1ccccc1)C(Cc1ccccc1)NC(=O)C1OC1C(=O)NCCc1ccc(O)cc1	15.152	1	0.6619	0.3381	TP	0.0435	YES
-	2546	CNCc1ccc(-c2[nH]c3cc(F)cc4c3c2CCNC4=O)cc1	4.16281	0	0.2688	-0.2688	TN	0.0451	YES
-	2770	COc1ccc(-c2oc3c(CC=C(C)C)c(O)cc(O)c3c(=O)c2O)cc1	12.4143	1	0.564	0.436	TP	1.0449	No
#	412	CCCCOc1ccc(OCCCN2CCOCC2)cc1	10.652	0	0.5009	-0.5009	FP	0.0227	YES
*	2775	CC(C)(N)c1ccc(-c2nc3ccccc3nc2-c2ccccc2)cc1	15.8167	1	0.6857	0.3143	TP	2.0456	No
-	507	CC[N+](CC)(CC(=O)Nc1c(C)cccc1C)Cc1ccccc1	6.26338	0	0.3439	-0.3439	TN	0.0229	YES
*	2782	CCc1nc(-c2cccc(C)c2)c(-c2ccnc(NC(=O)c3ccccc3)c2)s1	26.5605	1	1.0701	-0.0701	TP	0.049	YES
+	2948	CCCCOc1ccc(C(=O)Nc2ccc(F)cc2F)cc1	9.57827	0	0.4625	-0.4625	TN	0.0307	YES
-	2783	O=C1NC(=O)C(=Cc2cccc(C(F)(F)F)c2)S1	17.6758	1	0.7522	0.2478	TP	0.0342	YES
+	3897	CCC(=O)NCC1CC1c1cccc2c1CCO2	4.79663	0	0.2915	-0.2915	TN	0.0172	YES
*	2789	COc1ccc2c(Oc3ccc(NC(=O)c4c(C)n(CC(C)(C)O)n(-c5ccccc5)c4=O)cc3F)ccnc2c1	29.9195	1	1.1902	-0.1902	TP	0.1232	YES
*	3577	CC1=CCC(=C(C)C)C(=O)CC(C)=CCC1	0.37463	0	0.1333	-0.1333	TN	0.0172	YES
-	2790	CN(C)CC(=O)N1CCC(c2ccc(NC(=O)c3ncc(C#N)[nH]3)c(C3=CCCCC3)c2)CC1	18.4586	1	0.7802	0.2198	TP	0.0564	YES
+	1902	CN(C)CCC(O)(c1ccccc1)c1ccccc1Cl	12.436	0	0.5648	-0.5648	FP	0.0266	YES
-	2803	NC(=O)c1cccc2cn(-c3ccc(C4CCCNC4)cc3)nc12	17.6506	1	0.7513	0.2487	TP	0.0472	YES
#	3709	COc1cc(C)[nH]c(=O)c1CNC(=O)c1c(C)n(C(C)C2CCN(CC(F)(F)F)CC2)c2ccccc12	10.2238	0	0.4856	-0.4856	TN	0.0529	YES
#	2822	CC(NC(=O)C(=O)Nc1ccccc1C(C)(C)C)C(=O)NC(CC(=O)O)C(=O)COc1c(F)c(F)cc(F)c1F	10.7045	1	0.5028	0.4972	TP	0.0548	YES
*	1392	CCOC(=O)OC1(C(=O)OCCl)CCC2C3CCC4=CC(=O)C=CC4(C)C3C(O)CC21C	2.02527	0	0.1923	-0.1923	TN	0.0489	YES
#	2825	Cc1c(NC(=O)OCC2COCCN2)cn2ncnc(Nc3ccc4c(cnn4Cc4cccc(F)c4)c3)c12	19.8538	1	0.8301	0.1699	TP	0.0893	YES
-	2062	CC(C)(C)c1nnc(NS(=O)(=O)c2ccccc2)s1	10.7318	0	0.5038	-0.5038	FP	3.0303	No
-	2842	Cc1ccc(NC(=O)c2ccc(CN3CCC(N(C)C)C3)c(C(F)(F)F)c2)cc1Nc1ncc(-c2cncnc2)cn1	18.3399	1	0.776	0.224	TP	0.0676	YES
#	2918	CC(=O)OC12COC1CC(O)C1(C)C(=O)C(O)C3=C(C)C(O)CC(O)(C(OC(=O)c4ccccc4)C21)C3(C)C	4.34295	0	0.2752	-0.2752	TN	0.0645	YES
-	2849	CCC1C=CC=CCC(C)C(O)C(C)(O)C(=O)C(C)C(O)C(C)C(=O)C(C)C(O)C(C)C=CC(=O)OC2C(C)C(CC1)OC1(CCC(C)C(CC(C)O)O1)C2C	24.8897	1	1.0103	-0.0103	TP	0.0597	YES
#	831	CCCC(CCC)C(=O)O	-1.13417	0	0.0793	-0.0793	TN	0.0062	YES
#	2853	CC(C)(C)Cn1c(N)nc2ccc(-c3nc(C(C)(C)C)[nH]c3-c3ccc(F)cc3)nc21	22.1332	1	0.9117	0.0883	TP	0.0621	YES
*	324	NNC(=O)c1ccncc1	9.15442	0	0.4474	-0.4474	TN	1.0119	No
-	2856	COc1cc(Nc2nc3ccccc3nc2NS(=O)(=O)c2ccc(NC(=O)c3ccc(C)c(OC)c3)cc2)cc(OC)c1	12.8284	1	0.5788	0.4212	TP	2.0648	No
#	255	CCCn1cnc2c1c(=O)n(CCCCC(C)=O)c(=O)n2C	-3.44299	0	-0.0033	0.0033	TN	0.0333	YES
-	2857	CNC(=O)c1ccc2c(c1)NC(=O)/C2=C(/Nc1cccc(CN(C)C)c1)c1ccccc1	21.6065	1	0.8928	0.1072	TP	1.0505	No
*	1640	CCN(CC)CCOC(=O)c1cccnc1	5.48566	0	0.3161	-0.3161	TN	0.0138	YES
+	2861	CCCCCCCCCCCCc1ccc(S(=O)(=O)Nc2nncs2)cc1	14.1184	1	0.625	0.375	TP	1.0412	No
-	1175	O=C1C=CCC2C3CCCN4CCCC(CN12)C34	7.75679	0	0.3974	-0.3974	TN	0.0335	YES
-	2884	C=C1C(=O)C23C(O)C1CCC2C12COC3(O)C(O)C1C(C)(C)CCC2O	13.794	1	0.6134	0.3866	TP	0.0382	YES
#	1494	CCCCCCCCCCC(CO)CCCCCCCC	9.49269	0	0.4595	-0.4595	TN	0.0146	YES
*	2888	CNC(C)C1C(O)CC2(C)C3CCC4C(C)(C)C(NC)CCC45CC35CCC12C	18.3615	1	0.7767	0.2233	TP	0.0503	YES
*	2880	COc1c(O)cc2c(c1O)C1OC(CO)C(O)C(O)C1OC2=O	4.27491	0	0.2728	-0.2728	TN	0.0298	YES
#	2899	O=C1NC(=O)/C(=C/c2ccc(-c3ccc(F)cc3)o2)S1	19.4331	1	0.8151	0.1849	TP	0.0586	YES
+	377	COc1ccc(C(=O)c2ccccc2O)c(O)c1	8.51673	0	0.4246	-0.4246	TN	1.0203	No
+	2903	Cn1cc(-c2ccncc2)c(-c2ccc(OCc3ccc4ccccc4n3)cc2)n1	12.7031	1	0.5743	0.4257	TP	1.0596	No
-	2536	O=C(Nc1ccc(OC(F)(F)F)cc1)c1sccc1NCc1ccnc2ccccc12	8.94103	0	0.4397	-0.4397	TN	0.0498	YES
#	2943	COc1cc(NC(=O)c2ccc(-c3ccc(Cl)cc3)o2)cc(OC)c1	17.6425	1	0.751	0.249	TP	0.0403	YES
*	2752	COCC1OC(=O)c2coc3c2C1(C)C1=C(C3=O)C2CCC(O)C2(C)CC1OC(C)=O	-7.7144	0	-0.1561	0.1561	TN	2.0465	No
#	2953	COc1cc(CCc2cc(NC(=O)c3ccc(N4CC(C)NC(C)C4)cc3)[nH]n2)cc(OC)c1	14.3971	1	0.6349	0.3651	TP	0.056	YES
+	3789	COc1ccc2c(c1)C(c1ccc(F)cc1)=C(CN1CCCC1)CO2	10.4651	0	0.4943	-0.4943	TN	1.0367	No
#	2965	CC(O)(C#Cc1ccc2c(c1)N(c1nc(N)ncc1Cl)CC2)c1nccs1	18.7652	1	0.7912	0.2088	TP	0.0554	YES
#	2645	NC(CCC(=O)NC(CS)C(=O)NCC(=O)O)C(=O)O	-2.94642	0	0.0145	-0.0145	TN	0.0224	YES
-	2968	NC(=O)c1cccc(-c2cc(Nc3ccc(OC(F)(F)F)cc3)ncn2)c1	12.9784	1	0.5842	0.4158	TP	0.0516	YES
-	3456	Cc1ccccc1-c1cc(N2CCN(C)CC2)ncc1N(C)C(=O)C(C)(C)c1cc(C(F)(F)F)cc(C(F)(F)F)c1	12.7218	0	0.575	-0.575	FP	0.0798	YES
-	2995	NC(=O)c1noc(C(CCCC2CCCCC2)CC(=O)NO)n1	6.70281	1	0.3597	0.6403	FN	1.0345	No
-	1639	O=C(O[Ca]OC(=O)C(CC(=O)N1CC2CCCCC2C1)Cc1ccccc1)C(CC(=O)N1CC2CCCCC2C1)Cc1ccccc1	8.70216	0	0.4312	-0.4312	TN	0.0469	YES
#	3001	CC1(N2CCC(n3c(C4CCCNC4)nc4ccccc43)CC2)CCCCCCC1	15.8843	1	0.6881	0.3119	TP	0.0595	YES
*	832	O=C(O)COc1ccccc1	0.52791	0	0.1388	-0.1388	TN	0.0107	YES
*	3003	Cc1ccc(NC(=O)Nc2cc(C(F)(F)F)ccc2F)cc1Nc1ccc2c(c1)NC(=O)C2=Cc1ccc[nH]1	17.0913	1	0.7313	0.2687	TP	0.0615	YES
-	2975	COc1ccc(CC(C)C(C)Cc2ccc(OC)c(OC)c2)cc1OC	8.71058	0	0.4315	-0.4315	TN	0.0311	YES
*	3020	c1ccc(CNc2nc(N3CCOc4ccccc43)nc3c2CCCC3)cc1	17.4407	1	0.7438	0.2562	TP	0.0466	YES
-	3393	CCOc1ccc(CC2NC(=O)CCSSCC(C(=O)N3CCCC3C(=O)NC(CCCN)C(=O)NCC(N)=O)NC(=O)C(CC(N)=O)NC(=O)C(C(C)O)NC(=O)C(C(C)CC)NC2=O)cc1	1.96483	0	0.1902	-0.1902	TN	1.0683	No
+	3026	N#Cc1c(C2CCNCC2)cc(-c2c(O)cccc2OCC2CC2)nc1N	10.9757	1	0.5125	0.4875	TP	1.047	No
-	1066	CCC(CCC(C)C1CCC2C3CC=C4CC(O)CCC4(C)C3CCC12C)C(C)C	6.35472	0	0.3472	-0.3472	TN	0.0388	YES
*	3033	O=C1CSC(=O)N1C(CCc1ccncc1)COc1ccc(-c2cccc([N+](=O)[O-])c2)cc1	16.029	1	0.6933	0.3067	TP	0.0434	YES
-	2258	COc1ccc(COc2ccc(Cc3cnc(N)nc3N)cc2OC)cc1	8.93348	0	0.4395	-0.4395	TN	1.0362	No
-	3073	COc1ccc(C(O)C(C)Oc2ccc(C3OC(c4ccc(OC(C)C(O)c5ccc(OC)c(OC)c5)c(OC)c4)C(C)C3C)cc2OC)cc1OC	14.8476	1	0.651	0.349	TP	1.1316	No
-	635	CC12CCC(=O)C=C1CCC1C2C(O)CC2(C)C1CCC2(O)C(=O)CO	0.15353	0	0.1254	-0.1254	TN	0.0287	YES
-	3081	Cc1cc(Nc2ncc(Cl)c(Nc3ccccc3S(=O)(=O)C(C)C)n2)c(OC(C)C)cc1C1CCNCC1	16.8413	1	0.7224	0.2776	TP	1.0543	No
*	333	Cc1cc(C(=O)NNCc2ccccc2)no1	3.47941	0	0.2444	-0.2444	TN	1.0238	No
+	3083	NC(=O)c1cnc(NC2CCCCC2N)nc1Nc1cccc(-n2nccn2)c1	15.2054	1	0.6638	0.3362	TP	3.0502	No
+	2841	CN(C)CCN1C(=O)c2cccc3cc(N)cc(c23)C1=O	8.87688	0	0.4374	-0.4374	TN	0.028	YES
-	3084	CCOc1ccccc1-n1c(C(C)N2CCN(C(=O)COc3ccc(Cl)cc3)CC2)nc2ccccc2c1=O	13.6657	1	0.6088	0.3912	TP	3.0531	No
+	150	N=C(N)NC(=O)Cc1c(Cl)cccc1Cl	5.83554	0	0.3286	-0.3286	TN	0.0201	YES
#	3089	Cc1cn(CCN2CCN(c3ccccc3-c3cc(C#N)cc(C(=O)NCCCN4CCCC4)c3)CC2)c2ccccc12	16.0263	1	0.6932	0.3068	TP	0.0849	YES
*	3837	CCCC(=O)OC1CN2CCC(O)C2C(O)C1O	-5.29398	0	-0.0695	0.0695	TN	0.0184	YES
#	3110	Cn1c(NCC(N)Cc2ccccc2)nc(-c2ccncc2)c(-c2ccc3ccccc3c2)c1=O	27.6882	1	1.1104	-0.1104	TP	0.0534	YES
#	1422	CC(=O)OC1Cc2ccccc2N(C(N)=O)c2ccccc21	0.94134	0	0.1536	-0.1536	TN	0.025	YES
+	3121	COc1ccc(CNC(=O)Nc2ncc([N+](=O)[O-])s2)cc1	17.1371	1	0.7329	0.2671	TP	1.0307	No
+	2149	COc1ccc2c(C(=S)N(C)CC(=O)O)cccc2c1C(F)(F)F	2.59257	0	0.2126	-0.2126	TN	0.0362	YES
#	3122	N#Cc1ccc2[nH]cc(CCCCN3CCN(c4ccc5oc(C(N)=O)cc5c4)CC3)c2c1	23.0042	1	0.9428	0.0572	TP	0.0976	YES
+	3386	COc1cc(N2CCC(O)CC2)ccc1Nc1cc(Nc2ccccc2S(=O)(=O)C(C)C)c2cc[nH]c2n1	3.7241	0	0.2531	-0.2531	TN	1.0543	No
#	3125	CCCN1CCN(c2ccc(C(=O)NC3(C(=O)NCC#N)CCCCC3)cc2)CC1	16.4152	1	0.7071	0.2929	TP	0.043	YES
#	3099	O=C(Nc1cccnc1)c1cc(-c2ccnc(F)c2)ccc1OCc1ccccc1	16.423	0	0.7074	-0.7074	FP	0.0476	YES
*	3145	O=c1ccc2ccc(OCCCCN3CCN(c4cccc5sccc45)CC3)cc2[nH]1	23.183	1	0.9492	0.0508	TP	0.0717	YES
-	1574	COc1cc2c(cc1OC)C(Cc1cc(OC)c(OC)c(OC)c1)[N+](C)(CCCOC(=O)CCC=CCCC(=O)OCCC[N+]1(C)CCc3cc(OC)c(OC)cc3C1Cc1cc(OC)c(OC)c(OC)c1)CC2	2.19466	0	0.1984	-0.1984	TN	1.1004	No
*	3147	CNC(C)C(=O)NC(C(=O)N1CCCC1c1nc(C(=O)c2ccc(F)cc2)cs1)C1CCCCC1	26.0197	1	1.0507	-0.0507	TP	1.0423	No
#	1580	CC(C)(CO)C(O)C(=O)NCCCC(=O)O	-2.02338	0	0.0475	-0.0475	TN	0.016	YES
#	3148	COc1cc(NC(=O)Nc2cccc(CNC(=O)OC3CCOC3)c2)ccc1-c1cnco1	10.1909	1	0.4845	0.5155	FN	0.0454	YES
+	3777	CC12CCCN1CC1=NNC(=O)c3cc(F)cc4[nH]c2c1c34	-0.94557	0	0.086	-0.086	TN	1.0392	No
*	3155	Cc1ncc(NC(=O)c2ccc(CN3CCN(C)CC3)c(C(F)(F)F)c2)cc1Nc1nccc(-c2cccnc2)n1	20.3177	1	0.8467	0.1533	TP	0.0677	YES
*	638	COC1(NC(=O)CSCC#N)C(=O)N2C(C(=O)O)=C(CSc3nnnn3C)CSC21	2.93867	0	0.225	-0.225	TN	0.0748	YES
+	3170	CCCC(NC1CCc2cc(F)cc(F)c2C1)C(=O)Nc1cn(C(C)(C)CNCC(C)(C)C)cn1	27.6497	1	1.109	-0.109	TP	0.0544	YES
*	1224	C(=Cc1ccncc1)c1ccccc1	8.70399	0	0.4313	-0.4313	TN	0.0184	YES
#	3205	COc1cccc(N2CCN(C3=Nc4c(F)cccc4C(CC(=O)O)N3c3cc(C(F)(F)F)ccc3OC)CC2)c1	26.2743	1	1.0598	-0.0598	TP	0.0806	YES
#	3853	CC(=O)OC1CC(OC2C(O)CC(OC3C(O)CC(OC4CCC5(C)C(CCC6C5CCC5(C)C(C7=CC(=O)OC7)CCC65O)C4)OC3C)OC2C)OC(C)C1O	6.36157	0	0.3475	-0.3475	TN	0.0869	YES
#	3208	O=C1NC(=O)C(c2cnc3ccccn23)=C1c1cn2c3c(cc(F)cc13)CN(C(=O)N1CCCCC1)CC2	26.6514	1	1.0733	-0.0733	TP	0.0672	YES
#	2174	COc1cc(C2c3cc4c(cc3C(OC3OC5COC(C)OC5C(O)C3O)C3COC(=O)C23)OCO4)cc(OC)c1OP(=O)(O)O	-8.62084	0	-0.1885	0.1885	TN	0.0978	YES
#	3212	Cn1cc(-c2cc(Oc3cc(F)c(NC(=O)C4(C(=O)Nc5ccccc5)CC4)cc3F)ccn2)cn1	18.9012	1	0.7961	0.2039	TP	0.1188	YES
+	1953	CC(C=CC1=C(C)CCCC1(C)C)=CC=CC(C)=CC(=O)Oc1c(C)c(C)c2c(c1C)CCC(C)(CCCC(C)CCCC(C)CCCC(C)C)O2	19.7784	0	0.8274	-0.8274	FP	0.0611	YES
#	3224	C=CC1(C)CC(OC(=O)CSC2CC3CCC(C2)N3C)C2(C)C(C)CCC3(CCC(=O)C32)C(C)C1O	16.4808	1	0.7095	0.2905	TP	0.05	YES
*	2714	CC(=O)NC(CCC(N)=O)C(=O)O	-8.20634	0	-0.1737	0.1737	TN	0.0097	YES
+	3239	CS(=O)(=O)N1CCC(NC(=O)c2[nH]ncc2NC(=O)c2c(Cl)cccc2Cl)CC1	7.95034	1	0.4043	0.5957	FN	0.0421	YES
*	685	CC(Oc1ccc(O)cc1)(P(=O)(O)O)P(=O)(O)O	7.08126	0	0.3732	-0.3732	TN	0.0347	YES
#	3246	CCCCCOc1ccc(-c2ccc(-c3ccc(C(=O)NC4CC(O)C(O)NC(=O)C5C(O)C(C)CN5C(=O)C(C(C)O)NC(=O)C(C(O)C(O)c5ccc(O)cc5)NC(=O)C5CC(O)CN5C(=O)C(C(C)O)NC4=O)cc3)cc2)cc1	28.3879	1	1.1354	-0.1354	TP	0.1634	YES
#	3635	CCc1ccc(Cc2ccc3c(c2)C2(OC3)OC(CO)C(O)C(O)C2O)cc1	0.64745	0	0.143	-0.143	TN	0.0413	YES
#	3251	CCCC1(CCC)CCC2(CCN(CCCN(CC)CC)C2)CC1	13.2313	1	0.5932	0.4068	TP	0.0221	YES
*	2516	CCCCn1c(=O)n(Cc2ccccc2F)c(=O)c2[nH]c(Cc3ccc(NC(C)=O)cc3)nc21	2.22989	0	0.1996	-0.1996	TN	0.0574	YES
#	3252	CC1(C)CN2C(CSC(=NC3CCCCC3)NC3CCCCC3)=CSC2=N1	16.9408	1	0.7259	0.2741	TP	0.0532	YES
*	759	COP(=S)(OC)SCN1C(=O)c2ccccc2C1=O	5.8156	0	0.3279	-0.3279	TN	0.034	YES
+	3266	CON(C)C(=O)N1N=C(c2cc(F)ccc2F)SC1(CCCN)c1ccccc1	20.329	1	0.8471	0.1529	TP	3.0486	No
+	1258	COC1=CC2C3Cc4ccc(OC)c(O)c4C2(CCN3C)CC1=O	-2.85991	0	0.0176	-0.0176	TN	1.0414	No
-	3278	Cc1nc(C)c(CN2CCN(C(c3ccc(F)cc3)c3ccc(F)cc3)CC2)nc1C	19.0724	1	0.8022	0.1978	TP	0.0597	YES
+	2303	N#Cc1cc(NC(=O)Nc2nnc(-c3ccncc3)s2)ccc1-c1cn[nH]c1	4.93213	0	0.2963	-0.2963	TN	1.0584	No
+	3286	Nc1ncnc2c1c(-c1cccc(OCc3ccccc3)c1)cn2C1CC(CN2CCCC2)C1	24.3968	1	0.9927	0.0073	TP	0.0628	YES
#	1878	CC(C)CCC(=O)OC1CCC2C3CCC4=CC(=O)CCC4(C)C3CCC12C	5.68896	0	0.3234	-0.3234	TN	0.0371	YES
#	3297	Cc1cncc(CN2CCC(=C3c4ccc(Cl)cc4CCc4cccnc43)CC2)c1	16.6938	1	0.7171	0.2829	TP	0.0589	YES
+	2293	CCCc1nc(C(C)(C)O)c(C(=O)O)n1Cc1ccc(-c2ccccc2-c2nn[nH]n2)cc1	2.77788	0	0.2193	-0.2193	TN	2.0599	No
#	3302	Cn1nc(C(C)(C)C)cc1C(=O)NC(Cc1cccc(Cl)c1)C(=O)NCC#N	20.7463	1	0.8621	0.1379	TP	0.0451	YES
*	3664	O=C(O)CNC(=O)c1c(O)n(C2CCCCC2)c(=O)n(C2CCCCC2)c1=O	-0.08285	0	0.1169	-0.1169	TN	0.0405	YES
+	3312	CCC(C)Nc1cc(C(=O)NC2CC3CCC(C2)N3c2ccc(C(=O)C3CC3)cn2)c(C)cc1C(N)=O	18.7289	1	0.7899	0.2101	TP	0.0463	YES
-	3027	COCCOc1nc(-c2ccc(Cl)c(Cl)c2)n(-c2ccc(NC(=O)CCl)cc2)n1	6.7425	0	0.3611	-0.3611	TN	0.047	YES
-	3322	CNCc1ccc(-c2cc(-c3nc(-c4ccc(S(=O)(=O)C(C)C)cc4)cnc3N)on2)cc1	14.2457	1	0.6295	0.3705	TP	0.0831	YES
#	1420	NC(=O)c1ncn(C2OC(CO)C(O)C2O)c1N	-11.6304	0	-0.2962	0.2962	TN	0.0279	YES
+	3327	CC(NC(=O)C(Cc1ccccc1)NC(=O)OCc1ccccc1)C(=O)CF	16.1153	1	0.6964	0.3036	TP	2.0327	No
+	3682	OCc1cc(C(O)CNCCCCCCOCCOCc2c(Cl)cccc2Cl)ccc1O	14.9394	0	0.6543	-0.6543	FP	0.0382	YES
*	3331	OCCOc1ccc(C(=C(CCCl)c2ccccc2)c2ccccc2)cc1	23.1059	1	0.9465	0.0535	TP	1.028	No
#	2212	O=C(O)C(=O)Nc1cccc(-c2nn[nH]n2)c1	-7.77818	0	-0.1584	0.1584	TN	0.0259	YES
#	3338	CC(C)(C)c1ccc(CN2CCN(C(c3ccccc3)c3ccc(Cl)cc3)CC2)cc1	27.6589	1	1.1094	-0.1094	TP	0.0493	YES
*	2312	CCCCCCC=CCCCCCCCC(=O)O	3.99056	0	0.2626	-0.2626	TN	0.0132	YES
*	3348	Cc1nc2ccc(-n3ncc(C(=O)c4cc5ccccc5[nH]4)c3N)cc2[nH]1	24.6541	1	1.0019	-0.0019	TP	3.0838	No
+	1309	O=c1c(-c2ccc(O)cc2)coc2cc(OC3OC(CO)C(O)C(O)C3O)ccc12	10.3904	0	0.4916	-0.4916	TN	2.0567	No
*	3356	Nc1nc(Nc2ccc3c(c2)CCC(N2CCCC2)CC3)nn1-c1cc2c(nn1)-c1ccccc1CCC2	23.7455	1	0.9694	0.0306	TP	1.0663	No
-	2068	CCCCCC=CCC=CCCCCCCCC(=O)NC(C)c1ccccc1	15.3965	0	0.6707	-0.6707	FP	0.0255	YES
*	3359	CCCCCCCCCC(=O)OCCN1CCN(CCCN2c3ccccc3Sc3ccc(C(F)(F)F)cc32)CC1	21.695	1	0.896	0.104	TP	0.0568	YES
*	1774	CCNCC(O)c1cccc(O)c1	7.13304	0	0.3751	-0.3751	TN	0.0123	YES
*	3361	CC(C)(CNC(=O)c1cccc(-c2noc(C(F)(F)F)n2)c1)c1coc(-c2ccccc2)n1	20.5493	1	0.855	0.145	TP	3.0759	No
#	280	CCN1CCCC1CNC(=O)c1cc(S(N)(=O)=O)ccc1OC	6.55327	0	0.3543	-0.3543	TN	0.0338	YES
+	3368	CC(C=CC1CC1(C)c1ccc2c(c1)C(C)(C)CCC2(C)C)=CC(=O)O	12.4454	1	0.5651	0.4349	TP	0.0333	YES
#	273	CC(=O)SC1CC2=CC(=O)CCC2(C)C2CCC3(C)C(CCC34CCC(=O)O4)C12	-6.10502	0	-0.0985	0.0985	TN	0.0514	YES
+	3370	CC#CC(CC(=O)O)c1ccc(OCc2cccc(-c3ccc(C(F)(F)F)cc3)c2)cc1	20.8017	1	0.864	0.136	TP	0.0579	YES
-	1938	COCC(=O)Nc1cc(Sc2ccccc2)ccc1N=C(NC(=O)OC)NC(=O)OC	5.2916	0	0.3092	-0.3092	TN	0.0378	YES
-	3381	Fc1ccc(-c2[nH]c(-c3ccccc3F)nc2-c2ccncc2)cc1	12.4056	1	0.5637	0.4363	TP	3.04	No
#	3618	CC1(C)CC1C(=O)NC(=CCCCCSCC(N)C(=O)O)C(=O)O	-9.60041	0	-0.2236	0.2236	TN	0.024	YES
#	3382	O=C(CCCN1CCC(n2c(=S)[nH]c3ccccc32)CC1)c1ccc(F)cc1	13.8332	1	0.6147	0.3853	TP	0.048	YES
*	3693	CC(C)CC1NC(=O)C(C(C)C)NC(=O)C2CCCN2C(=O)C(CC(=O)O)NC(=O)C(Cc2c[nH]c3ccccc23)NC1=O	4.16643	0	0.2689	-0.2689	TN	0.0472	YES
-	3384	Clc1cc2c(NC3CCCC3)nnc(-c3ccncc3)c2cc1Cl	15.7081	1	0.6818	0.3182	TP	0.0397	YES
*	3426	N=C1CCCN1Cc1[nH]c(=O)[nH]c(=O)c1Cl	-0.34689	0	0.1075	-0.1075	TN	0.0197	YES
#	3390	O=C(O)c1ccc(CCCc2ccc(OCCc3ccc(F)cc3)cc2)o1	20.3117	1	0.8465	0.1535	TP	0.0444	YES
#	621	CCCC(=O)OC1(C(=O)CCl)C(C)CC2C3CCC4=CC(=O)C=CC4(C)C3(F)C(=O)CC21C	-6.17561	0	-0.1011	0.1011	TN	0.0538	YES
+	3398	CN1CCC(c2c(O)cc(O)c3c(=O)cc(-c4ccc(C(F)(F)F)cc4Cl)oc23)C1CO	19.8831	1	0.8312	0.1688	TP	3.0687	No
+	738	COC(=O)C1=C(C)NC(C)=C(C(=O)OC(C)C)C1c1cccc2nonc12	4.71166	0	0.2884	-0.2884	TN	0.0511	YES
+	3411	O=C(Nc1ncc([N+](=O)[O-])s1)c1ccccc1O	17.755	1	0.7551	0.2449	TP	1.0238	No
+	227	CCCCCCCCCCCCCCCC(=O)NCCO	6.54023	0	0.3538	-0.3538	TN	0.0138	YES
*	3415	COc1cc(N2CCN(C)CC2)ccc1Nc1nccc(-c2cn(C)c3cnccc23)n1	11.8605	1	0.5442	0.4558	TP	0.0524	YES
-	2616	CCOC(=O)C(CCc1ccccc1)NC1CSC(c2cccs2)CN(CC(=O)O)C1=O	7.27423	0	0.3801	-0.3801	TN	0.0469	YES
#	3463	CCCCNc1ncc2c(-c3ccc(CN4CCN(C)CC4)cc3)cn(C3CCC(O)CC3)c2n1	16.4903	1	0.7098	0.2902	TP	0.0632	YES
+	2816	CCNC(=O)Nc1ccc(-c2nc3c(c(N4CCOCC4C)n2)CCN(C2COC2)C3)cc1	0.92323	0	0.1529	-0.1529	TN	0.0602	YES
*	3464	COc1ccc(C(C)(C)C)cc1CNC1C2CCN(CC2)C1C(c1ccccc1)c1ccccc1	26.3562	1	1.0628	-0.0628	TP	0.0441	YES
#	1822	CN(CCCCCCCCCCN(C)C(=O)Oc1cccc([N+](C)(C)C)c1)C(=O)Oc1cccc([N+](C)(C)C)c1	11.1847	0	0.52	-0.52	FP	0.0446	YES
+	3469	O=C1Nc2nc(-c3c(O)cccc3OCC3CC3)cc(C3CCCNC3)c2CO1	23.4091	1	0.9573	0.0427	TP	0.0479	YES
+	28	CC(C)(C)NCC(O)c1ccc(O)c(CO)n1	6.08841	0	0.3377	-0.3377	TN	0.0254	YES
+	3475	CC(C)C(O)(c1ccc2cc(OC(F)F)c(OC(F)F)cc2c1)c1cn[nH]n1	6.24754	1	0.3434	0.6566	FN	0.0499	YES
#	1321	O=[N+]([O-])NC1=NCCN1Cc1ccc(Cl)nc1	0.58584	0	0.1408	-0.1408	TN	0.0202	YES
+	3483	O=C1NNc2nc(CN3Cc4ccccc4C3)nc3cccc1c23	23.1506	1	0.9481	0.0519	TP	1.0491	No
-	3540	COc1c(O)cc2oc(-c3ccccc3)cc(=O)c2c1O	12.1118	0	0.5532	-0.5532	FP	0.0341	YES
*	3508	CCCCCCCCCCCCCCCCOc1nc2ccc(C)cc2c(=O)o1	11.8675	1	0.5444	0.4556	TP	0.033	YES
*	1069	NC(Cc1cnc[nH]1)C(=O)O	-3.06976	0	0.0101	-0.0101	TN	0.0108	YES
-	3511	COCCNC(=O)Nc1ccc2nc(-c3cccs3)c(-c3cccs3)nc2c1	18.7392	1	0.7903	0.2097	TP	2.0522	No
#	2346	CCOCCOC(=O)C=Cc1ccc(OC)cc1	1.5521	0	0.1754	-0.1754	TN	0.0187	YES
#	3514	CC1CN(CC(=O)N2CC(C)(C)c3ncc(Cc4ccc(F)cc4)cc32)C(CN2CCOCC2C)CN1	20.2266	1	0.8435	0.1565	TP	0.0699	YES
#	3506	CNC1CCc2[nH]c3ccc(C(N)=O)cc3c2C1	1.26291	0	0.1651	-0.1651	TN	0.0212	YES
+	3525	CC1=C2CC3C(CCC4CC(NS(C)(=O)=O)CCC43C)C2CCC2(C1)OC1CC(C)CNC1C2C	21.2474	1	0.88	0.12	TP	3.0579	No
#	818	C=Cc1ccccc1	6.29267	0	0.345	-0.345	TN	0.0095	YES
#	3530	CCCCCCC(C)(C)c1cc(O)c2c(c1)OC(C)(C)C1CC=C(CO)CC21	24.0219	1	0.9792	0.0208	TP	0.0407	YES
-	3334	CNc1nc(Nc2cnn(C3CCN(C4COC4)CC3F)c2Cl)ncc1C(F)(F)F	3.96803	0	0.2618	-0.2618	TN	0.057	YES
+	3532	COc1ccccc1C(=O)Nc1cc2c(cc1N1CCCC1)n(C)c(=O)n2C	3.63123	1	0.2498	0.7502	FN	1.0386	No
*	575	CCOc1ccc2nc(S(N)(=O)=O)sc2c1	9.54209	0	0.4612	-0.4612	TN	0.0296	YES
-	3544	C=CC(=O)Nc1cccc(C)c1Nc1ncc2cc(-c3c(Cl)c(OC)cc(OC)c3Cl)ccc2n1	18.8819	1	0.7954	0.2046	TP	3.052	No
+	1399	CC(C)(C)c1ccc(C(=O)CCCN2CCC(OC(c3ccccc3)c3ccccc3)CC2)cc1	18.8225	0	0.7932	-0.7932	FP	0.0501	YES
-	3567	Cc1cc(C)c(CNC(=O)c2cc(-c3ccc(N4CCN(C)CC4)nc3)cc3c2c(C)cn3C(C)C)c(=O)[nH]1	17.0378	1	0.7294	0.2706	TP	0.0688	YES
*	3127	O=C(O)c1cc(C(F)(F)F)ccc1N1CCC(OCc2ccccn2)C1	13.0439	0	0.5865	-0.5865	FP	0.0461	YES
-	3586	COc1nc(OCc2cccc(-c3ccccc3)c2C)ccc1CNCCNC(C)=O	21.0926	1	0.8745	0.1255	TP	0.0411	YES
*	1543	C=CC[N+]1(C2CC3C4CCC5CC(O)C(N6CCOCC6)CC5(C)C4CCC3(C)C2OC(C)=O)CCCC1	-2.64388	0	0.0253	-0.0253	TN	0.0584	YES
#	3591	Nc1nc(OC(c2ccc(-c3cccc(F)c3)cc2)C(F)(F)F)cc(-c2ccc(CC(N)C(=O)O)cc2)n1	19.8402	1	0.8296	0.1704	TP	0.07	YES
*	2950	CC(C)(O)CCC(O)C(C)(O)C1CCC2(O)C3=CC(=O)C4CC(O)C(O)CC4(C)C3CCC12C	-4.51213	0	-0.0415	0.0415	TN	0.0515	YES
-	3593	CCOC(=O)NC1CCC2C(C1)CC1C(=O)OC(C)C1C2C=Cc1ccc(-c2cccc(F)c2)cn1	19.0678	1	0.802	0.198	TP	0.0513	YES
+	2257	Cc1cc(SCc2sc(-c3ccc(C(F)(F)F)cc3)nc2C)ccc1OCC(=O)O	1.55428	0	0.1755	-0.1755	TN	1.0592	No
+	3607	COCCNCc1ccc(-c2cc3nccc(Oc4ccc(NC(=S)NC(=O)Cc5ccc(F)cc5)cc4F)c3s2)nc1	29.535	1	1.1765	-0.1765	TP	3.1301	No
#	3284	CC(=O)OC(C)(C)CCC(=O)C(C)(O)C1C(O)CC2(C)C3CC=C4C(CC(O)C(O)C4(C)C)C3(C)C(=O)CC12C	-5.37043	0	-0.0722	0.0722	TN	0.0588	YES
+	3619	CC12CCC3c4ccc(OC(=O)N(CCCl)CCCl)cc4CCC3C1CCC2OP(=O)(O)O	23.5603	1	0.9627	0.0373	TP	4.056	No
+	1553	Cc1cc(=O)c(C(=O)NC(C(=O)NC2C(=O)N3C(C(=O)O)=C(CSc4nnnn4C)CSC23)c2ccc(O)cc2)c[nH]1	0.31671	0	0.1312	-0.1312	TN	0.0815	YES
-	3638	CCC(NC(=O)C(CS(=O)(=O)CC1CC1)NC(c1ccc(F)cc1)C(F)(F)F)C(=O)C(=O)NC1CC1	12.4429	1	0.565	0.435	TP	0.0577	YES
-	2679	CC#CC1(O)CCC2C3CC(C)C4=CC(=O)CCC4(C)C3CCC21C	11.4509	0	0.5295	-0.5295	FP	0.0445	YES
#	3644	COc1ccc2c(c1)C1(CC1c1ccc3c(C=Cc4ccc(CN5CC(C)OC(C)C5)cc4)[nH]nc3c1)C(=O)N2	13.1647	1	0.5908	0.4092	TP	0.0804	YES
*	3927	CN1CC(O)c2cc(N=NC(=N)N)c(O)cc21	-3.33765	0	0.0005	-0.0005	TN	0.0282	YES
+	3653	Cn1ncc2cc(-c3cnc(N)c(Cl)c3N3CCC4(CCNC4=O)CC3)ccc21	19.9935	1	0.8351	0.1649	TP	1.0555	No
+	3526	CCc1cc2c(c(OCC(F)(F)F)c(C(=O)NC3CCN(C(=O)CO)CC3)n2C)c(=O)n1CC(=O)c1ccccc1	3.28884	0	0.2375	-0.2375	TN	0.0663	YES
-	3685	CC(C)CC1C(=O)OC(Cc2ccc(N3CCOCC3)cc2)C(=O)N(C)C(CC(C)C)C(=O)OC(C)C(=O)N(C)C(CC(C)C)C(=O)OC(Cc2ccc(N3CCOCC3)cc2)C(=O)N(C)C(CC(C)C)C(=O)OC(C)C(=O)N1C	8.05262	1	0.408	0.592	FN	0.0829	YES
+	432	COc1ncnc(NS(=O)(=O)c2ccc(N)cc2)c1OC	-8.04486	0	-0.1679	0.1679	TN	3.028	No
-	3708	COc1cc(N2CCN(C)CC2)ccc1Nc1ncc2c(n1)N(C)c1ccccc1C(=O)N2	17.166	1	0.734	0.266	TP	1.0487	No
-	3670	COC1CC(C(=O)c2ccc3c(N)ncc(-c4ccc(-c5cnn(C)c5)cc4)c3n2)C1	10.7164	0	0.5032	-0.5032	FP	0.1058	YES
#	3714	CC(C)(O)CNc1ncc(-c2ccnc(Nc3ccncc3)n2)c(CC2CC2)n1	15.2702	1	0.6662	0.3338	TP	0.0492	YES
-	3609	CCCCCCCCCCC(=O)OC1CCC2C3CCC4=CC(=O)CCC4(C)C3CCC12C	8.33344	0	0.418	-0.418	TN	0.0405	YES
+	3721	CC1(C)C(=O)N(c2ccc(C#N)c(C(F)(F)F)c2)C(=S)N1Cc1ccc(-c2cn[nH]n2)cc1	7.27454	1	0.3801	0.6199	FN	0.0744	YES
#	2933	CCc1c(O)cc(O)c(C(=O)c2ccc(OCCN3CCOCC3)c(OC)c2)c1CC(=O)N(CCOC)CCOC	3.38556	0	0.241	-0.241	TN	0.0425	YES
+	3725	CCc1ccc(N(CC(C)C)S(=O)(=O)c2ccc(OCC3CCOCC3)c(CO)c2)cc1	14.4193	1	0.6357	0.3643	TP	0.0415	YES
*	2509	C1Cc2[nH]nc(-c3nn[nH]n3)c2C1	-2.83533	0	0.0184	-0.0184	TN	0.0209	YES
#	3732	c1ccc2c(-c3cnn4cc(-c5ccc(OCCN6CCOCC6)cc5)cnc34)ccnc2c1	19.4866	1	0.817	0.183	TP	0.104	YES
+	3229	Cc1[nH]c(C=C2C(=O)Nc3ccc(F)cc32)c(C)c1C(=O)NCC(O)CN1CCOCC1	7.87722	0	0.4017	-0.4017	TN	0.0436	YES
*	3739	CCCCCCCC(=O)NC(CN1CCCC1)C(O)c1ccc2c(c1)OCCO2	12.8873	1	0.5809	0.4191	TP	0.0304	YES
+	3768	Cc1cc(O)cc2c1C1(C)CCC3C(C)(C)CCCC3(C)C1C2	14.7507	0	0.6476	-0.6476	FP	1.0294	No
+	3742	C=CC(=O)NC1CCOCC1Nc1ncc2cc(-c3c(Cl)c(OC)cc(OC)c3Cl)ccc2n1	14.951	1	0.6547	0.3453	TP	3.0485	No
+	1166	NC(CSC(c1ccccc1)(c1ccccc1)c1ccccc1)C(=O)O	5.70826	0	0.3241	-0.3241	TN	0.0416	YES
*	3747	Cn1cc(-c2ccc(-c3cncc(Cl)c3N3CCC4(CCNC4=O)CC3)cc2)cn1	22.8544	1	0.9375	0.0625	TP	1.0557	No
-	1314	COc1cc(-c2oc3cc(O)cc(O)c3c(=O)c2O)ccc1O	7.59705	0	0.3917	-0.3917	TN	1.0389	No
#	3755	CONC(=O)Nc1ccc(-c2sc3c(c2CN(C)Cc2ccccc2)c(=O)n(-c2ccccc2)c(=O)n3Cc2c(F)cccc2F)cc1	21.8555	1	0.9017	0.0983	TP	0.0902	YES
-	50	CC(=O)Nc1nnc(S(N)(=O)=O)s1	5.11839	0	0.303	-0.303	TN	0.0252	YES
-	3759	c1ccc(-c2cc(CCC3CCNCC3)c3ccccc3n2)cc1	12.9904	1	0.5846	0.4154	TP	0.0363	YES
+	2066	CCN1C(=O)c2ccccc2C1Nc1ccc(OCCN2CCCCC2)cc1	14.727	0	0.6467	-0.6467	FP	0.0333	YES
-	3776	COc1cc(C(=O)NC(=N)Nc2ccc(C)c(NC(=O)c3ccc(-c4ccccc4)cc3)c2)cc(OC)c1OC	13.8274	1	0.6145	0.3855	TP	0.0725	YES
+	2296	COc1ccc(C=CC(=O)O)cc1O	-0.50201	0	0.1019	-0.1019	TN	0.0151	YES
#	3779	CC(C(=O)Nc1ccc(Cl)cc1)C1CCC(c2ccnc3ccc(F)cc23)CC1	14.4719	1	0.6376	0.3624	TP	0.0365	YES
*	2712	NC(C(=O)O)C(O)c1ccc(O)c(O)c1	-0.2358	0	0.1114	-0.1114	TN	0.0175	YES
-	3794	Cc1cc2cc(Oc3ccnc(Nc4cccc(CS(=O)(=O)NCCN(C)C)c4)n3)ccc2[nH]1	15.655	1	0.6799	0.3201	TP	0.0658	YES
*	3596	COc1ccc2c(c1)C1CC1(C(=O)N1C3CCC1CN(C)C3)Cn1c-2c(C2CCCCC2)c2ccc(C(=O)NS(=O)(=O)N(C)C)cc21	-10.3689	0	-0.2511	0.2511	TN	6.0682	No
#	3795	O=C(C=Cc1ccc(Cl)cc1)N1CCC2(CC1)CN(Cc1ccc(Cl)c(Cl)c1)C(=O)O2	20.065	1	0.8377	0.1623	TP	0.0445	YES
#	1410	CC(C)(C)C(=O)OCOP(=O)(COCCn1cnc2c(N)ncnc21)OCOC(=O)C(C)(C)C	4.77222	0	0.2906	-0.2906	TN	0.0533	YES
-	3806	Cc1cc(OC(CCC(F)(F)F)c2ccc(C(=O)NCCC(=O)O)cc2)cc(C)c1-c1ccc(C(C)(C)C)cc1	10.0202	1	0.4783	0.5217	FN	0.059	YES
*	2058	CC(=O)SCC(CC(=O)c1ccc(C)cc1)C(=O)O	-8.51459	0	-0.1847	0.1847	TN	0.0186	YES
-	3809	CCNCCc1ccc(CN(CC)c2cc(OC)ccc2C2CCc3cc(O)ccc3C2)cc1	18.618	1	0.7859	0.2141	TP	1.047	No
*	815	CC(CCC(=O)O)C1CCC2C3CCC4CC(O)CCC4(C)C3CC(O)C12C	-6.36018	0	-0.1077	0.1077	TN	0.035	YES
*	3823	CC1CC(N)CC(c2ccncc2NC(=O)c2ccc(F)c(-c3c(F)cccc3F)n2)C1	22.068	1	0.9093	0.0907	TP	1.0536	No
#	1197	CC1(S(=O)(=O)O)CC(=O)c2ccccc2C1=O	3.05521	0	0.2292	-0.2292	TN	0.0205	YES
+	3840	CC1=C(c2ccc(O)cc2)C(c2ccc(OCCN3CCCCC3)cc2)Oc2cc(O)ccc21	11.0031	1	0.5135	0.4865	TP	0.042	YES
*	1121	C=CCCCCCCCCC(=O)O	2.01521	0	0.192	-0.192	TN	0.0094	YES
*	3841	CCN(CC)CCNc1ccc(C)c2sc3ccccc3c(=O)c12	13.9832	1	0.6201	0.3799	TP	0.0319	YES
-	1106	CC(C)(O)C(Cl)(Cl)Cl	8.27846	0	0.416	-0.416	TN	0.0093	YES
#	3848	CC(C)(O)C1CCC(Nc2ccc3ncc(-c4cccc(C(F)(F)F)c4)n3n2)CC1	22.2785	1	0.9169	0.0831	TP	0.0695	YES
+	2896	NC1(Cc2ccc(Cl)cc2)CCN(c2ncnc3[nH]ccc23)CC1	12.789	0	0.5774	-0.5774	FP	0.0333	YES
+	3913	Cc1cc(O)ccc1C(C)(C)C	11.5417	1	0.5328	0.4672	TP	0.0162	YES
-	500	CCOc1cc(CC(=O)NC(CC(C)C)c2ccccc2N2CCCCC2)ccc1C(=O)O	7.3113	0	0.3814	-0.3814	TN	0.0347	YES
#	3951	Cc1ccc(NCCN(C)CCNc2ccnc3cc(Cl)ccc23)c2c(=O)c3ccccc3sc12	30.1913	1	1.2	-0.2	TP	0.0508	YES
+	3271	O=C(CCl)Nc1cccc(NC2=NS(=O)(=O)c3ccccc32)c1	-7.37023	0	-0.1438	0.1438	TN	4.0329	No
+	3953	CCCCOCCOc1ccc(-c2ccc3c(c2)/C=C(/C(=O)Nc2ccc(S(=O)Cc4cncn4CCC)cc2)CCCN3CC(C)C)cc1	18.0513	1	0.7657	0.2343	TP	2.0887	No
-	2982	O=C(CCCCCCC(=O)Nc1ccc(C2OC(CSc3nc(-c4ccccc4)c(-c4ccccc4)o3)CC(c3ccc(CO)cc3)O2)cc1)NO	4.99007	0	0.2984	-0.2984	TN	1.1143	No
#	3954	N#CC1(c2ccc3c(N)ncnn23)OC(CO)C(O)C1O	5.33935	1	0.3109	0.6891	FN	0.0364	YES
+	3439	CCOC(=O)C(N)Cc1ccc(-c2cc(OC(c3ccc(Cl)cc3-n3ccc(C)n3)C(F)(F)F)nc(N)n2)cc1	-3.65288	0	-0.0108	0.0108	TN	4.0723	No
-	3956	CCC(CC)COC(=O)C(C)NP(=O)(OCC1OC(C#N)(c2ccc3c(N)ncnn23)C(O)C1O)Oc1ccccc1	13.9288	1	0.6182	0.3818	TP	0.0741	YES
*	1155	CC1CC(OC(=O)C(O)c2ccccc2)CC(C)(C)C1	13.1239	0	0.5894	-0.5894	FP	0.0205	YES

## Sheet: Table S3
Set	ID	SMILES	DCW	Expr	Calc	Expr-Calc	Class	DefectSMILES	Applicability
-	6	CN1CCN(CCCN2c3ccccc3Sc3ccc(C(F)(F)F)cc32)CC1	33.1277	1	0.8156	0.1844	TP	0.0602	YES
*	219	Cc1ncc(CNC(=O)N(CCCl)N=O)c(N)n1	-0.91499	0	0.1482	-0.1482	TN	1.0285	No
*	10	CN1C2CCC1CC(OC(c1ccccc1)c1ccccc1)C2	28.9139	1	0.733	0.267	TP	0.0426	YES
*	975	Cc1ccccc1OCC(O)CO	3.67158	0	0.2381	-0.2381	TN	0.0152	YES
#	13	CN(C)CCC=C1c2ccccc2Sc2ccc(Cl)cc21	35.7713	1	0.8675	0.1325	TP	0.0452	YES
*	1059	Nc1ncnc2c1nc(Cl)n2C1OC(CO)C(O)C1O	5.97775	0	0.2834	-0.2834	TN	2.0393	No
#	15	c1cc(-c2sc(-c3ccncc3)c(-c3ccncc3)c2-c2ccncc2)ccn1	33.264	1	0.8183	0.1817	TP	0.0638	YES
-	769	N=C(Nc1ccccc1)Nc1ccccc1	19.893	0	0.5562	-0.5562	FP	0.0382	YES
*	16	CN(C)CCC=C1c2ccccc2C=Cc2ccccc21	31.0503	1	0.7749	0.2251	TP	0.0475	YES
+	3456	Cc1ccccc1-c1cc(N2CCN(C)CC2)ncc1N(C)C(=O)C(C)(C)c1cc(C(F)(F)F)cc(C(F)(F)F)c1	15.8682	0	0.4773	-0.4773	TN	0.0753	YES
*	20	CN(C)c1ccccc1CN1CCCN(Cc2ccccc2N(C)C)C1c1ccncc1	25.724	1	0.6705	0.3295	TP	0.052	YES
+	3918	CC(C)(C)NCC(O)COc1ccccc1C#N	7.20231	0	0.3074	-0.3074	TN	1.0214	No
*	21	CN1CCC(CN2c3ccccc3Sc3ccccc32)C1	32.3558	1	0.8005	0.1995	TP	0.0442	YES
+	259	Nc1nc2ccc(OC(F)(F)F)cc2s1	15.1791	0	0.4637	-0.4637	TN	1.0319	No
*	22	CNCCC=C1c2ccccc2CCc2ccccc21	32.2417	1	0.7983	0.2017	TP	0.0366	YES
-	387	COc1c2occc2cc2ccc(=O)oc12	13.9589	0	0.4398	-0.4398	TN	1.034	No
+	25	O=C1CSC2(CCN(CCCN3c4ccccc4Sc4ccc(Cl)cc43)CC2)N1	59.7367	1	1.3373	-0.3373	TP	4.0995	No
*	86	C[N+](C)(C)CCO	1.70044	0	0.1995	-0.1995	TN	0.0072	YES
+	34	Clc1ccc2c(c1)C(N1CCNCC1)=Nc1ccccc1O2	40.5555	1	0.9613	0.0387	TP	2.0519	No
#	2136	C=CC[N+]1(C2CC3C4CCC5CC(OC(C)=O)C(N6CCCCC6)CC5(C)C4CCC3(C)C2OC(=O)CC)CCCCC1	12.4437	0	0.4101	-0.4101	TN	0.1089	YES
#	56	CN(C)CCC=C1c2ccccc2CCc2ccccc21	29.944	1	0.7532	0.2468	TP	0.0383	YES
-	413	COc1cnc(NS(=O)(=O)c2ccc(N)cc2)nc1	-13.2276	0	-0.0932	0.0932	TN	0.0327	YES
#	57	CCCCc1oc2ccccc2c1C(=O)c1cc(I)c(OCCN(CC)CC)c(I)c1	31.1333	1	0.7765	0.2235	TP	0.0458	YES
*	755	CNC(=O)OCc1cccc(COC(=O)NC)n1	1.82039	0	0.2019	-0.2019	TN	0.0295	YES
*	72	CC(C)COCC(CN(Cc1ccccc1)c1ccccc1)N1CCCC1	26.3506	1	0.6828	0.3172	TP	0.0476	YES
+	3929	CCc1ccc(Nc2c(F)c(F)cc(F)c2F)c(CC(=O)O)c1	8.9309	0	0.3413	-0.3413	TN	0.0306	YES
#	99	CN1CCC(=C2c3ccccc3C=Cc3ccccc32)CC1	31.1812	1	0.7775	0.2225	TP	0.0553	YES
-	3608	COc1cc(C(CC(=O)O)c2ccc(C)c(CN3CC(C)Oc4ccccc4S3(=O)=O)c2)cc2nnn(C)c12	1.2425	0	0.1905	-0.1905	TN	2.0836	No
*	100	CN1CCN(C2=Nc3cc(Cl)ccc3Nc3ccccc32)CC1	69.1178	1	1.5212	-0.5212	TP	0.0561	YES
#	1969	Cc1cc(O)c2c(O)c3c(O)cccc3cc2c1	9.24143	0	0.3473	-0.3473	TN	0.0256	YES
-	101	CCN(CC)CCCC(C)Nc1ccnc2cc(Cl)ccc12	17.5807	1	0.5108	0.4892	TP	0.0312	YES
#	1742	CCN(CC)C(=O)N1CCN(C)CC1	4.68411	0	0.258	-0.258	TN	0.0209	YES
*	104	CN(C)CCCN1c2ccccc2CCc2ccc(Cl)cc21	30.1429	1	0.7571	0.2429	TP	0.036	YES
-	1166	NC(CSC(c1ccccc1)(c1ccccc1)c1ccccc1)C(=O)O	24.3113	0	0.6428	-0.6428	FP	0.0587	YES
#	106	CN(C)CCCN1c2ccccc2Sc2ccc(Cl)cc21	32.6588	1	0.8064	0.1936	TP	0.0412	YES
*	2707	O=C1OC(CO)C(O)C(O)C1O	7.78464	0	0.3188	-0.3188	TN	0.0204	YES
*	116	CNCCCN1c2ccccc2CCc2ccccc21	29.1291	1	0.7372	0.2628	TP	0.0326	YES
-	1848	CN1C2CCC1CC(OC(=O)C(O)c1ccccc1)C2	14.5379	0	0.4512	-0.4512	TN	0.0316	YES
+	121	CCN(CC)CCOC(=O)C1(C2CCCCC2)CCCCC1	14.7832	1	0.456	0.544	FN	0.0311	YES
#	2266	COc1nc(C)cnc1NS(=O)(=O)c1cccnc1-c1ccc(-c2nnco2)cc1	14.0502	0	0.4416	-0.4416	TN	0.0607	YES
+	129	O=c1c2ccccc2[se]n1-c1ccccc1	22.4722	1	0.6067	0.3933	TP	1.0299	No
*	3335	O=c1sn(-c2cccc3ccccc23)c(=O)n1Cc1ccccc1	15.0486	0	0.4612	-0.4612	TN	0.0454	YES
-	133	CNCCC(Oc1ccc(C(F)(F)F)cc1)c1ccccc1	20.8309	1	0.5746	0.4254	TP	0.0403	YES
+	3330	CCCc1ccc(OCC(=O)N(Cc2nc(-c3cccnc3)no2)C(C)C)cc1	3.80018	0	0.2407	-0.2407	TN	1.0445	No
*	152	O=C1Nc2ccc(I)cc2C1=Cc1cc(Br)c(O)c(Br)c1	66.4306	1	1.4685	-0.4685	TP	0.0514	YES
*	2081	COc1cc(NS(=O)(=O)c2ccc(N)cc2)nc(C)n1	-8.00016	0	0.0093	-0.0093	TN	0.0389	YES
+	166	O=S(=O)(c1cccc2c(I)cccc12)N1CCCNCC1	23.8125	1	0.633	0.367	TP	1.0388	No
+	1822	CN(CCCCCCCCCCN(C)C(=O)Oc1cccc([N+](C)(C)C)c1)C(=O)Oc1cccc([N+](C)(C)C)c1	17.2294	0	0.5039	-0.5039	FP	0.0533	YES
*	169	CN(C)CCCN1c2ccccc2CCc2ccccc21	26.8314	1	0.6922	0.3078	TP	0.0343	YES
#	3663	O=C(O)C1OC(O)C(O)C(O)C1O	-1.29417	0	0.1408	-0.1408	TN	0.0204	YES
-	177	CCCc1c(OCCCOc2ccc(OCC(=O)O)cc2)ccc(C(C)=O)c1O	14.2266	1	0.4451	0.5549	FN	0.0365	YES
*	756	O=C(Nc1ccccc1)c1ccccc1O	17.3871	0	0.507	-0.507	FP	0.0333	YES
+	181	CN(C)C(=O)C(CCN1CCC(O)(c2ccc(Cl)cc2)CC1)(c1ccccc1)c1ccccc1	33.0008	1	0.8131	0.1869	TP	0.0688	YES
+	1498	c1ccc(CNCCNCc2ccccc2)cc1	18.9848	0	0.5384	-0.5384	FP	0.0243	YES
#	185	CCOC(=O)N1CCC(=C2c3ccc(Cl)cc3CCc3cccnc32)CC1	27.2762	1	0.7009	0.2991	TP	0.0583	YES
#	2058	CC(=O)SCC(CC(=O)c1ccc(C)cc1)C(=O)O	-2.69276	0	0.1134	-0.1134	TN	0.0276	YES
#	208	CNCCCC12CCC(c3ccccc31)c1ccccc12	29.9766	1	0.7539	0.2461	TP	0.0336	YES
*	501	COC1CC(OC2C(C)C(=O)OC(C)C(C)C(OC(C)=O)C(C)C(=O)C3(CO3)CC(C)C(OC3OC(C)CC(N(C)C)C3OC(C)=O)C2C)OC(C)C1OC(C)=O	4.64868	0	0.2573	-0.2573	TN	0.096	YES
*	212	COc1ccccc1N1CCN(CC(O)COc2cccc3ccccc23)CC1	33.9376	1	0.8315	0.1685	TP	0.0411	YES
+	2700	CC(NC1CCCCC1NC(=O)c1ccc(Cl)cc1)c1cccc2ccccc12	31.9402	0	0.7923	-0.7923	FP	0.0482	YES
+	216	COC(=O)C1=C(C)NC(C)=C(C(=O)OCCN(C)Cc2ccccc2)C1c1cccc([N+](=O)[O-])c1	17.6684	1	0.5126	0.4874	TP	0.0565	YES
+	3449	COc1cc(O)c(CC=C(C)C)c2c1C(=O)CC(c1ccc(O)cc1)O2	9.30837	0	0.3487	-0.3487	TN	0.044	YES
-	222	CCN(CC)CC#CCOC(=O)C(O)(c1ccccc1)C1CCCCC1	20.5616	1	0.5693	0.4307	TP	0.0381	YES
*	3420	NC1=NC(=O)N2CC12	-8.79803	0	-0.0063	0.0063	TN	0.0171	YES
-	223	Cc1ccccc1C(OCCN(C)C)c1ccccc1	19.5795	1	0.55	0.45	TP	0.0247	YES
+	3452	CC(=O)NC1CSSCC(C(N)=O)NC(=O)C(C(C)C)NC(=O)C(C)NC(=O)C(Cc2cnc[nH]2)NC1=O	-18.3734	0	-0.194	0.194	TN	2.0605	No
-	224	O=c1[nH]c2ccccc2n1CCCN1CCN(C(c2ccccc2)c2ccccc2)CC1	28.1136	1	0.7173	0.2827	TP	0.0483	YES
*	3822	Cc1cnc(NC(=O)c2cc(Oc3cnc(C(=O)N(C)C)nc3)c3cc(C)oc3c2)cn1	0.16782	0	0.1695	-0.1695	TN	1.0589	No
#	233	CC(CN1c2ccccc2Sc2ccccc21)N(C)C	30.1543	1	0.7573	0.2427	TP	0.0422	YES
*	3737	NCCCC(NC(=O)C1CCCN1C(=O)C1CSSCC(N)C(=O)NC(Cc2ccc(O)cc2)C(=O)NC(Cc2ccccc2)C(=O)NC(CCC(N)=O)C(=O)NC(CC(N)=O)C(=O)N1)C(=O)NCC(N)=O	-7.48396	0	0.0194	-0.0194	TN	2.1177	No
-	235	CCCNCC(O)COc1ccccc1C(=O)CCc1ccccc1	18.6583	1	0.532	0.468	TP	0.0273	YES
+	398	O=C(O)c1ccccc1Nc1cccc(C(F)(F)F)c1	17.5205	0	0.5097	-0.5097	FP	0.0386	YES
*	239	OCCN1CCN(CCCN2c3ccccc3Sc3ccc(Cl)cc32)CC1	38.8028	1	0.9269	0.0731	TP	0.0532	YES
*	2360	CC(=NNC(=O)c1ccncc1)C(=O)O	-0.81717	0	0.1501	-0.1501	TN	0.0267	YES
#	240	CN(C)CCCN1c2ccccc2Sc2ccccc21	29.3473	1	0.7415	0.2585	TP	0.0395	YES
-	2319	OCC1OC(OC2(CCl)OC(CCl)C(O)C2O)C(O)C(O)C1Cl	4.79205	0	0.2601	-0.2601	TN	0.0402	YES
+	246	CCC(=O)c1ccc2c(c1)N(CCCN(C)C)c1ccccc1S2	25.0871	1	0.658	0.342	TP	0.0438	YES
#	2118	CCOC(=O)CNC(C(=O)N1CCC1C(=O)NCc1ccc(C(=N)NO)cc1)C1CCCCC1	10.0628	0	0.3634	-0.3634	TN	0.0565	YES
#	250	CNCCCC1c2ccccc2C=Cc2ccccc21	30.028	1	0.7549	0.2451	TP	0.0411	YES
+	537	O=S(=O)(c1cccc2cnccc12)N1CCCNCC1	13.9058	0	0.4388	-0.4388	TN	1.0384	No
*	252	CN1CCN(CCCN2c3ccccc3Sc3ccc(Cl)cc32)CC1	36.064	1	0.8732	0.1268	TP	0.0504	YES
*	2189	O=C(c1ccccc1)c1ccc2n1CCC2C(=O)O	10.2342	0	0.3668	-0.3668	TN	0.0366	YES
#	262	COC(=O)C1C2CC3c4[nH]c5cc(OC)ccc5c4CCN3CC2CC(OC(=O)c2cc(OC)c(OC)c(OC)c2)C1OC	37.884	1	0.9089	0.0911	TP	0.1144	YES
-	175	CC(CCc1ccccc1)NCC(O)c1ccc(O)c(C(N)=O)c1	10.7863	0	0.3776	-0.3776	TN	0.0359	YES
-	263	O=C(c1ccc(OCCN2CCCCC2)cc1)c1c(-c2ccc(O)cc2)sc2cc(O)ccc12	24.4885	1	0.6463	0.3537	TP	0.0665	YES
*	3238	N=C(N)NCCCC(NC(=O)C1CCCN1C(=O)C1CSSCCC(=O)NC(Cc2ccc(O)cc2)C(=O)NC(Cc2ccccc2)C(=O)NC(CCC(N)=O)C(=O)NC(CC(N)=O)C(=O)N1)C(=O)NCC(N)=O	-6.08714	0	0.0468	-0.0468	TN	2.1249	No
#	278	Oc1ccc(-c2nc(-c3ccncc3)c(-c3ccc(F)cc3)[nH]2)cc1	32.8229	1	0.8097	0.1903	TP	0.04	YES
-	1546	CC1=C(C(=O)OC(C)C)C(c2cccc([N+](=O)[O-])c2)C(C(=O)OC2CN(C(c3ccccc3)c3ccccc3)C2)=C(N)N1	21.0612	0	0.5791	-0.5791	FP	0.0752	YES
+	279	O=C(CCCN1CCC2(CC1)C(=O)NCN2c1ccccc1)c1ccc(F)cc1	25.1144	1	0.6585	0.3415	TP	1.0541	No
+	3326	Cc1cc(N2CCOCC2)ccc1Nc1nc(NC2CCCCC2)c2[nH]cnc2n1	14.9381	0	0.459	-0.459	TN	0.0491	YES
-	288	CN1CCN(CCC=C2c3ccccc3Sc3ccc(S(=O)(=O)N(C)C)cc32)CC1	31.6657	1	0.787	0.213	TP	0.0659	YES
#	1628	CC1CCCCN1CCCOC(=O)c1ccccc1	16.8244	0	0.496	-0.496	TN	0.0233	YES
#	291	OC(CCN1CCCCC1)(c1ccccc1)C1CCCCC1	24.9351	1	0.655	0.345	TP	0.0398	YES
#	754	COC(=O)c1cncn1C(C)c1ccccc1	1.71966	0	0.1999	-0.1999	TN	0.0212	YES
#	294	CN(C)CCCN1c2ccccc2Sc2ccc(C(F)(F)F)cc21	29.7225	1	0.7489	0.2511	TP	0.051	YES
#	803	O=C(O)C=CC(=O)O	-8.47342	0	0	0	TN	0.011	YES
*	295	CC(CN(C)C)CN1c2ccccc2CCc2ccccc21	27.7818	1	0.7108	0.2892	TP	0.0361	YES
#	860	CC=Cc1ccc(O)c(OC)c1	3.02179	0	0.2254	-0.2254	TN	0.0184	YES
+	297	Nc1nc(N)c2nc(-c3ccccc3)c(N)nc2n1	12.995	1	0.4209	0.5791	FN	0.0392	YES
*	1108	Cc1c(I)c(=O)n(-c2ccccc2)n1C	2.42222	0	0.2137	-0.2137	TN	0.0284	YES
-	355	CCCCOc1cc(C(=O)NCCN(CC)CC)c2ccccc2n1	14.4814	1	0.4501	0.5499	FN	0.0318	YES
#	3804	O=C(CBr)N1CC([N+](=O)[O-])([N+](=O)[O-])C1	1.42733	0	0.1941	-0.1941	TN	0.0214	YES
+	372	CN(C(=O)CN(CCO)CC(=O)N(C)C(C)(C)Cc1ccccc1)C(C)(C)Cc1ccccc1	15.8523	1	0.4769	0.5231	FN	0.0488	YES
-	1093	CCCCCCCCCCCCCCCCCCCCCCO	21.2954	0	0.5837	-0.5837	FP	0.0169	YES
#	380	CN(C)CCCOc1nn(Cc2ccccc2)c2ccccc12	20.1482	1	0.5612	0.4388	TP	0.044	YES
#	2712	NC(C(=O)O)C(O)c1ccc(O)c(O)c1	-4.57894	0	0.0764	-0.0764	TN	0.0202	YES
#	417	CN(C)CCC=C1c2ccccc2CSc2ccccc21	30.9201	1	0.7724	0.2276	TP	0.0463	YES
-	1034	Oc1cc2c(cc1O)C1c3ccc(O)c(O)c3OCC1(O)C2	7.97703	0	0.3226	-0.3226	TN	0.0518	YES
*	427	CC(C)N=c1cc2n(-c3ccc(Cl)cc3)c3ccccc3nc-2cc1Nc1ccc(Cl)cc1	37.8175	1	0.9076	0.0924	TP	0.0647	YES
+	2859	CCCC(NC(=O)C1C2CCCC2CN1C(=O)C(NC(=O)C(NC(=O)c1cnccn1)C1CCCCC1)C(C)(C)C)C(=O)C(=O)NC1CC1	11.8722	0	0.3989	-0.3989	TN	0.0732	YES
-	434	CCCCc1cc2ccccc2c(OCCN(C)C)n1	20.1292	1	0.5608	0.4392	TP	0.0266	YES
#	2708	O=C(CO)C(O)C(O)C(O)CO	-7.73701	0	0.0145	-0.0145	TN	0.0116	YES
+	435	CCN(CC)CCNc1ccc(CO)c2sc3ccccc3c(=O)c12	28.8996	1	0.7327	0.2673	TP	0.0496	YES
-	144	CC(C)C(=O)Nc1ccc([N+](=O)[O-])c(C(F)(F)F)c1	8.10676	0	0.3251	-0.3251	TN	0.0357	YES
*	438	CC(=O)c1ccc2c(c1)N(CCCN(C)C)c1ccccc1S2	24.1186	1	0.639	0.361	TP	0.0431	YES
*	826	COC(=O)c1ccccc1O	6.47367	0	0.2931	-0.2931	TN	0.0145	YES
*	442	CC(=O)c1ccc2c(c1)N(CCCN1CCC(CCO)CC1)c1ccccc1S2	32.8826	1	0.8108	0.1892	TP	0.0565	YES
-	2549	Nc1nccc(Oc2ccc(NC(=O)c3c[nH]cc(-c4ccc(F)cc4)c3=O)cc2F)c1Cl	8.32183	0	0.3293	-0.3293	TN	0.0728	YES
-	452	CN1CCCC1CCOC(C)(c1ccccc1)c1ccc(Cl)cc1	32.7926	1	0.8091	0.1909	TP	0.0428	YES
#	2379	CCOc1c(N2CCOCC2)cnn(C)c1=O	4.58958	0	0.2561	-0.2561	TN	0.0411	YES
+	508	CCN(CC)Cc1cc(Nc2ccnc3cc(Cl)ccc23)ccc1O	26.2114	1	0.68	0.32	TP	0.0391	YES
#	2327	Cc1ccc(-n2c(C)cc(-c3nnc4n3CCCCC4)c2C)cc1	6.35136	0	0.2907	-0.2907	TN	0.0618	YES
-	510	COc1cc(C=CC(=O)C=C(O)C=Cc2ccc(O)c(OC)c2)ccc1O	7.51007	1	0.3134	0.6866	FN	0.0422	YES
*	303	CC(C)(C)NCC(O)c1ccccc1Cl	7.83406	0	0.3198	-0.3198	TN	0.0201	YES
*	532	COc1cc2c3cc1Oc1c(OC)c(OC)cc4c1C(Cc1ccc(O)c(c1)Oc1ccc(cc1)CC3N(C)CC2)N(C)CC4	35.5262	1	0.8627	0.1373	TP	0.0915	YES
+	1223	CCCCCCCCCCCCCCCCCC(=O)O[Al](O)O	2.21456	0	0.2096	-0.2096	TN	0.0175	YES
*	533	COc1ccc2cc1Oc1ccc(cc1)CC1c3cc(c(OC)cc3CCN1C)Oc1c(OC)c(OC)cc3c1C(C2)N(C)CC3	38.1642	1	0.9144	0.0856	TP	0.076	YES
#	2725	CC1OC(OC2C=C3CCC4C(CCC5(C)C(c6ccc(=O)oc6)CCC45O)C3(C)CC2)C(O)C(O)C1O	11.8799	0	0.3991	-0.3991	TN	0.1006	YES
-	538	Fc1ccc(C(c2ccc(F)cc2)N2CCN(CC=Cc3ccccc3)CC2)cc1	22.0952	1	0.5993	0.4007	TP	0.0473	YES
+	638	COC1(NC(=O)CSCC#N)C(=O)N2C(C(=O)O)=C(CSc3nnnn3C)CSC21	-28.6761	0	-0.396	0.396	TN	0.0767	YES
#	550	COc1cc2nc(N3CCN(C(=O)C4COc5ccccc5O4)CC3)nc(N)c2cc1OC	21.1546	1	0.5809	0.4191	TP	0.0912	YES
-	3413	CC1(C)SC2C(NC(=O)C(C(=O)O)c3ccsc3)C(=O)N2C1C(=O)O	3.59988	0	0.2367	-0.2367	TN	0.0607	YES
-	582	C1CCC(C(CC2CCCCN2)C2CCCCC2)CC1	10.3445	1	0.369	0.631	FN	0.0266	YES
*	3461	COc1ccc(C(=O)C2CCN(CC(=O)N(Cc3nc(=O)c4c([nH]3)CCOC4)CC3CC3)CC2)cc1	-6.35148	0	0.0416	-0.0416	TN	0.0739	YES
*	584	CN1CCCN(C(c2ccccc2)c2ccc(Cl)cc2)CC1	26.134	1	0.6785	0.3215	TP	0.0317	YES
*	335	NC(Cc1ccc(O)c(O)c1)C(=O)O	-2.17733	0	0.1235	-0.1235	TN	0.0219	YES
#	592	CCN(CCCc1ccccc1)CCCc1ccccc1	23.4412	1	0.6257	0.3743	TP	0.0261	YES
#	2890	CC(C)(O)C1CCC(C)(C2C(O)CC3(C)C4CC(OC5OC(CO)C(O)C(O)C5O)C5C(C)(C)C(OC6OCC(O)C(O)C6O)CCC56CC46CCC23C)O1	2.89751	0	0.223	-0.223	TN	0.12	YES
*	596	CN1CCN(C2=Nc3ccccc3Oc3ccc(Cl)cc32)CC1	63.8758	1	1.4184	-0.4184	TP	0.0587	YES
-	1038	CC1CCC(C(C)C)C(=O)C1	6.38277	0	0.2913	-0.2913	TN	0.0085	YES
*	597	O=C(c1ccc(F)cc1)C1CCN(CCn2c(=O)[nH]c3ccccc3c2=O)CC1	33.8381	1	0.8296	0.1704	TP	0.0515	YES
*	2351	CC(C)C(=O)Nc1cccc(C2CN3CCSC3=N2)c1	4.32447	0	0.2509	-0.2509	TN	0.0393	YES
+	605	CCCCCC(=O)OC1(C(C)=O)CCC2C3CCC4=CC(=O)CCC4(C)C3CCC21C	20.9603	1	0.5771	0.4229	TP	0.0534	YES
*	577	COC(=O)CCC(=O)CN	-2.74095	0	0.1124	-0.1124	TN	0.0098	YES
-	681	C=C1C(=O)OC2C1CCC(C)=CCCC1(C)OC21	20.6789	1	0.5716	0.4284	TP	0.0395	YES
-	1777	CCC1(c2cccc(O)c2)CCCCN(C)C1	11.6577	0	0.3947	-0.3947	TN	0.0272	YES
-	687	CNCCCCOc1ccccc1Cc1ccccc1	15.3402	1	0.4669	0.5331	FN	0.0246	YES
-	3013	CCNc1cc(NC2CCC(O)CC2)nc(Nc2ccc3c(ccn3Cc3ccccc3)c2)n1	9.01663	0	0.3429	-0.3429	TN	0.0609	YES
*	693	CCC(=C(c1ccccc1)c1ccc(OCCN(C)C)cc1)c1ccccc1	33.3098	1	0.8192	0.1808	TP	0.0493	YES
*	75	O=C1CC2(CCCC2)CC(=O)N1CCCCN1CCN(c2ncccn2)CC1	11.0238	0	0.3823	-0.3823	TN	0.0451	YES
#	695	Clc1ccc2c(c1)N=C(N1CCNCC1)c1ccccc1N2	22.2049	1	0.6015	0.3985	TP	0.051	YES
+	2404	CC(C)CC(NC(=O)c1cc2ccccc2s1)C(=O)N1CCN(C(=O)C(CO)NS(=O)(=O)c2ccc(Cl)cc2Cl)CC1	21.4044	0	0.5858	-0.5858	FP	2.0806	No
-	776	CCC(=C(CC)c1ccc(O)cc1)c1ccc(O)cc1	13.9967	1	0.4406	0.5594	FN	0.031	YES
+	3866	CCCCOc1ccc(C[N+]2(C)C3CCC2CC(OC(=O)C(CO)c2ccccc2)C3)cc1	14.2678	0	0.4459	-0.4459	TN	0.0411	YES
-	778	CCC1OC(=O)C(C)C(OC2CC(C)(OC)C(O)C(C)O2)C(C)C(OC2OC(C)CC(N(C)C)C2O)C(C)(O)CC(C)CN(C)C(C)C(O)C1(C)O	21.8517	1	0.5946	0.4054	TP	0.0946	YES
*	1853	CC(=O)CC(c1ccc([N+](=O)[O-])cc1)c1c(O)c2ccccc2oc1=O	17.9933	0	0.5189	-0.5189	FP	1.0486	No
+	784	CC(=O)Oc1ccccc1C(=O)Nc1ncc([N+](=O)[O-])s1	18.6607	1	0.532	0.468	TP	0.0399	YES
+	1314	COc1cc(-c2oc3cc(O)cc(O)c3c(=O)c2O)ccc1O	12.059	0	0.4026	-0.4026	TN	2.047	No
*	785	Cc1c(O)cccc1C(=O)NC(CSc1ccccc1)C(O)CN1CC2CCCCC2CC1C(=O)NC(C)(C)C	25.1961	1	0.6601	0.3399	TP	0.0629	YES
-	2797	Cc1cc(C#N)cc(C)c1Oc1nc(Nc2ccc(C#N)cc2)nc(N)c1Br	7.93528	0	0.3217	-0.3217	TN	0.0466	YES
+	836	C=CC1CN2CCC1CC2C(O)c1ccnc2ccc(OC)cc12	6.31547	1	0.29	0.71	FN	0.0388	YES
#	511	CC1(C)CCC2(C(=O)O)CCC3(C)C(=CCC4C5(C)CCC(O)C(C)(C)C5CCC43C)C2C1	1.37643	0	0.1931	-0.1931	TN	0.0989	YES
+	858	Cc1ccc(-c2cc(C(F)(F)F)nn2-c2ccc(S(N)(=O)=O)cc2)cc1	10.4075	1	0.3702	0.6298	FN	0.0633	YES
#	3510	Fc1ccc(-c2csc3ncnc(NCc4ccc5c(c4)OCO5)c23)cc1	12.4397	0	0.41	-0.41	TN	0.1067	YES
-	966	CCCCC(CC)CN1CN(CC(CC)CCCC)CC(C)(N)C1	17.1869	1	0.5031	0.4969	TP	0.0305	YES
+	3221	CN1CC=CCCOc2cccc(c2)-c2ccnc(n2)Nc2cccc(c2)C1	12.4754	0	0.4107	-0.4107	TN	1.0558	No
*	994	N#Cc1ccc2c(c1)N(CCCN1CCC(O)CC1)c1ccccc1S2	28.2868	1	0.7207	0.2793	TP	0.0544	YES
+	1193	CCOC(=O)Cc1ccc(-c2ccccc2)cc1	14.1626	0	0.4438	-0.4438	TN	0.0261	YES
-	1037	C=C1CCC2C(C)(CO)C(O)CCC2(C)C1CC=C1C(=O)OCC1O	23.5939	1	0.6287	0.3713	TP	0.0423	YES
-	2421	NC(=O)C1(N2CCCCC2)CCN(CCCN2c3ccccc3CCc3ccc(Cl)cc32)CC1	25.4329	0	0.6648	-0.6648	FP	0.0674	YES
+	1052	O=C(NC(=O)c1c(F)cccc1F)Nc1cc(Cl)c(OC(F)(F)C(F)C(F)(F)F)cc1Cl	18.1608	1	0.5222	0.4778	TP	4.0622	No
+	1232	Cc1cc(O)cc2c1OC(C)(CCCC(C)CCCC(C)CCCC(C)C)CC2	15.6185	0	0.4724	-0.4724	TN	0.0292	YES
#	1075	Clc1ccc2c(c1)CCc1cccnc1C2=C1CCNCC1	27.4278	1	0.7039	0.2961	TP	0.04	YES
*	969	NC(=O)NC1NC(=O)NC1=O	-4.80887	0	0.0719	-0.0719	TN	0.024	YES
#	1080	O=C1Nc2ccc(Cl)cc2C(C#CC2CC2)(C(F)(F)F)O1	25.7687	1	0.6714	0.3286	TP	0.0466	YES
*	1265	NC(=O)c1cc[n+](CC2=C(C(=O)O)N3C(=O)C(NC(=O)C(c4ccccc4)S(=O)(=O)O)C3SC2)cc1	13.8753	0	0.4382	-0.4382	TN	0.0797	YES
+	1133	Cc1ccc(NC(=O)c2ccc(CN3CCN(C)CC3)cc2)cc1Nc1nccc(-c2cccnc2)n1	26.6004	1	0.6877	0.3123	TP	0.0636	YES
*	462	O=C(O)c1cc(-c2ccc(F)cc2F)ccc1O	5.41455	0	0.2723	-0.2723	TN	0.0283	YES
-	1144	CC(C)=CCOc1ccc(C=CC(=O)c2ccc(OCC=C(C)C)cc2OCC(=O)O)cc1	16.8211	1	0.4959	0.5041	FN	0.0471	YES
*	2863	Cc1ccc(NC(=O)C2(c3ccc4c(c3)OC(F)(F)O4)CC2)nc1-c1cccc(C(=O)O)c1	1.83659	0	0.2022	-0.2022	TN	0.0768	YES
*	1158	O=C1CCc2ccc(OCCCCN3CCN(c4cccc(Cl)c4Cl)CC3)cc2N1	32.7429	1	0.8081	0.1919	TP	0.0581	YES
+	2737	CCOC(=O)CCNc1cc(N2CCc3ccccc3CC2)nc(-c2ccccn2)n1	3.80848	0	0.2408	-0.2408	TN	0.0542	YES
+	1163	Cc1ccc(O)c(C(CCN(C(C)C)C(C)C)c2ccccc2)c1	18.255	1	0.5241	0.4759	TP	0.0272	YES
*	3687	CCC(=O)OC1CC(=O)OC(C)CC=CC=CC(OC(C)=O)C(C)CC(CC=O)C(OC2OC(C)C(OC3CC(C)(OC(C)=O)C(OC(=O)CC)C(C)O3)C(N(C)C)C2O)C1OC	0.44185	0	0.1748	-0.1748	TN	0.1012	YES
#	1167	CC1(CN2CCC(n3c(=O)[nH]c4ccccc43)CC2)OCc2ccccc2-n2cccc21	29.4962	1	0.7444	0.2556	TP	0.0949	YES
*	3777	CC12CCCN1CC1=NNC(=O)c3cc(F)cc4[nH]c2c1c34	16.8288	0	0.4961	-0.4961	TN	0.05	YES
*	1169	O=C(C=Cc1ccccc1)NC(NC(=S)Nc1cccc2cccnc12)C(Cl)(Cl)Cl	28.1738	1	0.7185	0.2815	TP	0.0587	YES
-	905	O=C(NC1CN2CCC1CC2)c1ccc(Cl)cc1	9.61741	0	0.3547	-0.3547	TN	0.0318	YES
*	1172	COc1cc2c(Nc3ccc(NC(=O)c4ccccc4)cc3)ncnc2cc1OCCCN1CCOCC1	35.2021	1	0.8563	0.1437	TP	0.0782	YES
+	1003	CC(C)C1CCC(C(=O)NC(Cc2ccccc2)C(=O)O)CC1	7.33347	0	0.3099	-0.3099	TN	0.0293	YES
-	1239	O=[N+]([O-])c1ccc(O)c2ncccc12	6.09497	1	0.2857	0.7143	FN	0.021	YES
+	691	CC(C)NCC(O)COc1ccc(COCCOC(C)C)cc1	10.4036	0	0.3701	-0.3701	TN	0.0262	YES
#	1254	COc1ccc2cc1Oc1ccc(cc1)CC1c3c(cc4c(c3Oc3cc5c(cc3OC)CCN(C)C5C2)OCO4)CCN1C	44.297	1	1.0346	-0.0346	TP	0.1419	YES
#	1268	CC12CCC3C(CC=C4CC(OS(=O)(=O)O)CCC43C)C1CCC2=O	2.83504	0	0.2217	-0.2217	TN	0.0596	YES
-	1260	CCCCC(C=O)NC(=O)C(CC(C)C)NC(=O)C(CC(C)C)NC(C)=O	3.68101	1	0.2383	0.7617	FN	0.0309	YES
#	1672	COC1C(O)CC(OC2C(O)CC(OC3C(O)CC(OC4CCC5(C)C(CCC6C5CC(O)C5(C)C(C7=CC(=O)OC7)CCC65O)C4)OC3C)OC2C)OC1C	5.42768	0	0.2726	-0.2726	TN	0.1407	YES
*	1264	O=S(=O)(NCCNCC=Cc1ccc(Br)cc1)c1cccc2cnccc12	49.7362	1	1.1412	-0.1412	TP	1.057	No
*	1453	COC(=O)C(CCSC)NC(=O)c1ccc(NCC(N)CS)cc1-c1ccccc1	2.51772	0	0.2155	-0.2155	TN	0.0569	YES
*	1272	COCCOC(=O)C1=C(C)NC(C)=C(C(=O)OCC=Cc2ccccc2)C1c1cccc([N+](=O)[O-])c1	22.66	1	0.6104	0.3896	TP	0.0625	YES
#	196	N=c1cc(N2CCCCC2)nc(N)n1O	-1.89625	0	0.129	-0.129	TN	0.0294	YES
-	1277	CC(C)c1ccc2c(c1)c(SC(C)(C)C)c(CC(C)(C)C(=O)O)n2Cc1ccc(Cl)cc1	17.5492	1	0.5102	0.4898	TP	2.056	No
+	2643	O=C(O)C(O)C(O)C(O)C(O)C(O)CO	-14.8801	0	-0.1256	0.1256	TN	0.016	YES
#	1290	CN1CCCCC1CCN1c2ccccc2Sc2ccc(S(C)=O)cc21	36.2717	1	0.8773	0.1227	TP	0.0502	YES
#	1511	N=C(N)c1ccc(C=Cc2ccc(C(=N)N)cc2O)cc1	10.5478	0	0.373	-0.373	TN	0.0496	YES
-	1292	CN1CCC(=C2c3ccccc3CCc3sccc32)CC1	27.8026	1	0.7112	0.2888	TP	0.0566	YES
-	3955	CCCCCCCCCCCCCCCCOCCCOP(=O)(O)COC(CO)Cn1ccc(N)nc1=O	12.5992	0	0.4132	-0.4132	TN	6.0547	No
-	1299	CCCCC(C=O)NC(=O)C(CC(C)C)NC(=O)OCc1ccccc1	4.17217	1	0.248	0.752	FN	0.0325	YES
*	1348	Cc1cc(NS(=O)(=O)c2ccc(N)cc2)nc(C)n1	-9.76405	0	-0.0253	0.0253	TN	0.0374	YES
-	1306	COc1ccc2c(c1)c(C1=C(c3c[nH]c4ccccc34)C(=O)NC1=O)cn2CCCN(C)C	10.8484	1	0.3788	0.6212	FN	1.0782	No
*	2639	CCN1CCN(C(=O)NC(C(=O)NC2C(=O)N3C2SC(C)(C)C3C(=O)O)c2ccccc2)C(=O)C1=O	5.80473	0	0.28	-0.28	TN	0.0658	YES
+	1332	CC(C)(C)CC(C)(C)c1ccc(O)cc1	10.1874	1	0.3659	0.6341	FN	0.0169	YES
+	3796	CCNCCS(=O)(=O)NCC1(c2ccccc2)SC(NC(=O)C(C)(C)C)=NN1C(=O)C(C)(C)C	9.03966	0	0.3434	-0.3434	TN	2.0661	No
+	1349	O[n+]1ccccc1SSc1cccc[n+]1O	23.4373	1	0.6257	0.3743	TP	1.0242	No
-	2994	CN1CCN(c2ncc(-c3cc(Cl)cc(Cl)c3Cl)c(N)n2)CC1	20.2349	0	0.5629	-0.5629	FP	3.0436	No
*	1360	COc1ccc(CN2CCN(C(c3ccc(F)cc3)c3ccc(F)cc3)CC2)c(OC)c1OC	27.3076	1	0.7015	0.2985	TP	0.0504	YES
+	2334	CC(C)NCCCC1(C(N)=O)c2ccccc2-c2ccccc21	12.2884	0	0.4071	-0.4071	TN	0.0417	YES
-	1372	CNCCC(Oc1cccc2ccccc12)c1cccs1	17.5582	1	0.5104	0.4896	TP	0.0349	YES
*	138	CCOC(=O)c1ncn2c1CN(C)C(=O)c1cc(F)ccc1-2	-1.26834	0	0.1413	-0.1413	TN	1.0373	No
+	1381	Cc1cccc(C)c1OCC(=O)NC(Cc1ccccc1)C(O)CC(Cc1ccccc1)NC(=O)C(C(C)C)N1CCCNC1=O	22.0112	1	0.5977	0.4023	TP	0.0728	YES
-	2580	CCCCc1ccc(NS(=O)(=O)c2ccc(C)c(C(=O)N3CCN(c4cccc(C)c4C)CC3)c2)cc1	9.89905	0	0.3602	-0.3602	TN	0.0775	YES
+	1421	CCOC(=O)C(CCc1ccccc1)NC1CCc2ccccc2N(CC(=O)O)C1=O	12.6286	1	0.4137	0.5863	FN	0.0461	YES
#	2631	COC1CC(OC2C(C)=CCC3CC(CC4(CCC(C)C(C5CCCCC5)O4)O3)OC(=O)C3C=C(C)C(=NO)C4OCC(=CC=CC2C)C34O)OC(C)C1O	19.6319	0	0.551	-0.551	FP	0.1501	YES
-	1425	NC(=O)c1ccc2nc(-c3ccc(Oc4ccc(Cl)cc4)cc3)[nH]c2c1	26.7928	1	0.6914	0.3086	TP	0.0624	YES
*	3892	Nc1ncc(C(=O)NC2CN(C(=O)C3CC3)C2)c2ccc(-c3cccc(F)c3)nc12	11.6255	0	0.3941	-0.3941	TN	0.0564	YES
#	1442	COc1cccc2c1CCCC2CCCN1CCN(C2CCCCC2)CC1	24.9792	1	0.6559	0.3441	TP	0.0382	YES
-	3651	Cc1ncc(OCC2(c3cccc(F)c3)CC2C(=O)Nc2ccc(F)cn2)c(C)n1	28.5075	0	0.7251	-0.7251	FP	0.0513	YES
-	1445	Fc1ccc(Cl)cc1-c1nc(Nc2ccncc2)c2nccnc2n1	22.6426	1	0.6101	0.3899	TP	0.0428	YES
+	1482	C#CC1(OC(C)=O)CCC2C3CCC4=CC(OC(C)=O)CCC4C3CCC21C	17.6938	0	0.5131	-0.5131	FP	0.0504	YES
#	1446	Cc1[nH]c(C=C2C(=O)Nc3ccc(S(=O)(=O)N(C)c4cccc(Cl)c4)cc32)c(C)c1C(=O)N1CCN(C)CC1	40.4749	1	0.9597	0.0403	TP	0.0971	YES
#	1031	O=C1OCCN1N=Cc1ccc([N+](=O)[O-])o1	15.6521	0	0.473	-0.473	TN	0.0461	YES
*	1452	CCOC(=O)C1C(=COCCN)NC(C)=C(C(=O)OC)C1c1ccccc1Cl	18.3539	1	0.526	0.474	TP	0.0419	YES
-	539	O=C(O)c1ccccc1S	10.3938	0	0.3699	-0.3699	TN	0.0135	YES
-	1502	O=[N+]([O-])c1cc(I)c(O)c(I)c1	14.6509	1	0.4534	0.5466	FN	0.0167	YES
+	3458	CS(=O)(=O)c1ccc(-c2nnc(C=Cc3nnc(-c4ccc(C#N)cc4)o3)n2-c2ccccc2Cl)nc1	-23.8802	0	-0.302	0.302	TN	5.1241	No
+	1531	CCOC(=O)C1OC1C(=O)NC(CC(C)C)C(=O)NCCC(C)C	11.5425	1	0.3925	0.6075	FN	0.0306	YES
*	2497	NC(=O)c1ccc(I)c([N+](=O)[O-])c1	8.27253	0	0.3283	-0.3283	TN	0.0186	YES
#	1558	C#CC1(O)CCC2C3CCC4=CCCCC4C3C(=C)CC21CC	19.8783	1	0.5559	0.4441	TP	0.0488	YES
+	595	CN(C)CCOc1ccccc1Cc1ccccc1	11.1054	0	0.3839	-0.3839	TN	0.0248	YES
+	1570	C=C1C(=CC=C2CCCC3(C)C2CCC3C(C)C=CC(O)C2CC2)CC(O)CC1O	22.2858	1	0.6031	0.3969	TP	0.0577	YES
-	117	CN(C)CCC=C1c2ccccc2COc2ccccc21	23.3495	0	0.6239	-0.6239	FP	0.0431	YES
+	1585	CNC(=O)c1cc(Oc2ccc(NC(=O)Nc3ccc(Cl)c(C(F)(F)F)c3)cc2)ccn1	27.3182	1	0.7017	0.2983	TP	0.0592	YES
#	1407	CC(C)(C#N)c1cc(Cn2cncn2)cc(C(C)(C)C#N)c1	10.6196	0	0.3744	-0.3744	TN	0.0398	YES
+	1586	COc1cccc(CCc2ccccc2OCC(CN(C)C)OC(=O)CCC(=O)O)c1	18.7497	1	0.5338	0.4662	TP	0.0408	YES
#	514	CC(C)(O)C1C2OC(=O)C1C1(O)CC3OC34C(=O)OC2C14C	1.57738	0	0.1971	-0.1971	TN	0.0692	YES
*	1589	COC(=O)C1=C(C)NC(C)=C(C(=O)OC(C)(C)CN(C)CCC(c2ccccc2)c2ccccc2)C1c1cccc([N+](=O)[O-])c1	29.9503	1	0.7533	0.2467	TP	0.0674	YES
*	2254	Clc1cc(Cl)cc(CNc2ncncc2-c2ccc3c(c2)OCO3)c1	-7.11616	0	0.0267	-0.0267	TN	0.0555	YES
*	1590	COC(=O)C1=C(C)NC(C)=C(C(=O)OCCN2CCN(C(c3ccccc3)c3ccccc3)CC2)C1c1cccc([N+](=O)[O-])c1	30.3651	1	0.7615	0.2385	TP	0.0753	YES
+	1751	Cc1onc(-c2ccccc2Cl)c1C(=O)NC1C(=O)N2C1SC(C)(C)C2C(=O)O	-3.6999	0	0.0936	-0.0936	TN	1.0698	No
*	1598	CS(=O)(=O)CCNCc1ccc(-c2ccc3ncnc(Nc4ccc(OCc5cccc(F)c5)c(Cl)c4)c3c2)o1	35.5278	1	0.8627	0.1373	TP	0.1335	YES
-	2908	CCS(=O)(=O)c1cccc(-c2cc(C(=O)NC3CCN(C)CC3)c(C)c3[nH]c4ncc(C)cc4c23)c1	5.26932	0	0.2695	-0.2695	TN	0.0767	YES
+	1638	CCN(CC)CCCN(c1ccccc1)C1Cc2ccccc2C1	21.0523	1	0.5789	0.4211	TP	0.0386	YES
#	1820	CC(=O)Nc1c(I)c(C(=O)NC2C(O)OC(CO)C(O)C2O)c(I)c(N(C)C(C)=O)c1I	5.58779	0	0.2757	-0.2757	TN	0.0577	YES
#	1642	CC(C)c1onc(-c2c(Cl)cccc2Cl)c1COc1ccc(C=Cc2cccc(C(=O)O)c2)c(Cl)c1	28.4744	1	0.7244	0.2756	TP	0.0749	YES
#	1934	CC1=C(C)C(=O)C(C(CCCCCC(=O)O)c2ccccc2)=C(C)C1=O	9.03179	0	0.3432	-0.3432	TN	0.0307	YES
-	1646	COc1cc(C(C)C)c2c(c1)S(=O)(=O)N(COc1cc(=O)n3cccc(OCCN4CCCCC4)c3n1)C2=O	21.0546	1	0.5789	0.4211	TP	0.0883	YES
#	982	COc1ccc(C2C(=O)c3ccccc3C2=O)cc1	12.6717	0	0.4146	-0.4146	TN	0.038	YES
+	1647	O=C(c1ccc(Nc2nccc(-c3cc4ccccc4s3)n2)cc1)N1CCC(N2CCCC2)CC1	35.1877	1	0.856	0.144	TP	0.0948	YES
*	1596	N=C(N)NCCCCC1NC(=O)CCSSCC(C(N)=O)NC(=O)C2CCCN2C(=O)C(Cc2c[nH]c3ccccc23)NC(=O)C(CC(=O)O)NC(=O)CNC1=O	-8.46046	0	0.0003	-0.0003	TN	3.1005	No
#	1682	N#CC(c1ccc(Cl)cc1)c1c(Cl)cc(-n2ncc(=O)[nH]c2=O)cc1Cl	37.0456	1	0.8924	0.1076	TP	0.0523	YES
+	248	C#CCN(C)Cc1ccccc1	5.20198	0	0.2681	-0.2681	TN	0.0144	YES
-	1691	CN1CCCC(n2nc(Cc3ccc(Cl)cc3)c3ccccc3c2=O)CC1	32.4381	1	0.8021	0.1979	TP	0.0517	YES
#	2126	O=C(O)c1ccc(O)c2ncccc12	1.92262	0	0.2039	-0.2039	TN	0.0197	YES
+	1699	Clc1ccc(C(OCCN2CCCCC2)c2ccccc2)cc1	19.6609	1	0.5516	0.4484	TP	0.0314	YES
+	91	Clc1ccc(C(c2ccc(Cl)cc2)[n+]2ccn(CC(OCc3ccc(Cl)cc3Cl)c3ccc(Cl)cc3Cl)c2)cc1	37.2013	0	0.8955	-0.8955	FP	6.0597	No
+	1704	CCN(CC)CCOC(=O)C(Cc1cccc2ccccc12)CC1CCCO1	10.5594	1	0.3732	0.6268	FN	0.036	YES
*	1380	Cc1c(C(=O)NN2CCCCC2)nn(-c2ccc(Cl)cc2Cl)c1-c1ccc(Cl)cc1	16.3518	0	0.4867	-0.4867	TN	0.0685	YES
*	1726	CN(Cc1cc(Br)cc(Br)c1N)C1CCCCC1	52.5011	1	1.1954	-0.1954	TP	0.0353	YES
*	2317	CC1CCC(C(C)C)C(O)C1	6.27545	0	0.2892	-0.2892	TN	0.0088	YES
*	1738	CC(CN(C)C)CN1c2ccccc2Sc2ccccc21	30.2977	1	0.7601	0.2399	TP	0.0413	YES
#	1362	COc1cc(C(=O)NS(=O)(=O)c2ccccc2C)ccc1Cc1cn(C)c2ccc(NC(=O)OC3CCCC3)cc12	-1.2162	0	0.1423	-0.1423	TN	0.0691	YES
#	1754	CCN(CC)C(C)CN1c2ccccc2Sc2ccccc21	31.2139	1	0.7781	0.2219	TP	0.0415	YES
-	579	CC[N+](C)(CC)CCOC(=O)C(O)(c1ccccc1)C1CCCCC1	16.5572	0	0.4908	-0.4908	TN	0.0368	YES
#	1798	COc1ccc2c(c1)N(CC(C)CN(C)C)c1ccccc1S2	24.9257	1	0.6548	0.3452	TP	0.0422	YES
+	2458	CCSc1ccc2c(c1)N(CCCN1CCN(C)CC1)c1ccccc1S2	26.0925	0	0.6777	-0.6777	FP	0.0614	YES
-	1800	CN1CCN(C(c2ccccc2)c2ccc(Cl)cc2)CC1	25.1654	1	0.6595	0.3405	TP	0.0309	YES
#	3791	Cc1ccc(-c2ccc(C)cn2)nc1	-1.84292	0	0.13	-0.13	TN	0.0208	YES
#	1830	CC1CC2C3CCC4=CC(=O)C=CC4(C)C3(Cl)C(O)CC2(C)C1(OC(=O)c1ccco1)C(=O)CCl	27.5159	1	0.7056	0.2944	TP	0.0724	YES
-	931	CC(C)NC(C)Cc1ccc(I)cc1	12.2401	0	0.4061	-0.4061	TN	0.0158	YES
-	1846	CN1CCN(CCCN2c3ccccc3Sc3ccc(S(=O)(=O)N(C)C)cc32)CC1	26.0426	1	0.6767	0.3233	TP	0.0624	YES
*	1386	NCC1CCC(C(=O)Oc2ccc(CCC(=O)O)cc2)CC1	-2.48807	0	0.1174	-0.1174	TN	0.0274	YES
*	1854	C#CC1(O)CCC2C3CCC4=Cc5oncc5CC4(C)C3CCC21C	26.9035	1	0.6936	0.3064	TP	0.0768	YES
#	209	CCOC(=O)C1=C(C)NC(C)=C(C(=O)OC)C1c1cccc([N+](=O)[O-])c1	10.4693	0	0.3714	-0.3714	TN	0.0408	YES
-	1857	C#CC1(O)CCC2C3CCC4=CCCCC4C3CCC21C	19.3747	1	0.546	0.454	TP	0.0446	YES
+	1948	CCOC(=O)C(CCc1ccccc1)NC(C)C(=O)N1C(=O)N(C)CC1C(=O)O	7.87462	0	0.3205	-0.3205	TN	0.0433	YES
-	1864	CCC1CN2CCC1CC2C(O)c1ccnc2ccc(OC)cc12	6.61899	1	0.2959	0.7041	FN	0.0361	YES
#	3606	COCCOc1cnc2ccn(C(C)c3nnc4c(F)cc(-c5cnn(C)c5)cn34)c(=O)c2c1	2.37479	0	0.2127	-0.2127	TN	0.1307	YES
-	1898	CN(C)CCC=C1c2ccccc2C(C)(C)c2ccccc21	29.3294	1	0.7412	0.2588	TP	0.042	YES
-	3815	Cc1cc(-c2cnn3c(NCC4CC(C)(O)C4)cc(Oc4cccnc4)nc23)ccc1C(=O)NC1CC1	0.74022	0	0.1807	-0.1807	TN	0.1075	YES
-	1904	Cc1cc(O)c2c(c1)OC1(C)CCC3C(C)(C)CCCC34COC2C14	21.5959	1	0.5896	0.4104	TP	0.0573	YES
*	3495	CCC(C)C1NC(=O)C(Cc2ccc(O)cc2)NC(=O)C(N)CSSCC(C(=O)N2CCCC2C(=O)NC(CC(C)C)C(=O)NCC(N)=O)NC(=O)C(CC(N)=O)NC(=O)C(CCC(N)=O)NC1=O	-20.7266	0	-0.2402	0.2402	TN	2.1104	No
+	1907	CCCOC(C(=O)OC1CCN(C)CC1)(c1ccccc1)c1ccccc1	24.6002	1	0.6484	0.3516	TP	0.0522	YES
*	3319	COC1C=COC2(C)Oc3c(C)c(O)c4c(O)c(c(C=NN5CCN(C6CCCC6)CC5)c(O)c4c3C2=O)NC(=O)C(C)=CC=CC(C)C(O)C(C)C(O)C(C)C(OC(C)=O)C1C	14.6044	0	0.4525	-0.4525	TN	0.1511	YES
*	1930	CC(CN(C)C)CN1c2ccccc2Sc2ccc(C(F)(F)F)cc21	30.6728	1	0.7675	0.2325	TP	0.0528	YES
-	3467	COc1cc(C)[nH]c(=O)c1CNC(=O)c1c(C)n(C(C)C2CCOCC2)c2ccccc12	20.1677	0	0.5616	-0.5616	FP	0.0577	YES
+	1983	CC(C(O)c1ccccc1)N(C)CCOC(c1ccccc1)c1ccccc1	28.8479	1	0.7317	0.2683	TP	0.0471	YES
*	3647	Cc1c(NC(=O)c2cc(C(N)=O)nc3cc(F)ccc23)c(C(F)(F)F)nn1Cc1ccc(C#N)cc1	1.45556	0	0.1947	-0.1947	TN	0.0734	YES
*	2007	Cc1c(-c2ccc(O)cc2)n(Cc2ccc(OCCN3CCCCCC3)cc2)c2ccc(O)cc12	19.3536	1	0.5456	0.4544	TP	0.0577	YES
#	3478	CCc1c(C(=O)NNC(=O)C(O)c2cc(F)cc(F)c2)ccc(O)c1C	15.1385	0	0.463	-0.463	TN	0.0317	YES
*	2022	CN(C)CCOC1=Cc2ccccc2Sc2ccc(Cl)cc21	30.5378	1	0.7649	0.2351	TP	0.0476	YES
+	2204	Nc1ncnc2c1ncn2C1OC(COP(=O)(O)OP(=O)(O)OP(=O)(O)O)C(O)C1O	-32.5998	0	-0.4729	0.4729	TN	19.0486	No
-	2024	Cn1nnnc1Sc1ncnc2scc(-c3cccc(S(C)(=O)=O)c3)c12	29.0853	1	0.7364	0.2636	TP	0.0768	YES
+	3403	CC(C)CN(CC(O)C(Cc1ccccc1)NC(=O)OC1COC2OCCC12)S(=O)(=O)c1ccc(N)cc1	6.90531	0	0.3015	-0.3015	TN	1.0705	No
+	2041	CC1CC2C3CCC4=CC(=O)C=CC4(C)C3C(=O)CC2(C)C1(O)C(=O)CO	10.7976	1	0.3779	0.6221	FN	0.0553	YES
+	3668	CC1(c2ncncc2F)NC(=O)c2cc(-c3cn[nH]c3)ccc21	0.36691	0	0.1734	-0.1734	TN	1.0452	No
+	2074	O=C(CCC1CCN(Cc2ccccc2)CC1)c1ccc2c(c1)NCCCC2	22.5561	1	0.6084	0.3916	TP	0.0517	YES
*	2098	CCC=C(C(=O)NC1C(=O)N2C(C(=O)OCOC(=O)C(C)(C)C)=C(COC(N)=O)CSC12)c1csc(N)n1	-4.8555	0	0.071	-0.071	TN	0.0789	YES
-	2086	CCCN(CCC)C(=O)C(CCC(=O)OCCCN1CCN(CCOC(=O)Cc2c(C)n(C(=O)c3ccc(Cl)cc3)c3ccc(OC)cc23)CC1)NC(=O)c1ccccc1	34.3284	1	0.8392	0.1608	TP	0.0966	YES
-	3677	COc1cc2c3c(n(CCCN4CCOCC4)c(=O)c2cc1OC)-c1cc2c(cc1C3=O)OCO2	5.641	0	0.2768	-0.2768	TN	0.0823	YES
-	2124	COc1cc(O)c2c(c1)C1OC1CC(O)C(O)C(=O)C=CCC(C)OC2=O	13.1107	1	0.4232	0.5768	FN	0.0504	YES
+	2956	COCCOc1ccc2c(c1)ncn2-c1ccc2cccc(N3CCC(N)CC3)c2n1	8.53888	0	0.3336	-0.3336	TN	1.0579	No
+	2127	CN(C)CCCNC(=O)c1ccc(-c2cc(O)c3ncccc3c2)cc1	19.2942	1	0.5444	0.4556	TP	0.041	YES
*	55	O=c1nc[nH]c2n[nH]cc12	2.19965	0	0.2093	-0.2093	TN	0.015	YES
+	2129	COC(=O)C1=C(C)NC(COC(N)=O)=C(C(=O)OC(C)C)C1c1cccc(Cl)c1Cl	14.4588	1	0.4496	0.5504	FN	0.0463	YES
#	2733	CC1=NN(c2ccc(C(=O)O)cc2)C(=O)/C1=C/c1ccc(-c2cc(C)c(C)cc2[N+](=O)[O-])o1	1.14502	0	0.1886	-0.1886	TN	0.0567	YES
#	2134	O=C(CCCN1CCN(c2ccc(F)cc2)CC1)NC1c2ccccc2CSc2ccccc21	37.2664	1	0.8968	0.1032	TP	0.0691	YES
-	1126	CCC(=O)OCC(=O)C1(OC(=O)CC)C(C)CC2C3CCC4=CC(=O)C=CC4(C)C3(F)C(O)CC21C	4.03901	0	0.2453	-0.2453	TN	1.0652	No
+	2145	CCN1CCN(c2cc(-c3ccc(F)cc3)c3c(n2)CCCCCC3)CC1	23.9215	1	0.6351	0.3649	TP	0.0479	YES
*	2970	CCOC(=O)C(O)=CBr	2.16367	0	0.2086	-0.2086	TN	0.0102	YES
#	2181	COC1C(OC(C)=O)CC(=O)OC(C)CC=CC=CC(OC2CCC(N(C)C)C(C)O2)C(C)CC(CC=O)C1OC1OC(C)C(OC2CC(C)(O)C(O)C(C)O2)C(N(C)C)C1O	23.6213	1	0.6293	0.3707	TP	0.1061	YES
*	1030	Oc1ccc(Cl)c2cccnc12	10.2472	0	0.3671	-0.3671	TN	0.0147	YES
-	2190	CCc1ccc(C=C2SC(=S)NC2=O)cc1	17.2143	1	0.5036	0.4964	TP	0.0405	YES
-	3236	CC(C=CC(C)C(C)(C)O)C1CCC2C(=CC=C3CC(O)CC(O)C3)CCCC21C	7.70585	0	0.3172	-0.3172	TN	0.0438	YES
-	2210	COc1cc(F)c(F)c(Nc2ccc(I)cc2F)c1NS(=O)(=O)C1(CC(O)CO)CC1	16.1618	1	0.483	0.517	FN	0.0469	YES
+	3577	CC1=CCC(=C(C)C)C(=O)CC(C)=CCC1	4.75125	0	0.2593	-0.2593	TN	0.0191	YES
-	2223	COc1cc(C(C)=O)ccc1OCCCN1CCC(c2noc3cc(F)ccc23)CC1	31.1844	1	0.7775	0.2225	TP	2.0426	No
#	2987	CCC(C)SSc1ncc[nH]1	8.00484	0	0.3231	-0.3231	TN	0.016	YES
#	2224	Cc1ccc(Nc2nccc(N(C)c3ccc4c(C)n(C)nc4c3)n2)cc1S(N)(=O)=O	26.6927	1	0.6895	0.3105	TP	0.0903	YES
*	2301	CC(C)=CCN1CCC2(C)c3cc(O)ccc3CC1C2C	13.92	0	0.4391	-0.4391	TN	0.0317	YES
*	2236	O=C(Nc1ccc(F)c(C(F)(F)F)c1)Nc1nnc(-c2ccncc2)s1	30.5532	1	0.7652	0.2348	TP	0.0732	YES
+	2232	CN1C(=O)CC(C)(c2ccccc2)C1=O	10.0856	0	0.3639	-0.3639	TN	0.0256	YES
#	2238	COc1cc(C)c(Sc2cnc(NC(=O)c3ccc(CNC(C)C(C)(C)C)cc3)s2)cc1C(=O)N1CCN(C(C)=O)CC1	33.4038	1	0.821	0.179	TP	0.0727	YES
-	1173	COC1=CC23CCCN2CCc2cc4c(cc2C3C1O)OCO4	6.18162	0	0.2874	-0.2874	TN	0.0593	YES
#	2242	Cn1cc(C2=C(c3cn(C4CCN(Cc5ccccn5)CC4)c4ccccc34)C(=O)NC2=O)c2ccccc21	23.5676	1	0.6282	0.3718	TP	0.154	YES
*	624	CC12CCC(=O)C=C1CCC1C2C(O)CC2(C)C1CCC2(O)C(=O)COC(=O)CCC(=O)O	2.40336	0	0.2133	-0.2133	TN	0.048	YES
#	2247	Cc1ccc(NC(=O)c2ccc(CN3CCN(C)CC3)cc2)cc1Nc1nc(-c2cccnc2)cs1	31.3411	1	0.7806	0.2194	TP	0.0698	YES
#	2924	COc1ccc2c(Oc3ccc(NC(=O)c4c(C)n(CC(C)(C)O)n(-c5ccccc5)c4=O)nc3)ccnc2c1	17.528	0	0.5098	-0.5098	FP	0.1244	YES
*	2251	OCCC#Cc1nc(-c2ccc(F)cc2)c(-c2ccncc2)n1CCCc1ccccc1	23.7917	1	0.6326	0.3674	TP	0.0485	YES
+	2109	CCN(CC)CCOC(=O)c1ccc(N)cc1Cl	5.25472	0	0.2692	-0.2692	TN	0.0253	YES
*	2270	CCN(CC)CCOc1ccc(Nc2ncc3cc(-c4c(Cl)cccc4Cl)c(=O)n(C)c3n2)cc1	25.6872	1	0.6698	0.3302	TP	1.0746	No
#	1330	O=C(O)C(O)C(O)C(O)C(O)CO	-12.8519	0	-0.0858	0.0858	TN	0.0137	YES
#	2273	CC(C)(C)c1cc(NC(=O)Nc2ccc(-c3cn4c(n3)sc3cc(OCCN5CCOCC5)ccc34)cc2)no1	43.2004	1	1.0131	-0.0131	TP	0.1289	YES
*	2208	O=S(=O)(O)c1ccc2c(N=Nc3ccc(S(=O)(=O)O)c4ccccc34)c(O)c(S(=O)(=O)O)cc2c1	20.7778	0	0.5735	-0.5735	FP	1.0923	No
#	2279	CC(=O)OCC(=O)C1(O)C(C)CC2C3C=C(C)C4=Cc5c(cnn5-c5ccccc5)CC4(C)C3C(O)CC21C	39.375	1	0.9381	0.0619	TP	0.1462	YES
+	3889	O=C(Nc1cnccc1Cl)N1CCN(Cc2ccc3c(c2)OC(F)(F)O3)CC1	-4.1936	0	0.0839	-0.0839	TN	1.0671	No
+	2289	CCOC(=O)c1c(CSc2ccccc2)n(C)c2cc(Br)c(O)c(CN(C)C)c12	28.2961	1	0.7209	0.2791	TP	0.0599	YES
+	1010	CN(C)CCc1c[nH]c2ccc(CS(=O)(=O)N3CCCC3)cc12	9.3167	0	0.3488	-0.3488	TN	0.0358	YES
#	2298	COc1ccc2cc1Oc1ccc(cc1)CC1c3cc(c(OC)cc3CCN1C)Oc1c(O)c(OC)cc3c1C(C2)N(C)CC3	36.3287	1	0.8784	0.1216	TP	0.0758	YES
#	2748	CC(=O)NC(CC(=O)O)C(=O)NC(CCC(=O)O)C(=O)NC(C(=O)NC(C=O)CC(=O)O)C(C)C	-18.7716	0	-0.2019	0.2019	TN	0.0466	YES
-	2300	CC(=O)ON=C1C(=O)N(Cc2cc(Cl)ccc2Cl)c2ccc(Cl)cc21	20.6854	1	0.5717	0.4283	TP	0.0613	YES
#	213	CS(=O)(=O)Nc1ccc([N+](=O)[O-])cc1Oc1ccccc1	7.55553	0	0.3143	-0.3143	TN	0.0378	YES
-	2304	COc1c(C)cnc(Cn2cnc3c(Cl)nc(N)nc32)c1C	16.5549	1	0.4907	0.5093	FN	1.0463	No
#	3186	Cn1c(=O)cc(N2CCCC(N)C2)n(Cc2cc(F)ccc2C#N)c1=O	-2.0726	0	0.1255	-0.1255	TN	0.0612	YES
*	2305	CCNC(=O)c1noc(-c2cc(C(C)C)c(O)cc2O)c1-c1ccc(CN2CCOCC2)cc1	42.2832	1	0.9951	0.0049	TP	3.0638	No
+	1703	COc1ccc(CN(CCN(C)C)c2ncccn2)cc1	8.04787	0	0.3239	-0.3239	TN	0.0288	YES
*	2307	O=C(NC(c1ccccc1)C1CCCCN1)c1cccc(C(F)(F)F)c1Cl	25.4801	1	0.6657	0.3343	TP	0.0528	YES
#	1175	O=C1C=CCC2C3CCCN4CCCC(CN12)C34	12.2836	0	0.407	-0.407	TN	0.045	YES
*	2321	Cc1ccc(C(=O)Nc2cccc(C(F)(F)F)c2)cc1Nc1nc(-c2cccnc2)nc2c1cnn2C	19.3391	1	0.5453	0.4547	TP	1.075	No
*	1629	NCC(O)c1cccc(O)c1	4.50582	0	0.2545	-0.2545	TN	0.014	YES
*	2326	O=C(Nc1ccc(S(=O)(=O)N2CCOCC2)cc1)c1cc(Cl)ccc1NS(=O)(=O)c1ccc(Cl)s1	33.2155	1	0.8174	0.1826	TP	0.0757	YES
+	2806	O=C(NCc1ccncc1)C12CC3CC(C1)CC(c1ccc(Cl)cc1)(C3)C2	16.1525	0	0.4828	-0.4828	TN	0.0563	YES
+	2338	CN(C)CCOC(c1ccccc1)c1ccc(Br)cc1	41.5137	1	0.98	0.02	TP	0.0379	YES
-	2814	Nc1ncnc2c1c(-c1cccc(OCc3ccccc3)c1)cn2C1CC(CN2CCC2)C1	11.5686	0	0.393	-0.393	TN	1.0652	No
#	2361	CN(C)CCCOC1(Cc2ccccc2)CCCCCC1	18.8834	1	0.5364	0.4636	TP	0.0311	YES
-	1058	CC(C=CC=C(C)C=CC1=C(C)CCCC1(C)C)=CC=CC=C(C)C=CC=C(C)C=CC1=C(C)CCCC1(C)C	21.4035	0	0.5858	-0.5858	FP	0.066	YES
#	2392	CN1CCN(c2cc(C(=O)Nc3ccc4c(c3)-c3c(c(C(N)=O)nn3-c3ccc(F)cc3)CC4)c(Cl)cn2)CC1	24.5838	1	0.6481	0.3519	TP	0.0974	YES
-	3659	CN1CCN(c2ccc(Nc3ncc4cc(C#N)c(=O)n(C5CCCC5)c4n3)cc2)CC1	3.14701	0	0.2279	-0.2279	TN	0.1092	YES
#	2394	Cc1c(CCOc2ccc(C(=O)O)cc2)c2cc(Cl)ccc2n1C(c1ccccc1)c1ccccc1	27.6433	1	0.7081	0.2919	TP	0.0566	YES
-	3431	CC(C)C(NC(=O)c1ccc2ccccc2n1)C(=O)NC(CC(=O)O)C(=O)COc1c(F)cccc1F	15.9251	0	0.4784	-0.4784	TN	2.0489	No
-	2401	Cc1ccc(F)c(NC(=O)Nc2ccc(-c3cccc4n[nH]c(N)c34)cc2)c1	26.6362	1	0.6884	0.3116	TP	0.0634	YES
#	326	CCCN(CCC)S(=O)(=O)c1ccc(C(=O)O)cc1	3.5971	0	0.2367	-0.2367	TN	0.0265	YES
*	2403	Cn1c(Nc2ccc(C(F)(F)F)cc2)nc2cc(Oc3ccnc(-c4ncc(C(F)(F)F)[nH]4)c3)ccc21	17.2886	1	0.5051	0.4949	TP	0.0915	YES
+	3201	C=CC1CC1(NC(=O)C1CC2CN1C(=O)C(C(C)(C)C)NC(=O)OC1CC1CCCCCc1nc3ccc(OC)cc3nc1O2)C(=O)NS(=O)(=O)C1CC1	9.596	0	0.3543	-0.3543	TN	1.089	No
-	2405	O=C(O)c1ccc(-c2c[nH]c3ncc(-c4ccccc4)cc23)cc1C1CCCC1	22.901	1	0.6151	0.3849	TP	0.0642	YES
*	1182	Nc1nc(N)nc(-c2cc(Cl)ccc2Cl)n1	10.72	0	0.3763	-0.3763	TN	1.0427	No
#	2415	CC1CCCCN1CCCOC(=O)c1ccc(OC2CCCCC2)cc1	24.3482	1	0.6435	0.3565	TP	0.0352	YES
+	2796	CN(C)CC(c1ccc(O)cc1)C1(O)CCCCC1	13.44	0	0.4297	-0.4297	TN	0.0315	YES
*	2436	CN(C)C(CCOc1cccc2ccccc12)c1ccccc1	19.6533	1	0.5515	0.4485	TP	0.0303	YES
*	2521	CC(C)(C)COc1ccc(-n2cc(C(=O)O)cn2)cc1C#N	11.2431	0	0.3866	-0.3866	TN	1.0322	No
+	2441	Cc1cccc(Nc2nc(NC3CCCCC3N)ncc2C(N)=O)c1	21.5015	1	0.5877	0.4123	TP	0.0457	YES
+	3693	CC(C)CC1NC(=O)C(C(C)C)NC(=O)C2CCCN2C(=O)C(CC(=O)O)NC(=O)C(Cc2c[nH]c3ccccc23)NC1=O	16.6138	0	0.4919	-0.4919	TN	1.0697	No
+	2475	CCC(CN)=C(c1ccccc1)c1ccccc1	22.2313	1	0.602	0.398	TP	0.0319	YES
#	587	CCC(NC(C)C)C(O)c1ccc(O)c2[nH]c(=O)ccc12	5.68126	0	0.2775	-0.2775	TN	0.0287	YES
-	2483	Cc1nn(Cc2ccccc2Cl)c(C)c1CN(C)CC(O)COc1ccc(Cl)cc1	14.8396	1	0.4571	0.5429	FN	0.0637	YES
*	3774	COc1cnc(-n2cnc(C)n2)c2c1c(C(=O)C(=O)N1CCN(C(=O)c3ccccc3)CC1)cn2COP(=O)(O)O	5.76161	0	0.2791	-0.2791	TN	7.0833	No
+	2485	COc1cc2nc(-c3ccc(N4CCN(C)CC4)cc3)nc(NCCN3CCOCC3)c2cc1OC	32.877	1	0.8107	0.1893	TP	0.0758	YES
-	2025	Cc1cccc(C)c1NC(=O)c1cc(S(N)(=O)=O)c(Cl)cc1O	19.0441	0	0.5395	-0.5395	FP	0.0386	YES
+	2495	Cc1cccc(C=NNc2cc(N3CCOCC3)nc(OCCc3ccccn3)n2)c1	31.2946	1	0.7797	0.2203	TP	1.0571	No
#	1492	O=C(O)Cn1c2ccccc2c(=O)c2ccccc21	11.5022	0	0.3917	-0.3917	TN	0.0431	YES
*	2496	Cc1csc(-c2nnc(Nc3ccc(Oc4ncccc4-c4ccnc(N)n4)cc3)c3ccccc23)c1	20.2013	1	0.5622	0.4378	TP	0.1075	YES
-	1845	NCCCCC(NC(CCc1ccccc1)C(=O)O)C(=O)N1CCCC1C(=O)O	9.71709	0	0.3567	-0.3567	TN	0.0402	YES
+	2508	CCCCCCCc1ccc(CCc2cccc(O)c2C(=O)O)cc1	14.5796	1	0.452	0.548	FN	0.0301	YES
#	509	CON=C(C(=O)NC1C(=O)N2C(C(=O)O)=C(C[N+]3(C)CCCC3)CSC12)c1csc(N)n1	-2.46145	0	0.1179	-0.1179	TN	0.079	YES
#	2515	CCN(CC)CCCCNc1nc2cc(Cl)c(Cl)cc2nc1-c1ccc(-c2cccs2)s1	40.9662	1	0.9693	0.0307	TP	0.0673	YES
*	625	CC(=O)NC(CS)C(=O)O	-2.17969	0	0.1234	-0.1234	TN	0.017	YES
-	2525	O=C(O)C(=O)c1cn(Cc2ccccc2)c2ccc(-c3ccc(OC(F)(F)F)cc3)cc12	23.7603	1	0.632	0.368	TP	0.0571	YES
#	1208	CC1CN(c2c(F)c(F)c3c(=O)c(C(=O)O)cn(C4CC4)c3c2F)CC(C)N1	-8.32816	0	0.0029	-0.0029	TN	0.0751	YES
+	2531	Nc1nc(Nc2ccc(S(N)(=O)=O)cc2)nn1C(=O)c1c(F)cccc1F	25.4499	1	0.6651	0.3349	TP	2.0585	No
*	939	Cc1ccc(S(=O)(=O)NC(Cc2ccccc2)C(=O)CCl)cc1	6.78326	0	0.2991	-0.2991	TN	0.0355	YES
-	2535	S=C(NCc1ccc2c(c1)OCO2)N1CCN(c2ncnc3c2oc2ccccc23)CC1	21.8567	1	0.5947	0.4053	TP	1.0755	No
#	1815	COc1ccc(C2CC(=O)c3c(O)cc(OC4OC(COC5OC(C)C(O)C(O)C5O)C(O)C(O)C4O)cc3O2)cc1O	2.48169	0	0.2148	-0.2148	TN	0.0854	YES
*	2545	c1ccc2c(CCNc3ccc(Nc4ccncc4)cc3)c[nH]c2c1	30.8688	1	0.7713	0.2287	TP	0.0571	YES
*	3000	CC(C)CC(N)C(O)C(=O)NC(C(=O)NC(C(=O)NC(CC(=O)O)C(=O)O)C(C)C)C(C)C	-8.90599	0	-0.0084	0.0084	TN	0.0411	YES
#	2565	COc1ccc(C2CC(c3ccccc3)=NN2c2ccc(S(N)(=O)=O)cc2)cc1	28.0464	1	0.716	0.284	TP	0.0546	YES
-	2637	CC(CC(C(N)=O)(c1ccccc1)c1ccccc1)N(C)C	19.6258	0	0.5509	-0.5509	FP	0.0449	YES
-	2568	Cc1c(C(=O)Nc2cccc(C(F)(F)F)c2)cc(-c2ccccc2)n1CCCN1CCOCC1	30.2188	1	0.7586	0.2414	TP	0.0607	YES
-	1535	FCOC(C(F)(F)F)C(F)(F)F	4.12051	0	0.2469	-0.2469	TN	0.0269	YES
+	2573	CCOC(CN1C(=O)C(CC(=O)Nc2ccc(C)cc2)(NC(=O)Nc2ccc(C)cc2)c2ccccc21)OCC	51.4838	1	1.1755	-0.1755	TP	0.0694	YES
*	3032	COc1cc(C(C)C)c(Oc2cnc(NC(CO)CO)nc2N)cc1I	-6.9323	0	0.0303	-0.0303	TN	0.0341	YES
*	2578	CN(C)c1ccc(C2Nc3ccc4ccccc4c3C3=C2C(=O)CC(C)(C)C3)cc1Br	29.231	1	0.7392	0.2608	TP	1.0799	No
*	1736	CC1(C)OC2COC3(COS(N)(=O)=O)OC(C)(C)OC3C2O1	10.6716	0	0.3754	-0.3754	TN	1.0506	No
+	2600	CN1CC2c3ccccc3Oc3ccc(Cl)cc3C2C1	34.3435	1	0.8395	0.1605	TP	0.0424	YES
*	3220	CCCC(C(=O)O)c1c(C)nc2ccc(Cl)cc2c1-c1ccccc1	17.7127	0	0.5134	-0.5134	FP	0.0413	YES
-	2621	CCCCCCCCCCCCCCCc1cccc(O)c1C(=O)O	17.1297	1	0.502	0.498	TP	0.0229	YES
+	960	C1CNCCN1	5.29582	0	0.27	-0.27	TN	0.0098	YES
*	2651	CN1CCCC(CC2c3ccccc3Sc3ccccc32)C1	37.5627	1	0.9026	0.0974	TP	0.042	YES
+	3118	COC(=O)C1(c2ccc(C)cc2)CC1CN1CCC(O)(c2ccccc2)CC1	16.7764	0	0.4951	-0.4951	TN	0.0502	YES
#	2691	Cc1cnc(NC(=O)Nc2cc(Br)c(C)cc2OCC2CNCCO2)cn1	42.8541	1	1.0063	-0.0063	TP	0.0577	YES
#	869	Cc1ccccc1O	5.20096	0	0.2681	-0.2681	TN	0.0095	YES
-	2693	c1ccc2c(Oc3nc(Nc4ccc(N5CCOCC5)cc4)c4ncn(C5CCCCC5)c4n3)cccc2c1	21.235	1	0.5825	0.4175	TP	0.153	YES
*	3531	CCCCCC(O)C=CC1C(O)CC(=O)C1CCCCCCC(=O)O	1.77084	0	0.2009	-0.2009	TN	0.0253	YES
*	2701	COc1cccc(C(C)NCCCc2ccccc2Cl)c1	19.4827	1	0.5481	0.4519	TP	0.0365	YES
*	368	O=[N+]([O-])c1cc([As](=O)(O)O)ccc1O	-1.71232	0	0.1326	-0.1326	TN	0.0213	YES
-	2745	CC(C)C1C(=O)NC(CO)Cc2c[nH]c3cccc(c23)N1C	22.2347	1	0.6021	0.3979	TP	1.0338	No
*	1607	COc1ccc2[nH]c(S(=O)Cc3ncc(C)c(OC)c3C)nc2n1	-11.5673	0	-0.0606	0.0606	TN	0.0417	YES
#	2758	CN1CCC(COc2cnc(-c3cccc(Cn4nc(-c5cccc(C#N)c5)ccc4=O)c3)nc2)CC1	31.6566	1	0.7868	0.2132	TP	0.1143	YES
+	3099	O=C(Nc1cccnc1)c1cc(-c2ccnc(F)c2)ccc1OCc1ccccc1	21.8556	0	0.5946	-0.5946	FP	0.0554	YES
-	2764	CC(C)CC(NC(=O)C(Cc1ccccc1)NC(=O)OCc1ccccc1)C(=O)C=O	9.07317	1	0.344	0.656	FN	0.0481	YES
+	3688	CCC(=O)OC1CCC2C3CCC4CC(=O)C(C)CC4(C)C3CCC12C	8.41044	0	0.3311	-0.3311	TN	0.0464	YES
-	2765	O=C(NCc1ccccc1)C(Cc1ccccc1)NC(=O)C1OC1C(=O)NCCc1ccc(O)cc1	18.892	1	0.5365	0.4635	TP	0.0587	YES
*	2591	CC1(C)C2CCC1(C)C(O)C2	10.6955	0	0.3758	-0.3758	TN	0.0235	YES
-	2770	COc1ccc(-c2oc3c(CC=C(C)C)c(O)cc(O)c3c(=O)c2O)cc1	10.3308	1	0.3687	0.6313	FN	2.0517	No
#	3587	O=c1cc(-c2ccc(O)c(O)c2)oc2c(C3OC(CO)C(O)C(O)C3O)c(O)cc(O)c12	-10.1175	0	-0.0322	0.0322	TN	0.0675	YES
+	2775	CC(C)(N)c1ccc(-c2nc3ccccc3nc2-c2ccccc2)cc1	20.0665	1	0.5596	0.4404	TP	0.0445	YES
+	125	CCc1cccc2c3c([nH]c12)C(CC)(CC(=O)O)OCC3	2.45025	0	0.2142	-0.2142	TN	0.0296	YES
#	2782	CCc1nc(-c2cccc(C)c2)c(-c2ccnc(NC(=O)c3ccccc3)c2)s1	35.3016	1	0.8582	0.1418	TP	0.0541	YES
#	3578	CC1CCC2(O)C(C)(C)C3CCC2(C)C1C3	8.37505	0	0.3304	-0.3304	TN	0.0215	YES
-	2783	O=C1NC(=O)C(=Cc2cccc(C(F)(F)F)c2)S1	21.3204	1	0.5841	0.4159	TP	1.0398	No
#	530	CCN1CC2(COC)C(O)CC(OC)C34C5CC6(O)C(OC)C(O)C(OC(C)=O)(C5C6OC(=O)c5ccccc5)C(C(OC)C23)C14	18.0768	0	0.5206	-0.5206	FP	0.1443	YES
#	2789	COc1ccc2c(Oc3ccc(NC(=O)c4c(C)n(CC(C)(C)O)n(-c5ccccc5)c4=O)cc3F)ccnc2c1	37.945	1	0.9101	0.0899	TP	0.1224	YES
#	2194	Cc1cccc(-c2nc(C(C)(C)C)[nH]c2-c2ccc3nccnc3c2)n1	1.78734	0	0.2012	-0.2012	TN	0.0419	YES
+	2790	CN(C)CC(=O)N1CCC(c2ccc(NC(=O)c3ncc(C#N)[nH]3)c(C3=CCCCC3)c2)CC1	1.80931	1	0.2016	0.7984	FN	1.0538	No
*	1128	COc1ccc(C=CC(=O)O)cc1	0.03896	0	0.1669	-0.1669	TN	0.0161	YES
+	2803	NC(=O)c1cccc2cn(-c3ccc(C4CCCNC4)cc3)nc12	20.6824	1	0.5716	0.4284	TP	0.0565	YES
*	2408	CCC(CC)(CNC(=O)CCCO)c1cccc(OC)c1	14.8806	0	0.4579	-0.4579	TN	0.0252	YES
-	2822	CC(NC(=O)C(=O)Nc1ccccc1C(C)(C)C)C(=O)NC(CC(=O)O)C(=O)COc1c(F)c(F)cc(F)c1F	17.7445	1	0.514	0.486	TP	2.0536	No
*	1929	O=C(NNCS(=O)(=O)O)c1ccncc1	-4.88748	0	0.0703	-0.0703	TN	0.0244	YES
#	2825	Cc1c(NC(=O)OCC2COCCN2)cn2ncnc(Nc3ccc4c(cnn4Cc4cccc(F)c4)c3)c12	22.2057	1	0.6015	0.3985	TP	0.1054	YES
+	615	CC(=O)C1(O)CCC2C3CC(C)C4=CC(=O)C=CC4(C)C3(F)C(O)CC21C	2.20832	0	0.2095	-0.2095	TN	1.0589	No
*	2842	Cc1ccc(NC(=O)c2ccc(CN3CCC(N(C)C)C3)c(C(F)(F)F)c2)cc1Nc1ncc(-c2cncnc2)cn1	18.8193	1	0.5351	0.4649	TP	0.0768	YES
#	529	CNC1C(O)C(NC)C2OC3(O)C(=O)CC(C)OC3OC2C1O	7.7863	0	0.3188	-0.3188	TN	0.057	YES
-	2849	CCC1C=CC=CCC(C)C(O)C(C)(O)C(=O)C(C)C(O)C(C)C(=O)C(C)C(O)C(C)C=CC(=O)OC2C(C)C(CC1)OC1(CCC(C)C(CC(C)O)O1)C2C	27.7627	1	0.7105	0.2895	TP	0.0832	YES
*	2438	COCC(NC(C)=O)C(=O)NCc1ccccc1	2.07482	0	0.2068	-0.2068	TN	0.0241	YES
#	2853	CC(C)(C)Cn1c(N)nc2ccc(-c3nc(C(C)(C)C)[nH]c3-c3ccc(F)cc3)nc21	27.965	1	0.7144	0.2856	TP	0.0594	YES
#	82	O=C1CCc2cc(OCCCCc3nnnn3C3CCCCC3)ccc2N1	-5.18379	0	0.0645	-0.0645	TN	0.0506	YES
-	2856	COc1cc(Nc2nc3ccccc3nc2NS(=O)(=O)c2ccc(NC(=O)c3ccc(C)c(OC)c3)cc2)cc(OC)c1	19.006	1	0.5388	0.4612	TP	0.0658	YES
+	2831	C=CC(=O)Nc1cccc(Sc2nc(Nc3ccc(N4CCN(C)CC4)cc3)ncc2Cl)c1	32.786	0	0.8089	-0.8089	FP	0.0924	YES
*	2857	CNC(=O)c1ccc2c(c1)NC(=O)/C2=C(/Nc1cccc(CN(C)C)c1)c1ccccc1	30.0975	1	0.7562	0.2438	TP	0.065	YES
+	578	c1ccc(-c2ccc(C(c3ccccc3)n3ccnc3)cc2)cc1	30.046	0	0.7552	-0.7552	FP	0.0403	YES
#	2861	CCCCCCCCCCCCc1ccc(S(=O)(=O)Nc2nncs2)cc1	23.0188	1	0.6174	0.3826	TP	0.0478	YES
*	3438	CNC1C(O)C(OC2C(NC(=O)C(O)CN)CC(N)C(OC3OC(CN)C(O)C(O)C3O)C2O)OCC1(C)O	-7.6785	0	0.0156	-0.0156	TN	0.0903	YES
+	2884	C=C1C(=O)C23C(O)C1CCC2C12COC3(O)C(O)C1C(C)(C)CCC2O	15.0696	1	0.4616	0.5384	FN	0.0571	YES
#	373	CN1C(=O)OC(C)(C)C1=O	2.56945	0	0.2165	-0.2165	TN	0.0131	YES
+	2888	CNC(C)C1C(O)CC2(C)C3CCC4C(C)(C)C(NC)CCC45CC35CCC12C	35.4338	1	0.8608	0.1392	TP	4.0681	No
-	2556	COc1cc(Oc2ccnc3cc(OC)c(OC)cc23)ccc1NC(=O)NC(C)c1nccs1	15.532	0	0.4707	-0.4707	TN	0.0553	YES
-	2899	O=C1NC(=O)/C(=C/c2ccc(-c3ccc(F)cc3)o2)S1	28.5662	1	0.7262	0.2738	TP	1.0411	No
+	3358	O=C(NC1CCCC(CO)C1)C1CCN(c2nc3cc(Cl)c(-c4ccc(Cl)cc4)cc3o2)CC1	15.6611	0	0.4732	-0.4732	TN	3.0784	No
-	2903	Cn1cc(-c2ccncc2)c(-c2ccc(OCc3ccc4ccccc4n3)cc2)n1	17.1939	1	0.5032	0.4968	TP	0.0777	YES
-	3317	CCCC(C)NC(=O)c1ccc(Cl)c(Cl)c1	17.5511	0	0.5103	-0.5103	FP	0.0218	YES
-	2943	COc1cc(NC(=O)c2ccc(-c3ccc(Cl)cc3)o2)cc(OC)c1	24.6151	1	0.6487	0.3513	TP	0.0443	YES
-	3156	O=c1[nH]c(C2CCCN2)nc2c1oc1ccc(Cl)cc12	3.4262	0	0.2333	-0.2333	TN	0.0451	YES
#	2953	COc1cc(CCc2cc(NC(=O)c3ccc(N4CC(C)NC(C)C4)cc3)[nH]n2)cc(OC)c1	26.6369	1	0.6884	0.3116	TP	0.0669	YES
#	1552	Cc1ccccc1-n1c(CF)nc2ccc(N)cc2c1=O	16.0459	0	0.4807	-0.4807	TN	0.0374	YES
#	2965	CC(O)(C#Cc1ccc2c(c1)N(c1nc(N)ncc1Cl)CC2)c1nccs1	16.6545	1	0.4927	0.5073	FN	0.0571	YES
#	1539	CCCCCC(O)C=CC1C(O)CC2OC(=CCCCC(=O)O)CC21	5.06528	0	0.2655	-0.2655	TN	0.0376	YES
+	2968	NC(=O)c1cccc(-c2cc(Nc3ccc(OC(F)(F)F)cc3)ncn2)c1	20.5473	1	0.569	0.431	TP	0.0511	YES
+	3566	Cc1ccc(-n2nc(C(C)(C)C)cc2NC(=O)NCc2cc(F)ccc2Oc2ccc3c(cnn3CCO)c2)cc1	16.6326	0	0.4922	-0.4922	TN	1.0749	No
+	2995	NC(=O)c1noc(C(CCCC2CCCCC2)CC(=O)NO)n1	26.5835	1	0.6873	0.3127	TP	3.0333	No
#	1821	C=CC1=C(C(=O)O)N2C(=O)C(NC(=O)C(=NOCC(=O)O)c3csc(N)n3)C2SC1	-0.94077	0	0.1477	-0.1477	TN	0.0861	YES
*	3001	CC1(N2CCC(n3c(C4CCCNC4)nc4ccccc43)CC2)CCCCCCC1	25.9483	1	0.6749	0.3251	TP	0.0945	YES
-	2132	O=C(O)Cc1cccc(-c2cc(CCCCCCc3ccc(OC4OC(CO)C(O)C(O)C4O)c(-c4cccc(CC(=O)O)c4)c3)ccc2OC2OC(CO)C(O)C(O)C2O)c1	13.3897	0	0.4287	-0.4287	TN	0.1307	YES
#	3003	Cc1ccc(NC(=O)Nc2cc(C(F)(F)F)ccc2F)cc1Nc1ccc2c(c1)NC(=O)C2=Cc1ccc[nH]1	28.9565	1	0.7339	0.2661	TP	0.085	YES
+	1541	Clc1ccc(C(Cn2ccnc2)OCc2ccsc2Cl)c(Cl)c1	15.6438	0	0.4729	-0.4729	TN	0.0666	YES
#	3020	c1ccc(CNc2nc(N3CCOc4ccccc43)nc3c2CCCC3)cc1	29.2792	1	0.7402	0.2598	TP	0.0714	YES
-	2875	Cn1c(CNc2ccc(C(=N)N)cc2)nc2cc(C(=O)N(CCC(=O)O)c3ccccn3)ccc21	6.0577	0	0.2849	-0.2849	TN	0.0694	YES
+	3026	N#Cc1c(C2CCNCC2)cc(-c2c(O)cccc2OCC2CC2)nc1N	21.6725	1	0.5911	0.4089	TP	0.0475	YES
#	2152	O=C1c2c(O)cccc2C(C2OC(CO)C(O)C(O)C2O)c2cc(CO)cc(O)c21	12.6733	0	0.4146	-0.4146	TN	0.0669	YES
-	3033	O=C1CSC(=O)N1C(CCc1ccncc1)COc1ccc(-c2cccc([N+](=O)[O-])c2)cc1	26.7949	1	0.6915	0.3085	TP	0.057	YES
+	2812	O=C(c1ccc(F)c(F)c1Nc1ccc(I)cc1F)N1CC(O)(C2CCCCN2)C1	26.6355	0	0.6884	-0.6884	FP	4.0504	No
*	3073	COc1ccc(C(O)C(C)Oc2ccc(C3OC(c4ccc(OC(C)C(O)c5ccc(OC)c(OC)c5)c(OC)c4)C(C)C3C)cc2OC)cc1OC	33.5636	1	0.8242	0.1758	TP	0.1343	YES
*	580	COc1ccccc1OCC(O)COC(N)=O	3.94784	0	0.2436	-0.2436	TN	0.0233	YES
*	3081	Cc1cc(Nc2ncc(Cl)c(Nc3ccccc3S(=O)(=O)C(C)C)n2)c(OC(C)C)cc1C1CCNCC1	37.2155	1	0.8958	0.1042	TP	0.0595	YES
#	3657	C=CC(=O)N1CC(N2CCN(C(=O)CNc3cc(C4(C)CC4)c(Cl)cc3O)CC2)C1	8.7217	0	0.3372	-0.3372	TN	0.0762	YES
+	3083	NC(=O)c1cnc(NC2CCCCC2N)nc1Nc1cccc(-n2nccn2)c1	18.9106	1	0.5369	0.4631	TP	0.0539	YES
*	2057	CCC(C(=O)NC(=O)NC(C)=O)c1ccccc1	5.8755	0	0.2814	-0.2814	TN	0.0245	YES
+	3084	CCOc1ccccc1-n1c(C(C)N2CCN(C(=O)COc3ccc(Cl)cc3)CC2)nc2ccccc2c1=O	31.7951	1	0.7895	0.2105	TP	0.0648	YES
+	1683	C=C(C)C1CCC2(C)CCC3(C)C(CCC4C5(C)CCC(O)C(C)(C)C5CCC43C)C12	4.45709	0	0.2535	-0.2535	TN	0.0888	YES
#	3089	Cc1cn(CCN2CCN(c3ccccc3-c3cc(C#N)cc(C(=O)NCCCN4CCCC4)c3)CC2)c2ccccc12	30.092	1	0.7561	0.2439	TP	0.0818	YES
-	3279	CCN(c1cc(C#CCN2CCOCC2)cc(C(=O)NCc2c(C)cc(C)[nH]c2=O)c1C)C1CCC(N(C)CCOC)CC1	15.0212	0	0.4607	-0.4607	TN	0.0648	YES
-	3110	Cn1c(NCC(N)Cc2ccccc2)nc(-c2ccncc2)c(-c2ccc3ccccc3c2)c1=O	32.4325	1	0.802	0.198	TP	0.0747	YES
+	3704	CC#CC(=O)N1CCC(n2c(=O)n(-c3ccc(Oc4ccccc4)cc3)c3c(N)ncnc32)C1	13.6456	0	0.4337	-0.4337	TN	0.096	YES
-	3121	COc1ccc(CNC(=O)Nc2ncc([N+](=O)[O-])s2)cc1	18.6249	1	0.5313	0.4687	TP	0.0367	YES
*	715	COc1ccc(CC(C)NCC(O)c2ccc(O)c(NC=O)c2)cc1	5.92	0	0.2822	-0.2822	TN	0.0329	YES
*	3122	N#Cc1ccc2[nH]cc(CCCCN3CCN(c4ccc5oc(C(N)=O)cc5c4)CC3)c2c1	41.8476	1	0.9866	0.0134	TP	1.0966	No
#	2761	CCn1c(C(=O)N(C2CC2)C2CC2)cc2c3c(ncn3C)c(Nc3cc(C)n(C)n3)nc21	-1.25706	0	0.1415	-0.1415	TN	0.0864	YES
+	3125	CCCN1CCN(c2ccc(C(=O)NC3(C(=O)NCC#N)CCCCC3)cc2)CC1	11.4104	1	0.3899	0.6101	FN	0.0468	YES
*	385	c1ccc2[nH]c(-c3cscn3)nc2c1	7.48834	0	0.313	-0.313	TN	0.0332	YES
-	3145	O=c1ccc2ccc(OCCCCN3CCN(c4cccc5sccc45)CC3)cc2[nH]1	21.3488	1	0.5847	0.4153	TP	0.0872	YES
+	2097	CN(C)c1cc(NC(=O)CNC(C)(C)C)c(O)c2c1CC1CC3C(N(C)C)C(=O)C(C(N)=O)C(=O)C3(O)C(O)=C1C2=O	10.6804	0	0.3756	-0.3756	TN	0.0756	YES
+	3147	CNC(C)C(=O)NC(C(=O)N1CCCC1c1nc(C(=O)c2ccc(F)cc2)cs1)C1CCCCC1	32.1991	1	0.7974	0.2026	TP	1.0602	No
+	1005	CCOc1nc2cccc(C(=O)OC(C)OC(=O)OC3CCCCC3)c2n1Cc1ccc(-c2ccccc2-c2nn[nH]n2)cc1	-0.05749	0	0.165	-0.165	TN	0.0686	YES
+	3148	COc1cc(NC(=O)Nc2cccc(CNC(=O)OC3CCOC3)c2)ccc1-c1cnco1	31.7521	1	0.7887	0.2113	TP	0.0646	YES
+	1658	CCOC(=O)C(CCc1ccccc1)NC(C)C(=O)N1Cc2ccccc2CC1C(=O)O	13.5121	0	0.4311	-0.4311	TN	0.0494	YES
*	3155	Cc1ncc(NC(=O)c2ccc(CN3CCN(C)CC3)c(C(F)(F)F)c2)cc1Nc1nccc(-c2cccnc2)n1	25.8434	1	0.6728	0.3272	TP	0.0761	YES
+	3782	CC(=O)N1CCC(Nc2cc(C(=O)NCC(O)CN3CCc4ccccc4C3)ncn2)CC1	4.16169	0	0.2478	-0.2478	TN	0.0751	YES
*	3170	CCCC(NC1CCc2cc(F)cc(F)c2C1)C(=O)Nc1cn(C(C)(C)CNCC(C)(C)C)cn1	27.6997	1	0.7092	0.2908	TP	0.0576	YES
#	1279	Cc1[nH]c(=O)c(C#N)cc1-c1ccc2nccn2c1	0.40341	0	0.1741	-0.1741	TN	0.035	YES
#	3205	COc1cccc(N2CCN(C3=Nc4c(F)cccc4C(CC(=O)O)N3c3cc(C(F)(F)F)ccc3OC)CC2)c1	39.6957	1	0.9444	0.0556	TP	0.1015	YES
#	642	Cc1cn(C2C=CC(CO)O2)c(=O)[nH]c1=O	1.2458	0	0.1906	-0.1906	TN	0.0444	YES
*	3208	O=C1NC(=O)C(c2cnc3ccccn23)=C1c1cn2c3c(cc(F)cc13)CN(C(=O)N1CCCCC1)CC2	30.2525	1	0.7593	0.2407	TP	0.0745	YES
-	2883	CC1(C)CC(C(=O)O)C2CCC3(C)C(=CCC4C5(C)CCC(O)C(C)(C)C5CCC43C)C2C1	3.98983	0	0.2444	-0.2444	TN	0.101	YES
+	3212	Cn1cc(-c2cc(Oc3cc(F)c(NC(=O)C4(C(=O)Nc5ccccc5)CC4)cc3F)ccn2)cn1	50.8432	1	1.1629	-0.1629	TP	1.1227	No
+	1945	CCC(=C(CC)c1ccc(OP(=O)(O)O)cc1)c1ccc(OP(=O)(O)O)cc1	-4.038	0	0.087	-0.087	TN	12.0406	No
#	3224	C=CC1(C)CC(OC(=O)CSC2CC3CCC(C2)N3C)C2(C)C(C)CCC3(CCC(=O)C32)C(C)C1O	32.9114	1	0.8114	0.1886	TP	0.0692	YES
#	225	CC(N/C(=N/C#N)Nc1ccncc1)C(C)(C)C	9.9927	0	0.3621	-0.3621	TN	0.0317	YES
+	3239	CS(=O)(=O)N1CCC(NC(=O)c2[nH]ncc2NC(=O)c2c(Cl)cccc2Cl)CC1	4.76633	1	0.2596	0.7404	FN	0.0602	YES
*	1036	COc1ccc(C=CC(=O)O)cc1OC	-0.39191	0	0.1585	-0.1585	TN	0.0193	YES
+	3246	CCCCCOc1ccc(-c2ccc(-c3ccc(C(=O)NC4CC(O)C(O)NC(=O)C5C(O)C(C)CN5C(=O)C(C(C)O)NC(=O)C(C(O)C(O)c5ccc(O)cc5)NC(=O)C5CC(O)CN5C(=O)C(C(C)O)NC4=O)cc3)cc2)cc1	57.5169	1	1.2938	-0.2938	TP	1.2302	No
*	1724	Nc1nc(C(=CCC(=O)O)C(=O)NC2C(=O)N3C(C(=O)O)=CCSC23)cs1	-1.64098	0	0.134	-0.134	TN	0.0666	YES
+	3251	CCCC1(CCC)CCC2(CCN(CCCN(CC)CC)C2)CC1	14.262	1	0.4458	0.5542	FN	0.0332	YES
#	329	CC1=CC(=O)c2ccccc2C1=O	2.92784	0	0.2236	-0.2236	TN	0.0203	YES
-	3252	CC1(C)CN2C(CSC(=NC3CCCCC3)NC3CCCCC3)=CSC2=N1	27.4771	1	0.7049	0.2951	TP	1.0645	No
+	3835	Cn1c(C=CCO)c(CO)c2c1C(=O)C=C(N1CC1)C2=O	13.6646	0	0.4341	-0.4341	TN	0.055	YES
+	3266	CON(C)C(=O)N1N=C(c2cc(F)ccc2F)SC1(CCCN)c1ccccc1	26.2468	1	0.6807	0.3193	TP	1.058	No
-	3106	O=C(COc1cccc2c(=O)[nH]ccc12)c1ccccc1	10.1538	0	0.3652	-0.3652	TN	0.0299	YES
-	3278	Cc1nc(C)c(CN2CCN(C(c3ccc(F)cc3)c3ccc(F)cc3)CC2)nc1C	15.9546	1	0.479	0.521	FN	0.0467	YES
#	837	c1ccc2sc(SSc3nc4ccccc4s3)nc2c1	12.3811	0	0.4089	-0.4089	TN	0.0766	YES
-	3286	Nc1ncnc2c1c(-c1cccc(OCc3ccccc3)c1)cn2C1CC(CN2CCCC2)C1	12.5371	1	0.412	0.588	FN	1.066	No
#	2630	CCC1OC(OC(c2cnc[nH]2)C(NC(=O)c2nc(C(CC(N)=O)NCC(N)C(N)=O)nc(N)c2C)C(=O)NC(C)C(O)C(C)C(=O)NC(C(=O)NCCc2nc(-c3nc(C(=O)NCCCCNC(=N)N)cs3)cs2)C(C)O)C(OC2OC(CO)C(O)C(OC(N)=O)C2O)C(C)C1C	2.44774	0	0.2142	-0.2142	TN	0.1925	YES
-	3297	Cc1cncc(CN2CCC(=C3c4ccc(Cl)cc4CCc4cccnc43)CC2)c1	24.9482	1	0.6553	0.3447	TP	0.0937	YES
+	3485	N#Cc1cccc(-c2c[nH]c3ncnc(N4CCOCC4)c23)c1	12.5431	0	0.4121	-0.4121	TN	0.0567	YES
#	3302	Cn1nc(C(C)(C)C)cc1C(=O)NC(Cc1cccc(Cl)c1)C(=O)NCC#N	24.7235	1	0.6509	0.3491	TP	0.0481	YES
+	1026	CCN(CC)CCOc1ccc2c(c1)C(=O)c1cc(OCCN(CC)CC)ccc1-2	15.3874	0	0.4678	-0.4678	TN	1.0465	No
-	3312	CCC(C)Nc1cc(C(=O)NC2CC3CCC(C2)N3c2ccc(C(=O)C3CC3)cn2)c(C)cc1C(N)=O	20.1844	1	0.5619	0.4381	TP	0.069	YES
-	3557	COc1c(C)cc(NC(=O)c2nn(Cc3ccc(F)cc3)c3c2CN(C(=O)c2ccc[nH]2)CC3(C)C(N)=O)cc1C	3.33203	0	0.2315	-0.2315	TN	0.0743	YES
#	3322	CNCc1ccc(-c2cc(-c3nc(-c4ccc(S(=O)(=O)C(C)C)cc4)cnc3N)on2)cc1	23.2388	1	0.6218	0.3782	TP	0.0831	YES
#	3193	Fc1ccccc1-c1nc2ccn(Cc3ccc(-c4ccc(C(F)(F)F)cc4C(F)(F)F)nn3)cc-2n1	-5.56025	0	0.0572	-0.0572	TN	0.1147	YES
-	3327	CC(NC(=O)C(Cc1ccccc1)NC(=O)OCc1ccccc1)C(=O)CF	8.77397	1	0.3382	0.6618	FN	0.0442	YES
-	3834	Cc1c(NC(=O)c2cc(C(N)=O)nc3cc(F)ccc23)c(C(F)(F)F)nn1Cc1ccc(C(C)(C)C)cc1	6.03418	0	0.2845	-0.2845	TN	0.0722	YES
#	3331	OCCOc1ccc(C(=C(CCCl)c2ccccc2)c2ccccc2)cc1	32.8171	1	0.8095	0.1905	TP	0.0349	YES
#	1977	CON=C(C(=O)NC1C(=O)N2C(C(=O)OCOC(=O)C(C)(C)C)=C(C)CSC12)c1csc(N)n1	1.23955	0	0.1905	-0.1905	TN	0.0784	YES
*	3338	CC(C)(C)c1ccc(CN2CCN(C(c3ccccc3)c3ccc(Cl)cc3)CC2)cc1	34.8621	1	0.8496	0.1504	TP	0.0486	YES
+	3637	CC(C)CC(CC(=O)NO)C(=O)NC(Cc1ccc2ccccc2c1)C(=O)NC(C)C(=O)NCCN	11.1102	0	0.384	-0.384	TN	0.0537	YES
#	3348	Cc1nc2ccc(-n3ncc(C(=O)c4cc5ccccc5[nH]4)c3N)cc2[nH]1	38.2712	1	0.9165	0.0835	TP	0.0924	YES
-	3104	Nc1nccc(-c2c(-c3ccc(F)cc3)ncn2C2CCCCC2)n1	18.5957	0	0.5307	-0.5307	FP	1.0427	No
#	3356	Nc1nc(Nc2ccc3c(c2)CCC(N2CCCC2)CC3)nn1-c1cc2c(nn1)-c1ccccc1CCC2	25.491	1	0.6659	0.3341	TP	0.0908	YES
-	650	CC12CCC3c4ccc(O)cc4CCC3C1CCC2=O	15.5207	0	0.4704	-0.4704	TN	0.0588	YES
-	3359	CCCCCCCCCC(=O)OCCN1CCN(CCCN2c3ccccc3Sc3ccc(C(F)(F)F)cc32)CC1	41.5362	1	0.9805	0.0195	TP	0.072	YES
-	2423	CCN(CC)c1ccc([C+](c2ccc(N(CC)CC)cc2)c2cc(S(=O)(=O)O)ccc2S(=O)(=O)O)cc1	5.14582	0	0.267	-0.267	TN	0.0576	YES
*	3361	CC(C)(CNC(=O)c1cccc(-c2noc(C(F)(F)F)n2)c1)c1coc(-c2ccccc2)n1	50.1784	1	1.1499	-0.1499	TP	3.0766	No
*	2357	Cc1c(F)cc2c(=O)c(C(=O)O)cn3c2c1CCC3C	0.4297	0	0.1746	-0.1746	TN	0.0312	YES
+	3368	CC(C=CC1CC1(C)c1ccc2c(c1)C(C)(C)CCC2(C)C)=CC(=O)O	18.4839	1	0.5285	0.4715	TP	0.042	YES
+	3694	O=C(Nc1cccc(C(F)(F)F)c1)c1cccc2cc(Oc3cc(CO)ncn3)ccc12	15.0632	0	0.4615	-0.4615	TN	0.0646	YES
*	3370	CC#CC(CC(=O)O)c1ccc(OCc2cccc(-c3ccc(C(F)(F)F)cc3)c2)cc1	28.6638	1	0.7281	0.2719	TP	0.0508	YES
+	1064	O=C(CCc1ccc(O)cc1)c1c(O)cc(O)cc1OC1OC(CO)C(O)C(O)C1O	13.7231	0	0.4352	-0.4352	TN	0.0494	YES
-	3381	Fc1ccc(-c2[nH]c(-c3ccccc3F)nc2-c2ccncc2)cc1	27.6605	1	0.7084	0.2916	TP	0.04	YES
#	2919	COC(=O)C1=COC(OC2OC(CO)C(O)C(O)C2O)C2C(CO)=CCC12	3.25084	0	0.2299	-0.2299	TN	0.0592	YES
#	3382	O=C(CCCN1CCC(n2c(=S)[nH]c3ccccc32)CC1)c1ccc(F)cc1	39.214	1	0.935	0.065	TP	0.0646	YES
#	2036	CC(=O)OC1CC2CCC3C(CCC4(C)C3CC(N3CC[N+](C)(C)CC3)C4OC(C)=O)C2(C)CC1N1CC[N+](C)(C)CC1	25.6401	0	0.6688	-0.6688	FP	0.0714	YES
#	3384	Clc1cc2c(NC3CCCC3)nnc(-c3ccncc3)c2cc1Cl	13.9932	1	0.4405	0.5595	FN	0.0491	YES
#	1579	CCOc1nc2cccc(C(=O)O)c2n1Cc1ccc(-c2ccccc2-c2nn[nH]n2)cc1	-3.66215	0	0.0944	-0.0944	TN	0.055	YES
#	3390	O=C(O)c1ccc(CCCc2ccc(OCCc3ccc(F)cc3)cc2)o1	23.6543	1	0.6299	0.3701	TP	0.044	YES
-	3476	CCC(CN)CC(C)CNCC(O)CNCC(CC)CC(CC)CN	12.5069	0	0.4114	-0.4114	TN	0.0275	YES
-	3398	CN1CCC(c2c(O)cc(O)c3c(=O)cc(-c4ccc(C(F)(F)F)cc4Cl)oc23)C1CO	6.76555	1	0.2988	0.7012	FN	0.0787	YES
*	1270	O=P(O)(O)C(Cl)(Cl)P(=O)(O)O	-5.2222	0	0.0638	-0.0638	TN	6.0127	No
-	3411	O=C(Nc1ncc([N+](=O)[O-])s1)c1ccccc1O	23.248	1	0.6219	0.3781	TP	1.0422	No
-	1600	CC(O)C1C(=O)N2C(C(=O)O)=C(SC3CNC(CNS(N)(=O)=O)C3)C(C)C12	1.80653	0	0.2016	-0.2016	TN	0.053	YES
+	3415	COc1cc(N2CCN(C)CC2)ccc1Nc1nccc(-c2cn(C)c3cnccc23)n1	23.0061	1	0.6172	0.3828	TP	0.058	YES
*	487	CCc1cccc(CC)c1NC(=O)CN(CC(=O)O)CC(=O)O	-1.14188	0	0.1438	-0.1438	TN	0.0283	YES
#	3463	CCCCNc1ncc2c(-c3ccc(CN4CCN(C)CC4)cc3)cn(C3CCC(O)CC3)c2n1	23.0549	1	0.6182	0.3818	TP	0.072	YES
+	1097	CC(C)(C)c1ccc(O)cc1	6.78264	0	0.2991	-0.2991	TN	0.0128	YES
*	3464	COc1ccc(C(C)(C)C)cc1CNC1C2CCN(CC2)C1C(c1ccccc1)c1ccccc1	33.491	1	0.8228	0.1772	TP	0.0566	YES
*	572	CC(=O)NS(=O)(=O)c1ccc(N)cc1	-8.0687	0	0.008	-0.008	TN	0.026	YES
*	3469	O=C1Nc2nc(-c3c(O)cccc3OCC3CC3)cc(C3CCCNC3)c2CO1	25.6139	1	0.6683	0.3317	TP	0.0686	YES
*	316	Cc1cccc(C)c1NC1=NCCCS1	1.78868	0	0.2012	-0.2012	TN	0.0235	YES
-	3475	CC(C)C(O)(c1ccc2cc(OC(F)F)c(OC(F)F)cc2c1)c1cn[nH]n1	20.5439	1	0.5689	0.4311	TP	0.0495	YES
-	3257	COc1ccc(-c2cnc3c(-c4cccc5ncccc45)cnn3c2)cc1	3.43061	0	0.2334	-0.2334	TN	0.0877	YES
-	3483	O=C1NNc2nc(CN3Cc4ccccc4C3)nc3cccc1c23	30.4287	1	0.7627	0.2373	TP	2.0662	No
-	3910	COc1ccc(-c2c(Cl)ncn2-c2ccc(S(N)(=O)=O)cc2)cc1F	9.85212	0	0.3593	-0.3593	TN	3.0476	No
#	3508	CCCCCCCCCCCCCCCCOc1nc2ccc(C)cc2c(=O)o1	21.1983	1	0.5818	0.4182	TP	0.0389	YES
+	3698	Cc1c(CN2CCC(Nc3ncnc4sc(CC(F)(F)F)cc34)CC2)ccc2c1cc(C#N)n2Cc1cn[nH]c1	0.8785	0	0.1834	-0.1834	TN	3.0974	No
*	3511	COCCNC(=O)Nc1ccc2nc(-c3cccs3)c(-c3cccs3)nc2c1	29.8937	1	0.7522	0.2478	TP	0.0723	YES
#	1140	CC12C=CC(=O)C=C1C(F)CC1C2C(O)CC2(C)C1CCC2(O)C(=O)CO	7.84474	0	0.32	-0.32	TN	0.0495	YES
-	3514	CC1CN(CC(=O)N2CC(C)(C)c3ncc(Cc4ccc(F)cc4)cc32)C(CN2CCOCC2C)CN1	19.3605	1	0.5457	0.4543	TP	0.0885	YES
+	564	CN(C)CCOC(=O)C(c1ccccc1)C1(O)CCCC1	16.3923	0	0.4875	-0.4875	TN	0.0348	YES
+	3525	CC1=C2CC3C(CCC4CC(NS(C)(=O)=O)CCC43C)C2CCC2(C1)OC1CC(C)CNC1C2C	18.4973	1	0.5288	0.4712	TP	0.0881	YES
+	3377	CC(=O)N1N=C(c2ccc(N)cc2)c2cc3c(cc2CC1C)OCO3	13.3555	0	0.428	-0.428	TN	0.0557	YES
+	3530	CCCCCCC(C)(C)c1cc(O)c2c(c1)OC(C)(C)C1CC=C(CO)CC21	23.9991	1	0.6367	0.3633	TP	0.0409	YES
#	2628	Cn1nnnc1SCC1=C(C(=O)O)N2C(=O)C(NC(=O)C(O)c3ccccc3)C2SC1	-0.94915	0	0.1476	-0.1476	TN	0.0754	YES
+	3532	COc1ccccc1C(=O)Nc1cc2c(cc1N1CCCC1)n(C)c(=O)n2C	20.5912	1	0.5699	0.4301	TP	2.0561	No
-	951	O=C(O)CCC(=O)OCC(NC(=O)C(Cl)Cl)C(O)c1ccc([N+](=O)[O-])cc1	8.07372	0	0.3244	-0.3244	TN	0.0354	YES
+	3544	C=CC(=O)Nc1cccc(C)c1Nc1ncc2cc(-c3c(Cl)c(OC)cc(OC)c3Cl)ccc2n1	29.9017	1	0.7524	0.2476	TP	3.0598	No
*	1024	CCOC(=O)C1=CC(OC(CC)CC)C(NC(C)=O)C(N)C1	-0.3599	0	0.1591	-0.1591	TN	0.0284	YES
-	3567	Cc1cc(C)c(CNC(=O)c2cc(-c3ccc(N4CCN(C)CC4)nc3)cc3c2c(C)cn3C(C)C)c(=O)[nH]1	13.5512	1	0.4318	0.5682	FN	0.0753	YES
#	1653	CC(NC(=O)Cc1cc(F)cc(F)c1)C(=O)NC(C(=O)OC(C)(C)C)c1ccccc1	15.4632	0	0.4693	-0.4693	TN	0.0433	YES
*	3586	COc1nc(OCc2cccc(-c3ccccc3)c2C)ccc1CNCCNC(C)=O	34.21	1	0.8368	0.1632	TP	0.0498	YES
-	3681	COc1cc(O)c(C(=O)Nc2nc(C(=O)NCCN(C(C)C)C(C)C)cs2)cc1OC	15.0717	0	0.4616	-0.4616	TN	0.0511	YES
-	3591	Nc1nc(OC(c2ccc(-c3cccc(F)c3)cc2)C(F)(F)F)cc(-c2ccc(CC(N)C(=O)O)cc2)n1	23.3881	1	0.6247	0.3753	TP	0.0691	YES
#	838	CN(C)C1C(=O)C(C(N)=O)C(=O)C2(O)C(O)=C3C(=O)c4c(O)cccc4C(C)(O)C3C(O)C12	-9.13836	0	-0.013	0.013	TN	0.0764	YES
*	3593	CCOC(=O)NC1CCC2C(C1)CC1C(=O)OC(C)C1C2C=Cc1ccc(-c2cccc(F)c2)cn1	31.5044	1	0.7838	0.2162	TP	0.0659	YES
#	2206	COC(C(=O)C(O)C(C)O)C1Cc2cc3cc(OC4CC(OC5CC(O)C(OC)C(C)O5)C(OC(C)=O)C(C)O4)c(C)c(O)c3c(O)c2C(=O)C1OC1CC(OC2CC(OC3CC(C)(O)C(OC(C)=O)C(C)O3)C(O)C(C)O2)C(O)C(C)O1	-5.74738	0	0.0535	-0.0535	TN	0.159	YES
#	3607	COCCNCc1ccc(-c2cc3nccc(Oc4ccc(NC(=S)NC(=O)Cc5ccc(F)cc5)cc4F)c3s2)nc1	36.295	1	0.8777	0.1223	TP	0.1312	YES
+	2517	O=C(Nc1cccnc1)N1CCC(Cc2cccc(Oc3ccc(C(F)(F)F)cn3)c2)CC1	15.4072	0	0.4682	-0.4682	TN	0.0658	YES
-	3619	CC12CCC3c4ccc(OC(=O)N(CCCl)CCCl)cc4CCC3C1CCC2OP(=O)(O)O	9.05632	1	0.3437	0.6563	FN	5.0697	No
*	3376	Cc1c(F)cc(C(=O)NC2CC2)cc1-c1c(F)cn2c(C(C)(C)C)nnc2c1F	10.7843	0	0.3776	-0.3776	TN	2.0567	No
-	3638	CCC(NC(=O)C(CS(=O)(=O)CC1CC1)NC(c1ccc(F)cc1)C(F)(F)F)C(=O)C(=O)NC1CC1	6.6297	1	0.2961	0.7039	FN	0.07	YES
-	2425	CNC(=O)c1c(I)c(NC(C)=O)c(I)c(C(=O)O)c1I	10.3957	0	0.37	-0.37	TN	0.0267	YES
+	3644	COc1ccc2c(c1)C1(CC1c1ccc3c(C=Cc4ccc(CN5CC(C)OC(C)C5)cc4)[nH]nc3c1)C(=O)N2	45.2574	1	1.0534	-0.0534	TP	0.1226	YES
*	637	CC1=Nc2ccc(Cl)cc2S(=O)(=O)N1	23.4567	0	0.626	-0.626	FP	0.0287	YES
#	3653	Cn1ncc2cc(-c3cnc(N)c(Cl)c3N3CCC4(CCNC4=O)CC3)ccc21	44.3147	1	1.0349	-0.0349	TP	0.0755	YES
*	3761	O=C(O)CNC(=O)c1ncc(-c2cccc(Cl)c2)cc1O	16.0057	0	0.48	-0.48	TN	0.0344	YES
+	3685	CC(C)CC1C(=O)OC(Cc2ccc(N3CCOCC3)cc2)C(=O)N(C)C(CC(C)C)C(=O)OC(C)C(=O)N(C)C(CC(C)C)C(=O)OC(Cc2ccc(N3CCOCC3)cc2)C(=O)N(C)C(CC(C)C)C(=O)OC(C)C(=O)N1C	29.0406	1	0.7355	0.2645	TP	0.1062	YES
-	557	C(=Cc1ccccc1)CN1CCN(C(c2ccccc2)c2ccccc2)CC1	33.4624	0	0.8222	-0.8222	FP	0.0476	YES
-	3708	COc1cc(N2CCN(C)CC2)ccc1Nc1ncc2c(n1)N(C)c1ccccc1C(=O)N2	15.7888	1	0.4757	0.5243	FN	0.0579	YES
-	3678	Cc1c(-c2c(-c3ccc(F)o3)sc3ncnc(OC(Cc4ccccc4OCc4ccnn4CC(F)(F)F)C(=O)O)c23)ccc(OCCN2CCN(C)CC2)c1Cl	3.80751	0	0.2408	-0.2408	TN	3.1434	No
+	3714	CC(C)(O)CNc1ncc(-c2ccnc(Nc3ccncc3)n2)c(CC2CC2)n1	20.5594	1	0.5692	0.4308	TP	0.0559	YES
*	1641	NCCNC(=O)c1ccc(Cl)cn1	14.1997	0	0.4445	-0.4445	TN	0.0181	YES
+	3721	CC1(C)C(=O)N(c2ccc(C#N)c(C(F)(F)F)c2)C(=S)N1Cc1ccc(-c2cn[nH]n2)cc1	14.7525	1	0.4554	0.5446	FN	0.0689	YES
-	2336	CC1=C2N=C(C=C3N=C(C(C)=C4N=C(C(CC(N)=O)C4(C)CCC(=O)NCC(C)OP(=O)(O)OC4C(CO)OC([n+]5cn([Co]C#N)c6cc(C)c(C)cc65)C4O)C4(C)N=C1C(CCC(N)=O)C4(C)CC(N)=O)C(CCC(N)=O)C3(C)C)C(CCC(N)=O)C2(C)CC(N)=O	-6.12111	0	0.0462	-0.0462	TN	6.2154	No
+	3725	CCc1ccc(N(CC(C)C)S(=O)(=O)c2ccc(OCC3CCOCC3)c(CO)c2)cc1	19.6619	1	0.5516	0.4484	TP	0.0448	YES
-	832	O=C(O)COc1ccccc1	2.33	0	0.2118	-0.2118	TN	0.0127	YES
-	3732	c1ccc2c(-c3cnn4cc(-c5ccc(OCCN6CCOCC6)cc5)cnc34)ccnc2c1	33.9415	1	0.8316	0.1684	TP	0.1111	YES
#	1530	CC(C)CC(NC(=O)C(Cc1c[nH]c2ccccc12)NC(=O)C(Cc1ccc(O)cc1)NC(=O)C(CO)NC(=O)C(Cc1c[nH]c2ccccc12)NC(=O)C(Cc1cnc[nH]1)NC(=O)C1CCC(=O)N1)C(=O)NC(CCCNC(=N)N)C(=O)N1CCCC1C(=O)NCC(N)=O	1.85452	0	0.2025	-0.2025	TN	0.1525	YES
*	3739	CCCCCCCC(=O)NC(CN1CCCC1)C(O)c1ccc2c(c1)OCCO2	28.4902	1	0.7247	0.2753	TP	0.0512	YES
-	2297	O=c1cc(-c2ccc(O)c(-c3c(O)cc(O)c4c(=O)cc(-c5ccc(O)cc5)oc34)c2)oc2cc(O)cc(O)c12	17.1677	0	0.5027	-0.5027	FP	1.137	No
+	3742	C=CC(=O)NC1CCOCC1Nc1ncc2cc(-c3c(Cl)c(OC)cc(OC)c3Cl)ccc2n1	26.0407	1	0.6767	0.3233	TP	3.0593	No
#	2466	CCC(Nc1ncnc2nc[nH]c12)c1nc2cccc(F)c2c(=O)n1-c1ccccc1	10.4097	0	0.3702	-0.3702	TN	0.0554	YES
*	3747	Cn1cc(-c2ccc(-c3cncc(Cl)c3N3CCC4(CCNC4=O)CC3)cc2)cn1	48.1917	1	1.111	-0.111	TP	0.074	YES
-	2413	CCC(=O)OC1C=C2CCC3C(CCC4(C)C(OC(=O)CC)CCC34)C2CC1	14.0076	0	0.4408	-0.4408	TN	0.0607	YES
-	3755	CONC(=O)Nc1ccc(-c2sc3c(c2CN(C)Cc2ccccc2)c(=O)n(-c2ccccc2)c(=O)n3Cc2c(F)cccc2F)cc1	25.3878	1	0.6639	0.3361	TP	0.1066	YES
-	2688	CC=CC1C(C(=O)OCc2c(F)c(F)c(COC)c(F)c2F)C1(C)C	2.30005	0	0.2113	-0.2113	TN	0.0386	YES
+	3759	c1ccc(-c2cc(CCC3CCNCC3)c3ccccc3n2)cc1	31.7736	1	0.7891	0.2109	TP	1.0361	No
#	2416	NC(=O)NC1N=C(O[Al](O)O)NC1=O	-8.46859	0	0.0001	-0.0001	TN	0.03	YES
-	3776	COc1cc(C(=O)NC(=N)Nc2ccc(C)c(NC(=O)c3ccc(-c4ccccc4)cc3)c2)cc(OC)c1OC	29.7313	1	0.749	0.251	TP	0.0861	YES
-	346	Nc1ccc(S(=O)(=O)Nc2ncccn2)cc1	9.65414	0	0.3554	-0.3554	TN	0.0342	YES
#	3779	CC(C(=O)Nc1ccc(Cl)cc1)C1CCC(c2ccnc3ccc(F)cc23)CC1	31.3089	1	0.78	0.22	TP	0.0452	YES
*	1194	O=C(O)CNC(=O)c1ccccc1I	4.48029	0	0.254	-0.254	TN	0.0182	YES
-	3794	Cc1cc2cc(Oc3ccnc(Nc4cccc(CS(=O)(=O)NCCN(C)C)c4)n3)ccc2[nH]1	17.6081	1	0.5114	0.4886	TP	0.0749	YES
-	871	CN(C)C(=S)SSC(=S)N(C)C	7.40454	0	0.3113	-0.3113	TN	1.0238	No
#	3795	O=C(C=Cc1ccc(Cl)cc1)N1CCC2(CC1)CN(Cc1ccc(Cl)c(Cl)c1)C(=O)O2	28.2985	1	0.721	0.279	TP	0.0683	YES
-	3399	O=C(O)c1ccc(CN2CCC(CNC3CC3c3ccccc3)CC2)cc1	17.0202	0	0.4998	-0.4998	TN	0.0452	YES
-	3806	Cc1cc(OC(CCC(F)(F)F)c2ccc(C(=O)NCCC(=O)O)cc2)cc(C)c1-c1ccc(C(C)(C)C)cc1	19.3159	1	0.5449	0.4551	TP	0.0596	YES
+	3367	CN(C)CCNC(=O)COc1c2cccc1Cc1cccc(c1OCC(=O)NCCN(C)C)Cc1cccc(c1OCC(=O)NCCN(C)C)Cc1cccc(c1OCC(=O)NCCN(C)C)C2	26.8242	0	0.692	-0.692	FP	0.1059	YES
#	3809	CCNCCc1ccc(CN(CC)c2cc(OC)ccc2C2CCc3cc(O)ccc3C2)cc1	21.7787	1	0.5931	0.4069	TP	0.0479	YES
#	818	C=Cc1ccccc1	8.31053	0	0.3291	-0.3291	TN	0.0135	YES
*	3823	CC1CC(N)CC(c2ccncc2NC(=O)c2ccc(F)c(-c3c(F)cccc3F)n2)C1	27.5943	1	0.7071	0.2929	TP	0.0529	YES
#	1693	CCn1cc(C(=O)O)c(=O)c2cc(F)c(N3CCN(C)CC3)cc21	9.28192	0	0.3481	-0.3481	TN	0.0474	YES
-	3840	CC1=C(c2ccc(O)cc2)C(c2ccc(OCCN3CCCCC3)cc2)Oc2cc(O)ccc21	16.9288	1	0.4981	0.5019	FN	0.0566	YES
+	3498	NC(=NOCC(O)CN1CCCCC1)c1cccnc1	13.0126	0	0.4213	-0.4213	TN	0.0412	YES
+	3841	CCN(CC)CCNc1ccc(C)c2sc3ccccc3c(=O)c12	28.7378	1	0.7296	0.2704	TP	0.0486	YES
*	2977	NC1=NC2CSC(CCCCC(=O)O)C2N1	-7.57558	0	0.0176	-0.0176	TN	0.0302	YES
*	3848	CC(C)(O)C1CCC(Nc2ccc3ncc(-c4cccc(C(F)(F)F)c4)n3n2)CC1	27.4195	1	0.7037	0.2963	TP	1.0694	No
+	2123	CC(C(=O)O)c1ccc(C2CCCCC2)c2ccccc12	16.1794	0	0.4834	-0.4834	TN	0.0285	YES
+	3913	Cc1cc(O)ccc1C(C)(C)C	7.27073	1	0.3087	0.6913	FN	0.0125	YES
*	3632	Nc1ncnc2c(C3NC(CO)C(O)C3O)c[nH]c12	-1.70523	0	0.1327	-0.1327	TN	0.0357	YES
#	3951	Cc1ccc(NCCN(C)CCNc2ccnc3cc(Cl)ccc23)c2c(=O)c3ccccc3sc12	39.5269	1	0.9411	0.0589	TP	0.0611	YES
-	2599	O=C1Cc2cc(CCN3CCN(c4nsc5ccccc45)CC3)c(Cl)cc2N1	16.3228	0	0.4862	-0.4862	TN	0.0872	YES
*	3953	CCCCOCCOc1ccc(-c2ccc3c(c2)/C=C(/C(=O)Nc2ccc(S(=O)Cc4cncn4CCC)cc2)CCCN3CC(C)C)cc1	27.6854	1	0.7089	0.2911	TP	0.0912	YES
*	1627	CCCCCCCCCCCCCCCCC(C(=O)O)C(O)(CC(=O)O)C(=O)O	-0.393	0	0.1585	-0.1585	TN	0.027	YES
#	3954	N#CC1(c2ccc3c(N)ncnn23)OC(CO)C(O)C1O	14.5099	1	0.4506	0.5494	FN	0.0467	YES
#	197	Cc1[nH]c(=O)c(C#N)cc1-c1ccncc1	-0.58161	0	0.1548	-0.1548	TN	0.0286	YES
-	3956	CCC(CC)COC(=O)C(C)NP(=O)(OCC1OC(C#N)(c2ccc3c(N)ncnn23)C(O)C1O)Oc1ccccc1	17.4596	1	0.5085	0.4915	TP	3.0782	No
#	503	Cc1ncc(C[n+]2csc(CCO)c2C)c(N)n1	4.69936	0	0.2583	-0.2583	TN	0.0432	YES

## Sheet: Table S4
Set	ID	SMILES	DCW	Expr	Calc	Expr-Calc	Class	DefectSMILES	Applicability
*	6	CN1CCN(CCCN2c3ccccc3Sc3ccc(C(F)(F)F)cc32)CC1	23.5876	1	1.0298	-0.0298	TP	0.0454	YES
#	2575	Cc1ccnc(NS(=O)(=O)c2ccc(NC(=O)Nc3ccc(S(=O)(=O)Nc4nccc(C)n4)cc3)cc2)n1	4.6494	0	0.2427	-0.2427	TN	0.0708	YES
-	10	CN1C2CCC1CC(OC(c1ccccc1)c1ccccc1)C2	20.7466	1	0.9117	0.0883	TP	0.0251	YES
+	2421	NC(=O)C1(N2CCCCC2)CCN(CCCN2c3ccccc3CCc3ccc(Cl)cc32)CC1	21.5286	0	0.9442	-0.9442	FP	0.0465	YES
*	13	CN(C)CCC=C1c2ccccc2Sc2ccc(Cl)cc21	18.4448	1	0.8161	0.1839	TP	0.0305	YES
+	1173	COC1=CC23CCCN2CCc2cc4c(cc2C3C1O)OCO4	7.87416	0	0.3767	-0.3767	TN	2.0481	No
#	15	c1cc(-c2sc(-c3ccncc3)c(-c3ccncc3)c2-c2ccncc2)ccn1	23.8975	1	1.0427	-0.0427	TP	0.0617	YES
+	2801	C#CCN(C)CC1=Cc2ccccc2Oc2ccccc21	13.7883	0	0.6225	-0.6225	FP	1.0256	No
*	16	CN(C)CCC=C1c2ccccc2C=Cc2ccccc21	19.968	1	0.8794	0.1206	TP	0.0191	YES
-	1222	CC(C)CCCC(C)NC(C)C	4.67999	0	0.244	-0.244	TN	0.0042	YES
*	20	CN(C)c1ccccc1CN1CCCN(Cc2ccccc2N(C)C)C1c1ccncc1	34.354	1	1.4773	-0.4773	TP	0.0245	YES
-	2221	CC(=O)Nc1ccc(C)c(C(=O)NC(C)c2cccc3ccccc23)c1	19.2236	0	0.8484	-0.8484	FP	0.0294	YES
*	21	CN1CCC(CN2c3ccccc3Sc3ccccc32)C1	22.5753	1	0.9877	0.0123	TP	0.0295	YES
#	2540	Cn1cc(-c2ccc3nnc(Sc4ccc5ncccc5c4)n3n2)cn1	9.53562	0	0.4458	-0.4458	TN	0.1008	YES
*	22	CNCCC=C1c2ccccc2CCc2ccccc21	20.2309	1	0.8903	0.1097	TP	0.018	YES
-	2267	CC(C)(C)c1cc(C(C)(C)C)c(NC(=O)c2c[nH]c3ccccc3c2=O)cc1O	8.0052	0	0.3822	-0.3822	TN	2.0241	No
#	25	O=C1CSC2(CCN(CCCN3c4ccccc4Sc4ccc(Cl)cc43)CC2)N1	27.7193	1	1.2015	-0.2015	TP	0.0869	YES
+	808	CCCCCCCCCCCC[N+](C)(C)CCOc1ccccc1	6.4213	0	0.3164	-0.3164	TN	0.017	YES
-	34	Clc1ccc2c(c1)C(N1CCNCC1)=Nc1ccccc1O2	18.9353	1	0.8364	0.1636	TP	0.0251	YES
#	1796	CS(=O)(=O)c1ccc(C(O)C(CF)NC(=O)C(Cl)Cl)cc1	-3.95441	0	-0.1149	0.1149	TN	0.0346	YES
#	56	CN(C)CCC=C1c2ccccc2CCc2ccccc21	19.8745	1	0.8755	0.1245	TP	0.018	YES
*	2417	Cc1cc2c(cc1CC(=O)c1sccc1S(=O)(=O)Nc1onc(C)c1Cl)OCO2	0.86097	0	0.0853	-0.0853	TN	3.0501	No
#	57	CCCCc1oc2ccccc2c1C(=O)c1cc(I)c(OCCN(CC)CC)c(I)c1	25.6098	1	1.1138	-0.1138	TP	0.0262	YES
+	2389	Cc1c[nH]c(-c2cnc(NCCNc3ccc(C#N)cn3)nc2-c2ccc(Cl)cc2Cl)n1	3.91496	0	0.2122	-0.2122	TN	1.0577	No
#	72	CC(C)COCC(CN(Cc1ccccc1)c1ccccc1)N1CCCC1	14.9753	1	0.6719	0.3281	TP	0.0184	YES
*	615	CC(=O)C1(O)CCC2C3CC(C)C4=CC(=O)C=CC4(C)C3(F)C(O)CC21C	11.2104	0	0.5154	-0.5154	FP	0.0664	YES
*	99	CN1CCC(=C2c3ccccc3C=Cc3ccccc32)CC1	9.00145	1	0.4236	0.5764	FN	0.0285	YES
-	2461	C=C(NC(=O)C(=C)NC(=O)c1csc(C2=NC3c4csc(n4)C4NC(=O)c5csc(n5)C(C(C)(O)C(C)O)NC(=O)C5CSC(=N5)C(=CC)NC(=O)C(C(C)O)NC(=O)c5csc(n5)C3(CC2)NC(=O)C(C)NC(=O)C(=C)NC(=O)C(C)NC(=O)C(C(C)CC)NC2C=Cc3c(C(C)O)cc(nc3C2O)C(=O)OC4C)n1)C(N)=O	-4.52161	0	-0.1384	0.1384	TN	2.3419	No
#	100	CN1CCN(C2=Nc3cc(Cl)ccc3Nc3ccccc32)CC1	17.0835	1	0.7595	0.2405	TP	0.04	YES
*	2840	Cn1c(N2CCCCS2(=O)=O)nc(C(=O)NCc2ccc(F)cc2)c(O)c1=O	-1.28054	0	-0.0037	0.0037	TN	0.0613	YES
+	101	CCN(CC)CCCC(C)Nc1ccnc2cc(Cl)ccc12	11.684	1	0.5351	0.4649	TP	0.0175	YES
+	715	COc1ccc(CC(C)NCC(O)c2ccc(O)c(NC=O)c2)cc1	2.83465	0	0.1673	-0.1673	TN	1.0196	No
-	104	CN(C)CCCN1c2ccccc2CCc2ccc(Cl)cc21	19.2324	1	0.8488	0.1512	TP	0.0191	YES
+	2900	Cc1cnc(CNC(=O)c2c(=O)c3ccc(N4CCCN(C)CC4)nc3n3c2sc2ccccc23)cn1	5.4195	0	0.2747	-0.2747	TN	1.0738	No
*	106	CN(C)CCCN1c2ccccc2Sc2ccc(Cl)cc21	17.3068	1	0.7688	0.2312	TP	0.0296	YES
#	1028	COc1cc(OC)cc(OC)c1	7.40835	0	0.3574	-0.3574	TN	0.0109	YES
#	116	CNCCCN1c2ccccc2CCc2ccccc21	19.0928	1	0.843	0.157	TP	0.0171	YES
*	472	COc1cc(OC)c(C(=O)CCCN2CCCC2)c(OC)c1	8.44077	0	0.4003	-0.4003	TN	0.0287	YES
-	121	CCN(CC)CCOC(=O)C1(C2CCCCC2)CCCCC1	8.46381	1	0.4012	0.5988	FN	0.0251	YES
-	3388	Cc1nn(C)c(COc2ccc(N3CCN(S(=O)(=O)N(C)C)CC3)cc2)c1-c1cccc2c(CCCOc3cccc4ccccc34)c(C(=O)O)n(CCN3CCOCC3)c12	10.4202	0	0.4826	-0.4826	TN	0.1306	YES
-	129	O=c1c2ccccc2[se]n1-c1ccccc1	15.0668	1	0.6757	0.3243	TP	1.0222	No
-	3171	O=C(NO)C1(CS(=O)(=O)c2ccc(Oc3ccc(Cl)cc3)cc2)CCOCC1	8.05573	0	0.3843	-0.3843	TN	1.0528	No
+	133	CNCCC(Oc1ccc(C(F)(F)F)cc1)c1ccccc1	14.1052	1	0.6357	0.3643	TP	0.029	YES
*	575	CCOc1ccc2nc(S(N)(=O)=O)sc2c1	4.88638	0	0.2526	-0.2526	TN	1.0313	No
#	152	O=C1Nc2ccc(I)cc2C1=Cc1cc(Br)c(O)c(Br)c1	26.9006	1	1.1675	-0.1675	TP	0.0571	YES
*	1036	COc1ccc(C=CC(=O)O)cc1OC	-0.04778	0	0.0475	-0.0475	TN	0.0172	YES
*	166	O=S(=O)(c1cccc2c(I)cccc12)N1CCCNCC1	19.312	1	0.8521	0.1479	TP	1.0326	No
*	2359	O=C(OCC(O)CO)c1ccccc1Nc1ccnc2c(C(F)(F)F)cccc12	17.2828	0	0.7678	-0.7678	FP	0.0377	YES
-	169	CN(C)CCCN1c2ccccc2CCc2ccccc21	18.7365	1	0.8282	0.1718	TP	0.0171	YES
+	2998	CC(=O)OC1C(C)OC(Oc2c(-c3ccc(O)cc3)oc3cc(O)cc(O)c3c2=O)C(O)C1OC(C)=O	4.8111	0	0.2494	-0.2494	TN	4.0512	No
+	177	CCCc1c(OCCCOc2ccc(OCC(=O)O)cc2)ccc(C(C)=O)c1O	7.10308	1	0.3447	0.6553	FN	0.0316	YES
*	1285	CC(=O)C1CCC2C3CC=C4CC(O)CCC4(C)C3CCC12C	6.66394	0	0.3264	-0.3264	TN	0.0494	YES
#	181	CN(C)C(=O)C(CCN1CCC(O)(c2ccc(Cl)cc2)CC1)(c1ccccc1)c1ccccc1	15.8801	1	0.7095	0.2905	TP	0.0362	YES
-	1265	NC(=O)c1cc[n+](CC2=C(C(=O)O)N3C(=O)C(NC(=O)C(c4ccccc4)S(=O)(=O)O)C3SC2)cc1	-1.18942	0	0.0001	-0.0001	TN	0.0761	YES
+	185	CCOC(=O)N1CCC(=C2c3ccc(Cl)cc3CCc3cccnc32)CC1	9.10738	1	0.428	0.572	FN	0.0389	YES
-	707	COc1ccc2c(c1)CCC1C2CCC2(C)C(NCCCCCCN3C(=O)C=CC3=O)CCC12	12.816	0	0.5821	-0.5821	FP	2.0517	No
-	208	CNCCCC12CCC(c3ccccc31)c1ccccc12	13.7151	1	0.6195	0.3805	TP	0.0216	YES
#	851	O=C(c1ccccc1)C(O)c1ccccc1	12.1316	0	0.5537	-0.5537	FP	0.0117	YES
+	212	COc1ccccc1N1CCN(CC(O)COc2cccc3ccccc23)CC1	15.2421	1	0.683	0.317	TP	1.0356	No
*	1978	C[N+](C)(CCOc1ccccc1)Cc1cccs1	3.84366	0	0.2092	-0.2092	TN	1.0209	No
#	216	COC(=O)C1=C(C)NC(C)=C(C(=O)OCCN(C)Cc2ccccc2)C1c1cccc([N+](=O)[O-])c1	14.5648	1	0.6548	0.3452	TP	0.034	YES
-	3133	CC(O)C(C)Oc1nc(Nc2ccc(S(=N)(=O)C3CC3)cc2)ncc1C(F)(F)F	13.5363	0	0.6121	-0.6121	FP	0.059	YES
#	222	CCN(CC)CC#CCOC(=O)C(O)(c1ccccc1)C1CCCCC1	12.5516	1	0.5711	0.4289	TP	0.0313	YES
-	871	CN(C)C(=S)SSC(=S)N(C)C	5.03853	0	0.2589	-0.2589	TN	2.0267	No
#	223	Cc1ccccc1C(OCCN(C)C)c1ccccc1	16.3637	1	0.7296	0.2704	TP	0.0108	YES
*	2829	CCc1c(C(=O)C(N)=O)c2c(OCC(=O)O)cccc2n1Cc1ccccc1	9.96893	0	0.4638	-0.4638	TN	0.029	YES
+	224	O=c1[nH]c2ccccc2n1CCCN1CCN(C(c2ccccc2)c2ccccc2)CC1	20.2889	1	0.8927	0.1073	TP	0.0314	YES
*	3902	CCOC(=O)C1=CCCCC1S(=O)(=O)Nc1ccc(F)cc1Cl	6.86219	0	0.3347	-0.3347	TN	1.0333	No
*	233	CC(CN1c2ccccc2Sc2ccccc21)N(C)C	17.2291	1	0.7655	0.2345	TP	0.0278	YES
+	1814	CNCC(O)c1ccc(OC(=O)C(C)(C)C)c(OC(=O)C(C)(C)C)c1	-0.19622	0	0.0413	-0.0413	TN	0.0188	YES
+	235	CCCNCC(O)COc1ccccc1C(=O)CCc1ccccc1	11.3407	1	0.5208	0.4792	TP	0.0194	YES
#	2165	Nc1ccn(CC(CO)OCP(=O)(O)O)c(=O)n1	-6.97285	0	-0.2403	0.2403	TN	0.0379	YES
#	239	OCCN1CCN(CCCN2c3ccccc3Sc3ccc(Cl)cc32)CC1	22.403	1	0.9806	0.0194	TP	0.0355	YES
-	2920	O=C(O)C1=COC(OC2OC(CO)C(O)C(O)C2O)C2C(CO)=CCC12	8.01045	0	0.3824	-0.3824	TN	1.0422	No
*	240	CN(C)CCCN1c2ccccc2Sc2ccccc21	16.8109	1	0.7482	0.2518	TP	0.0276	YES
-	2276	Nc1nccc(-c2ccc3noc(-c4ccc(Cl)cc4)c3c2)n1	5.9546	0	0.297	-0.297	TN	0.0554	YES
#	246	CCC(=O)c1ccc2c(c1)N(CCCN(C)C)c1ccccc1S2	19.3006	1	0.8516	0.1484	TP	0.0235	YES
-	2839	Nc1nc(N)c2nc(-c3cccc(O)c3)c(-c3cccc(O)c3)nc2n1	9.27007	0	0.4348	-0.4348	TN	0.0461	YES
#	250	CNCCCC1c2ccccc2C=Cc2ccccc21	18.3114	1	0.8105	0.1895	TP	0.0166	YES
-	2258	COc1ccc(COc2ccc(Cc3cnc(N)nc3N)cc2OC)cc1	9.14622	0	0.4296	-0.4296	TN	0.0439	YES
#	252	CN1CCN(CCCN2c3ccccc3Sc3ccc(Cl)cc32)CC1	21.4702	1	0.9418	0.0582	TP	0.0331	YES
*	201	NCCS	-0.67129	0	0.0216	-0.0216	TN	0.01	YES
-	262	COC(=O)C1C2CC3c4[nH]c5cc(OC)ccc5c4CCN3CC2CC(OC(=O)c2cc(OC)c(OC)c(OC)c2)C1OC	40.1488	1	1.7181	-0.7181	TP	0.1121	YES
#	3389	CCNCc1nc2c(N)nc3ccccc3c2n1CC(C)(C)O	-1.10165	0	0.0037	-0.0037	TN	0.0315	YES
#	263	O=C(c1ccc(OCCN2CCCCC2)cc1)c1c(-c2ccc(O)cc2)sc2cc(O)ccc12	14.3045	1	0.644	0.356	TP	0.0415	YES
-	3029	CC1CCC2C1C(OC(=O)C=Cc1ccccc1)C1(C(C)C)CC(OC(=O)CO)C2(C)O1	10.7328	0	0.4955	-0.4955	TN	0.0378	YES
*	278	Oc1ccc(-c2nc(-c3ccncc3)c(-c3ccc(F)cc3)[nH]2)cc1	21.3428	1	0.9365	0.0635	TP	0.0386	YES
-	3375	CN(C)c1nc2c(Br)c(Br)c(Br)c(Br)c2n1CC(=O)O	9.70921	0	0.453	-0.453	TN	0.0919	YES
#	279	O=C(CCCN1CCC2(CC1)C(=O)NCN2c1ccccc1)c1ccc(F)cc1	22.7269	1	0.994	0.006	TP	0.0314	YES
-	609	COC1CC2CCC(C)C(O)(O2)C(=O)C(=O)N2CCCCC2C(=O)OC(C(C)CC2CCC(O)C(OC)C2)CC(=O)C(C)C=C(C)C(O)C(OC)C(=O)C(C)CC(C)C=CC=CC=C1C	8.72737	0	0.4122	-0.4122	TN	0.0853	YES
#	288	CN1CCN(CCC=C2c3ccccc3Sc3ccc(S(=O)(=O)N(C)C)cc32)CC1	17.8232	1	0.7902	0.2098	TP	0.043	YES
#	1896	CCN(CC)CCOC(=O)C(O)(c1ccccc1)c1ccccc1	6.31831	0	0.3121	-0.3121	TN	0.0232	YES
#	291	OC(CCN1CCCCC1)(c1ccccc1)C1CCCCC1	17.9036	1	0.7936	0.2064	TP	0.0204	YES
#	1162	COCCCOc1ccnc(CS(=O)c2nc3ccccc3[nH]2)c1C	9.51225	0	0.4448	-0.4448	TN	0.0429	YES
+	294	CN(C)CCCN1c2ccccc2Sc2ccc(C(F)(F)F)cc21	19.4242	1	0.8568	0.1432	TP	0.0419	YES
+	1132	COc1cc2ncnc(Nc3ccc(F)c(Cl)c3)c2cc1OCCCN1CCOCC1	7.26008	0	0.3512	-0.3512	TN	0.0477	YES
*	295	CC(CN(C)C)CN1c2ccccc2CCc2ccccc21	21.7905	1	0.9551	0.0449	TP	0.0166	YES
+	2133	CCOC(=O)c1ccc(OCCN2CC(O)C(O)C(O)C2CO)cc1	7.24835	0	0.3507	-0.3507	TN	0.0297	YES
-	297	Nc1nc(N)c2nc(-c3ccccc3)c(N)nc2n1	10.1578	1	0.4716	0.5284	FN	0.0371	YES
#	2652	CCOc1ccc2ccccc2c1C(=O)NC1C(=O)N2C1SC(C)(C)C2C(=O)O	7.51644	0	0.3619	-0.3619	TN	0.0538	YES
+	355	CCCCOc1cc(C(=O)NCCN(CC)CC)c2ccccc2n1	13.4069	1	0.6067	0.3933	TP	0.0239	YES
*	2418	CCCCC(O)C=C(C)C=CC=CC(=O)N1CCCC1=O	3.04334	0	0.176	-0.176	TN	0.0239	YES
+	372	CN(C(=O)CN(CCO)CC(=O)N(C)C(C)(C)Cc1ccccc1)C(C)(C)Cc1ccccc1	6.63297	1	0.3252	0.6748	FN	0.025	YES
*	1774	CCNCC(O)c1cccc(O)c1	5.28046	0	0.2689	-0.2689	TN	0.0071	YES
*	380	CN(C)CCCOc1nn(Cc2ccccc2)c2ccccc12	11.3352	1	0.5206	0.4794	TP	0.0305	YES
+	3352	C=C(C)C1CCC(C)=CC1c1c(O)cc(CCCCC)cc1O	13.9702	0	0.6301	-0.6301	FP	0.0174	YES
*	417	CN(C)CCC=C1c2ccccc2CSc2ccccc21	11.8862	1	0.5435	0.4565	TP	0.0257	YES
*	3740	Cc1nc2cccc(N)c2c(=O)n1C1CCC(=O)NC1=O	-9.14732	0	-0.3307	0.3307	TN	0.0306	YES
*	427	CC(C)N=c1cc2n(-c3ccc(Cl)cc3)c3ccccc3nc-2cc1Nc1ccc(Cl)cc1	19.6163	1	0.8647	0.1353	TP	0.0525	YES
+	1588	Nc1cccc2c1CN(C1CCC(=O)NC1=O)C2=O	3.88301	0	0.2109	-0.2109	TN	1.0269	No
-	434	CCCCc1cc2ccccc2c(OCCN(C)C)n1	8.40426	1	0.3988	0.6012	FN	0.0145	YES
+	3790	CCc1c(-c2ccccc2C)[nH]c2c(C#N)cnn2c1=O	7.07599	0	0.3436	-0.3436	TN	0.0332	YES
+	435	CCN(CC)CCNc1ccc(CO)c2sc3ccccc3c(=O)c12	12.9202	1	0.5865	0.4135	TP	0.0388	YES
+	211	CC(CCc1ccccc1)NC(C)C(O)c1ccc(O)cc1	13.7978	0	0.6229	-0.6229	FP	0.0114	YES
#	438	CC(=O)c1ccc2c(c1)N(CCCN(C)C)c1ccccc1S2	18.6999	1	0.8267	0.1733	TP	0.0228	YES
-	2664	CC12CCC3C4CCC(=O)C=C4CCC3C1CCC2OC(=O)CCc1ccccc1	4.98678	0	0.2567	-0.2567	TN	1.053	No
*	442	CC(=O)c1ccc2c(c1)N(CCCN1CCC(CCO)CC1)c1ccccc1S2	21.6324	1	0.9485	0.0515	TP	0.0299	YES
-	1809	C[N+]1(C)CCC(OC(=O)C(O)(c2ccccc2)C2CCCC2)C1	1.81304	0	0.1248	-0.1248	TN	0.0309	YES
*	452	CN1CCCC1CCOC(C)(c1ccccc1)c1ccc(Cl)cc1	15.7836	1	0.7055	0.2945	TP	0.0218	YES
*	3811	O=C(CCCCCCC(=O)N/N=C/c1ccc(N(c2ccccc2)c2ccccc2)cc1)NO	6.65929	0	0.3262	-0.3262	TN	0.0327	YES
#	508	CCN(CC)Cc1cc(Nc2ccnc3cc(Cl)ccc23)ccc1O	17.1749	1	0.7633	0.2367	TP	0.0295	YES
#	1979	Cc1ccc(Nc2c(F)cccc2Cl)c(CC(=O)O)c1	5.94839	0	0.2967	-0.2967	TN	0.0269	YES
-	510	COc1cc(C=CC(=O)C=C(O)C=Cc2ccc(O)c(OC)c2)ccc1O	4.86504	1	0.2517	0.7483	FN	0.0303	YES
#	918	CNCCc1ccccn1	8.54231	0	0.4045	-0.4045	TN	0.0067	YES
*	532	COc1cc2c3cc1Oc1c(OC)c(OC)cc4c1C(Cc1ccc(O)c(c1)Oc1ccc(cc1)CC3N(C)CC2)N(C)CC4	25.6909	1	1.1172	-0.1172	TP	0.0706	YES
+	706	CCCN1CCOC2c3cc(O)ccc3OCC21	10.3397	0	0.4792	-0.4792	TN	0.021	YES
#	533	COc1ccc2cc1Oc1ccc(cc1)CC1c3cc(c(OC)cc3CCN1C)Oc1c(OC)c(OC)cc3c1C(C2)N(C)CC3	27.6301	1	1.1978	-0.1978	TP	0.0612	YES
+	738	COC(=O)C1=C(C)NC(C)=C(C(=O)OC(C)C)C1c1cccc2nonc12	6.21939	0	0.308	-0.308	TN	0.0371	YES
#	538	Fc1ccc(C(c2ccc(F)cc2)N2CCN(CC=Cc3ccccc3)CC2)cc1	14.7001	1	0.6604	0.3396	TP	0.0404	YES
-	1677	C#CCNC1CCc2ccccc21	13.4151	0	0.607	-0.607	FP	0.0153	YES
#	550	COc1cc2nc(N3CCN(C(=O)C4COc5ccccc5O4)CC3)nc(N)c2cc1OC	20.8088	1	0.9143	0.0857	TP	0.1041	YES
+	2196	O=C1NC(=O)/C(=C/c2ccc3nccnc3c2)S1	2.53824	0	0.155	-0.155	TN	6.0292	No
#	582	C1CCC(C(CC2CCCCN2)C2CCCCC2)CC1	14.5886	1	0.6558	0.3442	TP	0.0251	YES
*	2375	CCCCCCCCCC=CC=CC=CC=CC=CC(=O)OCC	8.08902	0	0.3857	-0.3857	TN	0.0268	YES
+	584	CN1CCCN(C(c2ccccc2)c2ccc(Cl)cc2)CC1	13.3609	1	0.6048	0.3952	TP	0.0159	YES
+	61	CCC1(c2ccc(N)cc2)CCC(=O)NC1=O	-1.33392	0	-0.006	0.006	TN	0.0207	YES
#	592	CCN(CCCc1ccccc1)CCCc1ccccc1	17.2553	1	0.7666	0.2334	TP	0.0122	YES
+	3643	CC(C)NC(=O)N1CCC(NC2=Nc3cc(F)ccc3N(CC(F)F)c3ccc(Cl)cc32)C1	18.498	0	0.8183	-0.8183	FP	0.0556	YES
#	596	CN1CCN(C2=Nc3ccccc3Oc3ccc(Cl)cc32)CC1	13.5261	1	0.6116	0.3884	TP	0.0406	YES
-	2448	NCCS[As](SCCN)c1ccc(Nc2nc(N)nc(N)n2)cc1	12.4433	0	0.5666	-0.5666	FP	0.0508	YES
-	597	O=C(c1ccc(F)cc1)C1CCN(CCn2c(=O)[nH]c3ccccc3c2=O)CC1	16.6004	1	0.7394	0.2606	TP	3.0326	No
+	1478	FC(F)(F)C(F)(F)C(F)(F)C(F)(F)C(F)(F)C(F)(F)F	-5.30885	0	-0.1712	0.1712	TN	0.0748	YES
*	605	CCCCCC(=O)OC1(C(C)=O)CCC2C3CCC4=CC(=O)CCC4(C)C3CCC21C	13.5658	1	0.6133	0.3867	TP	0.0631	YES
#	2423	CCN(CC)c1ccc([C+](c2ccc(N(CC)CC)cc2)c2cc(S(=O)(=O)O)ccc2S(=O)(=O)O)cc1	3.38168	0	0.19	-0.19	TN	0.0451	YES
#	681	C=C1C(=O)OC2C1CCC(C)=CCCC1(C)OC21	20.7903	1	0.9135	0.0865	TP	0.0289	YES
+	3457	CNC(C)C(=O)NC(C(=O)N1CCCC1C(=O)Nc1sc(-c2ncco2)nc1-c1ccccc1)C1CCCCC1	6.76856	0	0.3308	-0.3308	TN	3.0626	No
*	687	CNCCCCOc1ccccc1Cc1ccccc1	14.4656	1	0.6507	0.3493	TP	0.0144	YES
-	3917	CCCCCCCCCCCC(=O)OCN1C(=O)CCc2ccc(OCCCCN3CCN(c4cccc(Cl)c4Cl)CC3)cc21	25.7072	0	1.1179	-1.1179	FP	3.0659	No
+	693	CCC(=C(c1ccccc1)c1ccc(OCCN(C)C)cc1)c1ccccc1	18.2915	1	0.8097	0.1903	TP	0.0213	YES
+	2980	COc1cc(CC(CO)C(CO)Cc2ccc(O)c(OC)c2)ccc1O	5.78614	0	0.29	-0.29	TN	0.0224	YES
*	695	Clc1ccc2c(c1)N=C(N1CCNCC1)c1ccccc1N2	19.5128	1	0.8604	0.1396	TP	0.0259	YES
-	392	O=c1cc(-c2ccccc2)oc2cc(O)cc(O)c12	3.20062	0	0.1825	-0.1825	TN	1.0269	No
-	776	CCC(=C(CC)c1ccc(O)cc1)c1ccc(O)cc1	8.72032	1	0.4119	0.5881	FN	0.0149	YES
+	974	CN1CCOC(c2ccccc2)c2ccccc2C1	12.2725	0	0.5595	-0.5595	FP	0.0177	YES
#	778	CCC1OC(=O)C(C)C(OC2CC(C)(OC)C(O)C(C)O2)C(C)C(OC2OC(C)CC(N(C)C)C2O)C(C)(O)CC(C)CN(C)C(C)C(O)C1(C)O	15.8165	1	0.7068	0.2932	TP	0.0574	YES
-	1837	Clc1ccc(CCC(Cn2ccnc2)Sc2c(Cl)cccc2Cl)cc1	10.0433	0	0.4669	-0.4669	TN	1.0433	No
#	784	CC(=O)Oc1ccccc1C(=O)Nc1ncc([N+](=O)[O-])s1	12.9104	1	0.586	0.414	TP	0.0326	YES
+	2586	COc1ccc2cc1Oc1cc3c(cc1OC)CC[N+](C)(C)C3Cc1ccc(cc1)Oc1c(OC)c(OC)cc3c1C(C2)[N+](C)(C)CC3	2.69229	0	0.1614	-0.1614	TN	1.053	No
#	785	Cc1c(O)cccc1C(=O)NC(CSc1ccccc1)C(O)CN1CC2CCCCC2CC1C(=O)NC(C)(C)C	28.4474	1	1.2318	-0.2318	TP	0.0499	YES
+	375	Nc1ccc(S(=O)(=O)NC(=O)c2ccccc2)cc1	6.51609	0	0.3203	-0.3203	TN	0.021	YES
-	836	C=CC1CN2CCC1CC2C(O)c1ccnc2ccc(OC)cc12	15.3939	1	0.6893	0.3107	TP	0.0311	YES
#	2095	Oc1ccc(C2CNCc3c2ccc(O)c3O)cc1O	-3.55244	0	-0.0982	0.0982	TN	0.0216	YES
-	858	Cc1ccc(-c2cc(C(F)(F)F)nn2-c2ccc(S(N)(=O)=O)cc2)cc1	21.6092	1	0.9476	0.0524	TP	0.0468	YES
*	2640	CC1=C(C(=O)O)N2C(=O)C(NC(=O)C(N)C3=CCC=CC3)C2SC1	-0.47538	0	0.0297	-0.0297	TN	2.0485	No
+	966	CCCCC(CC)CN1CN(CC(CC)CCCC)CC(C)(N)C1	14.8903	1	0.6683	0.3317	TP	0.0151	YES
#	1628	CC1CCCCN1CCCOC(=O)c1ccccc1	10.1118	0	0.4697	-0.4697	TN	0.0133	YES
*	994	N#Cc1ccc2c(c1)N(CCCN1CCC(O)CC1)c1ccccc1S2	20.1669	1	0.8876	0.1124	TP	0.0338	YES
#	1769	CC(O)C1C(=O)N2C(C(=O)O)=C(SC3CNC(C(=O)N(C)C)C3)C(C)C12	-8.3101	0	-0.2959	0.2959	TN	0.048	YES
+	1037	C=C1CCC2C(C)(CO)C(O)CCC2(C)C1CC=C1C(=O)OCC1O	10.2621	1	0.476	0.524	FN	0.0292	YES
*	1977	CON=C(C(=O)NC1C(=O)N2C(C(=O)OCOC(=O)C(C)(C)C)=C(C)CSC12)c1csc(N)n1	-9.41871	0	-0.342	0.342	TN	2.0802	No
-	1052	O=C(NC(=O)c1c(F)cccc1F)Nc1cc(Cl)c(OC(F)(F)C(F)C(F)(F)F)cc1Cl	10.4504	1	0.4838	0.5162	FN	0.0544	YES
*	3076	Cc1ccc(-c2ccc3c(ccc4sc5c(c43)NCC(C)NC5=O)n2)cn1	31.9413	0	1.377	-1.377	FP	1.0717	No
#	1075	Clc1ccc2c(c1)CCc1cccnc1C2=C1CCNCC1	23.0253	1	1.0064	-0.0064	TP	0.0255	YES
-	2245	O=C(O)c1ccc(O)c2ncc(N3CCOCC3)cc12	10.1308	0	0.4705	-0.4705	TN	0.0343	YES
-	1080	O=C1Nc2ccc(Cl)cc2C(C#CC2CC2)(C(F)(F)F)O1	20.2631	1	0.8916	0.1084	TP	0.0436	YES
-	3113	COc1ccc2cc(OCC3(C(=O)O)CN(C(=O)c4ccc(F)cc4)C3)ccc2c1	8.39365	0	0.3983	-0.3983	TN	0.0605	YES
*	1133	Cc1ccc(NC(=O)c2ccc(CN3CCN(C)CC3)cc2)cc1Nc1nccc(-c2cccnc2)n1	25.7057	1	1.1178	-0.1178	TP	0.0477	YES
-	1683	C=C(C)C1CCC2(C)CCC3(C)C(CCC4C5(C)CCC(O)C(C)(C)C5CCC43C)C12	1.83826	0	0.1259	-0.1259	TN	0.0601	YES
+	1144	CC(C)=CCOc1ccc(C=CC(=O)c2ccc(OCC=C(C)C)cc2OCC(=O)O)cc1	8.3219	1	0.3953	0.6047	FN	0.0379	YES
#	5	OCC(S)CS	3.67006	0	0.202	-0.202	TN	0.0162	YES
-	1158	O=C1CCc2ccc(OCCCCN3CCN(c4cccc(Cl)c4Cl)CC3)cc2N1	27.4091	1	1.1886	-0.1886	TP	3.0536	No
*	264	CCCN(CCC)CCc1cccc2c1CC(=O)N2	7.50214	0	0.3613	-0.3613	TN	0.0166	YES
*	1163	Cc1ccc(O)c(C(CCN(C(C)C)C(C)C)c2ccccc2)c1	11.5646	1	0.5301	0.4699	TP	0.0131	YES
-	272	OCc1cc(C(O)CNCCCCCCOCCCCc2ccccc2)ccc1O	18.4803	0	0.8175	-0.8175	FP	0.0236	YES
+	1167	CC1(CN2CCC(n3c(=O)[nH]c4ccccc43)CC2)OCc2ccccc2-n2cccc21	23.5806	1	1.0295	-0.0295	TP	1.0718	No
+	1678	CC(C)Nc1cccnc1N1CCN(C(=O)c2cc3cc(NS(C)(=O)=O)ccc3[nH]2)CC1	3.89108	0	0.2112	-0.2112	TN	1.033	No
+	1169	O=C(C=Cc1ccccc1)NC(NC(=S)Nc1cccc2cccnc12)C(Cl)(Cl)Cl	18.9054	1	0.8352	0.1648	TP	4.037	No
#	1631	CN1CCN(c2c(F)cc3c(=O)c(C(=O)O)cn(CCF)c3c2F)CC1	-6.00674	0	-0.2002	0.2002	TN	0.0387	YES
*	1172	COc1cc2c(Nc3ccc(NC(=O)c4ccccc4)cc3)ncnc2cc1OCCCN1CCOCC1	10.4812	1	0.4851	0.5149	FN	0.0663	YES
+	1730	Cc1ccsc1C=CC1=NCCCN1C	3.19332	0	0.1822	-0.1822	TN	1.0242	No
+	1239	O=[N+]([O-])c1ccc(O)c2ncccc12	8.68089	1	0.4103	0.5897	FN	0.0171	YES
*	2047	O=[Bi]O[As](=O)(O)c1ccc(NC(=O)CO)cc1	0.14621	0	0.0556	-0.0556	TN	0.0139	YES
*	1254	COc1ccc2cc1Oc1ccc(cc1)CC1c3c(cc4c(c3Oc3cc5c(cc3OC)CCN(C)C5C2)OCO4)CCN1C	17.7386	1	0.7867	0.2133	TP	1.1022	No
*	2696	CCCCCC=CCC=CCCCCCCCC(=O)O	6.46215	0	0.3181	-0.3181	TN	0.0185	YES
-	1260	CCCCC(C=O)NC(=O)C(CC(C)C)NC(=O)C(CC(C)C)NC(C)=O	2.34229	1	0.1468	0.8532	FN	0.0185	YES
*	1015	COC(=O)N/N=C/c1c[n+](O)c2ccccc2[n+]1O	-2.00586	0	-0.0339	0.0339	TN	0.0167	YES
*	1264	O=S(=O)(NCCNCC=Cc1ccc(Br)cc1)c1cccc2cnccc12	19.6689	1	0.8669	0.1331	TP	0.0496	YES
-	671	CN1C(=O)COc2c(C(=O)NC3CN4CCC3CC4)cc(Cl)cc21	10.3542	0	0.4798	-0.4798	TN	0.049	YES
-	1272	COCCOC(=O)C1=C(C)NC(C)=C(C(=O)OCC=Cc2ccccc2)C1c1cccc([N+](=O)[O-])c1	15.6713	1	0.7008	0.2992	TP	0.0394	YES
*	2617	CCCCS(=O)(=O)NC(Cc1ccc(OCCCCC2CCNCC2)cc1)C(=O)O	5.75449	0	0.2886	-0.2886	TN	0.0454	YES
*	1277	CC(C)c1ccc2c(c1)c(SC(C)(C)C)c(CC(C)(C)C(=O)O)n2Cc1ccc(Cl)cc1	12.6622	1	0.5757	0.4243	TP	0.041	YES
*	2332	CC(=O)Oc1ccc2c(c1)CCC1C2CCC2(C)C(O)CCC12	8.58713	0	0.4064	-0.4064	TN	0.0337	YES
*	1290	CN1CCCCC1CCN1c2ccccc2Sc2ccc(S(C)=O)cc21	22.9878	1	1.0049	-0.0049	TP	0.037	YES
#	3141	CC(C)Nc1nc2cc(Cl)c(Cl)cc2n1C1OC(CO)C(O)C1O	7.16246	0	0.3472	-0.3472	TN	0.0263	YES
+	1292	CN1CCC(=C2c3ccccc3CCc3sccc32)CC1	15.8315	1	0.7074	0.2926	TP	4.0276	No
-	3935	CC1CCCC(C)N1C(=S)Nc1cccc(C(F)(F)F)c1	14.5374	0	0.6537	-0.6537	FP	1.0295	No
+	1299	CCCCC(C=O)NC(=O)C(CC(C)C)NC(=O)OCc1ccccc1	6.45762	1	0.3179	0.6821	FN	0.0201	YES
-	48	CC(=O)Oc1ccccc1C(=O)O	2.24844	0	0.1429	-0.1429	TN	0.0168	YES
+	1306	COc1ccc2c(c1)c(C1=C(c3c[nH]c4ccccc34)C(=O)NC1=O)cn2CCCN(C)C	9.90128	1	0.461	0.539	FN	0.0576	YES
*	455	COc1cc2nc(N3CCN(C(=O)c4ccco4)CC3)nc(N)c2cc1OC	-0.43531	0	0.0314	-0.0314	TN	1.0571	No
+	1332	CC(C)(C)CC(C)(C)c1ccc(O)cc1	3.12525	1	0.1794	0.8206	FN	0.0078	YES
#	1443	NC(=O)c1cn(Cc2c(F)cccc2F)nn1	8.18066	0	0.3895	-0.3895	TN	0.0277	YES
-	1349	O[n+]1ccccc1SSc1cccc[n+]1O	13.5038	1	0.6107	0.3893	TP	0.013	YES
-	36	Nc1ccncc1	7.24657	0	0.3507	-0.3507	TN	0.0049	YES
#	1360	COc1ccc(CN2CCN(C(c3ccc(F)cc3)c3ccc(F)cc3)CC2)c(OC)c1OC	13.9625	1	0.6298	0.3702	TP	0.0485	YES
-	3328	Cc1c(F)cc(C(=O)NC2CC2)cc1-c1ccc(C(=O)NCC(C)(C)C)cn1	6.30566	0	0.3116	-0.3116	TN	0.0396	YES
*	1372	CNCCC(Oc1cccc2ccccc12)c1cccs1	18.3899	1	0.8138	0.1862	TP	2.0236	No
-	3546	CSCCNc1nc(SCCC(F)(F)F)nc2c1ncn2C1OC(COP(=O)(O)OP(=O)(O)C(Cl)(Cl)P(=O)(O)O)C(O)C1O	-6.8924	0	-0.237	0.237	TN	2.1637	No
+	1381	Cc1cccc(C)c1OCC(=O)NC(Cc1ccccc1)C(O)CC(Cc1ccccc1)NC(=O)C(C(C)C)N1CCCNC1=O	16.0361	1	0.716	0.284	TP	0.0387	YES
*	876	CC(=O)OCC(COC(C)=O)OC(C)=O	-5.70196	0	-0.1875	0.1875	TN	0.0168	YES
+	1421	CCOC(=O)C(CCc1ccccc1)NC1CCc2ccccc2N(CC(=O)O)C1=O	12.1163	1	0.553	0.447	TP	0.0319	YES
#	3441	CC1(C)CCC2(C(=O)O)CCC3(C)C(=CCC4C5(C)CC(O)C(O)C(C)(C)C5CCC43C)C2C1	-3.28516	0	-0.087	0.087	TN	0.0757	YES
*	1425	NC(=O)c1ccc2nc(-c3ccc(Oc4ccc(Cl)cc4)cc3)[nH]c2c1	13.1389	1	0.5955	0.4045	TP	0.0503	YES
*	1059	Nc1ncnc2c1nc(Cl)n2C1OC(CO)C(O)C1O	3.00947	0	0.1746	-0.1746	TN	1.0354	No
#	1442	COc1cccc2c1CCCC2CCCN1CCN(C2CCCCC2)CC1	18.3062	1	0.8103	0.1897	TP	0.0325	YES
+	125	CCc1cccc2c3c([nH]c12)C(CC)(CC(=O)O)OCC3	-0.18542	0	0.0418	-0.0418	TN	1.0238	No
#	1445	Fc1ccc(Cl)cc1-c1nc(Nc2ccncc2)c2nccnc2n1	16.8496	1	0.7498	0.2502	TP	0.0437	YES
*	932	NC(=O)C1N=CN(C2OC(CO)C(O)C2O)C1=O	2.71699	0	0.1624	-0.1624	TN	2.0332	No
#	1446	Cc1[nH]c(C=C2C(=O)Nc3ccc(S(=O)(=O)N(C)c4cccc(Cl)c4)cc32)c(C)c1C(=O)N1CCN(C)CC1	19.9768	1	0.8797	0.1203	TP	0.0737	YES
*	1191	CC(=O)Nc1ccc(CC(=O)O)cc1	1.46246	0	0.1103	-0.1103	TN	0.0132	YES
+	1452	CCOC(=O)C1C(=COCCN)NC(C)=C(C(=O)OC)C1c1ccccc1Cl	12.9937	1	0.5895	0.4105	TP	1.0359	No
-	746	CCN1C(=CC(C)=O)Sc2ccc(OC)cc21	2.29006	0	0.1447	-0.1447	TN	0.0213	YES
-	1502	O=[N+]([O-])c1cc(I)c(O)c(I)c1	11.5188	1	0.5282	0.4718	TP	0.0096	YES
-	1210	CCOc1cc(N)c(Cl)cc1C(=O)NCC1CN(Cc2ccc(F)cc2)CCO1	9.03333	0	0.4249	-0.4249	TN	0.0309	YES
+	1531	CCOC(=O)C1OC1C(=O)NC(CC(C)C)C(=O)NCCC(C)C	1.74949	1	0.1222	0.8778	FN	0.0192	YES
+	2738	O=C(O)CCCCC(CCSCc1ccccc1)SCc1ccccc1	8.24271	0	0.3921	-0.3921	TN	2.0385	No
*	1558	C#CC1(O)CCC2C3CCC4=CCCCC4C3C(=C)CC21CC	16.7339	1	0.745	0.255	TP	1.0557	No
#	3495	CCC(C)C1NC(=O)C(Cc2ccc(O)cc2)NC(=O)C(N)CSSCC(C(=O)N2CCCC2C(=O)NC(CC(C)C)C(=O)NCC(N)=O)NC(=O)C(CC(N)=O)NC(=O)C(CCC(N)=O)NC1=O	7.69883	0	0.3695	-0.3695	TN	0.0979	YES
+	1570	C=C1C(=CC=C2CCCC3(C)C2CCC3C(C)C=CC(O)C2CC2)CC(O)CC1O	13.0291	1	0.591	0.409	TP	0.0467	YES
+	188	CCCN(CCC)C(=O)C(CCC(=O)O)NC(=O)c1ccccc1	3.06382	0	0.1768	-0.1768	TN	0.0188	YES
*	1585	CNC(=O)c1cc(Oc2ccc(NC(=O)Nc3ccc(Cl)c(C(F)(F)F)c3)cc2)ccn1	10.6605	1	0.4925	0.5075	FN	0.0514	YES
-	1917	Clc1cc(Cl)c(OCC#CI)cc1Cl	6.67496	0	0.3269	-0.3269	TN	0.0209	YES
+	1586	COc1cccc(CCc2ccccc2OCC(CN(C)C)OC(=O)CCC(=O)O)c1	11.1029	1	0.5109	0.4891	TP	0.0292	YES
*	2459	CCC(=O)OC1CC(=O)OC(C)CC=CC=CC(O)C(C)CC(CC=O)C(OC2OC(C)C(OC3CC(C)(O)C(OC(=O)CC)C(C)O3)C(N(C)C)C2O)C1OC	2.03444	0	0.134	-0.134	TN	1.0621	No
*	1589	COC(=O)C1=C(C)NC(C)=C(C(=O)OC(C)(C)CN(C)CCC(c2ccccc2)c2ccccc2)C1c1cccc([N+](=O)[O-])c1	17.9333	1	0.7948	0.2052	TP	0.0392	YES
#	2555	Cn1cc(-c2ccc3nnc(C(F)(F)c4ccc5ncccc5c4)n3n2)cn1	6.70025	0	0.328	-0.328	TN	0.1055	YES
#	1590	COC(=O)C1=C(C)NC(C)=C(C(=O)OCCN2CCN(C(c3ccccc3)c3ccccc3)CC2)C1c1cccc([N+](=O)[O-])c1	17.0827	1	0.7594	0.2406	TP	0.0602	YES
#	1960	CCOC(=O)C(CCc1ccccc1)NC(C)C(=O)N(CC(=O)O)C1Cc2ccccc2C1	9.86517	0	0.4595	-0.4595	TN	0.031	YES
#	1598	CS(=O)(=O)CCNCc1ccc(-c2ccc3ncnc(Nc4ccc(OCc5cccc(F)c5)c(Cl)c4)c3c2)o1	19.6096	1	0.8645	0.1355	TP	0.1179	YES
+	3842	NS(=O)(=O)c1ccc(-n2nc(C(F)(F)F)cc2-c2ccc(F)cc2)cc1	8.30151	0	0.3945	-0.3945	TN	0.0535	YES
*	1638	CCN(CC)CCCN(c1ccccc1)C1Cc2ccccc2C1	16.1885	1	0.7223	0.2777	TP	0.0176	YES
-	1546	CC1=C(C(=O)OC(C)C)C(c2cccc([N+](=O)[O-])c2)C(C(=O)OC2CN(C(c3ccccc3)c3ccccc3)C2)=C(N)N1	8.68493	0	0.4104	-0.4104	TN	0.0617	YES
*	1642	CC(C)c1onc(-c2c(Cl)cccc2Cl)c1COc1ccc(C=Cc2cccc(C(=O)O)c2)c(Cl)c1	17.9738	1	0.7965	0.2035	TP	0.0529	YES
#	555	COc1ccc(C=CC(=O)Nc2ccccc2C(=O)O)cc1OC	3.42835	0	0.192	-0.192	TN	0.0291	YES
+	1646	COc1cc(C(C)C)c2c(c1)S(=O)(=O)N(COc1cc(=O)n3cccc(OCCN4CCCCC4)c3n1)C2=O	15.0066	1	0.6732	0.3268	TP	2.0791	No
+	1224	C(=Cc1ccncc1)c1ccccc1	9.54285	0	0.4461	-0.4461	TN	0.013	YES
*	1647	O=C(c1ccc(Nc2nccc(-c3cc4ccccc4s3)n2)cc1)N1CCC(N2CCCC2)CC1	29.8399	1	1.2896	-0.2896	TP	1.0607	No
-	2882	COc1ccc(-c2oc3c(CC=C(C)C)c(OC4OC(CO)C(O)C(O)C4O)cc(O)c3c(=O)c2OC2OC(C)C(O)C(O)C2O)cc1	-0.1704	0	0.0424	-0.0424	TN	3.0822	No
*	1682	N#CC(c1ccc(Cl)cc1)c1c(Cl)cc(-n2ncc(=O)[nH]c2=O)cc1Cl	21.3083	1	0.9351	0.0649	TP	2.0511	No
+	2453	Cn1c(=O)c(Oc2ccc(F)cc2F)cc2cnc(NC3CCOCC3)nc21	5.37903	0	0.273	-0.273	TN	0.0506	YES
-	1691	CN1CCCC(n2nc(Cc3ccc(Cl)cc3)c3ccccc3c2=O)CC1	16.5972	1	0.7393	0.2607	TP	2.0368	No
*	3093	Nc1ncnc2c1C(=O)N(c1ccc(C3CCC(CC(=O)O)CC3)cc1)CCO2	5.23059	0	0.2669	-0.2669	TN	0.0468	YES
-	1699	Clc1ccc(C(OCCN2CCCCC2)c2ccccc2)cc1	17.7417	1	0.7868	0.2132	TP	0.0238	YES
*	415	CC(N)C(O)c1ccc(O)c(O)c1	1.57779	0	0.1151	-0.1151	TN	0.0085	YES
+	1704	CCN(CC)CCOC(=O)C(Cc1cccc2ccccc12)CC1CCCO1	11.06	1	0.5091	0.4909	TP	1.0216	No
+	2292	COC(=O)Nc1nc2ccc(C(=O)c3ccc(F)cc3)cc2[nH]1	2.07418	0	0.1357	-0.1357	TN	0.0304	YES
+	1726	CN(Cc1cc(Br)cc(Br)c1N)C1CCCCC1	16.5176	1	0.736	0.264	TP	0.0454	YES
#	2341	O=C1NC(c2ccccc2)(c2ccccc2)C(=O)N1COP(=O)(O)O	9.13613	0	0.4292	-0.4292	TN	0.0508	YES
*	1738	CC(CN(C)C)CN1c2ccccc2Sc2ccccc21	19.8649	1	0.8751	0.1249	TP	0.0271	YES
#	3635	CCc1ccc(Cc2ccc3c(c2)C2(OC3)OC(CO)C(O)C(O)C2O)cc1	4.04539	0	0.2176	-0.2176	TN	0.036	YES
*	1754	CCN(CC)C(C)CN1c2ccccc2Sc2ccccc21	18.2936	1	0.8098	0.1902	TP	0.0278	YES
#	3284	CC(=O)OC(C)(C)CCC(=O)C(C)(O)C1C(O)CC2(C)C3CC=C4C(CC(O)C(O)C4(C)C)C3(C)C(=O)CC12C	-8.15873	0	-0.2896	0.2896	TN	0.0765	YES
#	1798	COc1ccc2c(c1)N(CC(C)CN(C)C)c1ccccc1S2	21.2208	1	0.9314	0.0686	TP	0.024	YES
#	31	CC(C)(O)C=CC(=O)C(C)(O)C1C(O)CC2(C)C3CC=C4C(C=C(O)C(=O)C4(C)C)C3(C)C(=O)CC12C	-6.5548	0	-0.2229	0.2229	TN	0.0782	YES
*	1800	CN1CCN(C(c2ccccc2)c2ccc(Cl)cc2)CC1	12.7602	1	0.5798	0.4202	TP	0.0152	YES
*	2513	COc1ccc(CCN2CCN(CCCc3ccccc3)CC2)cc1OC	8.32745	0	0.3956	-0.3956	TN	0.0346	YES
*	1830	CC1CC2C3CCC4=CC(=O)C=CC4(C)C3(Cl)C(O)CC2(C)C1(OC(=O)c1ccco1)C(=O)CCl	22.8557	1	0.9994	0.0006	TP	2.076	No
-	552	C[N+]12CCC(CC1)C(OC(=O)C(O)(c1ccccc1)c1ccccc1)C2	11.6221	0	0.5325	-0.5325	FP	0.0325	YES
*	1846	CN1CCN(CCCN2c3ccccc3Sc3ccc(S(=O)(=O)N(C)C)cc32)CC1	20.9366	1	0.9196	0.0804	TP	0.0436	YES
#	529	CNC1C(O)C(NC)C2OC3(O)C(=O)CC(C)OC3OC2C1O	2.95925	0	0.1725	-0.1725	TN	0.0324	YES
*	1854	C#CC1(O)CCC2C3CCC4=Cc5oncc5CC4(C)C3CCC21C	29.9266	1	1.2932	-0.2932	TP	0.0825	YES
-	1768	CCCNC(C)C(=O)Nc1c(C)csc1C(=O)OC	2.81835	0	0.1666	-0.1666	TN	0.0266	YES
+	1857	C#CC1(O)CCC2C3CCC4=CCCCC4C3CCC21C	20.2716	1	0.892	0.108	TP	1.0516	No
#	3075	O=C(O)CC(C(=O)O)N1C(=O)C(=C2C(=O)Nc3ccc(Br)cc32)SC1=S	3.20825	0	0.1828	-0.1828	TN	0.0693	YES
*	1864	CCC1CN2CCC1CC2C(O)c1ccnc2ccc(OC)cc12	15.3212	1	0.6862	0.3138	TP	0.0298	YES
+	2650	C=C1CC2C(CCC3(C)C(=O)CCC23)C2(C)C=CC(=O)C=C12	7.28915	0	0.3524	-0.3524	TN	1.0425	No
-	1898	CN(C)CCC=C1c2ccccc2C(C)(C)c2ccccc21	13.7172	1	0.6196	0.3804	TP	0.0188	YES
-	3906	Cc1c(Cl)cccc1S(=O)(=O)Nc1nc(CCN2CCOCC2=O)cs1	6.79742	0	0.332	-0.332	TN	2.0487	No
*	1904	Cc1cc(O)c2c(c1)OC1(C)CCC3C(C)(C)CCCC34COC2C14	12.9855	1	0.5892	0.4108	TP	0.0361	YES
*	1074	CCCCC(CC)COC(=O)c1ccccc1O	3.46427	0	0.1935	-0.1935	TN	0.0122	YES
*	1907	CCCOC(C(=O)OC1CCN(C)CC1)(c1ccccc1)c1ccccc1	14.273	1	0.6427	0.3573	TP	0.0254	YES
*	8	Cc1ncc(COP(=O)(O)O)c(C)c1O	1.35514	0	0.1058	-0.1058	TN	0.0372	YES
*	1930	CC(CN(C)C)CN1c2ccccc2Sc2ccc(C(F)(F)F)cc21	22.4782	1	0.9837	0.0163	TP	0.0413	YES
-	3437	N#Cc1ccc(C2CCCc3cncn32)cc1	11.7045	0	0.5359	-0.5359	FP	0.0381	YES
*	1983	CC(C(O)c1ccccc1)N(C)CCOC(c1ccccc1)c1ccccc1	17.159	1	0.7626	0.2374	TP	0.0191	YES
#	542	CC(O)Cn1cnc2c1c(=O)n(C)c(=O)n2C	-7.03504	0	-0.2429	0.2429	TN	0.038	YES
+	2007	Cc1c(-c2ccc(O)cc2)n(Cc2ccc(OCCN3CCCCCC3)cc2)c2ccc(O)cc12	17.1779	1	0.7634	0.2366	TP	0.0455	YES
-	1574	COc1cc2c(cc1OC)C(Cc1cc(OC)c(OC)c(OC)c1)[N+](C)(CCCOC(=O)CCC=CCCC(=O)OCCC[N+]1(C)CCc3cc(OC)c(OC)cc3C1Cc1cc(OC)c(OC)c(OC)c1)CC2	3.80219	0	0.2075	-0.2075	TN	0.0734	YES
#	2022	CN(C)CCOC1=Cc2ccccc2Sc2ccc(Cl)cc21	20.8658	1	0.9167	0.0833	TP	0.031	YES
#	1676	CC(C)CN(CC(OP(=O)(O)O)C(Cc1ccccc1)NC(=O)OC1CCOC1)S(=O)(=O)c1ccc(N)cc1	6.65399	0	0.326	-0.326	TN	0.0597	YES
-	2024	Cn1nnnc1Sc1ncnc2scc(-c3cccc(S(C)(=O)=O)c3)c12	10.8091	1	0.4987	0.5013	FN	1.0764	No
+	2553	CN1CCC(CNc2ccc3ncc(-c4cccc(OC(F)(F)F)c4)n3n2)CC1	8.72228	0	0.412	-0.412	TN	0.0622	YES
-	2041	CC1CC2C3CCC4=CC(=O)C=CC4(C)C3C(=O)CC2(C)C1(O)C(=O)CO	9.59139	1	0.4481	0.5519	FN	0.0609	YES
-	112	CC(CCc1ccc(O)cc1)NCCc1ccc(O)c(O)c1	10.3473	0	0.4795	-0.4795	TN	0.0132	YES
*	2074	O=C(CCC1CCN(Cc2ccccc2)CC1)c1ccc2c(c1)NCCCC2	15.5195	1	0.6945	0.3055	TP	0.0233	YES
*	1810	CC(=O)C1CCC2C3CC(C)C4=CC(=O)CCC4(C)C3C(O)CC12C	5.76585	0	0.2891	-0.2891	TN	0.0578	YES
*	2086	CCCN(CCC)C(=O)C(CCC(=O)OCCCN1CCN(CCOC(=O)Cc2c(C)n(C(=O)c3ccc(Cl)cc3)c3ccc(OC)cc23)CC1)NC(=O)c1ccccc1	13.1499	1	0.596	0.404	TP	0.0688	YES
+	3203	C=C1C(=CC=C2CCCC3(C)C2CCC3C(C)CCCC(O)(C(F)(F)F)C(F)(F)F)CC(O)CC1O	9.91642	0	0.4616	-0.4616	TN	0.0683	YES
+	2124	COc1cc(O)c2c(c1)C1OC1CC(O)C(O)C(=O)C=CCC(C)OC2=O	8.63492	1	0.4084	0.5916	FN	1.0325	No
-	2753	Cc1nc(Nc2[nH]nc3c2CN(C(=O)NC(CN(C)C)c2ccccc2)C3(C)C)c2sccc2n1	13.0651	0	0.5925	-0.5925	FP	1.0539	No
+	2127	CN(C)CCCNC(=O)c1ccc(-c2cc(O)c3ncccc3c2)cc1	10.406	1	0.482	0.518	FN	0.0233	YES
#	1527	O=S(=O)(O)CC(S)CS	-2.33853	0	-0.0477	0.0477	TN	0.0269	YES
-	2129	COC(=O)C1=C(C)NC(COC(N)=O)=C(C(=O)OC(C)C)C1c1cccc(Cl)c1Cl	10.811	1	0.4988	0.5012	FN	0.0377	YES
-	987	S=P(N1CC1)(N1CC1)N1CC1	15.3589	0	0.6878	-0.6878	FP	0.0234	YES
*	2134	O=C(CCCN1CCN(c2ccc(F)cc2)CC1)NC1c2ccccc2CSc2ccccc21	16.4034	1	0.7312	0.2688	TP	0.0376	YES
#	3500	NS(=O)(=O)NCCNc1nonc1C(=Nc1ccc(F)c(Br)c1)NO	-1.14182	0	0.002	-0.002	TN	0.0599	YES
#	2145	CCN1CCN(c2cc(-c3ccc(F)cc3)c3c(n2)CCCCCC3)CC1	13.3581	1	0.6047	0.3953	TP	0.0401	YES
+	528	Oc1ccc(C=Cc2cc(O)cc(O)c2)cc1	7.82127	0	0.3745	-0.3745	TN	0.0159	YES
#	2181	COC1C(OC(C)=O)CC(=O)OC(C)CC=CC=CC(OC2CCC(N(C)C)C(C)O2)C(C)CC(CC=O)C1OC1OC(C)C(OC2CC(C)(O)C(O)C(C)O2)C(N(C)C)C1O	22.0038	1	0.964	0.036	TP	0.067	YES
+	3400	Cn1ncc(Cl)c1-c1cc(C(=O)NC(CN)Cc2cccc(F)c2)sc1Cl	6.53529	0	0.3211	-0.3211	TN	0.0529	YES
-	2190	CCc1ccc(C=C2SC(=S)NC2=O)cc1	19.5316	1	0.8612	0.1388	TP	2.0336	No
+	1223	CCCCCCCCCCCCCCCCCC(=O)O[Al](O)O	3.61736	0	0.1998	-0.1998	TN	1.0176	No
+	2210	COc1cc(F)c(F)c(Nc2ccc(I)cc2F)c1NS(=O)(=O)C1(CC(O)CO)CC1	17.7428	1	0.7869	0.2131	TP	1.0418	No
-	3646	Cc1ccc(-c2ccc3c(c2)C=C(C(=O)Nc2ccc(C[N+](C)(C)C4CCOCC4)cc2)CCC3)cc1	13.0999	0	0.5939	-0.5939	FP	0.0661	YES
#	2223	COc1cc(C(C)=O)ccc1OCCCN1CCC(c2noc3cc(F)ccc23)CC1	22.5297	1	0.9858	0.0142	TP	0.0458	YES
#	3134	NC(=O)c1nc(F)c[nH]c1=O	-0.4628	0	0.0303	-0.0303	TN	0.0159	YES
*	2224	Cc1ccc(Nc2nccc(N(C)c3ccc4c(C)n(C)nc4c3)n2)cc1S(N)(=O)=O	16.049	1	0.7165	0.2835	TP	1.0658	No
#	3575	COC1C(O)C(O)C(O)C(O)C1O	-1.91732	0	-0.0302	0.0302	TN	0.0093	YES
+	2236	O=C(Nc1ccc(F)c(C(F)(F)F)c1)Nc1nnc(-c2ccncc2)s1	23.519	1	1.0269	-0.0269	TP	0.0456	YES
*	1733	CC(C(O)c1ccccc1)N(C)C	5.35932	0	0.2722	-0.2722	TN	0.0076	YES
*	2238	COc1cc(C)c(Sc2cnc(NC(=O)c3ccc(CNC(C)C(C)(C)C)cc3)s2)cc1C(=O)N1CCN(C(C)=O)CC1	9.22172	1	0.4327	0.5673	FN	2.0545	No
-	3664	O=C(O)CNC(=O)c1c(O)n(C2CCCCC2)c(=O)n(C2CCCCC2)c1=O	-2.75391	0	-0.065	0.065	TN	0.0485	YES
*	2242	Cn1cc(C2=C(c3cn(C4CCN(Cc5ccccn5)CC4)c4ccccc34)C(=O)NC2=O)c2ccccc21	29.6425	1	1.2814	-0.2814	TP	1.1316	No
+	2550	OCCn1cc(-c2ccc3c(c2)CCC3=NO)c(-c2ccncc2)n1	9.73948	0	0.4543	-0.4543	TN	5.0406	No
#	2247	Cc1ccc(NC(=O)c2ccc(CN3CCN(C)CC3)cc2)cc1Nc1nc(-c2cccnc2)cs1	18.8451	1	0.8327	0.1673	TP	0.053	YES
#	2354	NS(=O)(=O)c1ccc(N2CCCCS2(=O)=O)cc1	-0.90823	0	0.0117	-0.0117	TN	0.0395	YES
*	2251	OCCC#Cc1nc(-c2ccc(F)cc2)c(-c2ccncc2)n1CCCc1ccccc1	21.1566	1	0.9288	0.0712	TP	0.0397	YES
+	2037	CC1(C)OCC(COC(=O)CCc2ccc(OCC(O)CNCCNC(=O)N3CCOCC3)cc2)O1	12.0223	0	0.5491	-0.5491	FP	0.0459	YES
+	2270	CCN(CC)CCOc1ccc(Nc2ncc3cc(-c4c(Cl)cccc4Cl)c(=O)n(C)c3n2)cc1	9.40844	1	0.4405	0.5595	FN	3.0615	No
-	2008	C=C1CC(=CC=C2CCCC3(C)C2CCC3C(C)C=CC(C)C(C)C)C(O)CC1O	13.738	0	0.6204	-0.6204	FP	0.0374	YES
#	2273	CC(C)(C)c1cc(NC(=O)Nc2ccc(-c3cn4c(n3)sc3cc(OCCN5CCOCC5)ccc34)cc2)no1	28.8712	1	1.2494	-0.2494	TP	0.0862	YES
+	2162	Nc1[nH]nc2nnc(-c3c(-c4ccccc4)nn4ccccc34)cc12	2.55627	0	0.1557	-0.1557	TN	0.0672	YES
-	2279	CC(=O)OCC(=O)C1(O)C(C)CC2C3C=C(C)C4=Cc5c(cnn5-c5ccccc5)CC4(C)C3C(O)CC21C	34.8445	1	1.4976	-0.4976	TP	0.1445	YES
-	82	O=C1CCc2cc(OCCCCc3nnnn3C3CCCCC3)ccc2N1	4.01097	0	0.2162	-0.2162	TN	0.0361	YES
*	2289	CCOC(=O)c1c(CSc2ccccc2)n(C)c2cc(Br)c(O)c(CN(C)C)c12	8.01506	1	0.3826	0.6174	FN	0.0581	YES
*	3349	CC1COC2Cn3cc(C(=O)NCc4ccc(F)cc4F)c(=O)c(O)c3C(=O)N12	-1.11859	0	0.003	-0.003	TN	0.0501	YES
-	2298	COc1ccc2cc1Oc1ccc(cc1)CC1c3cc(c(OC)cc3CCN1C)Oc1c(O)c(OC)cc3c1C(C2)N(C)CC3	25.2355	1	1.0983	-0.0983	TP	0.0605	YES
*	782	CC12C=CC(=O)C=C1CCC1C2C(=O)CC2(C)C1CCC2(O)C(=O)CO	4.65274	0	0.2429	-0.2429	TN	0.0389	YES
-	2300	CC(=O)ON=C1C(=O)N(Cc2cc(Cl)ccc2Cl)c2ccc(Cl)cc21	12.9559	1	0.5879	0.4121	TP	2.041	No
+	1044	CCCCCCCCCCCCCCCCCCOCC(O)CO	8.34365	0	0.3963	-0.3963	TN	0.0175	YES
+	2304	COc1c(C)cnc(Cn2cnc3c(Cl)nc(N)nc32)c1C	13.6601	1	0.6172	0.3828	TP	2.0478	No
-	3480	C=C1CCN(C(C)C(O)(Cn2cncn2)c2ccc(F)cc2F)CC1	9.53831	0	0.4459	-0.4459	TN	1.0418	No
#	2305	CCNC(=O)c1noc(-c2cc(C(C)C)c(O)cc2O)c1-c1ccc(CN2CCOCC2)cc1	20.5888	1	0.9052	0.0948	TP	0.0577	YES
-	3611	CC1(O)C(O)C(CO)OC1n1ccc(N)nc1=O	10.4261	0	0.4828	-0.4828	TN	0.0262	YES
*	2307	O=C(NC(c1ccccc1)C1CCCCN1)c1cccc(C(F)(F)F)c1Cl	20.4545	1	0.8996	0.1004	TP	0.0366	YES
#	603	N=C(N)Nc1nc(CSCCC(N)=NS(N)(=O)=O)cs1	1.26499	0	0.1021	-0.1021	TN	0.065	YES
+	2321	Cc1ccc(C(=O)Nc2cccc(C(F)(F)F)c2)cc1Nc1nc(-c2cccnc2)nc2c1cnn2C	16.9338	1	0.7533	0.2467	TP	0.0555	YES
-	1625	CC(C)(C)CC(C)(C)c1cc(Cc2cc(C(C)(C)CC(C)(C)C)cc(-n3nc4ccccc4n3)c2O)c(O)c(-n2nc3ccccc3n2)c1	5.2368	0	0.2671	-0.2671	TN	1.088	No
*	2326	O=C(Nc1ccc(S(=O)(=O)N2CCOCC2)cc1)c1cc(Cl)ccc1NS(=O)(=O)c1ccc(Cl)s1	22.771	1	0.9959	0.0041	TP	2.0571	No
#	646	CC1(C)SC2C(NC(=O)C(N)c3ccccc3)C(=O)N2C1C(=O)O	0.49101	0	0.0699	-0.0699	TN	0.0481	YES
#	2338	CN(C)CCOC(c1ccccc1)c1ccc(Br)cc1	15.1937	1	0.6809	0.3191	TP	0.0299	YES
*	3197	Cc1cc(N2CCN(C3CNC(C(=O)N4CCSC4)C3)CC2)n(-c2ccccc2)n1	4.41218	0	0.2329	-0.2329	TN	0.0776	YES
+	2361	CN(C)CCCOC1(Cc2ccccc2)CCCCCC1	13.8496	1	0.6251	0.3749	TP	0.0168	YES
#	1695	CCCCC(=O)N(Cc1ccc(-c2ccccc2-c2nn[nH]n2)cc1)C(C(=O)O)C(C)C	8.09999	0	0.3861	-0.3861	TN	0.0384	YES
+	2392	CN1CCN(c2cc(C(=O)Nc3ccc4c(c3)-c3c(c(C(N)=O)nn3-c3ccc(F)cc3)CC4)c(Cl)cn2)CC1	16.0199	1	0.7153	0.2847	TP	2.0861	No
-	238	CN1C(C(=O)Nc2ccccn2)=C(O)c2ccccc2S1(=O)=O	9.5475	0	0.4463	-0.4463	TN	0.0383	YES
+	2394	Cc1c(CCOc2ccc(C(=O)O)cc2)c2cc(Cl)ccc2n1C(c1ccccc1)c1ccccc1	22.6406	1	0.9904	0.0096	TP	0.0391	YES
*	3037	CC(C)n1cnc2c(NCCCCCCNC(=O)OC(C)(C)C)nc(NCCO)nc21	-1.39728	0	-0.0086	0.0086	TN	0.035	YES
-	2401	Cc1ccc(F)c(NC(=O)Nc2ccc(-c3cccc4n[nH]c(N)c34)cc2)c1	15.6785	1	0.7011	0.2989	TP	0.0458	YES
-	2015	C=C1CC2C3CCC4=CC(=O)C=CC4(C)C3(F)C(O)CC2(C)C1(O)C(=O)COC(C)=O	11.101	0	0.5108	-0.5108	FP	0.0688	YES
*	2403	Cn1c(Nc2ccc(C(F)(F)F)cc2)nc2cc(Oc3ccnc(-c4ncc(C(F)(F)F)[nH]4)c3)ccc21	24.7776	1	1.0793	-0.0793	TP	0.0946	YES
*	915	COC1(NC(=O)Cc2cccs2)C(=O)N2C(C(=O)O)=C(COC(N)=O)CSC21	10.2886	0	0.4771	-0.4771	TN	2.0667	No
#	2405	O=C(O)c1ccc(-c2c[nH]c3ncc(-c4ccccc4)cc23)cc1C1CCCC1	21.5686	1	0.9459	0.0541	TP	0.0525	YES
-	3021	c1ccc(CNc2nc(NCc3ccccc3)c3ccccc3n2)cc1	4.09946	0	0.2199	-0.2199	TN	0.0361	YES
+	2415	CC1CCCCN1CCCOC(=O)c1ccc(OC2CCCCC2)cc1	19.5445	1	0.8618	0.1382	TP	0.0252	YES
*	3136	CC(=O)OC1(C(C)=O)CCC2C3CC(C)C4=CC(=O)C=CC4(C)C3(F)C(O)CC21C	8.50929	0	0.4031	-0.4031	TN	0.0718	YES
+	2436	CN(C)C(CCOc1cccc2ccccc12)c1ccccc1	19.7086	1	0.8686	0.1314	TP	1.0187	No
+	3124	O=c1[nH]c(N2CCOCC2)cn1-c1ccc(Cl)cc1	9.43867	0	0.4418	-0.4418	TN	1.0387	No
*	2441	Cc1cccc(Nc2nc(NC3CCCCC3N)ncc2C(N)=O)c1	17.9095	1	0.7938	0.2062	TP	0.0379	YES
-	2957	CC1(c2cc(-c3cncnc3)c(F)cc2F)CCSC(N)=N1	9.66093	0	0.451	-0.451	TN	1.0631	No
#	2475	CCC(CN)=C(c1ccccc1)c1ccccc1	14.6252	1	0.6573	0.3427	TP	0.0126	YES
*	825	COC(=O)C(Cc1ccccc1)NC(=O)C(N)CC(=O)O	-1.57609	0	-0.016	0.016	TN	0.0193	YES
+	2483	Cc1nn(Cc2ccccc2Cl)c(C)c1CN(C)CC(O)COc1ccc(Cl)cc1	11.133	1	0.5122	0.4878	TP	0.0424	YES
+	3932	CN(Cc1ccccc1)C(=O)C(NC(=O)c1cc2cc(NC(=O)c3ccccc3-c3ccc(C(F)(F)F)cc3)ccc2n1C)c1ccccc1	25.7378	0	1.1192	-1.1192	FP	0.0648	YES
-	2485	COc1cc2nc(-c3ccc(N4CCN(C)CC4)cc3)nc(NCCN3CCOCC3)c2cc1OC	20.8467	1	0.9159	0.0841	TP	0.0724	YES
-	3188	CN(C)N(C)C(=O)C1(Cc2ccccc2)CCCN(C(=O)C(Cc2c[nH]c3ccccc23)NC(=O)C(C)(C)N)C1	17.0723	0	0.759	-0.759	FP	1.0401	No
-	2495	Cc1cccc(C=NNc2cc(N3CCOCC3)nc(OCCc3ccccn3)n2)c1	24.1992	1	1.0552	-0.0552	TP	0.052	YES
-	3552	CCC1C(O)C2C3CCC(C(C)CCC(=O)O)C3(C)CCC2C2(C)CCC(O)CC12	0.04237	0	0.0512	-0.0512	TN	0.0386	YES
#	2496	Cc1csc(-c2nnc(Nc3ccc(Oc4ncccc4-c4ccnc(N)n4)cc3)c3ccccc23)c1	21.6013	1	0.9472	0.0528	TP	0.0947	YES
-	3756	Cc1ccc(NC(=O)C2CCCN(C(=O)c3c(C)cccc3F)C2c2ccc(NC3CCCC3)cc2)cc1C(F)(F)F	3.50161	0	0.195	-0.195	TN	0.0579	YES
#	2508	CCCCCCCc1ccc(CCc2cccc(O)c2C(=O)O)cc1	11.7998	1	0.5399	0.4601	TP	0.0199	YES
*	730	COc1cc(N)c(Cl)cc1C(=O)NC1CCN(CCCOc2ccc(F)cc2)CC1OC	6.44761	0	0.3175	-0.3175	TN	0.0358	YES
*	2515	CCN(CC)CCCCNc1nc2cc(Cl)c(Cl)cc2nc1-c1ccc(-c2cccs2)s1	20.8509	1	0.9161	0.0839	TP	2.0551	No
+	639	CC(=O)OC1CC2CCC3C(CCC4(C)C3CC([N+]3(C)CCCCC3)C4OC(C)=O)C2(C)CC1[N+]1(C)CCCCC1	-4.46926	0	-0.1363	0.1363	TN	2.0701	No
#	2525	O=C(O)C(=O)c1cn(Cc2ccccc2)c2ccc(-c3ccc(OC(F)(F)F)cc3)cc12	13.5968	1	0.6146	0.3854	TP	0.0493	YES
#	183	Cc1oncc1C(=O)Nc1ccc(C(F)(F)F)cc1	12.2034	0	0.5567	-0.5567	FP	0.0322	YES
+	2531	Nc1nc(Nc2ccc(S(N)(=O)=O)cc2)nn1C(=O)c1c(F)cccc1F	15.093	1	0.6768	0.3232	TP	0.0437	YES
+	1398	CC(CCc1ccc(O)cc1)NCC(O)c1ccc(O)cc1	10.221	0	0.4743	-0.4743	TN	0.0125	YES
#	2535	S=C(NCc1ccc2c(c1)OCO2)N1CCN(c2ncnc3c2oc2ccccc23)CC1	12.9829	1	0.5891	0.4109	TP	0.0608	YES
+	3140	CNC(=O)c1ccccc1Nc1nc(Nc2ccc3c(c2OC)CCCC(N2CCN(CCO)CC2)C3)ncc1Cl	19.1878	0	0.8469	-0.8469	FP	0.061	YES
#	2545	c1ccc2c(CCNc3ccc(Nc4ccncc4)cc3)c[nH]c2c1	7.99444	1	0.3817	0.6183	FN	0.0437	YES
-	182	O=C(O)c1nn(Cc2ccc(Cl)cc2Cl)c2ccccc12	7.37666	0	0.3561	-0.3561	TN	0.0363	YES
#	2565	COc1ccc(C2CC(c3ccccc3)=NN2c2ccc(S(N)(=O)=O)cc2)cc1	21.7014	1	0.9514	0.0486	TP	0.0445	YES
-	3783	COc1cc(C)[nH]c(=O)c1CN1CCc2c(Cl)cc(C(OC)C3COC3)c(Cl)c2C1=O	6.81418	0	0.3327	-0.3327	TN	0.046	YES
*	2568	Cc1c(C(=O)Nc2cccc(C(F)(F)F)c2)cc(-c2ccccc2)n1CCCN1CCOCC1	17.78	1	0.7884	0.2116	TP	0.0461	YES
-	2609	CC1CC(=O)NN=C1c1ccc(NN=C(C#N)C#N)cc1	16.4505	0	0.7332	-0.7332	FP	0.0424	YES
*	2573	CCOC(CN1C(=O)C(CC(=O)Nc2ccc(C)cc2)(NC(=O)Nc2ccc(C)cc2)c2ccccc21)OCC	33.6454	1	1.4478	-0.4478	TP	0.0414	YES
*	2993	CC1(C)C(N(O)C(=O)Nc2ccc(Cl)cc2)N(c2ccc(Cl)cc2)C(=O)N1CC(=O)NN=CC=Cc1ccc([N+](=O)[O-])o1	14.9723	0	0.6717	-0.6717	FP	0.0662	YES
*	2578	CN(C)c1ccc(C2Nc3ccc4ccccc4c3C3=C2C(=O)CC(C)(C)C3)cc1Br	7.42531	1	0.3581	0.6419	FN	2.0569	No
*	1785	O=C(NCNC(=O)NC1C(=O)NC(=O)N1CO)NC1C(=O)NC(=O)N1CO	5.17102	0	0.2644	-0.2644	TN	0.0328	YES
*	2600	CN1CC2c3ccccc3Oc3ccc(Cl)cc3C2C1	9.48373	1	0.4436	0.5564	FN	0.0308	YES
*	1386	NCC1CCC(C(=O)Oc2ccc(CCC(=O)O)cc2)CC1	1.11274	0	0.0957	-0.0957	TN	0.024	YES
-	2621	CCCCCCCCCCCCCCCc1cccc(O)c1C(=O)O	13.3564	1	0.6046	0.3954	TP	0.0185	YES
*	457	CCn1cc(C(=O)O)c(=O)c2cnc(N3CCCC3)nc21	-0.91195	0	0.0116	-0.0116	TN	0.0416	YES
#	2651	CN1CCCC(CC2c3ccccc3Sc3ccccc32)C1	15.7689	1	0.7048	0.2952	TP	0.029	YES
#	1025	CCCCCNC(=N)N/N=C/c1c[nH]c2ccc(OC)cc12	6.09268	0	0.3027	-0.3027	TN	0.0269	YES
+	2691	Cc1cnc(NC(=O)Nc2cc(Br)c(C)cc2OCC2CNCCO2)cn1	14.7107	1	0.6609	0.3391	TP	0.0539	YES
+	389	COc1ccc2c(c1)[nH]c1c(C)nccc12	11.5575	0	0.5298	-0.5298	FP	0.0209	YES
-	2693	c1ccc2c(Oc3nc(Nc4ccc(N5CCOCC5)cc4)c4ncn(C5CCCCC5)c4n3)cccc2c1	29.0379	1	1.2563	-0.2563	TP	0.1155	YES
-	970	O=C(C=CC=Cc1ccc2c(c1)OCO2)N1CCCCC1	11.8483	0	0.5419	-0.5419	FP	0.0305	YES
*	2701	COc1cccc(C(C)NCCCc2ccccc2Cl)c1	14.4359	1	0.6494	0.3506	TP	0.0241	YES
*	383	Cc1nnc(NS(=O)(=O)c2ccc(N)cc2)s1	0.87749	0	0.086	-0.086	TN	0.0275	YES
+	2745	CC(C)C1C(=O)NC(CO)Cc2c[nH]c3cccc(c23)N1C	15.2488	1	0.6832	0.3168	TP	1.0234	No
+	2898	Cc1nc(NC(=O)N2CCCC2C(N)=O)sc1-c1csc(C(C)(C)C)n1	-6.56712	0	-0.2234	0.2234	TN	1.0614	No
-	2758	CN1CCC(COc2cnc(-c3cccc(Cn4nc(-c5cccc(C#N)c5)ccc4=O)c3)nc2)CC1	38.4612	1	1.6479	-0.6479	TP	0.1087	YES
*	803	O=C(O)C=CC(=O)O	-4.41929	0	-0.1342	0.1342	TN	0.0104	YES
*	2764	CC(C)CC(NC(=O)C(Cc1ccccc1)NC(=O)OCc1ccccc1)C(=O)C=O	7.26454	1	0.3514	0.6486	FN	0.0269	YES
#	3144	Cn1cc(-c2cnc3ccc4ccc(CS(=O)(=O)NCc5ccccn5)cc4c(=O)c3c2)cn1	6.17954	0	0.3063	-0.3063	TN	0.1082	YES
+	2765	O=C(NCc1ccccc1)C(Cc1ccccc1)NC(=O)C1OC1C(=O)NCCc1ccc(O)cc1	13.3694	1	0.6051	0.3949	TP	0.0267	YES
-	3577	CC1=CCC(=C(C)C)C(=O)CC(C)=CCC1	2.71769	0	0.1624	-0.1624	TN	0.016	YES
+	2770	COc1ccc(-c2oc3c(CC=C(C)C)c(O)cc(O)c3c(=O)c2O)cc1	13.2527	1	0.6003	0.3997	TP	0.0415	YES
-	3057	COc1nc2ccc(Br)cc2cc1C(c1ccccc1)C(O)(CCN(C)C)c1cccc2ccccc12	25.9674	0	1.1287	-1.1287	FP	0.0519	YES
-	2775	CC(C)(N)c1ccc(-c2nc3ccccc3nc2-c2ccccc2)cc1	15.3898	1	0.6891	0.3109	TP	0.0347	YES
*	3863	CCC1CCNC(C(=O)NC(C(C)Cl)C2OC(SC)C(O)C(O)C2O)C1	2.64628	0	0.1595	-0.1595	TN	0.0473	YES
#	2782	CCc1nc(-c2cccc(C)c2)c(-c2ccnc(NC(=O)c3ccccc3)c2)s1	20.9234	1	0.9191	0.0809	TP	0.0404	YES
+	300	O=C1c2c(O)cc(O)cc2OC(c2ccc(O)c(O)c2)C1O	2.33657	0	0.1466	-0.1466	TN	0.0225	YES
+	2783	O=C1NC(=O)C(=Cc2cccc(C(F)(F)F)c2)S1	10.3618	1	0.4801	0.5199	FN	1.0356	No
#	3436	Nc1nc(-n2cc(C(=O)O)c(=O)c3cc(F)c(N4CC(O)C4)c(Cl)c32)c(F)cc1F	6.70378	0	0.3281	-0.3281	TN	0.0764	YES
#	2789	COc1ccc2c(Oc3ccc(NC(=O)c4c(C)n(CC(C)(C)O)n(-c5ccccc5)c4=O)cc3F)ccnc2c1	7.12976	1	0.3458	0.6542	FN	0.1043	YES
*	3601	CC1OC(OC2CCC3(C)C(CCC4(C)C3C=CC3=C5CC(C)(C)CCC5(CO)C(O)CC34C)C2(C)CO)C(O)C(OC2OC(CO)C(O)C(O)C2O)C1O	3.75996	0	0.2058	-0.2058	TN	2.1017	No
-	2790	CN(C)CC(=O)N1CCC(c2ccc(NC(=O)c3ncc(C#N)[nH]3)c(C3=CCCCC3)c2)CC1	10.1099	1	0.4697	0.5303	FN	2.049	No
*	1890	Cn1sc(Cl)cc1=O	-5.82102	0	-0.1924	0.1924	TN	0.0229	YES
*	2803	NC(=O)c1cccc2cn(-c3ccc(C4CCCNC4)cc3)nc12	13.57	1	0.6135	0.3865	TP	0.0539	YES
+	902	CC(C)CC(N(C)C)C1(c2ccc(Cl)cc2)CCC1	7.34762	0	0.3549	-0.3549	TN	0.0143	YES
+	2822	CC(NC(=O)C(=O)Nc1ccccc1C(C)(C)C)C(=O)NC(CC(=O)O)C(=O)COc1c(F)c(F)cc(F)c1F	5.77023	1	0.2893	0.7107	FN	0.0414	YES
-	3450	COc1cccc2c1C(=O)c1c(O)c3c(c(O)c1C2=O)CC(O)(/C(CO)=N/NC(=O)CCCCCN1C(=O)C=CC1=O)CC3OC1CC(N)C(O)C(C)O1	-0.40746	0	0.0326	-0.0326	TN	4.07	No
#	2825	Cc1c(NC(=O)OCC2COCCN2)cn2ncnc(Nc3ccc4c(cnn4Cc4cccc(F)c4)c3)c12	15.4659	1	0.6923	0.3077	TP	0.0951	YES
*	2081	COc1cc(NS(=O)(=O)c2ccc(N)cc2)nc(C)n1	-6.33472	0	-0.2138	0.2138	TN	0.0287	YES
*	2842	Cc1ccc(NC(=O)c2ccc(CN3CCC(N(C)C)C3)c(C(F)(F)F)c2)cc1Nc1ncc(-c2cncnc2)cn1	20.213	1	0.8895	0.1105	TP	0.0721	YES
*	883	NCCNCCNCCN	3.65469	0	0.2014	-0.2014	TN	0.0045	YES
-	2849	CCC1C=CC=CCC(C)C(O)C(C)(O)C(=O)C(C)C(O)C(C)C(=O)C(C)C(O)C(C)C=CC(=O)OC2C(C)C(CC1)OC1(CCC(C)C(CC(C)O)O1)C2C	15.5959	1	0.6977	0.3023	TP	0.0582	YES
+	496	O=C(O)COC(=O)Cc1ccccc1Nc1c(Cl)cccc1Cl	7.18782	0	0.3482	-0.3482	TN	0.0262	YES
#	2853	CC(C)(C)Cn1c(N)nc2ccc(-c3nc(C(C)(C)C)[nH]c3-c3ccc(F)cc3)nc21	8.2593	1	0.3927	0.6073	FN	0.0534	YES
+	2539	CC(C)(C(=O)NCC(F)(F)C(F)(F)F)C(=O)NC1C(=O)Nc2ccccc2-c2ccccc21	3.74335	0	0.2051	-0.2051	TN	0.0584	YES
+	2856	COc1cc(Nc2nc3ccccc3nc2NS(=O)(=O)c2ccc(NC(=O)c3ccc(C)c(OC)c3)cc2)cc(OC)c1	17.1384	1	0.7618	0.2382	TP	1.0606	No
#	1780	CN(C)C1C(=O)C(C(=O)NCNC(CCCCN)C(=O)O)C(=O)C2(O)C(O)=C3C(=O)c4c(O)cccc4C(C)(O)C3CC12	-7.96702	0	-0.2816	0.2816	TN	0.0713	YES
*	2857	CNC(=O)c1ccc2c(c1)NC(=O)/C2=C(/Nc1cccc(CN(C)C)c1)c1ccccc1	18.5455	1	0.8202	0.1798	TP	4.0279	No
*	3142	CCCC(CCC)C(=O)Nc1ccn(C2OC(CO)C(O)C2(F)F)c(=O)n1	-1.65157	0	-0.0192	0.0192	TN	0.0403	YES
+	2861	CCCCCCCCCCCCc1ccc(S(=O)(=O)Nc2nncs2)cc1	20.6439	1	0.9075	0.0925	TP	2.0397	No
+	1186	CC(Cc1ccccc1)NCc1ccccc1Cl	4.12061	0	0.2207	-0.2207	TN	0.0152	YES
-	2884	C=C1C(=O)C23C(O)C1CCC2C12COC3(O)C(O)C1C(C)(C)CCC2O	13.2345	1	0.5995	0.4005	TP	1.0421	No
-	1188	Cc1cc(Nc2ccccc2C(=O)O)ccc1Cl	5.34068	0	0.2714	-0.2714	TN	0.0223	YES
#	2888	CNC(C)C1C(O)CC2(C)C3CCC4C(C)(C)C(NC)CCC45CC35CCC12C	15.936	1	0.7118	0.2882	TP	0.0508	YES
+	3139	CN(C)c1cccc(-c2c3c(=O)n(-c4ccccc4Cl)[nH]c3cc(=O)n2C)c1	1.84529	0	0.1262	-0.1262	TN	3.0496	No
+	2899	O=C1NC(=O)/C(=C/c2ccc(-c3ccc(F)cc3)o2)S1	16.0561	1	0.7168	0.2832	TP	9.0353	No
+	1384	CC(C)=CCC1C(=O)N(c2ccccc2)N(c2ccccc2)C1=O	4.82337	0	0.2499	-0.2499	TN	0.0288	YES
-	2903	Cn1cc(-c2ccncc2)c(-c2ccc(OCc3ccc4ccccc4n3)cc2)n1	18.7991	1	0.8308	0.1692	TP	0.0604	YES
+	3377	CC(=O)N1N=C(c2ccc(N)cc2)c2cc3c(cc2CC1C)OCO3	1.2313	0	0.1007	-0.1007	TN	2.0337	No
*	2943	COc1cc(NC(=O)c2ccc(-c3ccc(Cl)cc3)o2)cc(OC)c1	20.9579	1	0.9205	0.0795	TP	3.0335	No
-	3748	CCC(=C(c1ccc(/C=C/C(=O)O)cc1)c1ccc2n[nH]cc2c1)c1ccc(F)cc1Cl	3.88315	0	0.2109	-0.2109	TN	3.038	No
*	2953	COc1cc(CCc2cc(NC(=O)c3ccc(N4CC(C)NC(C)C4)cc3)[nH]n2)cc(OC)c1	23.8681	1	1.0415	-0.0415	TP	0.0551	YES
+	923	CC=CCC(C)C(O)C1C(=O)NC(CC)C(=O)N(C)CC(=O)N(C)C(CC(C)C)C(=O)NC(C(C)C)C(=O)N(C)C(CC(C)C)C(=O)NC(C)C(=O)NC(C)C(=O)N(C)C(CC(C)C)C(=O)N(C)C(CC(C)C)C(=O)N(C)C(C(C)C)C(=O)N1C	3.51691	0	0.1957	-0.1957	TN	0.0714	YES
-	2965	CC(O)(C#Cc1ccc2c(c1)N(c1nc(N)ncc1Cl)CC2)c1nccs1	15.2569	1	0.6836	0.3164	TP	1.0543	No
+	2641	CCC1OC(=O)CC(O)C(C)C(OC2OC(C)C(OC3CC(C)(O)C(O)C(C)O3)C(N(C)C)C2O)C(CC=O)CC(C)C(=O)C=CC(C)=CC1COC1OC(C)C(O)C(OC)C1OC	0.93232	0	0.0882	-0.0882	TN	1.0636	No
-	2968	NC(=O)c1cccc(-c2cc(Nc3ccc(OC(F)(F)F)cc3)ncn2)c1	16.5701	1	0.7381	0.2619	TP	0.0466	YES
#	2592	CC(=O)OCC(=O)C12N=C(C)OC1CC1C3CCC4=CC(=O)C=CC4(C)C3C(O)CC12C	-1.18514	0	0.0002	-0.0002	TN	0.0683	YES
+	2995	NC(=O)c1noc(C(CCCC2CCCCC2)CC(=O)NO)n1	9.5651	1	0.447	0.553	FN	1.0391	No
+	3087	NC1CC1c1ccc(-c2cccc(O)c2)cc1	12.5815	0	0.5724	-0.5724	FP	0.0134	YES
#	3001	CC1(N2CCC(n3c(C4CCCNC4)nc4ccccc43)CC2)CCCCCCC1	20.2055	1	0.8892	0.1108	TP	0.0759	YES
+	3660	COc1cc(-c2cn(C)c(=O)c3cnccc23)cc(OC)c1CN(C)C	11.8805	0	0.5432	-0.5432	FP	0.0402	YES
-	3003	Cc1ccc(NC(=O)Nc2cc(C(F)(F)F)ccc2F)cc1Nc1ccc2c(c1)NC(=O)C2=Cc1ccc[nH]1	24.2003	1	1.0553	-0.0553	TP	0.0534	YES
-	1380	Cc1c(C(=O)NN2CCCCC2)nn(-c2ccc(Cl)cc2Cl)c1-c1ccc(Cl)cc1	1.45499	0	0.11	-0.11	TN	0.0555	YES
*	3020	c1ccc(CNc2nc(N3CCOc4ccccc43)nc3c2CCCC3)cc1	21.8344	1	0.9569	0.0431	TP	0.0647	YES
-	2721	CC1(C)C(C=C(Cl)Cl)C1C(=O)OCc1c(F)c(F)cc(F)c1F	8.31365	0	0.395	-0.395	TN	0.0339	YES
#	3026	N#Cc1c(C2CCNCC2)cc(-c2c(O)cccc2OCC2CC2)nc1N	16.9197	1	0.7527	0.2473	TP	0.0475	YES
+	446	CCCCOc1cc(C(=O)OCCN(CC)CC)ccc1N	10.1398	0	0.4709	-0.4709	TN	0.0214	YES
*	3033	O=C1CSC(=O)N1C(CCc1ccncc1)COc1ccc(-c2cccc([N+](=O)[O-])c2)cc1	20.8015	1	0.914	0.086	TP	0.0521	YES
*	520	O=c1cc(CO)occ1O	-0.03116	0	0.0482	-0.0482	TN	2.0167	No
#	3073	COc1ccc(C(O)C(C)Oc2ccc(C3OC(c4ccc(OC(C)C(O)c5ccc(OC)c(OC)c5)c(OC)c4)C(C)C3C)cc2OC)cc1OC	24.2444	1	1.0571	-0.0571	TP	0.1168	YES
+	1592	CC(=O)OCC(=O)NCCCOc1cccc(CN2CCCCC2)c1	11.6234	0	0.5326	-0.5326	FP	0.0333	YES
-	3081	Cc1cc(Nc2ncc(Cl)c(Nc3ccccc3S(=O)(=O)C(C)C)n2)c(OC(C)C)cc1C1CCNCC1	13.9445	1	0.629	0.371	TP	0.0439	YES
*	301	COc1cc2nc(N3CCN(C(=O)C4CCCO4)CC3)nc(N)c2cc1OC	-0.41736	0	0.0321	-0.0321	TN	1.066	No
-	3083	NC(=O)c1cnc(NC2CCCCC2N)nc1Nc1cccc(-n2nccn2)c1	23.5909	1	1.0299	-0.0299	TP	0.0525	YES
-	3301	Cc1cc(C)c2c(c1)C(N(Cc1cc(C(F)(F)F)cc(C(F)(F)F)c1)c1nnn(C)n1)CCCN2CC1CCC(C(=O)O)CC1	12.58	0	0.5723	-0.5723	FP	0.0785	YES
+	3084	CCOc1ccccc1-n1c(C(C)N2CCN(C(=O)COc3ccc(Cl)cc3)CC2)nc2ccccc2c1=O	8.76406	1	0.4137	0.5863	FN	2.0683	No
+	2678	COC1C(O)CC(=O)OC(C)CC=CC=CC(O)C(C)CC(CC=O)C1OC1OCC(OC2CC(C)(O)C(O)C(C)O2)C(N(C)C)C1O	10.0443	0	0.4669	-0.4669	TN	0.0485	YES
*	3089	Cc1cn(CCN2CCN(c3ccccc3-c3cc(C#N)cc(C(=O)NCCCN4CCCC4)c3)CC2)c2ccccc12	18.3798	1	0.8134	0.1866	TP	0.0833	YES
+	3884	CC(=O)N1CCC(C(=O)N(CCCN2CCC(Cc3ccc(C(N)=O)cc3)CC2)c2ccc(C)c(Cl)c2)CC1	5.82983	0	0.2918	-0.2918	TN	0.0501	YES
-	3110	Cn1c(NCC(N)Cc2ccccc2)nc(-c2ccncc2)c(-c2ccc3ccccc3c2)c1=O	15.3486	1	0.6874	0.3126	TP	0.0468	YES
-	1245	C=C1C(=CC=C2CCCC3(C)C2CCC3C(C)CCCC(C)(C)O)CC(O)CC1O	9.09681	0	0.4276	-0.4276	TN	0.0376	YES
+	3121	COc1ccc(CNC(=O)Nc2ncc([N+](=O)[O-])s2)cc1	11.6112	1	0.5321	0.4679	TP	2.0329	No
-	3292	CCC(CC)CC1(C(=O)Nc2ccccc2SC(=O)C(C)C)CCCCC1	12.1473	0	0.5543	-0.5543	FP	0.0384	YES
#	3122	N#Cc1ccc2[nH]cc(CCCCN3CCN(c4ccc5oc(C(N)=O)cc5c4)CC3)c2c1	30.7318	1	1.3267	-0.3267	TP	0.1025	YES
*	3949	NC(Cc1c[nH]c2ccc(O)cc12)C(=O)O	5.14537	0	0.2633	-0.2633	TN	1.0149	No
+	3125	CCCN1CCN(c2ccc(C(=O)NC3(C(=O)NCC#N)CCCCC3)cc2)CC1	9.72189	1	0.4535	0.5465	FN	0.0428	YES
*	3691	CC(NC(=O)CCC(F)(F)F)C(=O)NC1C(=O)N(CCO)c2ncccc2-c2ccccc21	7.81903	0	0.3744	-0.3744	TN	0.051	YES
*	3145	O=c1ccc2ccc(OCCCCN3CCN(c4cccc5sccc45)CC3)cc2[nH]1	28.9736	1	1.2536	-0.2536	TP	1.0775	No
-	3275	O=C(NO)c1ccc(CC(=O)N(CCO)c2ccccc2)cc1	9.48874	0	0.4438	-0.4438	TN	1.0202	No
*	3147	CNC(C)C(=O)NC(C(=O)N1CCCC1c1nc(C(=O)c2ccc(F)cc2)cs1)C1CCCCC1	10.0948	1	0.469	0.531	FN	0.0419	YES
*	2883	CC1(C)CC(C(=O)O)C2CCC3(C)C(=CCC4C5(C)CCC(O)C(C)(C)C5CCC43C)C2C1	-0.65025	0	0.0225	-0.0225	TN	0.0759	YES
+	3148	COc1cc(NC(=O)Nc2cccc(CNC(=O)OC3CCOC3)c2)ccc1-c1cnco1	21.8703	1	0.9584	0.0416	TP	1.0534	No
-	2489	CNC1CCC(N(Cc2cccc(-c3ccncc3)c2)C(=O)c2sc3c(F)ccc(F)c3c2Cl)CC1	15.3616	0	0.6879	-0.6879	FP	0.0682	YES
#	3155	Cc1ncc(NC(=O)c2ccc(CN3CCN(C)CC3)c(C(F)(F)F)c2)cc1Nc1nccc(-c2cccnc2)n1	25.6317	1	1.1148	-0.1148	TP	0.0663	YES
#	1524	O=c1[nH]c(=O)n(C2CC(O)C(CO)O2)cc1C(F)(F)F	-0.52832	0	0.0275	-0.0275	TN	0.0468	YES
#	3170	CCCC(NC1CCc2cc(F)cc(F)c2C1)C(=O)Nc1cn(C(C)(C)CNCC(C)(C)C)cn1	14.5211	1	0.653	0.347	TP	0.0386	YES
-	1497	O=C(Nc1ccc([N+](=O)[O-])cc1)Nc1ccc([N+](=O)[O-])cc1	4.61988	0	0.2415	-0.2415	TN	0.0206	YES
-	3205	COc1cccc(N2CCN(C3=Nc4c(F)cccc4C(CC(=O)O)N3c3cc(C(F)(F)F)ccc3OC)CC2)c1	21.214	1	0.9311	0.0689	TP	3.0873	No
+	2891	NC1(C(=O)O)CS(=O)(=O)C2C(C(=O)O)C21	-7.32619	0	-0.255	0.255	TN	0.0418	YES
*	3208	O=C1NC(=O)C(c2cnc3ccccn23)=C1c1cn2c3c(cc(F)cc13)CN(C(=O)N1CCCCC1)CC2	26.3713	1	1.1455	-0.1455	TP	0.0588	YES
+	2201	COCCCOc1cc(CC(CC(N)C(O)CC(C(=O)NCC(C)(C)C(N)=O)C(C)C)C(C)C)ccc1OC	2.4712	0	0.1522	-0.1522	TN	0.0323	YES
#	3212	Cn1cc(-c2cc(Oc3cc(F)c(NC(=O)C4(C(=O)Nc5ccccc5)CC4)cc3F)ccn2)cn1	23.7328	1	1.0358	-0.0358	TP	0.1217	YES
#	1039	C[n+]1cccc(C(=O)O)c1	2.92423	0	0.171	-0.171	TN	0.0073	YES
#	3224	C=CC1(C)CC(OC(=O)CSC2CC3CCC(C2)N3C)C2(C)C(C)CCC3(CCC(=O)C32)C(C)C1O	20.1346	1	0.8863	0.1137	TP	0.0757	YES
+	3883	CC(C)CN(CC(O)C(Cc1ccccc1)NC(=O)C(NC(=O)CNCc1cccc(F)c1)C(C)(C)C)S(=O)(=O)c1cccc(N)c1	8.58929	0	0.4065	-0.4065	TN	0.0399	YES
+	3239	CS(=O)(=O)N1CCC(NC(=O)c2[nH]ncc2NC(=O)c2c(Cl)cccc2Cl)CC1	4.27249	1	0.2271	0.7729	FN	0.0488	YES
#	2335	CC1=C2N=C(C=C3N=C(C(C)=C4C(CCC(N)=O)C(C)(CC(N)=O)C(C)(C5N=C1C(C)(CCC(=O)NCC(C)OP(=O)(O)OC1C(CO)OC(n6cnc7cc(C)c(C)cc76)C1O)C5CC(N)=O)N4[Co+]C#N)C(C)(CC(N)=O)C3CCC(N)=O)C(C)(C)C2CCC(N)=O	6.72692	0	0.3291	-0.3291	TN	0.1678	YES
#	3246	CCCCCOc1ccc(-c2ccc(-c3ccc(C(=O)NC4CC(O)C(O)NC(=O)C5C(O)C(C)CN5C(=O)C(C(C)O)NC(=O)C(C(O)C(O)c5ccc(O)cc5)NC(=O)C5CC(O)CN5C(=O)C(C(C)O)NC4=O)cc3)cc2)cc1	39.6175	1	1.696	-0.696	TP	0.1517	YES
+	2713	O=C(O)C(O)C(O)C(O)C(O)C(=O)O	-11.8695	0	-0.4438	0.4438	TN	0.0142	YES
*	3251	CCCC1(CCC)CCC2(CCN(CCCN(CC)CC)C2)CC1	8.98532	1	0.4229	0.5771	FN	0.0199	YES
+	1903	COc1ccc2c(=O)c(C)c(-c3ccccc3)oc2c1CN(C)C	-1.10081	0	0.0037	-0.0037	TN	2.034	No
-	3252	CC1(C)CN2C(CSC(=NC3CCCCC3)NC3CCCCC3)=CSC2=N1	23.1603	1	1.012	-0.012	TP	2.0806	No
*	967	CC(=O)NCc1c(I)c(NC(C)=O)c(I)c(C(=O)O)c1I	-2.83795	0	-0.0685	0.0685	TN	2.019	No
-	3266	CON(C)C(=O)N1N=C(c2cc(F)ccc2F)SC1(CCCN)c1ccccc1	18.7312	1	0.828	0.172	TP	2.0396	No
#	903	Nc1ncnc2c1ncn2C1OC(CO)CC1O	4.73263	0	0.2462	-0.2462	TN	0.0362	YES
#	3278	Cc1nc(C)c(CN2CCN(C(c3ccc(F)cc3)c3ccc(F)cc3)CC2)nc1C	15.5299	1	0.6949	0.3051	TP	0.0488	YES
+	2633	CC12C=CC(=O)C=C1CCC1C2C(O)CC2(C)C1CCC2(O)C(=O)COC(=O)CCC(=O)O	0.0286	0	0.0507	-0.0507	TN	0.0471	YES
#	3286	Nc1ncnc2c1c(-c1cccc(OCc3ccccc3)c1)cn2C1CC(CN2CCCC2)C1	19.2786	1	0.8507	0.1493	TP	0.0587	YES
-	2817	COC1CCC(N(C(=O)C2CCC(C)CC2)c2cc(C3=CCCCC3)sc2C(=O)O)CC1	-6.97691	0	-0.2405	0.2405	TN	2.042	No
#	3297	Cc1cncc(CN2CCC(=C3c4ccc(Cl)cc4CCc4cccnc43)CC2)c1	28.6738	1	1.2412	-0.2412	TP	0.0706	YES
-	801	NCCNCCNCCNCCN	5.05531	0	0.2596	-0.2596	TN	0.0062	YES
-	3302	Cn1nc(C(C)(C)C)cc1C(=O)NC(Cc1cccc(Cl)c1)C(=O)NCC#N	12.2777	1	0.5598	0.4402	TP	0.0437	YES
#	2523	CCCn1c(=O)c2[nH]c(C34CC5CC(CC3C5)C4)nc2n(CCC)c1=O	-7.14968	0	-0.2477	0.2477	TN	0.0754	YES
-	3312	CCC(C)Nc1cc(C(=O)NC2CC3CCC(C2)N3c2ccc(C(=O)C3CC3)cn2)c(C)cc1C(N)=O	16.6076	1	0.7397	0.2603	TP	0.0567	YES
#	638	COC1(NC(=O)CSCC#N)C(=O)N2C(C(=O)O)=C(CSc3nnnn3C)CSC21	-3.36842	0	-0.0905	0.0905	TN	0.1061	YES
+	3322	CNCc1ccc(-c2cc(-c3nc(-c4ccc(S(=O)(=O)C(C)C)cc4)cnc3N)on2)cc1	22.8456	1	0.999	0.001	TP	2.0718	No
#	722	CCOC(=O)C(C#N)C1c2cc(Br)ccc2OC(=N)C1C(=O)OCC	8.44253	0	0.4004	-0.4004	TN	0.0548	YES
#	3327	CC(NC(=O)C(Cc1ccccc1)NC(=O)OCc1ccccc1)C(=O)CF	8.26767	1	0.3931	0.6069	FN	0.0297	YES
+	2435	COc1ccc2cccc(CCNC(C)=O)c2c1	7.1595	0	0.347	-0.347	TN	0.0159	YES
*	3331	OCCOc1ccc(C(=C(CCCl)c2ccccc2)c2ccccc2)cc1	20.8322	1	0.9153	0.0847	TP	3.025	No
#	371	COc1cc(NS(=O)(=O)c2ccc(N)cc2)nc(OC)n1	-7.60351	0	-0.2665	0.2665	TN	0.0294	YES
*	3338	CC(C)(C)c1ccc(CN2CCN(C(c3ccccc3)c3ccc(Cl)cc3)CC2)cc1	17.0195	1	0.7568	0.2432	TP	0.04	YES
#	3882	COc1cc2c(cc1OC)C1CC(OC(=O)C(N)C(C)C)C(CC(C)C)CN1CC2	9.13934	0	0.4293	-0.4293	TN	0.0249	YES
+	3348	Cc1nc2ccc(-n3ncc(C(=O)c4cc5ccccc5[nH]4)c3N)cc2[nH]1	19.1251	1	0.8443	0.1557	TP	1.0931	No
-	3050	Cc1ccc2nc(NC(=O)CSc3nc4c(c(=O)n3-c3ccccc3)SCC4)sc2c1	1.16838	0	0.098	-0.098	TN	1.0855	No
-	3356	Nc1nc(Nc2ccc3c(c2)CCC(N2CCCC2)CC3)nn1-c1cc2c(nn1)-c1ccccc1CCC2	21.5414	1	0.9448	0.0552	TP	2.0754	No
+	1991	CCc1cc2c(s1)-n1c(C)nnc1CN=C2c1ccccc1Cl	6.96284	0	0.3389	-0.3389	TN	3.0499	No
*	3359	CCCCCCCCCC(=O)OCCN1CCN(CCCN2c3ccccc3Sc3ccc(C(F)(F)F)cc32)CC1	26.8036	1	1.1635	-0.1635	TP	0.0575	YES
#	2360	CC(=NNC(=O)c1ccncc1)C(=O)O	4.06013	0	0.2182	-0.2182	TN	0.0187	YES
*	3361	CC(C)(CNC(=O)c1cccc(-c2noc(C(F)(F)F)n2)c1)c1coc(-c2ccccc2)n1	17.6756	1	0.7841	0.2159	TP	0.0603	YES
-	2206	COC(C(=O)C(O)C(C)O)C1Cc2cc3cc(OC4CC(OC5CC(O)C(OC)C(C)O5)C(OC(C)=O)C(C)O4)c(C)c(O)c3c(O)c2C(=O)C1OC1CC(OC2CC(OC3CC(C)(O)C(OC(C)=O)C(C)O3)C(O)C(C)O2)C(O)C(C)O1	-8.65179	0	-0.3101	0.3101	TN	1.1177	No
#	3368	CC(C=CC1CC1(C)c1ccc2c(c1)C(C)(C)CCC2(C)C)=CC(=O)O	10.3343	1	0.479	0.521	FN	0.0293	YES
-	2925	COc1cc(F)c(C(C)C)cc1-c1ccc(C(F)(F)F)cc1CN1C(=O)OC(c2cc(C(F)(F)F)cc(C(F)(F)F)c2)C1C	21.9623	0	0.9622	-0.9622	FP	0.0824	YES
#	3370	CC#CC(CC(=O)O)c1ccc(OCc2cccc(-c3ccc(C(F)(F)F)cc3)c2)cc1	21.7495	1	0.9534	0.0466	TP	0.0494	YES
*	2509	C1Cc2[nH]nc(-c3nn[nH]n3)c2C1	-0.2271	0	0.04	-0.04	TN	0.0213	YES
*	3381	Fc1ccc(-c2[nH]c(-c3ccccc3F)nc2-c2ccncc2)cc1	8.22588	1	0.3914	0.6086	FN	0.031	YES
#	1301	CC(=O)NC(CC(C)C)C(=O)NC(CC(C)C)C(=O)NC(C=O)CCCNC(=N)N	1.68752	0	0.1196	-0.1196	TN	0.0281	YES
+	3382	O=C(CCCN1CCC(n2c(=S)[nH]c3ccccc32)CC1)c1ccc(F)cc1	19.9075	1	0.8769	0.1231	TP	1.0394	No
*	324	NNC(=O)c1ccncc1	7.63162	0	0.3667	-0.3667	TN	0.0071	YES
#	3384	Clc1cc2c(NC3CCCC3)nnc(-c3ccncc3)c2cc1Cl	7.27388	1	0.3518	0.6482	FN	0.0386	YES
#	2253	CC(=O)Nc1ccc(C(=O)NC(C)(C)C)cc1	4.96576	0	0.2559	-0.2559	TN	0.014	YES
-	3390	O=C(O)c1ccc(CCCc2ccc(OCCc3ccc(F)cc3)cc2)o1	18.8963	1	0.8348	0.1652	TP	0.0348	YES
-	3534	Cc1cc(F)c(C(=O)Nc2cccc(-c3nncn3C(C)C)n2)cc1-n1cnc(C2CC2)c1	10.1755	0	0.4724	-0.4724	TN	2.0672	No
-	3398	CN1CCC(c2c(O)cc(O)c3c(=O)cc(-c4ccc(C(F)(F)F)cc4Cl)oc23)C1CO	9.11436	1	0.4283	0.5717	FN	4.0643	No
-	2249	CNC(=O)c1ccccc1Sc1ccc2c(C=Cc3ccccn3)[nH]nc2c1	14.346	0	0.6457	-0.6457	FP	0.0333	YES
#	3411	O=C(Nc1ncc([N+](=O)[O-])s1)c1ccccc1O	9.21784	1	0.4326	0.5674	FN	0.0241	YES
-	2815	CNC(=O)c1c(-c2ccc(F)cc2)oc2cc(N(CCO)S(C)(=O)=O)c(C3CC3)cc12	1.1505	0	0.0973	-0.0973	TN	1.0474	No
#	3415	COc1cc(N2CCN(C)CC2)ccc1Nc1nccc(-c2cn(C)c3cnccc23)n1	21.6489	1	0.9492	0.0508	TP	0.0534	YES
-	2512	COc1ccc(COc2cc3oc(=O)c4cc(C(C)O)ccc4c3cc2OC)cc1	3.3846	0	0.1902	-0.1902	TN	0.0552	YES
#	3463	CCCCNc1ncc2c(-c3ccc(CN4CCN(C)CC4)cc3)cn(C3CCC(O)CC3)c2n1	18.8052	1	0.831	0.169	TP	0.0651	YES
+	1432	CCC(=O)NCC(Cc1ccc(OCCc2nc(-c3ccccc3)oc2C)cc1)NC(C)=CC(=O)c1ccc(C(F)(F)F)cc1	13.703	0	0.619	-0.619	FP	2.0618	No
#	3464	COc1ccc(C(C)(C)C)cc1CNC1C2CCN(CC2)C1C(c1ccccc1)c1ccccc1	26.1898	1	1.1379	-0.1379	TP	0.037	YES
*	3572	CC(C)c1cc(C(=O)N2CCC(NC(=O)C3CC3)C2)[nH]n1	0.7029	0	0.0787	-0.0787	TN	0.0319	YES
+	3469	O=C1Nc2nc(-c3c(O)cccc3OCC3CC3)cc(C3CCCNC3)c2CO1	19.0793	1	0.8424	0.1576	TP	0.0479	YES
+	1093	CCCCCCCCCCCCCCCCCCCCCCO	12.5695	0	0.5719	-0.5719	FP	0.0152	YES
-	3475	CC(C)C(O)(c1ccc2cc(OC(F)F)c(OC(F)F)cc2c1)c1cn[nH]n1	6.25023	1	0.3092	0.6908	FN	0.0385	YES
*	1538	CCN(CC)CCOC(=O)C1(c2ccccc2)CCCC1	3.81896	0	0.2082	-0.2082	TN	0.0175	YES
*	3483	O=C1NNc2nc(CN3Cc4ccccc4C3)nc3cccc1c23	22.6953	1	0.9927	0.0073	TP	2.0569	No
#	2295	OCC1OC(Oc2cc(O)cc(C=Cc3ccc(O)cc3)c2)C(O)C(O)C1O	-0.49979	0	0.0287	-0.0287	TN	0.035	YES
-	3508	CCCCCCCCCCCCCCCCOc1nc2ccc(C)cc2c(=O)o1	15.2908	1	0.685	0.315	TP	0.0363	YES
+	3846	CCC1CCCCN1C(=O)n1ncc(C(O)(c2ccccc2)c2ccccc2)n1	9.5556	0	0.4466	-0.4466	TN	0.0366	YES
*	3511	COCCNC(=O)Nc1ccc2nc(-c3cccs3)c(-c3cccs3)nc2c1	21.5192	1	0.9438	0.0562	TP	6.0419	No
#	2977	NC1=NC2CSC(CCCCC(=O)O)C2N1	-5.02006	0	-0.1591	0.1591	TN	0.0425	YES
#	3514	CC1CN(CC(=O)N2CC(C)(C)c3ncc(Cc4ccc(F)cc4)cc32)C(CN2CCOCC2C)CN1	21.5903	1	0.9468	0.0532	TP	0.0725	YES
+	656	CC12CCC3C(CCC4=CC(=O)CCC43C)C1CCC2=O	4.44344	0	0.2342	-0.2342	TN	1.0429	No
+	3525	CC1=C2CC3C(CCC4CC(NS(C)(=O)=O)CCC43C)C2CCC2(C1)OC1CC(C)CNC1C2C	16.7765	1	0.7467	0.2533	TP	0.0668	YES
#	2694	CCCCC(C)CC(O)C=CC1C(O)CC(=O)C1CCCCC=CC(=O)O	0.98743	0	0.0905	-0.0905	TN	0.0231	YES
#	3530	CCCCCCC(C)(C)c1cc(O)c2c(c1)OC(C)(C)C1CC=C(CO)CC21	15.0213	1	0.6738	0.3262	TP	0.0237	YES
-	2385	COCCOc1cccc(S(=O)(=O)Nc2ncccn2)c1	14.2756	0	0.6428	-0.6428	FP	0.0365	YES
+	3532	COc1ccccc1C(=O)Nc1cc2c(cc1N1CCCC1)n(C)c(=O)n2C	12.0229	1	0.5492	0.4508	TP	2.0367	No
-	895	N#CC(C(=N)Sc1ccc(N)cc1)c1ccccc1C(F)(F)F	11.3784	0	0.5224	-0.5224	FP	0.0444	YES
*	3544	C=CC(=O)Nc1cccc(C)c1Nc1ncc2cc(-c3c(Cl)c(OC)cc(OC)c3Cl)ccc2n1	27.5029	1	1.1925	-0.1925	TP	3.0415	No
*	1812	CC1(C)OC2CC3C4CC(F)C5=CC(=O)C=CC5(C)C4C(O)CC3(C)C2(C(=O)CO)O1	7.17414	0	0.3476	-0.3476	TN	1.0901	No
-	3567	Cc1cc(C)c(CNC(=O)c2cc(-c3ccc(N4CCN(C)CC4)nc3)cc3c2c(C)cn3C(C)C)c(=O)[nH]1	16.4348	1	0.7325	0.2675	TP	0.0598	YES
-	3074	O=C(NOCCO)c1ccc2cncn2c1Nc1ccc(I)cc1F	19.6743	0	0.8672	-0.8672	FP	0.0325	YES
-	3586	COc1nc(OCc2cccc(-c3ccccc3)c2C)ccc1CNCCNC(C)=O	17.0372	1	0.7576	0.2424	TP	0.0395	YES
+	2286	CN(C)c1ccc(Nc2nc(N)n(C(=O)c3c(F)cccc3F)n2)cc1	4.12783	0	0.221	-0.221	TN	0.0395	YES
+	3591	Nc1nc(OC(c2ccc(-c3cccc(F)c3)cc2)C(F)(F)F)cc(-c2ccc(CC(N)C(=O)O)cc2)n1	14.5402	1	0.6538	0.3462	TP	0.0565	YES
+	3773	CS(=O)(=O)c1cc(-c2ccccc2)cc(S(=O)(=O)c2ccc(CN)s2)c1	7.22082	0	0.3496	-0.3496	TN	3.0415	No
#	3593	CCOC(=O)NC1CCC2C(C1)CC1C(=O)OC(C)C1C2C=Cc1ccc(-c2cccc(F)c2)cn1	19.1969	1	0.8473	0.1527	TP	0.0481	YES
-	310	COc1ccccc1N1CCN(CCCNc2cc(=O)n(C)c(=O)n2C)CC1	4.75303	0	0.247	-0.247	TN	1.0384	No
-	3607	COCCNCc1ccc(-c2cc3nccc(Oc4ccc(NC(=S)NC(=O)Cc5ccc(F)cc5)cc4F)c3s2)nc1	32.9102	1	1.4172	-0.4172	TP	4.1019	No
*	2669	CC12CCC(=O)C=C1CCC1C3CCC(O)(C(=O)CO)C3(C)CC(O)C12F	-12.0604	0	-0.4517	0.4517	TN	0.0369	YES
+	3619	CC12CCC3c4ccc(OC(=O)N(CCCl)CCCl)cc4CCC3C1CCC2OP(=O)(O)O	20.0934	1	0.8846	0.1154	TP	7.0784	No
-	1439	CCN(CC)CCCCNc1ncc2cc(-c3cc(OC)cc(OC)c3)c(NC(=O)NC(C)(C)C)nc2n1	14.1697	0	0.6384	-0.6384	FP	0.0434	YES
-	3638	CCC(NC(=O)C(CS(=O)(=O)CC1CC1)NC(c1ccc(F)cc1)C(F)(F)F)C(=O)C(=O)NC1CC1	7.38855	1	0.3566	0.6434	FN	0.0577	YES
*	502	CCCOc1ccc(C(=O)OCCN(CC)CC)cc1N	9.53912	0	0.4459	-0.4459	TN	0.0208	YES
#	3644	COc1ccc2c(c1)C1(CC1c1ccc3c(C=Cc4ccc(CN5CC(C)OC(C)C5)cc4)[nH]nc3c1)C(=O)N2	27.2042	1	1.1801	-0.1801	TP	0.0791	YES
#	690	N=C(N)N/N=C/c1c(Cl)cccc1Cl	1.86246	0	0.1269	-0.1269	TN	0.0286	YES
#	3653	Cn1ncc2cc(-c3cnc(N)c(Cl)c3N3CCC4(CCNC4=O)CC3)ccc21	21.755	1	0.9536	0.0464	TP	0.0715	YES
+	1345	CCN(CC)CCOc1ccc(C(=C(Cl)c2ccccc2)c2ccccc2)cc1	12.5489	0	0.571	-0.571	FP	0.029	YES
+	3685	CC(C)CC1C(=O)OC(Cc2ccc(N3CCOCC3)cc2)C(=O)N(C)C(CC(C)C)C(=O)OC(C)C(=O)N(C)C(CC(C)C)C(=O)OC(Cc2ccc(N3CCOCC3)cc2)C(=O)N(C)C(CC(C)C)C(=O)OC(C)C(=O)N1C	8.84545	1	0.4171	0.5829	FN	0.0972	YES
#	77	CN1C(=O)CCS(=O)(=O)C1c1ccc(Cl)cc1	2.45362	0	0.1515	-0.1515	TN	0.0283	YES
+	3708	COc1cc(N2CCN(C)CC2)ccc1Nc1ncc2c(n1)N(C)c1ccccc1C(=O)N2	17.5252	1	0.7778	0.2222	TP	0.0503	YES
#	1989	O=P(O)(O)OC(Cn1cncn1)(Cn1cncn1)c1ccc(F)cc1F	-1.04394	0	0.0061	-0.0061	TN	0.0732	YES
+	3714	CC(C)(O)CNc1ncc(-c2ccnc(Nc3ccncc3)n2)c(CC2CC2)n1	15.1187	1	0.6778	0.3222	TP	0.0479	YES
-	3706	COc1ccc(Oc2cc(NCCC(F)(F)F)c3ncc(-c4ccc(C(=O)NC5CC5)c(C)c4)n3n2)c(F)c1F	7.34394	0	0.3547	-0.3547	TN	0.0936	YES
-	3721	CC1(C)C(=O)N(c2ccc(C#N)c(C(F)(F)F)c2)C(=S)N1Cc1ccc(-c2cn[nH]n2)cc1	14.599	1	0.6562	0.3438	TP	1.0573	No
#	1077	Cn1c(=O)c2c(ncn2CC2OCCO2)n(C)c1=O	2.56735	0	0.1562	-0.1562	TN	0.0543	YES
-	3725	CCc1ccc(N(CC(C)C)S(=O)(=O)c2ccc(OCC3CCOCC3)c(CO)c2)cc1	6.54148	1	0.3214	0.6786	FN	0.037	YES
+	2785	CCN(CC)CCNC(=O)c1ccc2nc(-c3ccccc3)c(-c3ccc(CN4CCC(n5c(=O)[nH]c6ccccc65)CC4)cc3)nc2c1	-1.27415	0	-0.0035	0.0035	TN	7.0992	No
*	3732	c1ccc2c(-c3cnn4cc(-c5ccc(OCCN6CCOCC6)cc5)cnc34)ccnc2c1	15.7195	1	0.7028	0.2972	TP	0.092	YES
#	3804	O=C(CBr)N1CC([N+](=O)[O-])([N+](=O)[O-])C1	-0.17302	0	0.0423	-0.0423	TN	0.0206	YES
#	3739	CCCCCCCC(=O)NC(CN1CCCC1)C(O)c1ccc2c(c1)OCCO2	24.3993	1	1.0635	-0.0635	TP	0.0274	YES
*	1266	CC(=O)OCC1=C(C(=O)O)N2C(=O)C(NC(=O)CSc3ccncc3)C2SC1	6.68205	0	0.3272	-0.3272	TN	0.0655	YES
+	3742	C=CC(=O)NC1CCOCC1Nc1ncc2cc(-c3c(Cl)c(OC)cc(OC)c3Cl)ccc2n1	20.31	1	0.8936	0.1064	TP	3.042	No
+	1915	Cc1nc(Nc2ncc(C(=O)Nc3c(C)cccc3Cl)s2)cc(N2CCN(CCO)CC2)n1	8.33688	0	0.396	-0.396	TN	6.0539	No
#	3747	Cn1cc(-c2ccc(-c3cncc(Cl)c3N3CCC4(CCNC4=O)CC3)cc2)cn1	24.2822	1	1.0587	-0.0587	TP	0.0718	YES
-	2490	Cc1cc(-c2ccc(CC(=O)Nc3ccc(-c4cccnc4)cc3)cc2)ccn1	17.7068	0	0.7854	-0.7854	FP	0.0527	YES
*	3755	CONC(=O)Nc1ccc(-c2sc3c(c2CN(C)Cc2ccccc2)c(=O)n(-c2ccccc2)c(=O)n3Cc2c(F)cccc2F)cc1	10.7066	1	0.4945	0.5055	FN	1.0703	No
*	3181	CN(C)Cc1cccc(N/C(=C2\C(=O)Nc3cc(C(N)=O)ccc32)c2ccccc2)c1	17.4296	0	0.7739	-0.7739	FP	1.0337	No
-	3759	c1ccc(-c2cc(CCC3CCNCC3)c3ccccc3n2)cc1	12.8983	1	0.5855	0.4145	TP	0.0279	YES
+	1900	CC(=O)Nc1c(I)c(C(=O)O)c(I)c(N(C)C(C)=O)c1I	1.23274	0	0.1007	-0.1007	TN	2.0208	No
*	3776	COc1cc(C(=O)NC(=N)Nc2ccc(C)c(NC(=O)c3ccc(-c4ccccc4)cc3)c2)cc(OC)c1OC	14.2128	1	0.6402	0.3598	TP	0.0718	YES
-	600	OCCOCCN1CCN(C(c2ccccc2)c2ccc(Cl)cc2)CC1	14.476	0	0.6511	-0.6511	FP	0.0217	YES
#	3779	CC(C(=O)Nc1ccc(Cl)cc1)C1CCC(c2ccnc3ccc(F)cc23)CC1	20.0023	1	0.8808	0.1192	TP	0.0348	YES
-	490	CCn1cc(C(=O)O)c(=O)c2cc(F)c(N3CCNCC3)cc21	4.97468	0	0.2562	-0.2562	TN	0.041	YES
-	3794	Cc1cc2cc(Oc3ccnc(Nc4cccc(CS(=O)(=O)NCCN(C)C)c4)n3)ccc2[nH]1	14.8911	1	0.6684	0.3316	TP	0.0643	YES
+	314	COc1ccccc1N1CCN(CCN(C(=O)C2CCCCC2)c2ccccn2)CC1	17.2417	0	0.7661	-0.7661	FP	1.0353	No
#	3795	O=C(C=Cc1ccc(Cl)cc1)N1CCC2(CC1)CN(Cc1ccc(Cl)c(Cl)c1)C(=O)O2	19.402	1	0.8558	0.1442	TP	0.0394	YES
*	1283	CCCCC(C)(O)CC=CC1C(O)CC(=O)C1CCCCCCC(=O)OC	-0.37395	0	0.0339	-0.0339	TN	0.0232	YES
-	3806	Cc1cc(OC(CCC(F)(F)F)c2ccc(C(=O)NCCC(=O)O)cc2)cc(C)c1-c1ccc(C(C)(C)C)cc1	12.517	1	0.5697	0.4303	TP	0.0507	YES
+	1485	CN(C)CCOC(c1ccc(Cl)cc1)c1ccccn1	12.8413	0	0.5832	-0.5832	FP	0.0167	YES
#	3809	CCNCCc1ccc(CN(CC)c2cc(OC)ccc2C2CCc3cc(O)ccc3C2)cc1	20.7251	1	0.9108	0.0892	TP	0.0313	YES
#	2756	COc1cc(N2CCC(N3CCN(C)CC3)CC2)ccc1Nc1ncnc(Nc2ccccc2S(=O)(=O)C(C)C)n1	12.6157	0	0.5738	-0.5738	FP	0.0772	YES
+	3823	CC1CC(N)CC(c2ccncc2NC(=O)c2ccc(F)c(-c3c(F)cccc3F)n2)C1	18.9436	1	0.8368	0.1632	TP	0.0376	YES
-	2377	CCN(CC)CC(=O)Nc1c(C)cccc1C(=O)OC	7.01064	0	0.3409	-0.3409	TN	0.0167	YES
-	3840	CC1=C(c2ccc(O)cc2)C(c2ccc(OCCN3CCCCC3)cc2)Oc2cc(O)ccc21	20.7615	1	0.9123	0.0877	TP	0.0466	YES
-	2164	Nc1c(CC(=O)O)cccc1C(=O)c1ccccc1	9.1655	0	0.4304	-0.4304	TN	0.0155	YES
+	3841	CCN(CC)CCNc1ccc(C)c2sc3ccccc3c(=O)c12	14.189	1	0.6392	0.3608	TP	0.0381	YES
+	3162	CCCCC(NC(=O)C1C2C(CN1C(=O)C(NC(=O)NC1(CS(=O)(=O)C(C)(C)C)CCCCC1)C(C)(C)C)C2(C)C)C(=O)C(=O)NC1CC1	5.34551	0	0.2716	-0.2716	TN	0.069	YES
+	3848	CC(C)(O)C1CCC(Nc2ccc3ncc(-c4cccc(C(F)(F)F)c4)n3n2)CC1	6.2519	1	0.3093	0.6907	FN	0.0631	YES
-	2492	COc1cc(OC2CCN(C)CC2)ccc1Nc1ncc2c(n1)n(C1CCCC1)c(=O)n2C	14.6782	0	0.6595	-0.6595	FP	1.054	No
-	3913	Cc1cc(O)ccc1C(C)(C)C	4.23417	1	0.2255	0.7745	FN	0.0061	YES
#	3261	COC1CCN(C(=O)c2cc(Cc3n[nH]c(=O)c4ccccc34)ccc2F)CC1	-1.36319	0	-0.0072	0.0072	TN	0.0453	YES
*	3951	Cc1ccc(NCCN(C)CCNc2ccnc3cc(Cl)ccc23)c2c(=O)c3ccccc3sc12	18.6982	1	0.8266	0.1734	TP	3.0485	No
*	1747	Cc1ccc(C(=O)c2ccc(CC(=O)O)n2C)cc1	5.92952	0	0.2959	-0.2959	TN	0.0212	YES
-	3953	CCCCOCCOc1ccc(-c2ccc3c(c2)/C=C(/C(=O)Nc2ccc(S(=O)Cc4cncn4CCC)cc2)CCCN3CC(C)C)cc1	20.8761	1	0.9171	0.0829	TP	5.0811	No
*	1720	COc1cc2c3cc1Oc1cc(ccc1O)CC1c4c(cc(OC)c(O)c4Oc4ccc(cc4)CC3N(C)CC2)CC[N+]1(C)C	9.52924	0	0.4455	-0.4455	TN	0.0824	YES
#	3954	N#CC1(c2ccc3c(N)ncnn23)OC(CO)C(O)C1O	10.3883	1	0.4812	0.5188	FN	0.0421	YES
*	835	CCN(CC)C(=O)c1cccc(C)c1	7.67391	0	0.3684	-0.3684	TN	0.0085	YES
#	3956	CCC(CC)COC(=O)C(C)NP(=O)(OCC1OC(C#N)(c2ccc3c(N)ncnn23)C(O)C1O)Oc1ccccc1	15.1033	1	0.6772	0.3228	TP	0.0826	YES
-	3099	O=C(Nc1cccnc1)c1cc(-c2ccnc(F)c2)ccc1OCc1ccccc1	15.8607	0	0.7087	-0.7087	FP	0.0293	YES

## Sheet: Table S5
Set	ID	SMILES	DCW	Expr	Calc	Expr-Calc	Class	DefectSMILES	Applicability
*	6	CN1CCN(CCCN2c3ccccc3Sc3ccc(C(F)(F)F)cc32)CC1	23.9438	1	1.0615	-0.0615	TP	0.0506	YES
#	907	COC1CCC(C(=O)c2ccc3nc4c(cc3c2)CCCO4)CC1	-0.60737	0	0.1319	-0.1319	TN	0.0337	YES
#	10	CN1C2CCC1CC(OC(c1ccccc1)c1ccccc1)C2	17.4195	1	0.8145	0.1855	TP	0.0171	YES
*	3862	Cc1nn(C)c2c1C(c1ccccc1F)=NCC(=O)N2C	-0.00338	0	0.1548	-0.1548	TN	3.0259	No
#	13	CN(C)CCC=C1c2ccccc2Sc2ccc(Cl)cc21	19.2925	1	0.8854	0.1146	TP	0.0284	YES
#	1321	O=[N+]([O-])NC1=NCCN1Cc1ccc(Cl)nc1	-0.41368	0	0.1393	-0.1393	TN	0.0232	YES
+	15	c1cc(-c2sc(-c3ccncc3)c(-c3ccncc3)c2-c2ccncc2)ccn1	24.6066	1	1.0866	-0.0866	TP	0.0664	YES
+	1091	CCCCCCCCCCCCCCCCO	11.9666	0	0.608	-0.608	FP	0.0108	YES
-	16	CN(C)CCC=C1c2ccccc2C=Cc2ccccc21	15.6372	1	0.747	0.253	TP	0.0166	YES
+	3911	CNC(=O)c1ccnc2c(C(C)CNc3cc(-c4cnc(C)nc4)ncn3)cccc12	3.63424	0	0.2925	-0.2925	TN	1.0511	No
*	20	CN(C)c1ccccc1CN1CCCN(Cc2ccccc2N(C)C)C1c1ccncc1	17.215	1	0.8067	0.1933	TP	0.0236	YES
-	1685	O=C(C=Cc1ccc(O)c(O)c1)OC1CC(O)(C(=O)O)CC(O)C1O	4.23676	0	0.3153	-0.3153	TN	0.0216	YES
#	21	CN1CCC(CN2c3ccccc3Sc3ccccc32)C1	19.2269	1	0.8829	0.1171	TP	0.0341	YES
-	2064	O=C(O)CNC(=O)CNC(=O)CNC(=O)CSC(=O)c1ccccc1	-1.30814	0	0.1054	-0.1054	TN	0.0264	YES
*	22	CNCCC=C1c2ccccc2CCc2ccccc21	14.9522	1	0.7211	0.2789	TP	0.0178	YES
*	803	O=C(O)C=CC(=O)O	-9.02787	0	-0.1869	0.1869	TN	0.0078	YES
*	25	O=C1CSC2(CCN(CCCN3c4ccccc4Sc4ccc(Cl)cc43)CC2)N1	15.2911	1	0.7339	0.2661	TP	0.0639	YES
#	734	CC(C)CC(NC(=O)C(O)C(N)Cc1ccccc1)C(=O)O	-0.63728	0	0.1308	-0.1308	TN	0.0149	YES
-	34	Clc1ccc2c(c1)C(N1CCNCC1)=Nc1ccccc1O2	15.4499	1	0.7399	0.2601	TP	0.0254	YES
#	637	CC1=Nc2ccc(Cl)cc2S(=O)(=O)N1	5.47053	0	0.3621	-0.3621	TN	0.0274	YES
#	56	CN(C)CCC=C1c2ccccc2CCc2ccccc21	14.7006	1	0.7115	0.2885	TP	0.0166	YES
*	1108	Cc1c(I)c(=O)n(-c2ccccc2)n1C	5.92907	0	0.3794	-0.3794	TN	0.0454	YES
#	57	CCCCc1oc2ccccc2c1C(=O)c1cc(I)c(OCCN(CC)CC)c(I)c1	18.1851	1	0.8435	0.1565	TP	0.0746	YES
+	500	CCOc1cc(CC(=O)NC(CC(C)C)c2ccccc2N2CCCCC2)ccc1C(=O)O	5.69909	0	0.3707	-0.3707	TN	1.0223	No
#	72	CC(C)COCC(CN(Cc1ccccc1)c1ccccc1)N1CCCC1	17.937	1	0.8341	0.1659	TP	0.0221	YES
#	1385	CC1(C)SC2C(N=CN3CCCCCC3)C(=O)N2C1C(=O)O	-3.31264	0	0.0295	-0.0295	TN	0.0514	YES
+	99	CN1CCC(=C2c3ccccc3C=Cc3ccccc32)CC1	8.95706	1	0.4941	0.5059	FN	0.022	YES
*	2940	Cc1cnc(-c2cc(N3CCN(C(=O)CCS(C)(=O)=O)CC3)ncc2Cl)c(C)c1	-0.66564	0	0.1297	-0.1297	TN	3.0486	No
*	100	CN1CCN(C2=Nc3cc(Cl)ccc3Nc3ccccc32)CC1	14.2033	1	0.6927	0.3073	TP	0.0395	YES
-	2510	COc1ccc(CC2SC(=O)NC2=O)cc1C(=O)NCc1ccc(C(F)(F)F)cc1	7.15402	0	0.4258	-0.4258	TN	0.043	YES
+	101	CCN(CC)CCCC(C)Nc1ccnc2cc(Cl)ccc12	8.71441	1	0.4849	0.5151	FN	0.0203	YES
*	1684	O=c1c(OC2OC(CO)C(O)C(O)C2O)c(-c2ccc(O)c(O)c2)oc2cc(O)cc(O)c12	-3.54832	0	0.0206	-0.0206	TN	2.0413	No
*	104	CN(C)CCCN1c2ccccc2CCc2ccc(Cl)cc21	17.2243	1	0.8071	0.1929	TP	0.02	YES
#	199	COc1ccc2[nH]cc(CCNC(C)=O)c2c1	5.0697	0	0.3469	-0.3469	TN	0.0125	YES
*	106	CN(C)CCCN1c2ccccc2Sc2ccc(Cl)cc21	21.6446	1	0.9745	0.0255	TP	0.0283	YES
+	3071	Cc1c(C(=O)N2CCOc3ccc(-c4ccc(N)nc4)cc3C2)ccc(S(C)(=O)=O)c1F	1.33743	0	0.2056	-0.2056	TN	2.059	No
+	116	CNCCCN1c2ccccc2CCc2ccccc21	17.3043	1	0.8101	0.1899	TP	0.0177	YES
-	1721	CC1(C)OC2CC(=O)OCC23C1CC(=O)C1(C)C3CCC2(C)C(c3ccoc3)OC(=O)C3OC321	3.0699	0	0.2712	-0.2712	TN	0.0489	YES
+	121	CCN(CC)CCOC(=O)C1(C2CCCCC2)CCCCC1	6.44453	1	0.3989	0.6011	FN	0.0195	YES
+	3172	CCN(CCCOc1ccc2c(Nc3cc(CC(=O)Nc4cccc(F)c4)n[nH]3)ncnc2c1)CCOP(=O)(O)O	0.49991	0	0.1739	-0.1739	TN	1.0671	No
-	129	O=c1c2ccccc2[se]n1-c1ccccc1	14.0157	1	0.6856	0.3144	TP	1.0144	No
+	3484	O=C(O)c1ccc2nc(-c3cc(Cl)cc(Cl)c3)oc2c1	4.13558	0	0.3115	-0.3115	TN	2.0359	No
#	133	CNCCC(Oc1ccc(C(F)(F)F)cc1)c1ccccc1	15.2404	1	0.732	0.268	TP	0.0278	YES
*	324	NNC(=O)c1ccncc1	-1.31771	0	0.105	-0.105	TN	0.0095	YES
#	152	O=C1Nc2ccc(I)cc2C1=Cc1cc(Br)c(O)c(Br)c1	14.1469	1	0.6906	0.3094	TP	0.0559	YES
#	1086	CC(O)(P(=O)(O)O)P(=O)(O)O	-3.45965	0	0.0239	-0.0239	TN	0.0291	YES
#	166	O=S(=O)(c1cccc2c(I)cccc12)N1CCCNCC1	22.5616	1	1.0092	-0.0092	TP	0.0494	YES
*	1832	CCOC(=O)OC(C)OC(=O)C1N2C(=O)C(NC(=O)C(N)c3ccccc3)C2SC1(C)C	-3.8079	0	0.0108	-0.0108	TN	0.036	YES
*	169	CN(C)CCCN1c2ccccc2CCc2ccccc21	17.0527	1	0.8006	0.1994	TP	0.0165	YES
#	3632	Nc1ncnc2c(C3NC(CO)C(O)C3O)c[nH]c12	-10.4269	0	-0.2399	0.2399	TN	0.0327	YES
+	177	CCCc1c(OCCCOc2ccc(OCC(=O)O)cc2)ccc(C(C)=O)c1O	10.6697	1	0.5589	0.4411	TP	0.0209	YES
-	2163	CC1CCCC(O)CCCCCc2cc(O)cc(O)c2C(=O)O1	2.22446	0	0.2392	-0.2392	TN	0.0167	YES
*	181	CN(C)C(=O)C(CCN1CCC(O)(c2ccc(Cl)cc2)CC1)(c1ccccc1)c1ccccc1	8.32154	1	0.47	0.53	FN	0.034	YES
+	1937	CC(=O)OC12COC1CC(O)C1(C)C(=O)C(O)C3=C(C)C(OC(=O)C(O)C(NC(=O)OC(C)(C)C)c4ccccc4)CC(O)(C(OC(=O)c4ccccc4)C21)C3(C)C	1.89777	0	0.2268	-0.2268	TN	0.083	YES
+	185	CCOC(=O)N1CCC(=C2c3ccc(Cl)cc3CCc3cccnc32)CC1	7.79151	1	0.4499	0.5501	FN	0.0365	YES
#	2244	O=C1CCCC2=C1C(c1[nH]ncc1Cl)N=C(Nc1nc3ccccc3o1)N2	4.19317	0	0.3137	-0.3137	TN	0.0556	YES
#	208	CNCCCC12CCC(c3ccccc31)c1ccccc12	11.8926	1	0.6052	0.3948	TP	0.0193	YES
*	3423	CCC1OC(=O)C(C)C(=O)C(C)C(OC2OC(C)CC(N(C)C)C2O)C(C)(OC)CC(C)C(=O)C(C)C2N(CCCCn3cnc(-c4cccnc4)c3)C(=O)OC12C	-0.30771	0	0.1433	-0.1433	TN	0.0897	YES
*	212	COc1ccccc1N1CCN(CC(O)COc2cccc3ccccc23)CC1	10.6681	1	0.5589	0.4411	TP	1.0243	No
+	524	CCCCCCC1C(=O)OC(C)C(NC(=O)c2cccc(NC=O)c2O)C(=O)OC(C)C1OC(=O)CC(C)C	4.47073	0	0.3242	-0.3242	TN	0.036	YES
#	216	COC(=O)C1=C(C)NC(C)=C(C(=O)OCCN(C)Cc2ccccc2)C1c1cccc([N+](=O)[O-])c1	15.0694	1	0.7255	0.2745	TP	0.0338	YES
-	1263	OCCN1CCN(CCCN2c3ccccc3C=Cc3ccccc32)CC1	14.472	0	0.7029	-0.7029	FP	0.0278	YES
-	222	CCN(CC)CC#CCOC(=O)C(O)(c1ccccc1)C1CCCCC1	10.9653	1	0.5701	0.4299	TP	0.0303	YES
-	1273	OCCN1CCN(CCC=C2c3ccccc3Sc3ccc(C(F)(F)F)cc32)CC1	19.4627	0	0.8918	-0.8918	FP	0.0511	YES
*	223	Cc1ccccc1C(OCCN(C)C)c1ccccc1	14.5198	1	0.7047	0.2953	TP	0.009	YES
-	3152	CN1CCC(NC(=O)Nc2ccc(C#N)cc2)CC1c1nc2ccccc2[nH]1	5.07916	0	0.3472	-0.3472	TN	0.0296	YES
+	224	O=c1[nH]c2ccccc2n1CCCN1CCN(C(c2ccccc2)c2ccccc2)CC1	17.0217	1	0.7994	0.2006	TP	1.0255	No
#	1145	CCN(CCO)CCCC(C)Nc1ccnc2cc(Cl)ccc12	8.37256	0	0.4719	-0.4719	TN	0.0218	YES
*	233	CC(CN1c2ccccc2Sc2ccccc21)N(C)C	18.0055	1	0.8367	0.1633	TP	0.0279	YES
+	1972	O=C1NCCN1CCN1CCC(c2cn(-c3ccc(F)cc3)c3ccc(Cl)cc23)CC1	10.4351	0	0.55	-0.55	FP	0.0443	YES
+	235	CCCNCC(O)COc1ccccc1C(=O)CCc1ccccc1	12.7533	1	0.6378	0.3622	TP	0.0147	YES
*	2266	COc1nc(C)cnc1NS(=O)(=O)c1cccnc1-c1ccc(-c2nnco2)cc1	0.65505	0	0.1797	-0.1797	TN	3.0579	No
*	239	OCCN1CCN(CCCN2c3ccccc3Sc3ccc(Cl)cc32)CC1	19.4215	1	0.8903	0.1097	TP	0.0433	YES
-	1671	CC[N+](C)(C)Cc1ccccc1Br	0.31985	0	0.167	-0.167	TN	0.0078	YES
*	240	CN(C)CCCN1c2ccccc2Sc2ccccc21	21.473	1	0.968	0.032	TP	0.0248	YES
+	1304	CC1=C2CC3C(CC=C4CC(O)CCC43C)C2CCC12OC1CC(C)CNC1C2C	-0.0309	0	0.1538	-0.1538	TN	1.0456	No
#	246	CCC(=O)c1ccc2c(c1)N(CCCN(C)C)c1ccccc1S2	18.6176	1	0.8598	0.1402	TP	0.0261	YES
#	215	CC(Cc1ccc(O)c(O)c1)C(C)Cc1ccc(O)c(O)c1	0.75448	0	0.1835	-0.1835	TN	0.0125	YES
*	250	CNCCCC1c2ccccc2C=Cc2ccccc21	17.3865	1	0.8132	0.1868	TP	0.0165	YES
-	98	Clc1ccccc1C(c1ccccc1)(c1ccccc1)n1ccnc1	8.78187	0	0.4874	-0.4874	TN	0.0219	YES
*	252	CN1CCN(CCCN2c3ccccc3Sc3ccc(Cl)cc32)CC1	19.6696	1	0.8997	0.1003	TP	0.0405	YES
-	369	CC(C)(C)CC(C)(C)c1ccc(OCCOCC[N+](C)(C)Cc2ccccc2)cc1	11.3417	0	0.5844	-0.5844	FP	0.0215	YES
#	262	COC(=O)C1C2CC3c4[nH]c5cc(OC)ccc5c4CCN3CC2CC(OC(=O)c2cc(OC)c(OC)c(OC)c2)C1OC	21.3595	1	0.9637	0.0363	TP	0.0679	YES
-	1311	CC(C)CC(NC(=O)C1OC1C(=O)O)C(=O)NCCCCNC(=N)N	3.30194	0	0.28	-0.28	TN	0.0285	YES
+	263	O=C(c1ccc(OCCN2CCCCC2)cc1)c1c(-c2ccc(O)cc2)sc2cc(O)ccc12	19.2356	1	0.8832	0.1168	TP	1.0398	No
*	3769	CCC(=O)OC1(C(=O)COC(C)=O)CCC2C3CC(C)C4=CC(=O)C=CC4(C)C3C(O)CC21C	-1.6584	0	0.0921	-0.0921	TN	0.0487	YES
#	278	Oc1ccc(-c2nc(-c3ccncc3)c(-c3ccc(F)cc3)[nH]2)cc1	19.9427	1	0.91	0.09	TP	0.0406	YES
*	724	CC12C(=O)OC(=O)C1(C)C1CCC2O1	0.27707	0	0.1654	-0.1654	TN	0.0221	YES
-	279	O=C(CCCN1CCC2(CC1)C(=O)NCN2c1ccccc1)c1ccc(F)cc1	11.27	1	0.5816	0.4184	TP	0.0309	YES
-	117	CN(C)CCC=C1c2ccccc2COc2ccccc21	10.0424	0	0.5352	-0.5352	FP	0.0164	YES
+	288	CN1CCN(CCC=C2c3ccccc3Sc3ccc(S(=O)(=O)N(C)C)cc32)CC1	10.1418	1	0.5389	0.4611	TP	0.045	YES
*	1569	CC12CCC(=O)C=C1CCC1C2C(O)CC2(C)C1CCC2(O)C(=O)COP(=O)(O)O	3.97824	0	0.3056	-0.3056	TN	0.044	YES
#	291	OC(CCN1CCCCC1)(c1ccccc1)C1CCCCC1	10.8358	1	0.5652	0.4348	TP	0.0214	YES
*	3844	CNC(C)CC1CCCC1	9.15116	0	0.5014	-0.5014	FP	0.0076	YES
#	294	CN(C)CCCN1c2ccccc2Sc2ccc(C(F)(F)F)cc21	25.9189	1	1.1363	-0.1363	TP	0.0384	YES
-	3215	O=C(Nc1cccnn1)N1CCC(=Cc2cccc(Oc3ccc(C(F)(F)F)cn3)c2)CC1	5.17313	0	0.3508	-0.3508	TN	0.0578	YES
-	295	CC(CN(C)C)CN1c2ccccc2CCc2ccccc21	18.4966	1	0.8553	0.1447	TP	0.0168	YES
#	2419	Cc1cc(O)c2ccccc2c1O	8.55823	0	0.479	-0.479	TN	0.0068	YES
-	297	Nc1nc(N)c2nc(-c3ccccc3)c(N)nc2n1	6.63841	1	0.4063	0.5937	FN	0.0355	YES
-	3016	OC1CCC(Nc2ncc3nc(Nc4c(F)cc(F)cc4F)n(C4CCOC4)c3n2)CC1	8.66668	0	0.4831	-0.4831	TN	0.0683	YES
+	355	CCCCOc1cc(C(=O)NCCN(CC)CC)c2ccccc2n1	13.2554	1	0.6568	0.3432	TP	0.0228	YES
*	3459	CCS(=O)(=O)N1CCC(C(C)n2c(C)c(C(=O)NCc3c(OC)cc(C)[nH]c3=O)c3ccccc32)CC1	-1.70186	0	0.0905	-0.0905	TN	0.0465	YES
+	372	CN(C(=O)CN(CCO)CC(=O)N(C)C(C)(C)Cc1ccccc1)C(C)(C)Cc1ccccc1	9.39616	1	0.5107	0.4893	TP	0.0235	YES
#	2158	CC(C)OC(=O)OCOP(=O)(COC(C)Cn1cnc2c(N)ncnc21)OCOC(=O)OC(C)C	-4.05999	0	0.0012	-0.0012	TN	0.0588	YES
#	380	CN(C)CCCOc1nn(Cc2ccccc2)c2ccccc12	14.1506	1	0.6907	0.3093	TP	0.0203	YES
#	2167	CCN1CCCC1CNC(=O)c1cc(S(=O)(=O)CC)ccc1OC	3.02362	0	0.2694	-0.2694	TN	0.0217	YES
#	417	CN(C)CCC=C1c2ccccc2CSc2ccccc21	14.5724	1	0.7067	0.2933	TP	0.0211	YES
-	2797	Cc1cc(C#N)cc(C)c1Oc1nc(Nc2ccc(C#N)cc2)nc(N)c1Br	7.2907	0	0.431	-0.431	TN	0.0368	YES
#	427	CC(C)N=c1cc2n(-c3ccc(Cl)cc3)c3ccccc3nc-2cc1Nc1ccc(Cl)cc1	19.793	1	0.9043	0.0957	TP	0.0474	YES
+	2845	O=C(Nc1ccccc1)Nc1ccc(-c2ccc(C(=O)C3CCCC3C(=O)O)cc2)cc1	5.86306	0	0.3769	-0.3769	TN	0.039	YES
#	434	CCCCc1cc2ccccc2c(OCCN(C)C)n1	13.3393	1	0.66	0.34	TP	0.0136	YES
-	2735	O=C(c1ccc(C(=O)N2CCC(N3CCCC3)CC2)c(Nc2ccccc2)c1)N1CCC(N2CCCC2)CC1	6.89875	0	0.4161	-0.4161	TN	0.0496	YES
+	435	CCN(CC)CCNc1ccc(CO)c2sc3ccccc3c(=O)c12	16.4641	1	0.7783	0.2217	TP	0.0375	YES
-	1034	Oc1cc2c(cc1O)C1c3ccc(O)c(O)c3OCC1(O)C2	1.98621	0	0.2301	-0.2301	TN	0.0293	YES
#	438	CC(=O)c1ccc2c(c1)N(CCCN(C)C)c1ccccc1S2	17.747	1	0.8269	0.1731	TP	0.0255	YES
-	1816	COc1cc(C2c3cc4c(cc3C(OC3OC5COC(C)OC5C(O)C3O)C3COC(=O)C23)OCO4)cc(OC)c1O	1.88088	0	0.2262	-0.2262	TN	3.0901	No
#	442	CC(=O)c1ccc2c(c1)N(CCCN1CCC(CCO)CC1)c1ccccc1S2	14.9588	1	0.7213	0.2787	TP	0.0343	YES
*	197	Cc1[nH]c(=O)c(C#N)cc1-c1ccncc1	3.09843	0	0.2722	-0.2722	TN	0.0262	YES
*	452	CN1CCCC1CCOC(C)(c1ccccc1)c1ccc(Cl)cc1	14.0534	1	0.687	0.313	TP	0.0233	YES
+	2460	CCC1C2CC3C4N(C)c5ccccc5C45CC(C2C5O)N3C1O	-0.06887	0	0.1523	-0.1523	TN	7.0618	No
+	508	CCN(CC)Cc1cc(Nc2ccnc3cc(Cl)ccc23)ccc1O	18.8662	1	0.8693	0.1307	TP	0.0292	YES
+	3770	CC(=O)C1(O)CCC2C3CCC4=CC(=O)CCC4C3CCC21C	6.01496	0	0.3827	-0.3827	TN	0.0401	YES
-	510	COc1cc(C=CC(=O)C=C(O)C=Cc2ccc(O)c(OC)c2)ccc1O	3.57161	1	0.2902	0.7098	FN	0.018	YES
#	1960	CCOC(=O)C(CCc1ccccc1)NC(C)C(=O)N(CC(=O)O)C1Cc2ccccc2C1	7.63341	0	0.444	-0.444	TN	0.0283	YES
*	532	COc1cc2c3cc1Oc1c(OC)c(OC)cc4c1C(Cc1ccc(O)c(c1)Oc1ccc(cc1)CC3N(C)CC2)N(C)CC4	18.3299	1	0.8489	0.1511	TP	0.0478	YES
#	244	CCC1(c2ccccc2)C(=O)NCNC1=O	2.46487	0	0.2483	-0.2483	TN	0.0203	YES
*	533	COc1ccc2cc1Oc1ccc(cc1)CC1c3cc(c(OC)cc3CCN1C)Oc1c(OC)c(OC)cc3c1C(C2)N(C)CC3	16.4341	1	0.7772	0.2228	TP	0.0428	YES
+	968	NC(Cc1cc(I)c(Oc2cc(I)c(O)c(I)c2)c(I)c1)C(=O)O	5.87114	0	0.3772	-0.3772	TN	0.1161	YES
#	538	Fc1ccc(C(c2ccc(F)cc2)N2CCN(CC=Cc3ccccc3)CC2)cc1	13.3437	1	0.6602	0.3398	TP	0.0228	YES
*	491	COc1ccc2nc(S(=O)Cc3ncc(C)c(OC)c3C)[nH]c2c1	-7.66998	0	-0.1355	0.1355	TN	0.0267	YES
#	550	COc1cc2nc(N3CCN(C(=O)C4COc5ccccc5O4)CC3)nc(N)c2cc1OC	13.9896	1	0.6846	0.3154	TP	0.0667	YES
-	3681	COc1cc(O)c(C(=O)Nc2nc(C(=O)NCCN(C(C)C)C(C)C)cs2)cc1OC	6.52739	0	0.4021	-0.4021	TN	0.0425	YES
-	582	C1CCC(C(CC2CCCCN2)C2CCCCC2)CC1	17.2979	1	0.8099	0.1901	TP	0.0181	YES
+	898	CCN(CC)CCCC(C)Nc1nc(C)cc(Nc2ccc3nc(C)cc(N)c3c2)n1	5.82829	0	0.3756	-0.3756	TN	0.0338	YES
*	584	CN1CCCN(C(c2ccccc2)c2ccc(Cl)cc2)CC1	10.4095	1	0.5491	0.4509	TP	0.0163	YES
-	1259	O=C1OC2(c3ccc(O)cc3Oc3cc(O)ccc32)c2ccccc21	12.4428	0	0.6261	-0.6261	FP	0.0328	YES
-	592	CCN(CCCc1ccccc1)CCCc1ccccc1	19.1288	1	0.8792	0.1208	TP	0.0114	YES
-	1670	CCC(C)C1OC2(C=CC1C)CC1CC(CC=C(C)C(OC3CC(OC)C(OC4CC(OC)C(O)C(C)O4)C(C)O3)C(C)C=CC=C3COC4C(O)C(C)=CC(C(=O)O1)C34O)O2	-0.1467	0	0.1494	-0.1494	TN	1.0915	No
#	596	CN1CCN(C2=Nc3ccccc3Oc3ccc(Cl)cc32)CC1	11.7127	1	0.5984	0.4016	TP	0.0382	YES
-	3431	CC(C)C(NC(=O)c1ccc2ccccc2n1)C(=O)NC(CC(=O)O)C(=O)COc1c(F)cccc1F	8.23108	0	0.4666	-0.4666	TN	2.0329	No
-	597	O=C(c1ccc(F)cc1)C1CCN(CCn2c(=O)[nH]c3ccccc3c2=O)CC1	12.4354	1	0.6258	0.3742	TP	0.0388	YES
#	3357	CCCCOC(=O)NS(=O)(=O)c1sc(CC(C)C)cc1-c1ccc(Cn2ccnc2)cc1	2.67753	0	0.2563	-0.2563	TN	0.0558	YES
-	605	CCCCCC(=O)OC1(C(C)=O)CCC2C3CCC4=CC(=O)CCC4(C)C3CCC21C	5.58099	1	0.3662	0.6338	FN	0.0439	YES
+	2994	CN1CCN(c2ncc(-c3cc(Cl)cc(Cl)c3Cl)c(N)n2)CC1	2.68864	0	0.2567	-0.2567	TN	0.0503	YES
-	681	C=C1C(=O)OC2C1CCC(C)=CCCC1(C)OC21	7.07554	1	0.4228	0.5772	FN	0.0222	YES
*	899	COc1cc2c(cc1OC)C1CC(=O)C(CC(C)C)CN1CC2	9.34752	0	0.5089	-0.5089	FP	0.0162	YES
*	687	CNCCCCOc1ccccc1Cc1ccccc1	11.5396	1	0.5919	0.4081	TP	0.0122	YES
-	3854	OC(CCN1CCCCC1)(c1ccccc1)C1CCCC1	9.96521	0	0.5322	-0.5322	FP	0.0207	YES
*	693	CCC(=C(c1ccccc1)c1ccc(OCCN(C)C)cc1)c1ccccc1	22.5477	1	1.0086	-0.0086	TP	0.0213	YES
+	1826	CN(C)C(=O)Oc1cc(OC(=O)N(C)C)cc(C(O)CNC(C)(C)C)c1	3.53483	0	0.2888	-0.2888	TN	0.0224	YES
-	695	Clc1ccc2c(c1)N=C(N1CCNCC1)c1ccccc1N2	16.5023	1	0.7797	0.2203	TP	0.0308	YES
*	396	O=c1c(O)c(-c2ccc(O)cc2)oc2cc(O)cc(O)c12	0.70586	0	0.1817	-0.1817	TN	2.0233	No
*	776	CCC(=C(CC)c1ccc(O)cc1)c1ccc(O)cc1	9.83504	1	0.5273	0.4727	TP	0.0148	YES
+	814	O=C1C2CC=CCC2C(=O)N1SC(Cl)(Cl)Cl	-4.35748	0	-0.01	0.01	TN	5.0221	No
+	778	CCC1OC(=O)C(C)C(OC2CC(C)(OC)C(O)C(C)O2)C(C)C(OC2OC(C)CC(N(C)C)C2O)C(C)(O)CC(C)CN(C)C(C)C(O)C1(C)O	20.2179	1	0.9204	0.0796	TP	0.0556	YES
-	2334	CC(C)NCCCC1(C(N)=O)c2ccccc2-c2ccccc21	7.756	0	0.4486	-0.4486	TN	0.0251	YES
+	784	CC(=O)Oc1ccccc1C(=O)Nc1ncc([N+](=O)[O-])s1	6.19607	1	0.3895	0.6105	FN	0.0318	YES
#	837	c1ccc2sc(SSc3nc4ccccc4s3)nc2c1	3.31078	0	0.2803	-0.2803	TN	0.047	YES
#	785	Cc1c(O)cccc1C(=O)NC(CSc1ccccc1)C(O)CN1CC2CCCCC2CC1C(=O)NC(C)(C)C	24.8702	1	1.0966	-0.0966	TP	0.036	YES
-	2901	O=C(Nc1ncc(SCCN2CCCC2)s1)C1(c2ccc(S(=O)(=O)C3CC3)cc2)CC1C1CCCCC1	10.9154	0	0.5682	-0.5682	FP	2.0687	No
-	836	C=CC1CN2CCC1CC2C(O)c1ccnc2ccc(OC)cc12	8.82977	1	0.4893	0.5107	FN	0.0186	YES
+	3412	COc1cc(Br)c(C[N+]2(CCOCCC3CCC4CC3C4(C)C)CCOCC2)cc1OC	-2.06687	0	0.0767	-0.0767	TN	0.0434	YES
-	858	Cc1ccc(-c2cc(C(F)(F)F)nn2-c2ccc(S(N)(=O)=O)cc2)cc1	12.6779	1	0.6349	0.3651	TP	0.0504	YES
*	666	CCCCN1CC(O)C(O)C(O)C1CO	0.64492	0	0.1794	-0.1794	TN	0.0103	YES
*	966	CCCCC(CC)CN1CN(CC(CC)CCCC)CC(C)(N)C1	9.29676	1	0.5069	0.4931	TP	0.0179	YES
*	1933	CC(=C(CCO)SSC(CCO)=C(C)N(C=O)Cc1cnc(C)nc1N)N(C=O)Cc1cnc(C)nc1N	2.07844	0	0.2336	-0.2336	TN	0.0421	YES
+	994	N#Cc1ccc2c(c1)N(CCCN1CCC(O)CC1)c1ccccc1S2	10.8982	1	0.5676	0.4324	TP	0.0365	YES
#	3216	Cc1nc(N(C)C(=O)Cc2ccc(-c3ccccn3)cc2)sc1S(N)(=O)=O	11.5162	0	0.591	-0.591	FP	0.0478	YES
+	1037	C=C1CCC2C(C)(CO)C(O)CCC2(C)C1CC=C1C(=O)OCC1O	13.4671	1	0.6648	0.3352	TP	0.0239	YES
*	3410	OCC1OC(n2cnc3c2NC=NCC3O)CC1O	-11.336	0	-0.2743	0.2743	TN	0.0398	YES
+	1052	O=C(NC(=O)c1c(F)cccc1F)Nc1cc(Cl)c(OC(F)(F)C(F)C(F)(F)F)cc1Cl	16.7525	1	0.7892	0.2108	TP	4.0551	No
+	3059	CC1(C)C(=CC=CC=CC=CC2=[N+](CCCCS(=O)(=O)O)c3ccc4ccccc4c3C2(C)C)N(CCCCS(=O)(=O)O)c2ccc3ccccc3c21	-13.439	0	-0.3539	0.3539	TN	0.0844	YES
#	1075	Clc1ccc2c(c1)CCc1cccnc1C2=C1CCNCC1	14.6119	1	0.7082	0.2918	TP	0.0306	YES
-	2417	Cc1cc2c(cc1CC(=O)c1sccc1S(=O)(=O)Nc1onc(C)c1Cl)OCO2	4.97211	0	0.3432	-0.3432	TN	0.0511	YES
-	1080	O=C1Nc2ccc(Cl)cc2C(C#CC2CC2)(C(F)(F)F)O1	18.6319	1	0.8604	0.1396	TP	1.0333	No
#	2425	CNC(=O)c1c(I)c(NC(C)=O)c(I)c(C(=O)O)c1I	5.46891	0	0.362	-0.362	TN	0.0664	YES
*	1133	Cc1ccc(NC(=O)c2ccc(CN3CCN(C)CC3)cc2)cc1Nc1nccc(-c2cccnc2)n1	20.6128	1	0.9354	0.0646	TP	0.0526	YES
-	1612	CN(C)C(=O)COC(=O)Cc1ccc(OC(=O)c2ccc(NC(=N)N)cc2)cc1	2.29916	0	0.242	-0.242	TN	0.0251	YES
+	1144	CC(C)=CCOc1ccc(C=CC(=O)c2ccc(OCC=C(C)C)cc2OCC(=O)O)cc1	4.18276	1	0.3133	0.6867	FN	0.0305	YES
#	563	CN1CCCN=C1COC(=O)C(O)(c1ccccc1)C1CCCCC1	2.89428	0	0.2645	-0.2645	TN	0.0288	YES
#	1158	O=C1CCc2ccc(OCCCCN3CCN(c4cccc(Cl)c4Cl)CC3)cc2N1	21.1496	1	0.9557	0.0443	TP	0.0454	YES
-	555	COc1ccc(C=CC(=O)Nc2ccccc2C(=O)O)cc1OC	-0.65505	0	0.1301	-0.1301	TN	0.0172	YES
#	1163	Cc1ccc(O)c(C(CCN(C(C)C)C(C)C)c2ccccc2)c1	14.5622	1	0.7063	0.2937	TP	0.0118	YES
+	3706	COc1ccc(Oc2cc(NCCC(F)(F)F)c3ncc(-c4ccc(C(=O)NC5CC5)c(C)c4)n3n2)c(F)c1F	0.68993	0	0.1811	-0.1811	TN	4.0913	No
*	1167	CC1(CN2CCC(n3c(=O)[nH]c4ccccc43)CC2)OCc2ccccc2-n2cccc21	14.147	1	0.6906	0.3094	TP	0.0504	YES
+	889	CC1CC(OC(=O)c2ccccc2O)CC(C)(C)C1	9.29053	0	0.5067	-0.5067	FP	0.0178	YES
*	1169	O=C(C=Cc1ccccc1)NC(NC(=S)Nc1cccc2cccnc12)C(Cl)(Cl)Cl	29.7871	1	1.2827	-0.2827	TP	3.0371	No
*	1056	O=c1c(-c2ccc(O)cc2)coc2c(C3OC(CO)C(O)C(O)C3O)c(O)ccc12	-5.45003	0	-0.0514	0.0514	TN	1.0398	No
-	1172	COc1cc2c(Nc3ccc(NC(=O)c4ccccc4)cc3)ncnc2cc1OCCCN1CCOCC1	5.73328	1	0.372	0.628	FN	0.0499	YES
-	614	CCOC(=O)C(CCc1ccccc1)NC(C)C(=O)N1CCCC1C(=O)O	11.1117	0	0.5757	-0.5757	FP	0.0248	YES
+	1239	O=[N+]([O-])c1ccc(O)c2ncccc12	8.57221	1	0.4795	0.5205	FN	0.0124	YES
-	3531	CCCCCC(O)C=CC1C(O)CC(=O)C1CCCCCCC(=O)O	4.21443	0	0.3145	-0.3145	TN	0.0185	YES
+	1254	COc1ccc2cc1Oc1ccc(cc1)CC1c3c(cc4c(c3Oc3cc5c(cc3OC)CCN(C)C5C2)OCO4)CCN1C	22.203	1	0.9956	0.0044	TP	1.0896	No
-	3025	c1ccc(-c2oc3ncnc(NCC4CCCO4)c3c2-c2ccccc2)cc1	4.96801	0	0.343	-0.343	TN	3.0442	No
-	1260	CCCCC(C=O)NC(=O)C(CC(C)C)NC(=O)C(CC(C)C)NC(C)=O	6.03688	1	0.3835	0.6165	FN	0.0201	YES
+	2685	NCCNc1ccc(NCCN)c2c1C(=O)c1ccncc1C2=O	5.84166	0	0.3761	-0.3761	TN	0.0357	YES
*	1264	O=S(=O)(NCCNCC=Cc1ccc(Br)cc1)c1cccc2cnccc12	25.2154	1	1.1097	-0.1097	TP	0.0361	YES
+	3241	CC(C)C(=O)OCC1OC(n2ccc(N)nc2=O)C(C)(F)C1OC(=O)C(C)C	7.2871	0	0.4308	-0.4308	TN	0.0427	YES
#	1272	COCCOC(=O)C1=C(C)NC(C)=C(C(=O)OCC=Cc2ccccc2)C1c1cccc([N+](=O)[O-])c1	15.5875	1	0.7451	0.2549	TP	0.0369	YES
#	3909	C=CC=CCC1=C(C)C(OC(=O)C2C(C=C(C)C(=O)OC)C2(C)C)CC1=O	1.8512	0	0.225	-0.225	TN	0.03	YES
+	1277	CC(C)c1ccc2c(c1)c(SC(C)(C)C)c(CC(C)(C)C(=O)O)n2Cc1ccc(Cl)cc1	9.60714	1	0.5187	0.4813	TP	1.0402	No
-	3116	CNC(=O)C(NC(=O)C(CC(C)C)C(O)C(=O)NO)C(C)(C)C	8.86899	0	0.4907	-0.4907	TN	1.0194	No
#	1290	CN1CCCCC1CCN1c2ccccc2Sc2ccc(S(C)=O)cc21	20.444	1	0.929	0.071	TP	0.0355	YES
+	3680	CC(C)(CO)n1cc(C(=O)c2cncc(NC(=O)Cc3ccc(Cl)cn3)c2)c2cnc(N)nc21	-7.11648	0	-0.1145	0.1145	TN	0.0411	YES
+	1292	CN1CCC(=C2c3ccccc3CCc3sccc32)CC1	15.7829	1	0.7525	0.2475	TP	2.0257	No
-	3014	N#CC(c1ccnc(NCCc2cccnc2)n1)c1nc2ccccc2s1	3.17959	0	0.2753	-0.2753	TN	1.0467	No
+	1299	CCCCC(C=O)NC(=O)C(CC(C)C)NC(=O)OCc1ccccc1	5.3701	1	0.3583	0.6417	FN	0.0184	YES
*	1909	CCCCCCCCCCOc1cc2c(=O)c(C(=O)OCC)c[nH]c2cc1OCC	2.78495	0	0.2604	-0.2604	TN	0.0218	YES
*	1306	COc1ccc2c(c1)c(C1=C(c3c[nH]c4ccccc34)C(=O)NC1=O)cn2CCCN(C)C	12.3198	1	0.6214	0.3786	TP	0.0502	YES
#	1328	O=[N+]([O-])C(Br)(CO)CO	2.257	0	0.2404	-0.2404	TN	0.009	YES
+	1332	CC(C)(C)CC(C)(C)c1ccc(O)cc1	7.29868	1	0.4313	0.5687	FN	0.0088	YES
-	2618	CC(C(=O)O)c1ccc2c(c1)CC(=O)c1ccccc1S2	10.3334	0	0.5462	-0.5462	FP	0.0232	YES
#	1349	O[n+]1ccccc1SSc1cccc[n+]1O	18.1345	1	0.8416	0.1584	TP	0.0183	YES
*	1472	Nc1ncn(C2CC(O)C(CO)O2)c(=O)n1	-2.48188	0	0.061	-0.061	TN	0.0271	YES
*	1360	COc1ccc(CN2CCN(C(c3ccc(F)cc3)c3ccc(F)cc3)CC2)c(OC)c1OC	14.4675	1	0.7027	0.2973	TP	0.0297	YES
-	3067	CCCc1cc(C)[nH]c(=O)c1CNC(=O)c1cc(-c2ccc(N3CCN(C(C)C)CC3)nc2)cc2c1cnn2C(C)C	15.713	0	0.7499	-0.7499	FP	0.0619	YES
+	1372	CNCCC(Oc1cccc2ccccc12)c1cccs1	17.8147	1	0.8294	0.1706	TP	0.0211	YES
-	2798	Cn1cc(-c2ccc3c(c2)CCN3C(=O)Cc2cccc(C(F)(F)F)c2)c2c(N)ncnc21	1.193	0	0.2001	-0.2001	TN	0.0658	YES
+	1381	Cc1cccc(C)c1OCC(=O)NC(Cc1ccccc1)C(O)CC(Cc1ccccc1)NC(=O)C(C(C)C)N1CCCNC1=O	16.2124	1	0.7688	0.2312	TP	0.0395	YES
-	2492	COc1cc(OC2CCN(C)CC2)ccc1Nc1ncc2c(n1)n(C1CCCC1)c(=O)n2C	11.8306	0	0.6029	-0.6029	FP	0.0505	YES
-	1421	CCOC(=O)C(CCc1ccccc1)NC1CCc2ccccc2N(CC(=O)O)C1=O	14.7253	1	0.7125	0.2875	TP	0.0297	YES
-	1853	CC(=O)CC(c1ccc([N+](=O)[O-])cc1)c1c(O)c2ccccc2oc1=O	6.35527	0	0.3956	-0.3956	TN	3.0212	No
+	1425	NC(=O)c1ccc2nc(-c3ccc(Oc4ccc(Cl)cc4)cc3)[nH]c2c1	16.089	1	0.7641	0.2359	TP	0.0452	YES
+	2206	COC(C(=O)C(O)C(C)O)C1Cc2cc3cc(OC4CC(OC5CC(O)C(OC)C(C)O5)C(OC(C)=O)C(C)O4)c(C)c(O)c3c(O)c2C(=O)C1OC1CC(OC2CC(OC3CC(C)(O)C(OC(C)=O)C(C)O3)C(O)C(C)O2)C(O)C(C)O1	-8.60886	0	-0.171	0.171	TN	3.1032	No
#	1442	COc1cccc2c1CCCC2CCCN1CCN(C2CCCCC2)CC1	16.0625	1	0.7631	0.2369	TP	0.0211	YES
+	2911	CCn1cc(-c2ccnc3[nH]c(-c4cccc(CN(C)C)c4)cc23)c(-c2ccc(NC(=O)N(C)C)cc2)n1	10.2766	0	0.544	-0.544	FP	0.078	YES
-	1445	Fc1ccc(Cl)cc1-c1nc(Nc2ccncc2)c2nccnc2n1	14.3778	1	0.6993	0.3007	TP	0.0467	YES
#	1948	CCOC(=O)C(CCc1ccccc1)NC(C)C(=O)N1C(=O)N(C)CC1C(=O)O	5.98413	0	0.3815	-0.3815	TN	0.028	YES
*	1446	Cc1[nH]c(C=C2C(=O)Nc3ccc(S(=O)(=O)N(C)c4cccc(Cl)c4)cc32)c(C)c1C(=O)N1CCN(C)CC1	2.60201	1	0.2535	0.7465	FN	0.0565	YES
*	1944	CC(C)(C)c1ccc2c(S(=O)(=O)O)c(C(C)(C)C)ccc2c1	4.52098	0	0.3261	-0.3261	TN	0.0189	YES
#	1452	CCOC(=O)C1C(=COCCN)NC(C)=C(C(=O)OC)C1c1ccccc1Cl	16.9635	1	0.7972	0.2028	TP	0.0319	YES
#	2665	CCCC(NC(C)C(=O)N1C(C(=O)O)CC2CCCCC21)C(=O)OCC	-2.71524	0	0.0521	-0.0521	TN	0.0261	YES
-	1502	O=[N+]([O-])c1cc(I)c(O)c(I)c1	13.0624	1	0.6495	0.3505	TP	0.0536	YES
#	2026	CC(C)(C)CC(=O)OCC(=O)C12OC(C)(C)OC1CC1C3CCC4=CC(=O)C=CC4(C)C3(F)C(O)CC12C	-10.3873	0	-0.2383	0.2383	TN	0.0559	YES
+	1531	CCOC(=O)C1OC1C(=O)NC(CC(C)C)C(=O)NCCC(C)C	5.83752	1	0.376	0.624	FN	0.0219	YES
#	2148	CCCCCCC(CCC)C(=O)O	3.61098	0	0.2917	-0.2917	TN	0.0081	YES
-	1558	C#CC1(O)CCC2C3CCC4=CCCCC4C3C(=C)CC21CC	13.1501	1	0.6528	0.3472	TP	0.0465	YES
#	388	CN1CCN(C(c2ccccc2)c2ccccc2)CC1	9.36734	0	0.5096	-0.5096	FP	0.0122	YES
#	1570	C=C1C(=CC=C2CCCC3(C)C2CCC3C(C)C=CC(O)C2CC2)CC(O)CC1O	9.97154	1	0.5325	0.4675	TP	0.0316	YES
+	217	COC(=O)C1=C(C)NC(C)=C(C(=O)OC)C1c1ccccc1[N+](=O)[O-]	9.48945	0	0.5142	-0.5142	FP	0.025	YES
*	1585	CNC(=O)c1cc(Oc2ccc(NC(=O)Nc3ccc(Cl)c(C(F)(F)F)c3)cc2)ccn1	8.28496	1	0.4686	0.5314	FN	0.0462	YES
-	3527	CCc1cc(C(N)=O)ccc1-n1nc(C(C)C)c2c(-n3cnc(-c4cnn(C)c4)c3)ccnc21	3.50908	0	0.2878	-0.2878	TN	0.0701	YES
*	1586	COc1cccc(CCc2ccccc2OCC(CN(C)C)OC(=O)CCC(=O)O)c1	11.7317	1	0.5991	0.4009	TP	0.0232	YES
-	2821	CCC(NC(=O)C(C)NC)C(=O)N1CC(O)CC1Cc1c(-c2[nH]c3cc(F)ccc3c2CC2CC(O)CN2C(=O)C(CC)NC(=O)C(C)NC)[nH]c2cc(F)ccc12	8.68301	0	0.4837	-0.4837	TN	0.0502	YES
*	1589	COC(=O)C1=C(C)NC(C)=C(C(=O)OC(C)(C)CN(C)CCC(c2ccccc2)c2ccccc2)C1c1cccc([N+](=O)[O-])c1	22.6742	1	1.0134	-0.0134	TP	0.0374	YES
-	711	CCOC(=O)C1=C(C)NC(=S)NC1c1cccc(O)c1	9.54914	0	0.5165	-0.5165	FP	0.0282	YES
*	1590	COC(=O)C1=C(C)NC(C)=C(C(=O)OCCN2CCN(C(c3ccccc3)c3ccccc3)CC2)C1c1cccc([N+](=O)[O-])c1	21.4311	1	0.9664	0.0336	TP	0.0452	YES
*	1560	O=C(O)c1cc(=O)c2c3nc4ccccc4oc-3cc(=O)c2[nH]1	-6.7823	0	-0.1019	0.1019	TN	0.0271	YES
*	1598	CS(=O)(=O)CCNCc1ccc(-c2ccc3ncnc(Nc4ccc(OCc5cccc(F)c5)c(Cl)c4)c3c2)o1	14.2375	1	0.694	0.306	TP	1.0834	No
#	3608	COc1cc(C(CC(=O)O)c2ccc(C)c(CN3CC(C)Oc4ccccc4S3(=O)=O)c2)cc2nnn(C)c12	1.31128	0	0.2046	-0.2046	TN	0.0586	YES
-	1638	CCN(CC)CCCN(c1ccccc1)C1Cc2ccccc2C1	13.8769	1	0.6803	0.3197	TP	0.0174	YES
#	1527	O=S(=O)(O)CC(S)CS	5.12623	0	0.349	-0.349	TN	0.0175	YES
*	1642	CC(C)c1onc(-c2c(Cl)cccc2Cl)c1COc1ccc(C=Cc2cccc(C(=O)O)c2)c(Cl)c1	8.69853	1	0.4843	0.5157	FN	3.0352	No
*	370	NC(=O)Nc1ccc([As](=O)(O)O)cc1	-7.45581	0	-0.1274	0.1274	TN	0.0142	YES
#	1646	COc1cc(C(C)C)c2c(c1)S(=O)(=O)N(COc1cc(=O)n3cccc(OCCN4CCCCC4)c3n1)C2=O	10.7169	1	0.5607	0.4393	TP	0.0545	YES
-	886	CN(CCCl)CCCl	13.1823	0	0.654	-0.654	FP	3.0073	No
*	1647	O=C(c1ccc(Nc2nccc(-c3cc4ccccc4s3)n2)cc1)N1CCC(N2CCCC2)CC1	14.4091	1	0.7005	0.2995	TP	0.0607	YES
-	3123	CN(C)C(=O)Nc1cccc(-c2ccc(N(C)C)cc2)c1	7.34327	0	0.433	-0.433	TN	0.0209	YES
#	1682	N#CC(c1ccc(Cl)cc1)c1c(Cl)cc(-n2ncc(=O)[nH]c2=O)cc1Cl	25.1836	1	1.1084	-0.1084	TP	0.0536	YES
*	3490	C=C1CCCC2(C)C=C3OC(=O)C(C)=C3CC12	-7.80533	0	-0.1406	0.1406	TN	0.0291	YES
#	1691	CN1CCCC(n2nc(Cc3ccc(Cl)cc3)c3ccccc3c2=O)CC1	16.9567	1	0.797	0.203	TP	0.0387	YES
-	1547	O=C(OC1CC2CCC(C1)[N+]21CCCC1)C(O)(c1ccccc1)c1ccccc1	7.07417	0	0.4228	-0.4228	TN	0.031	YES
-	1699	Clc1ccc(C(OCCN2CCCCC2)c2ccccc2)cc1	12.0841	1	0.6125	0.3875	TP	0.0145	YES
+	3831	CC(NC(=O)C1NCCC1O)c1ccc(-c2noc(CCC3CCCC3)n2)cc1	9.96148	0	0.5321	-0.5321	FP	0.0487	YES
*	1704	CCN(CC)CCOC(=O)C(Cc1cccc2ccccc12)CC1CCCO1	16.554	1	0.7817	0.2183	TP	0.02	YES
+	2422	C#CC(O)(C=CCl)CC	2.10179	0	0.2345	-0.2345	TN	2.0125	No
+	1726	CN(Cc1cc(Br)cc(Br)c1N)C1CCCCC1	13.8749	1	0.6803	0.3197	TP	0.0237	YES
+	2564	OCC(Cc1ccccc1)Nc1nc(Oc2ccc3c(c2)CCC3)nc2c1ncn2Cc1ccc(-c2ccccc2)cc1	7.54599	0	0.4406	-0.4406	TN	1.0572	No
*	1738	CC(CN(C)C)CN1c2ccccc2Sc2ccccc21	22.9169	1	1.0226	-0.0226	TP	0.0252	YES
+	1384	CC(C)=CCC1C(=O)N(c2ccccc2)N(c2ccccc2)C1=O	2.89718	0	0.2646	-0.2646	TN	0.0241	YES
#	1754	CCN(CC)C(C)CN1c2ccccc2Sc2ccccc21	23.0984	1	1.0295	-0.0295	TP	0.0261	YES
-	2179	COc1ccc(C(=O)Nc2ccccc2CCC2CCCCN2C)cc1	10.1486	0	0.5392	-0.5392	FP	0.0183	YES
*	1798	COc1ccc2c(c1)N(CC(C)CN(C)C)c1ccccc1S2	19.7513	1	0.9028	0.0972	TP	0.0248	YES
-	3784	N#Cc1c(N2CC3NCCOC3C2)c(F)cc2c(=O)c(C(=O)O)cn(C3CC3)c12	-0.52079	0	0.1352	-0.1352	TN	0.0557	YES
+	1800	CN1CCN(C(c2ccccc2)c2ccc(Cl)cc2)CC1	9.53895	1	0.5161	0.4839	TP	0.0157	YES
-	394	O=c1cccc2n1CC1CNCC2C1	12.014	0	0.6098	-0.6098	FP	1.0191	No
#	1830	CC1CC2C3CCC4=CC(=O)C=CC4(C)C3(Cl)C(O)CC2(C)C1(OC(=O)c1ccco1)C(=O)CCl	20.2131	1	0.9203	0.0797	TP	0.0503	YES
-	1380	Cc1c(C(=O)NN2CCCCC2)nn(-c2ccc(Cl)cc2Cl)c1-c1ccc(Cl)cc1	1.51545	0	0.2123	-0.2123	TN	3.043	No
-	1846	CN1CCN(CCCN2c3ccccc3Sc3ccc(S(=O)(=O)N(C)C)cc32)CC1	14.3748	1	0.6992	0.3008	TP	0.0473	YES
#	3294	CCOc1nc2cccc(C(=O)O)c2n1Cc1ccc(-c2ccccc2-c2nc(=O)o[nH]2)cc1	4.72587	0	0.3339	-0.3339	TN	0.0512	YES
*	1854	C#CC1(O)CCC2C3CCC4=Cc5oncc5CC4(C)C3CCC21C	18.0361	1	0.8378	0.1622	TP	1.0584	No
+	193	Cc1cccc(C)c1OCC(C)N	5.27319	0	0.3546	-0.3546	TN	0.0065	YES
-	1857	C#CC1(O)CCC2C3CCC4=CCCCC4C3CCC21C	12.5278	1	0.6293	0.3707	TP	0.0424	YES
#	3492	Nc1n[n+](O)c2ccccc2[n+]1O	5.5409	0	0.3647	-0.3647	TN	0.0125	YES
+	1864	CCC1CN2CCC1CC2C(O)c1ccnc2ccc(OC)cc12	12.1186	1	0.6138	0.3862	TP	0.0182	YES
+	1536	FC(F)OC(F)(F)C(F)Cl	5.65889	0	0.3692	-0.3692	TN	2.0245	No
#	1898	CN(C)CCC=C1c2ccccc2C(C)(C)c2ccccc21	12.6251	1	0.633	0.367	TP	0.0172	YES
#	1408	CC1CCc2c(N3CCC(O)CC3)c(F)cc3c(=O)c(C(=O)O)cn1c23	2.46944	0	0.2484	-0.2484	TN	0.0415	YES
#	1904	Cc1cc(O)c2c(c1)OC1(C)CCC3C(C)(C)CCCC34COC2C14	15.1633	1	0.7291	0.2709	TP	0.0336	YES
*	3234	CCC(C)CC(C)CCCCCCCCC(=O)NC1CC(O)C(NCCN)NC(=O)C2C(O)CCN2C(=O)C(C(O)CCN)NC(=O)C(C(O)C(O)c2ccc(O)cc2)NC(=O)C2CC(O)CN2C(=O)C(C(C)O)NC1=O	7.56233	0	0.4413	-0.4413	TN	0.0641	YES
#	1907	CCCOC(C(=O)OC1CCN(C)CC1)(c1ccccc1)c1ccccc1	14.0737	1	0.6878	0.3122	TP	0.0248	YES
#	2023	CCOC(Cc1ccc(OCCc2ccc(OS(C)(=O)=O)cc2)cc1)C(=O)O	9.3555	0	0.5092	-0.5092	FP	0.0262	YES
*	1930	CC(CN(C)C)CN1c2ccccc2Sc2ccc(C(F)(F)F)cc21	27.3628	1	1.191	-0.191	TP	0.0387	YES
-	1494	CCCCCCCCCCC(CO)CCCCCCCC	14.7093	0	0.7119	-0.7119	FP	0.0117	YES
#	1983	CC(C(O)c1ccccc1)N(C)CCOC(c1ccccc1)c1ccccc1	19.4279	1	0.8905	0.1095	TP	0.018	YES
+	567	N=C(N)NS(=O)(=O)c1ccc(N)cc1	-3.3999	0	0.0262	-0.0262	TN	0.0243	YES
#	2007	Cc1c(-c2ccc(O)cc2)n(Cc2ccc(OCCN3CCCCCC3)cc2)c2ccc(O)cc12	22.6697	1	1.0133	-0.0133	TP	0.0456	YES
+	266	COc1ccc(C2CNC(=O)C2)cc1OC1CCCC1	6.48072	0	0.4003	-0.4003	TN	0.0152	YES
#	2022	CN(C)CCOC1=Cc2ccccc2Sc2ccc(Cl)cc21	20.0104	1	0.9126	0.0874	TP	0.0332	YES
*	1039	C[n+]1cccc(C(=O)O)c1	2.83495	0	0.2623	-0.2623	TN	0.0073	YES
+	2024	Cn1nnnc1Sc1ncnc2scc(-c3cccc(S(C)(=O)=O)c3)c12	20.8778	1	0.9454	0.0546	TP	1.0738	No
#	3942	CC(N)C(=O)NC(CO)C(=O)NC(C(=O)NC(C(=O)NC(C(=O)NC(CC(N)=O)C(=O)NC(Cc1ccc(O)cc1)C(=O)NC(C(N)=O)C(C)O)C(C)O)C(C)O)C(C)O	-10.2989	0	-0.235	0.235	TN	0.0518	YES
+	2041	CC1CC2C3CCC4=CC(=O)C=CC4(C)C3C(=O)CC2(C)C1(O)C(=O)CO	9.25768	1	0.5055	0.4945	TP	0.0391	YES
+	2032	CCCCCCCCCCCCCCCC(=O)OC1CC(C)=C(C=CC(C)=CC=CC(C)=CC=CC=C(C)C=CC=C(C)C=CC2=C(C)CC(OC(=O)CCCCCCCCCCCCCCC)CC2(C)C)C(C)(C)C1	19.3319	0	0.8869	-0.8869	FP	0.0695	YES
*	2074	O=C(CCC1CCN(Cc2ccccc2)CC1)c1ccc2c(c1)NCCCC2	17.7897	1	0.8285	0.1715	TP	0.027	YES
+	3304	CC(C)c1nc(CN(C)C(=O)NC(CCN2CCOCC2)C(=O)NC(CCC(Cc2ccccc2)NC(=O)OCc2cncs2)Cc2ccccc2)cs1	7.02624	0	0.421	-0.421	TN	1.0647	No
*	2086	CCCN(CCC)C(=O)C(CCC(=O)OCCCN1CCN(CCOC(=O)Cc2c(C)n(C(=O)c3ccc(Cl)cc3)c3ccc(OC)cc23)CC1)NC(=O)c1ccccc1	16.631	1	0.7846	0.2154	TP	0.0613	YES
-	1338	CCCCCCCCCCCCCCCC[N+](C)(C)C	11.7324	0	0.5992	-0.5992	FP	0.0122	YES
-	2124	COc1cc(O)c2c(c1)C1OC1CC(O)C(O)C(=O)C=CCC(C)OC2=O	1.28557	1	0.2036	0.7964	FN	0.0291	YES
*	2428	CC1CC2=CC(=O)CCC2C2CCC3(C)C(CCC3(C)O)C12	5.81335	0	0.375	-0.375	TN	0.0343	YES
#	2127	CN(C)CCCNC(=O)c1ccc(-c2cc(O)c3ncccc3c2)cc1	13.6672	1	0.6724	0.3276	TP	0.0241	YES
-	342	C[N+]1(C)CCC(=C(c2ccccc2)c2ccccc2)CC1	6.04358	0	0.3838	-0.3838	TN	0.0141	YES
-	2129	COC(=O)C1=C(C)NC(COC(N)=O)=C(C(=O)OC(C)C)C1c1cccc(Cl)c1Cl	10.9753	1	0.5705	0.4295	TP	0.0363	YES
-	909	Nc1ncnc2nc(-c3ccc(N4CCOCC4)nc3)cc(-c3cccc(Br)c3)c12	12.4018	0	0.6245	-0.6245	FP	1.0565	No
#	2134	O=C(CCCN1CCN(c2ccc(F)cc2)CC1)NC1c2ccccc2CSc2ccccc21	16.423	1	0.7767	0.2233	TP	0.0381	YES
-	3326	Cc1cc(N2CCOCC2)ccc1Nc1nc(NC2CCCCC2)c2[nH]cnc2n1	6.39164	0	0.3969	-0.3969	TN	0.0334	YES
+	2145	CCN1CCN(c2cc(-c3ccc(F)cc3)c3c(n2)CCCCCC3)CC1	19.1137	1	0.8786	0.1214	TP	0.0442	YES
#	3772	Cc1[nH]nc2ncc(C(=O)N3CCCC3c3ccc(Cl)cc3)cc12	6.69802	0	0.4085	-0.4085	TN	0.0367	YES
#	2181	COC1C(OC(C)=O)CC(=O)OC(C)CC=CC=CC(OC2CCC(N(C)C)C(C)O2)C(C)CC(CC=O)C1OC1OC(C)C(OC2CC(C)(O)C(O)C(C)O2)C(N(C)C)C1O	11.9781	1	0.6085	0.3915	TP	0.0637	YES
*	1024	CCOC(=O)C1=CC(OC(CC)CC)C(NC(C)=O)C(N)C1	-0.26739	0	0.1448	-0.1448	TN	0.0215	YES
#	2190	CCc1ccc(C=C2SC(=S)NC2=O)cc1	13.9694	1	0.6838	0.3162	TP	0.0291	YES
-	2679	CC#CC1(O)CCC2C3CC(C)C4=CC(=O)CCC4(C)C3CCC21C	12.354	0	0.6227	-0.6227	FP	0.0469	YES
#	2210	COc1cc(F)c(F)c(Nc2ccc(I)cc2F)c1NS(=O)(=O)C1(CC(O)CO)CC1	17.5447	1	0.8192	0.1808	TP	0.0659	YES
*	164	CC(C)Cc1ccc(C(C)C(=O)O)cc1	4.79673	0	0.3366	-0.3366	TN	0.0081	YES
#	2223	COc1cc(C(C)=O)ccc1OCCCN1CCC(c2noc3cc(F)ccc23)CC1	13.5542	1	0.6681	0.3319	TP	0.0369	YES
*	897	CCN1CCCC1CNC(=O)c1cc(S(=O)(=O)CC)c(N)cc1OC	-4.23435	0	-0.0054	0.0054	TN	0.0237	YES
+	2224	Cc1ccc(Nc2nccc(N(C)c3ccc4c(C)n(C)nc4c3)n2)cc1S(N)(=O)=O	9.23783	1	0.5047	0.4953	TP	0.0618	YES
+	1499	CCCc1ccc(C(=O)O)cc1	4.95926	0	0.3427	-0.3427	TN	0.0071	YES
+	2236	O=C(Nc1ccc(F)c(C(F)(F)F)c1)Nc1nnc(-c2ccncc2)s1	19.1987	1	0.8818	0.1182	TP	0.0665	YES
-	2295	OCC1OC(Oc2cc(O)cc(C=Cc3ccc(O)cc3)c2)C(O)C(O)C1O	-0.78622	0	0.1252	-0.1252	TN	0.026	YES
#	2238	COc1cc(C)c(Sc2cnc(NC(=O)c3ccc(CNC(C)C(C)(C)C)cc3)s2)cc1C(=O)N1CCN(C(C)=O)CC1	17.8842	1	0.8321	0.1679	TP	0.0507	YES
#	1331	C[Si](C)(C)O[Si](C)(C)O[Si](C)(C)C	-0.97487	0	0.118	-0.118	TN	0.0072	YES
*	2242	Cn1cc(C2=C(c3cn(C4CCN(Cc5ccccn5)CC4)c4ccccc34)C(=O)NC2=O)c2ccccc21	20.3207	1	0.9243	0.0757	TP	0.0821	YES
#	641	CC1(C)OC2CC3C4CCC5=CC(=O)C=CC5(C)C4(F)C(O)CC3(C)C2(C(=O)CO)O1	-0.70231	0	0.1283	-0.1283	TN	0.055	YES
#	2247	Cc1ccc(NC(=O)c2ccc(CN3CCN(C)CC3)cc2)cc1Nc1nc(-c2cccnc2)cs1	16.2169	1	0.7689	0.2311	TP	0.0524	YES
*	750	Cc1ccnc2c1NC(=O)c1cccnc1N2C1CC1	5.52686	0	0.3642	-0.3642	TN	0.0242	YES
*	2251	OCCC#Cc1nc(-c2ccc(F)cc2)c(-c2ccncc2)n1CCCc1ccccc1	13.8538	1	0.6795	0.3205	TP	0.0462	YES
#	1750	NC(=O)c1ccc[n+](C2OC(COP(=O)(O)OP(=O)(O)OCC3OC(n4cnc5c(N)ncnc54)C(O)C3O)C(O)C2O)c1	-3.39019	0	0.0266	-0.0266	TN	0.1007	YES
#	2270	CCN(CC)CCOc1ccc(Nc2ncc3cc(-c4c(Cl)cccc4Cl)c(=O)n(C)c3n2)cc1	11.4545	1	0.5886	0.4114	TP	0.0598	YES
#	2966	Cc1cncc2cccc(S(=O)(=O)N3CCCN(C(=O)CN)CC3C)c12	2.83095	0	0.2621	-0.2621	TN	0.0345	YES
*	2273	CC(C)(C)c1cc(NC(=O)Nc2ccc(-c3cn4c(n3)sc3cc(OCCN5CCOCC5)ccc34)cc2)no1	39.6325	1	1.6555	-0.6555	TP	3.0785	No
-	2964	CC(C)OC(=O)CCCC=CCC1C(O)CC(O)C1C=CC(O)COc1cccc(C(F)(F)F)c1	9.44389	0	0.5125	-0.5125	FP	0.0333	YES
*	2279	CC(=O)OCC(=O)C1(O)C(C)CC2C3C=C(C)C4=Cc5c(cnn5-c5ccccc5)CC4(C)C3C(O)CC21C	31.2203	1	1.337	-0.337	TP	0.0864	YES
-	1584	CC(O)(CS(=O)(=O)c1ccc(F)cc1)C(=O)Nc1ccc(C#N)c(C(F)(F)F)c1	5.90074	0	0.3784	-0.3784	TN	0.0487	YES
#	2289	CCOC(=O)c1c(CSc2ccccc2)n(C)c2cc(Br)c(O)c(CN(C)C)c12	12.5421	1	0.6298	0.3702	TP	0.0335	YES
+	3569	CNC(=O)c1c(C)oc2cc(Oc3ncnc4cc(OC)c(OC)cc34)ccc12	-1.40146	0	0.1019	-0.1019	TN	2.0393	No
#	2298	COc1ccc2cc1Oc1ccc(cc1)CC1c3cc(c(OC)cc3CCN1C)Oc1c(O)c(OC)cc3c1C(C2)N(C)CC3	14.3807	1	0.6994	0.3006	TP	0.0427	YES
-	2963	CCOC(=O)Nc1ccc(NCc2ccc(F)cc2)cc1N	5.93418	0	0.3796	-0.3796	TN	0.0213	YES
*	2300	CC(=O)ON=C1C(=O)N(Cc2cc(Cl)ccc2Cl)c2ccc(Cl)cc21	0.0908	1	0.1584	0.8416	FN	3.0318	No
*	3199	CN1CCc2nc(C(=O)NC3CC(C(=O)N(C)C)CCC3NC(=O)C(=O)Nc3ccc(Cl)cn3)sc2C1	-4.6102	0	-0.0196	0.0196	TN	1.0614	No
-	2304	COc1c(C)cnc(Cn2cnc3c(Cl)nc(N)nc32)c1C	13.9927	1	0.6847	0.3153	TP	0.0352	YES
+	1357	CCCCCCCCCCCCCCCCCC(=O)OCC(O)CO	9.23646	0	0.5046	-0.5046	FP	0.0163	YES
*	2305	CCNC(=O)c1noc(-c2cc(C(C)C)c(O)cc2O)c1-c1ccc(CN2CCOCC2)cc1	19.0682	1	0.8769	0.1231	TP	0.0506	YES
*	2087	O=C(COCCOCCOCC(=O)Nc1c(I)cc(I)c(C(=O)O)c1I)Nc1c(I)cc(I)c(C(=O)O)c1I	16.2959	0	0.7719	-0.7719	FP	0.1482	YES
#	2307	O=C(NC(c1ccccc1)C1CCCCN1)c1cccc(C(F)(F)F)c1Cl	27.1736	1	1.1838	-0.1838	TP	0.0347	YES
#	71	C[N+](C)(C)CC(=O)O	-5.59444	0	-0.0569	0.0569	TN	0.0058	YES
+	2321	Cc1ccc(C(=O)Nc2cccc(C(F)(F)F)c2)cc1Nc1nc(-c2cccnc2)nc2c1cnn2C	13.043	1	0.6488	0.3512	TP	0.0654	YES
#	49	NCCCNCCSP(=O)(O)O	-0.05922	0	0.1527	-0.1527	TN	0.0214	YES
#	2326	O=C(Nc1ccc(S(=O)(=O)N2CCOCC2)cc1)c1cc(Cl)ccc1NS(=O)(=O)c1ccc(Cl)s1	11.8908	1	0.6051	0.3949	TP	0.0595	YES
#	2125	CCOC1OC(=O)CC1NC(=O)C1CCCN1C(=O)C(NC(=O)c1ccc(N)c(Cl)c1)C(C)(C)C	-0.91093	0	0.1204	-0.1204	TN	0.0348	YES
*	2338	CN(C)CCOC(c1ccccc1)c1ccc(Br)cc1	15.0533	1	0.7249	0.2751	TP	0.018	YES
+	2020	CCOC(=O)C(CCc1ccccc1)NC(C)C(=O)N1C(C(=O)O)CC2CCCCC21	9.01939	0	0.4964	-0.4964	TN	0.0286	YES
-	2361	CN(C)CCCOC1(Cc2ccccc2)CCCCCC1	9.10444	1	0.4997	0.5003	FN	0.0168	YES
-	2655	CCN1CCC(n2cc(CNc3cc(Cl)c4ncc(C#N)c(Nc5ccc(F)c(Cl)c5)c4c3)nn2)CC1	4.08596	0	0.3096	-0.3096	TN	0.0895	YES
*	2392	CN1CCN(c2cc(C(=O)Nc3ccc4c(c3)-c3c(c(C(N)=O)nn3-c3ccc(F)cc3)CC4)c(Cl)cn2)CC1	5.49805	1	0.3631	0.6369	FN	1.0693	No
-	132	Cc1cc(O)c2c(c1)C(=O)c1cc(O)cc(O)c1C2=O	3.19778	0	0.276	-0.276	TN	0.0232	YES
#	2394	Cc1c(CCOc2ccc(C(=O)O)cc2)c2cc(Cl)ccc2n1C(c1ccccc1)c1ccccc1	18.3881	1	0.8512	0.1488	TP	0.0313	YES
-	986	C#CC1(O)CCC2C3CCC4=CC(=O)CCC4(C)C3CCC21C	7.99153	0	0.4575	-0.4575	TN	0.0422	YES
#	2401	Cc1ccc(F)c(NC(=O)Nc2ccc(-c3cccc4n[nH]c(N)c34)cc2)c1	9.53682	1	0.516	0.484	TP	0.0346	YES
*	221	Cc1cc(C(C)(C)C)c(O)c(C)c1CC1=NCCN1	-4.54092	0	-0.017	0.017	TN	0.021	YES
#	2403	Cn1c(Nc2ccc(C(F)(F)F)cc2)nc2cc(Oc3ccnc(-c4ncc(C(F)(F)F)[nH]4)c3)ccc21	20.1394	1	0.9175	0.0825	TP	0.082	YES
-	183	Cc1oncc1C(=O)Nc1ccc(C(F)(F)F)cc1	3.46923	0	0.2863	-0.2863	TN	0.0318	YES
+	2405	O=C(O)c1ccc(-c2c[nH]c3ncc(-c4ccccc4)cc23)cc1C1CCCC1	11.4725	1	0.5893	0.4107	TP	1.0517	No
-	1139	CNC(C)Cc1ccccc1OC	6.81637	0	0.413	-0.413	TN	0.0064	YES
+	2415	CC1CCCCN1CCCOC(=O)c1ccc(OC2CCCCC2)cc1	15.167	1	0.7292	0.2708	TP	0.0193	YES
-	3506	CNC1CCc2[nH]c3ccc(C(N)=O)cc3c2C1	6.24009	0	0.3912	-0.3912	TN	0.0155	YES
#	2436	CN(C)C(CCOc1cccc2ccccc12)c1ccccc1	23.4296	1	1.042	-0.042	TP	0.0111	YES
*	1230	CSCCC(N)C(=O)O	-9.43223	0	-0.2022	0.2022	TN	0.0126	YES
+	2441	Cc1cccc(Nc2nc(NC3CCCCC3N)ncc2C(N)=O)c1	11.5914	1	0.5938	0.4062	TP	0.0347	YES
#	311	Brc1c(NC2=NCCN2)ccc2nccnc12	-6.13639	0	-0.0774	0.0774	TN	0.0344	YES
*	2475	CCC(CN)=C(c1ccccc1)c1ccccc1	14.0071	1	0.6853	0.3147	TP	0.0122	YES
*	1261	CC(C)CC(=O)NC(C(=O)NC(C(=O)NC(CC(C)C)C(O)CC(=O)NC(C)C(=O)NC(CC(C)C)C(O)CC(=O)O)C(C)C)C(C)C	5.25279	0	0.3538	-0.3538	TN	0.0365	YES
*	2483	Cc1nn(Cc2ccccc2Cl)c(C)c1CN(C)CC(O)COc1ccc(Cl)cc1	8.02081	1	0.4586	0.5414	FN	3.0248	No
+	2876	C#Cc1cccc(Nc2ncnc3cc(OCCOC)c(OCCO)cc23)c1	4.23965	0	0.3155	-0.3155	TN	0.0404	YES
*	2485	COc1cc2nc(-c3ccc(N4CCN(C)CC4)cc3)nc(NCCN3CCOCC3)c2cc1OC	14.9706	1	0.7218	0.2782	TP	0.0583	YES
-	1018	CCCc1cc(C(N)=S)ccn1	6.06925	0	0.3847	-0.3847	TN	0.0152	YES
#	2495	Cc1cccc(C=NNc2cc(N3CCOCC3)nc(OCCc3ccccn3)n2)c1	14.6791	1	0.7107	0.2893	TP	0.0522	YES
-	3315	CNC(C)C(=O)NC(C(=O)N1CCCC1C(=O)Nc1snnc1-c1ccccc1)C1CCCCC1	6.42988	0	0.3984	-0.3984	TN	1.0538	No
+	2496	Cc1csc(-c2nnc(Nc3ccc(Oc4ncccc4-c4ccnc(N)n4)cc3)c3ccccc23)c1	22.207	1	0.9957	0.0043	TP	4.084	No
*	3194	CCOc1ccc(Cc2cc(C34OCC(CO)(O3)C(O)C(O)C4O)ccc2Cl)cc1	-11.977	0	-0.2985	0.2985	TN	3.0417	No
-	2508	CCCCCCCc1ccc(CCc2cccc(O)c2C(=O)O)cc1	9.81119	1	0.5264	0.4736	TP	0.0141	YES
*	1040	COc1ccc2ccc(=O)oc2c1CC=C(C)C	4.5626	0	0.3277	-0.3277	TN	1.0199	No
*	2515	CCN(CC)CCCCNc1nc2cc(Cl)c(Cl)cc2nc1-c1ccc(-c2cccs2)s1	21.4053	1	0.9654	0.0346	TP	0.0749	YES
-	3807	CCC1C(COc2nccc3cc(C(N)=O)c(OC)cc23)NC(=O)C1F	2.34299	0	0.2436	-0.2436	TN	1.0311	No
+	2525	O=C(O)C(=O)c1cn(Cc2ccccc2)c2ccc(-c3ccc(OC(F)(F)F)cc3)cc12	19.4456	1	0.8912	0.1088	TP	0.0382	YES
#	3437	N#Cc1ccc(C2CCCc3cncn32)cc1	1.55064	0	0.2136	-0.2136	TN	0.0211	YES
+	2531	Nc1nc(Nc2ccc(S(N)(=O)=O)cc2)nn1C(=O)c1c(F)cccc1F	9.5699	1	0.5173	0.4827	TP	2.0404	No
-	174	CC(C(=O)O)c1ccc(CC2CCCC2=O)cc1	4.03427	0	0.3077	-0.3077	TN	0.0174	YES
+	2535	S=C(NCc1ccc2c(c1)OCO2)N1CCN(c2ncnc3c2oc2ccccc23)CC1	15.5262	1	0.7428	0.2572	TP	4.0529	No
+	3787	CCC(C)CNCC(=O)N1CCc2sccc2C1c1cccc(C)n1	9.69358	0	0.522	-0.522	FP	0.0407	YES
*	2545	c1ccc2c(CCNc3ccc(Nc4ccncc4)cc3)c[nH]c2c1	15.9132	1	0.7574	0.2426	TP	0.0433	YES
#	2138	Nc1c(NCC=CCOc2cc(CN3CCCCC3)ccn2)c(=O)c1=O	1.29138	0	0.2038	-0.2038	TN	0.0505	YES
#	2565	COc1ccc(C2CC(c3ccccc3)=NN2c2ccc(S(N)(=O)=O)cc2)cc1	13.6495	1	0.6717	0.3283	TP	0.0314	YES
#	3914	COCC1=C(C(=O)O)N2C(=O)C(NC(=O)C(=NOC)c3csc(N)n3)C2SC1	-3.91294	0	0.0068	-0.0068	TN	0.056	YES
#	2568	Cc1c(C(=O)Nc2cccc(C(F)(F)F)c2)cc(-c2ccccc2)n1CCCN1CCOCC1	12.3433	1	0.6223	0.3777	TP	0.048	YES
#	3404	CC(NC(=O)C(NC(=O)OCc1ccccc1)C(C)C)C(=O)NC(CC(=O)O)C(=O)CF	1.82291	0	0.224	-0.224	TN	0.0287	YES
*	2573	CCOC(CN1C(=O)C(CC(=O)Nc2ccc(C)cc2)(NC(=O)Nc2ccc(C)cc2)c2ccccc21)OCC	18.5828	1	0.8585	0.1415	TP	0.0422	YES
-	3778	CC1(N)CCN(c2cccnc2NC(=O)c2nc(-c3ncccc3C(F)(F)F)cnc2N)CC1	5.50231	0	0.3633	-0.3633	TN	0.0563	YES
#	2578	CN(C)c1ccc(C2Nc3ccc4ccccc4c3C3=C2C(=O)CC(C)(C)C3)cc1Br	19.1364	1	0.8795	0.1205	TP	0.0402	YES
-	2049	O=C(Cn1c(=O)sc2ccc(Cl)cc21)N1CCN(CCO)CC1	2.38349	0	0.2452	-0.2452	TN	1.0433	No
-	2600	CN1CC2c3ccccc3Oc3ccc(Cl)cc3C2C1	12.6086	1	0.6323	0.3677	TP	0.0279	YES
-	1098	O=C(OCCO)c1ccccc1O	5.71238	0	0.3712	-0.3712	TN	0.0083	YES
-	2621	CCCCCCCCCCCCCCCc1cccc(O)c1C(=O)O	15.9239	1	0.7579	0.2421	TP	0.0152	YES
#	3197	Cc1cc(N2CCN(C3CNC(C(=O)N4CCSC4)C3)CC2)n(-c2ccccc2)n1	-6.1416	0	-0.0776	0.0776	TN	0.0535	YES
#	2651	CN1CCCC(CC2c3ccccc3Sc3ccccc32)C1	16.7527	1	0.7892	0.2108	TP	0.0323	YES
+	2503	CC(C)(N)C(=O)NC(COCc1ccccc1)C(=O)N1CCC2(CC1)CN(S(C)(=O)=O)c1ccccc12	12.2864	0	0.6201	-0.6201	FP	0.0424	YES
*	2691	Cc1cnc(NC(=O)Nc2cc(Br)c(C)cc2OCC2CNCCO2)cn1	5.20475	1	0.352	0.648	FN	0.042	YES
-	2638	NC(=O)C(c1ccccc1)(c1ccccc1)C1CCN(CCc2ccc3c(c2)CCO3)C1	8.83819	0	0.4896	-0.4896	TN	0.0362	YES
-	2693	c1ccc2c(Oc3nc(Nc4ccc(N5CCOCC5)cc4)c4ncn(C5CCCCC5)c4n3)cccc2c1	17.6241	1	0.8222	0.1778	TP	2.0874	No
+	433	c1ccc(CN(CC2=NCCN2)c2ccccc2)cc1	4.35484	0	0.3198	-0.3198	TN	0.0243	YES
+	2701	COc1cccc(C(C)NCCCc2ccccc2Cl)c1	14.5147	1	0.7045	0.2955	TP	3.0112	No
*	1981	CCCCC1C(=O)NC(=O)N(C2CCCCC2)C1=O	2.80047	0	0.261	-0.261	TN	0.0224	YES
-	2745	CC(C)C1C(=O)NC(CO)Cc2c[nH]c3cccc(c23)N1C	6.53786	1	0.4025	0.5975	FN	0.0237	YES
*	2207	CC(C)(CO)C(O)C(=O)NCCCO	-0.90683	0	0.1206	-0.1206	TN	0.0113	YES
#	2758	CN1CCC(COc2cnc(-c3cccc(Cn4nc(-c5cccc(C#N)c5)ccc4=O)c3)nc2)CC1	15.9045	1	0.7571	0.2429	TP	0.0693	YES
+	2662	CCCCC(=O)OC1(C(=O)CO)C(C)CC2C3CCC4=CC(=O)C=CC4(C)C3(F)C(O)CC21C	0.99355	0	0.1926	-0.1926	TN	0.0496	YES
-	2764	CC(C)CC(NC(=O)C(Cc1ccccc1)NC(=O)OCc1ccccc1)C(=O)C=O	8.46474	1	0.4754	0.5246	FN	0.0238	YES
+	1879	CC(C=CC=C(C)C=CC1=C(C)CC(O)CC1(C)C)=CC=CC=C(C)C=CC=C(C)C=CC1=C(C)CC(O)CC1(C)C	-1.59079	0	0.0947	-0.0947	TN	0.0477	YES
+	2765	O=C(NCc1ccccc1)C(Cc1ccccc1)NC(=O)C1OC1C(=O)NCCc1ccc(O)cc1	16.9757	1	0.7977	0.2023	TP	0.029	YES
*	2407	C=CCC1(C(C)CC)C(=O)NC(=O)NC1=O	-5.30583	0	-0.046	0.046	TN	0.0207	YES
+	2770	COc1ccc(-c2oc3c(CC=C(C)C)c(O)cc(O)c3c(=O)c2O)cc1	2.2242	1	0.2391	0.7609	FN	3.0303	No
+	3260	CC1COCCN1c1cc(=O)n2c(n1)N(Cc1cncc(Cl)c1)C(C(F)(F)F)CC2	6.57328	0	0.4038	-0.4038	TN	0.0577	YES
-	2775	CC(C)(N)c1ccc(-c2nc3ccccc3nc2-c2ccccc2)cc1	11.2816	1	0.5821	0.4179	TP	0.0365	YES
+	1953	CC(C=CC1=C(C)CCCC1(C)C)=CC=CC(C)=CC(=O)Oc1c(C)c(C)c2c(c1C)CCC(C)(CCCC(C)CCCC(C)CCCC(C)C)O2	9.26816	0	0.5059	-0.5059	FP	0.0535	YES
+	2782	CCc1nc(-c2cccc(C)c2)c(-c2ccnc(NC(=O)c3ccccc3)c2)s1	20.9685	1	0.9489	0.0511	TP	0.0441	YES
#	1867	O=C(O)C1C(=CCO)OC2CC(=O)N21	-4.08257	0	0.0004	-0.0004	TN	0.0175	YES
+	2783	O=C1NC(=O)C(=Cc2cccc(C(F)(F)F)c2)S1	15.5397	1	0.7433	0.2567	TP	1.0305	No
*	2768	O=C1NC(O)CCN1C1OC(CO)C(O)C1O	-7.87846	0	-0.1434	0.1434	TN	1.0165	No
#	2789	COc1ccc2c(Oc3ccc(NC(=O)c4c(C)n(CC(C)(C)O)n(-c5ccccc5)c4=O)cc3F)ccnc2c1	22.3607	1	1.0016	-0.0016	TP	0.065	YES
#	457	CCn1cc(C(=O)O)c(=O)c2cnc(N3CCCC3)nc21	-7.96256	0	-0.1465	0.1465	TN	0.0437	YES
+	2790	CN(C)CC(=O)N1CCC(c2ccc(NC(=O)c3ncc(C#N)[nH]3)c(C3=CCCCC3)c2)CC1	10.3328	1	0.5462	0.4538	TP	0.0407	YES
-	1608	Oc1ccc(C(O)CNCCCCCCNCC(O)c2ccc(O)c(O)c2)cc1O	7.00542	0	0.4202	-0.4202	TN	0.0216	YES
+	2803	NC(=O)c1cccc2cn(-c3ccc(C4CCCNC4)cc3)nc12	9.48088	1	0.5139	0.4861	TP	0.032	YES
-	1652	O=C(NCCCCN1CCOCC1)c1cc2ccccc2o1	3.80787	0	0.2991	-0.2991	TN	2.0245	No
+	2822	CC(NC(=O)C(=O)Nc1ccccc1C(C)(C)C)C(=O)NC(CC(=O)O)C(=O)COc1c(F)c(F)cc(F)c1F	-0.36503	1	0.1411	0.8589	FN	2.0377	No
-	3677	COc1cc2c3c(n(CCCN4CCOCC4)c(=O)c2cc1OC)-c1cc2c(cc1C3=O)OCO2	4.21408	0	0.3145	-0.3145	TN	0.0483	YES
#	2825	Cc1c(NC(=O)OCC2COCCN2)cn2ncnc(Nc3ccc4c(cnn4Cc4cccc(F)c4)c3)c12	13.7249	1	0.6746	0.3254	TP	0.0754	YES
-	1850	Clc1ccc(C(Cn2ccnc2)OCc2c(Cl)cccc2Cl)c(Cl)c1	5.85684	0	0.3767	-0.3767	TN	3.0264	No
*	2842	Cc1ccc(NC(=O)c2ccc(CN3CCC(N(C)C)C3)c(C(F)(F)F)c2)cc1Nc1ncc(-c2cncnc2)cn1	11.4245	1	0.5875	0.4125	TP	0.0641	YES
+	274	O=C1NC(=O)C(c2ccccc2[N+](=O)[O-])=C1Nc1ccc(O)c(Cl)c1	6.26298	0	0.3921	-0.3921	TN	0.0228	YES
+	2849	CCC1C=CC=CCC(C)C(O)C(C)(O)C(=O)C(C)C(O)C(C)C(=O)C(C)C(O)C(C)C=CC(=O)OC2C(C)C(CC1)OC1(CCC(C)C(CC(C)O)O1)C2C	19.8931	1	0.9081	0.0919	TP	1.0439	No
+	553	CC1Cc2ccccc2N1NC(=O)c1ccc(Cl)c(S(N)(=O)=O)c1	3.36774	0	0.2824	-0.2824	TN	1.0279	No
#	2853	CC(C)(C)Cn1c(N)nc2ccc(-c3nc(C(C)(C)C)[nH]c3-c3ccc(F)cc3)nc21	17.9188	1	0.8334	0.1666	TP	0.0467	YES
-	3542	O=C(NCC(=O)N1CCC(NC2CCC(O)(c3ccc(-c4ncccn4)cn3)CC2)C1)c1cccc(C(F)(F)F)c1	1.45887	0	0.2102	-0.2102	TN	1.0694	No
*	2856	COc1cc(Nc2nc3ccccc3nc2NS(=O)(=O)c2ccc(NC(=O)c3ccc(C)c(OC)c3)cc2)cc(OC)c1	11.4764	1	0.5895	0.4105	TP	0.0492	YES
+	874	Oc1ccccc1-c1ccccc1	9.15311	0	0.5015	-0.5015	FP	0.0135	YES
#	2857	CNC(=O)c1ccc2c(c1)NC(=O)/C2=C(/Nc1cccc(CN(C)C)c1)c1ccccc1	18.0881	1	0.8398	0.1602	TP	0.0335	YES
*	205	CNC1(C)C2CCC(C2)C1(C)C	5.02331	0	0.3451	-0.3451	TN	0.0132	YES
+	2861	CCCCCCCCCCCCc1ccc(S(=O)(=O)Nc2nncs2)cc1	10.612	1	0.5567	0.4433	TP	1.0478	No
*	2507	CNC(=O)c1ccc(N2C(=S)N(c3ccc(C#N)c(C(F)(F)F)c3)C(=O)C2(C)C)cc1F	7.35717	0	0.4335	-0.4335	TN	2.0494	No
+	2884	C=C1C(=O)C23C(O)C1CCC2C12COC3(O)C(O)C1C(C)(C)CCC2O	17.2635	1	0.8086	0.1914	TP	0.042	YES
+	3507	CCN1CCC(=C2c3ccccc3CCc3ccccc32)C1C	15.533	0	0.7431	-0.7431	FP	0.0226	YES
-	2888	CNC(C)C1C(O)CC2(C)C3CCC4C(C)(C)C(NC)CCC45CC35CCC12C	16.8212	1	0.7918	0.2082	TP	2.0454	No
-	1635	COc1ccc(-c2noc(CC(=O)O)c2-c2ccc(OC)cc2)cc1	4.70459	0	0.3331	-0.3331	TN	0.0336	YES
-	2899	O=C1NC(=O)/C(=C/c2ccc(-c3ccc(F)cc3)o2)S1	17.1833	1	0.8055	0.1945	TP	4.0301	No
*	3947	O=C(NCc1c(F)cc(F)cc1F)c1cn2c(c(O)c1=O)C(=O)N1C3CCC(C3)OC1C2	-8.78681	0	-0.1778	0.1778	TN	3.0498	No
#	2903	Cn1cc(-c2ccncc2)c(-c2ccc(OCc3ccc4ccccc4n3)cc2)n1	13.016	1	0.6478	0.3522	TP	0.0524	YES
#	3039	O=C(Nc1cccc(C(F)(F)F)c1)Nc1cc(S(=O)(=O)NC2CC2)ccc1-c1ccsc1	8.42522	0	0.4739	-0.4739	TN	0.0617	YES
*	2943	COc1cc(NC(=O)c2ccc(-c3ccc(Cl)cc3)o2)cc(OC)c1	14.5515	1	0.7059	0.2941	TP	3.0256	No
#	3401	CC(C)C(N)C(=O)OCC(CO)OCn1cnc2c(=O)nc(N)[nH]c21	-5.77036	0	-0.0635	0.0635	TN	0.0332	YES
+	2953	COc1cc(CCc2cc(NC(=O)c3ccc(N4CC(C)NC(C)C4)cc3)[nH]n2)cc(OC)c1	13.4903	1	0.6657	0.3343	TP	0.0376	YES
-	3656	Cc1cc(Nc2cc(N)ncn2)c(=O)n2c1C(=O)NC21CCCCC1	-0.14951	0	0.1493	-0.1493	TN	0.0466	YES
#	2965	CC(O)(C#Cc1ccc2c(c1)N(c1nc(N)ncc1Cl)CC2)c1nccs1	14.3263	1	0.6974	0.3026	TP	0.0466	YES
+	806	CN(C)Cc1ccccc1	5.69445	0	0.3705	-0.3705	TN	0.0036	YES
+	2968	NC(=O)c1cccc(-c2cc(Nc3ccc(OC(F)(F)F)cc3)ncn2)c1	13.457	1	0.6644	0.3356	TP	0.0448	YES
*	2018	O=C(OCC1(COC(=O)c2cccnc2)CCCC(COC(=O)c2cccnc2)(COC(=O)c2cccnc2)C1O)c1cccnc1	-4.4338	0	-0.0129	0.0129	TN	0.0487	YES
-	2995	NC(=O)c1noc(C(CCCC2CCCCC2)CC(=O)NO)n1	13.2664	1	0.6572	0.3428	TP	1.0266	No
-	3873	CC(C)=C/C(C)=N\Nc1nncc2ccccc12	8.55987	0	0.479	-0.479	TN	0.0245	YES
*	3001	CC1(N2CCC(n3c(C4CCCNC4)nc4ccccc43)CC2)CCCCCCC1	13.6262	1	0.6709	0.3291	TP	1.0475	No
-	1618	CC1COc2c(C3(N)CC3)c(F)cc3c(=O)c(C(=O)O)cn1c23	0.49364	0	0.1736	-0.1736	TN	0.035	YES
#	3003	Cc1ccc(NC(=O)Nc2cc(C(F)(F)F)ccc2F)cc1Nc1ccc2c(c1)NC(=O)C2=Cc1ccc[nH]1	30.4907	1	1.3094	-0.3094	TP	0.0546	YES
#	3835	Cn1c(C=CCO)c(CO)c2c1C(=O)C=C(N1CC1)C2=O	-5.81118	0	-0.0651	0.0651	TN	0.0368	YES
#	3020	c1ccc(CNc2nc(N3CCOc4ccccc43)nc3c2CCCC3)cc1	27.1203	1	1.1818	-0.1818	TP	0.0511	YES
+	1959	CON=C(C(=O)NC1C(=O)N2C(C(=O)O)=C(C[n+]3ccn4ncccc43)CSC12)c1nsc(N)n1	-3.70446	0	0.0147	-0.0147	TN	3.0714	No
#	3026	N#Cc1c(C2CCNCC2)cc(-c2c(O)cccc2OCC2CC2)nc1N	16.2185	1	0.769	0.231	TP	0.0362	YES
-	2038	CC(=O)OC(C)OC(=O)C(C)c1ccc(-c2ccccc2)c(F)c1	7.70384	0	0.4466	-0.4466	TN	0.019	YES
#	3033	O=C1CSC(=O)N1C(CCc1ccncc1)COc1ccc(-c2cccc([N+](=O)[O-])c2)cc1	17.0457	1	0.8003	0.1997	TP	0.0385	YES
-	2520	CCc1cncnc1N1CCN(Cc2nc3ccc(C(F)(F)F)cc3[nH]2)CC1	5.97515	0	0.3812	-0.3812	TN	1.0397	No
-	3073	COc1ccc(C(O)C(C)Oc2ccc(C3OC(c4ccc(OC(C)C(O)c5ccc(OC)c(OC)c5)c(OC)c4)C(C)C3C)cc2OC)cc1OC	15.6539	1	0.7476	0.2524	TP	0.0718	YES
*	3845	Nc1nc(=O)c2c([nH]1)NCC1CN(c3ccc(C(=O)NC(CCC(=O)O)C(=O)O)cc3)CN21	-4.45061	0	-0.0136	0.0136	TN	0.037	YES
*	3081	Cc1cc(Nc2ncc(Cl)c(Nc3ccccc3S(=O)(=O)C(C)C)n2)c(OC(C)C)cc1C1CCNCC1	14.8487	1	0.7171	0.2829	TP	1.0577	No
-	2810	COc1cc2c(cc1OC)CN(CCc1ccc(NC(=O)c3cc(OC)c(OC)cc3NC(=O)c3cnc4ccccc4c3)cc1)CC2	14.1204	0	0.6896	-0.6896	FP	0.0565	YES
+	3083	NC(=O)c1cnc(NC2CCCCC2N)nc1Nc1cccc(-n2nccn2)c1	15.9096	1	0.7573	0.2427	TP	0.0483	YES
*	1942	CC(C)=CCCC(C)=CCCC(C)=CCCC=C(C)CCC=C(C)CCC=C(C)C	6.60617	0	0.4051	-0.4051	TN	0.0259	YES
#	3084	CCOc1ccccc1-n1c(C(C)N2CCN(C(=O)COc3ccc(Cl)cc3)CC2)nc2ccccc2c1=O	11.2948	1	0.5826	0.4174	TP	0.0471	YES
-	3185	CN1c2c([nH]c(N)nc2=O)NCC1CNc1ccc(C(=O)NC(CCC(=O)O)C(=O)O)cc1	0.32382	0	0.1672	-0.1672	TN	0.0425	YES
*	3089	Cc1cn(CCN2CCN(c3ccccc3-c3cc(C#N)cc(C(=O)NCCCN4CCCC4)c3)CC2)c2ccccc12	18.0918	1	0.8399	0.1601	TP	0.049	YES
-	706	CCCN1CCOC2c3cc(O)ccc3OCC21	1.68716	0	0.2188	-0.2188	TN	0.0247	YES
#	3110	Cn1c(NCC(N)Cc2ccccc2)nc(-c2ccncc2)c(-c2ccc3ccccc3c2)c1=O	15.8186	1	0.7539	0.2461	TP	0.0511	YES
+	346	Nc1ccc(S(=O)(=O)Nc2ncccn2)cc1	1.58446	0	0.2149	-0.2149	TN	0.0331	YES
-	3121	COc1ccc(CNC(=O)Nc2ncc([N+](=O)[O-])s2)cc1	17.2445	1	0.8079	0.1921	TP	0.0317	YES
#	2442	COC1CC(OC2C(C)=CCC3CC(CC4(CCC(C)C(C5CCCCC5)O4)O3)OC(=O)C3C=C(C)CC4OCC(=CC=CC2C)C43O)OC(C)C1O	-7.17537	0	-0.1167	0.1167	TN	0.0999	YES
#	3122	N#Cc1ccc2[nH]cc(CCCCN3CCN(c4ccc5oc(C(N)=O)cc5c4)CC3)c2c1	14.7734	1	0.7143	0.2857	TP	0.0688	YES
+	2220	Cc1ccc(N)cc1C(=O)NC(C)c1cccc2ccccc12	11.0215	0	0.5722	-0.5722	FP	0.0132	YES
-	3125	CCCN1CCN(c2ccc(C(=O)NC3(C(=O)NCC#N)CCCCC3)cc2)CC1	16.2164	1	0.7689	0.2311	TP	0.0399	YES
*	3861	Cc1oc(=O)oc1COC(=O)N1CCC(N2CCC(=CC3=C(C(=O)O)N4C(=O)C(NC(=O)C(N=O)=C5N=C(N)SN5)C4SC3)C2=O)C1	-13.6191	0	-0.3607	0.3607	TN	4.0976	No
*	3145	O=c1ccc2ccc(OCCCCN3CCN(c4cccc5sccc45)CC3)cc2[nH]1	26.4118	1	1.1549	-0.1549	TP	1.048	No
*	3425	CC1(C)OC(=O)C(OCC2CC2)=C1c1ccc(S(C)(=O)=O)cc1	-0.10621	0	0.1509	-0.1509	TN	0.027	YES
+	3147	CNC(C)C(=O)NC(C(=O)N1CCCC1c1nc(C(=O)c2ccc(F)cc2)cs1)C1CCCCC1	8.30527	1	0.4694	0.5306	FN	1.0411	No
*	1203	OC1COC2C(O)COC12	1.43398	0	0.2092	-0.2092	TN	0.011	YES
#	3148	COc1cc(NC(=O)Nc2cccc(CNC(=O)OC3CCOC3)c2)ccc1-c1cnco1	7.71157	1	0.4469	0.5531	FN	0.0496	YES
+	471	COc1ccc2c(c1)C(=O)N(CCc1ccc(S(=O)(=O)NC(=O)NC3CCCCC3)cc1)C(=O)C2(C)C	12.5492	0	0.6301	-0.6301	FP	0.0416	YES
*	3155	Cc1ncc(NC(=O)c2ccc(CN3CCN(C)CC3)c(C(F)(F)F)c2)cc1Nc1nccc(-c2cccnc2)n1	18.7172	1	0.8636	0.1364	TP	0.0689	YES
+	3479	COc1cc2c(cc1F)C(c1ccccc1Cl)=NC1C(C)=NNC1=N2	-5.10977	0	-0.0385	0.0385	TN	5.0393	No
*	3170	CCCC(NC1CCc2cc(F)cc(F)c2C1)C(=O)Nc1cn(C(C)(C)CNCC(C)(C)C)cn1	13.7346	1	0.675	0.325	TP	0.0404	YES
+	318	OCc1ccc(-c2nn(Cc3ccccc3)c3ccccc23)o1	4.96834	0	0.343	-0.343	TN	2.0405	No
#	3205	COc1cccc(N2CCN(C3=Nc4c(F)cccc4C(CC(=O)O)N3c3cc(C(F)(F)F)ccc3OC)CC2)c1	21.3473	1	0.9632	0.0368	TP	0.0679	YES
*	2731	Cc1cc2nc3c(=O)[nH]c(=O)nc-3n(CC(O)C(O)C(O)COP(=O)(O)OP(=O)(O)OCC3OC(n4cnc5c(N)ncnc54)C(O)C3O)c2cc1C	-1.08081	0	0.114	-0.114	TN	0.1061	YES
*	3208	O=C1NC(=O)C(c2cnc3ccccn23)=C1c1cn2c3c(cc(F)cc13)CN(C(=O)N1CCCCC1)CC2	1.37923	1	0.2072	0.7928	FN	0.0606	YES
-	2019	CN1C(CSCC(F)(F)F)Nc2cc(Cl)c(S(N)(=O)=O)cc2S1(=O)=O	4.86334	0	0.3391	-0.3391	TN	1.0534	No
*	3212	Cn1cc(-c2cc(Oc3cc(F)c(NC(=O)C4(C(=O)Nc5ccccc5)CC4)cc3F)ccn2)cn1	11.8632	1	0.6041	0.3959	TP	0.0812	YES
*	2644	O=C(O)C(S)C(S)C(=O)O	0.14977	0	0.1606	-0.1606	TN	0.018	YES
#	3224	C=CC1(C)CC(OC(=O)CSC2CC3CCC(C2)N3C)C2(C)C(C)CCC3(CCC(=O)C32)C(C)C1O	17.2267	1	0.8072	0.1928	TP	0.0507	YES
-	1926	CC(C)c1cc2c(cc1S(=O)(=O)O)C1(C)CCCC(C)(C(=O)O)C1CC2	8.9901	0	0.4953	-0.4953	TN	0.0273	YES
+	3239	CS(=O)(=O)N1CCC(NC(=O)c2[nH]ncc2NC(=O)c2c(Cl)cccc2Cl)CC1	-1.68969	1	0.091	0.909	FN	3.0335	No
+	3198	CC(C)NC(=O)COc1cccc(-c2nc(Nc3ccc4n[nH]cc4c3)c3ccccc3n2)c1	6.13983	0	0.3874	-0.3874	TN	0.0531	YES
+	3246	CCCCCOc1ccc(-c2ccc(-c3ccc(C(=O)NC4CC(O)C(O)NC(=O)C5C(O)C(C)CN5C(=O)C(C(C)O)NC(=O)C(C(O)C(O)c5ccc(O)cc5)NC(=O)C5CC(O)CN5C(=O)C(C(C)O)NC4=O)cc3)cc2)cc1	31.0555	1	1.3308	-0.3308	TP	7.1353	No
#	333	Cc1cc(C(=O)NNCc2ccccc2)no1	-4.67796	0	-0.0222	0.0222	TN	0.0186	YES
+	3251	CCCC1(CCC)CCC2(CCN(CCCN(CC)CC)C2)CC1	7.20333	1	0.4277	0.5723	FN	0.0197	YES
+	2364	O=C1CN2CCOC2(c2ccccc2Cl)c2cc(Cl)ccc2N1	5.76813	0	0.3733	-0.3733	TN	3.0229	No
*	3252	CC1(C)CN2C(CSC(=NC3CCCCC3)NC3CCCCC3)=CSC2=N1	4.86982	1	0.3393	0.6607	FN	1.0513	No
+	3196	CN(C)C1(c2ccccc2)CCC2(CC1)OCCc1c2[nH]c2ccc(F)cc12	20.1166	0	0.9166	-0.9166	FP	0.027	YES
+	3266	CON(C)C(=O)N1N=C(c2cc(F)ccc2F)SC1(CCCN)c1ccccc1	25.31	1	1.1132	-0.1132	TP	4.0405	No
+	478	COc1ccc2c(c1)c(CC(=O)OCC(=O)O)c(C)n2C(=O)c1ccc(Cl)cc1	-2.22273	0	0.0708	-0.0708	TN	0.0342	YES
#	3278	Cc1nc(C)c(CN2CCN(C(c3ccc(F)cc3)c3ccc(F)cc3)CC2)nc1C	13.3241	1	0.6594	0.3406	TP	0.0333	YES
+	3372	CC(CN(C)C)Oc1nc(Nc2cc3cccc(Cl)c3cn2)cnc1C#N	2.89105	0	0.2644	-0.2644	TN	1.0398	No
*	3286	Nc1ncnc2c1c(-c1cccc(OCc3ccccc3)c1)cn2C1CC(CN2CCCC2)C1	10.0101	1	0.5339	0.4661	TP	0.0478	YES
-	1703	COc1ccc(CN(CCN(C)C)c2ncccn2)cc1	10.4379	0	0.5501	-0.5501	FP	0.027	YES
+	3297	Cc1cncc(CN2CCC(=C3c4ccc(Cl)cc4CCc4cccnc43)CC2)c1	12.504	1	0.6284	0.3716	TP	0.0523	YES
#	335	NC(Cc1ccc(O)c(O)c1)C(=O)O	-3.51419	0	0.0219	-0.0219	TN	0.0103	YES
#	3302	Cn1nc(C(C)(C)C)cc1C(=O)NC(Cc1cccc(Cl)c1)C(=O)NCC#N	17.013	1	0.7991	0.2009	TP	0.0389	YES
*	2675	NCC(=O)Nc1cncc(-c2nn3c(=O)cc(N4CCNCC4)nc3s2)c1	-2.83963	0	0.0474	-0.0474	TN	3.0562	No
+	3312	CCC(C)Nc1cc(C(=O)NC2CC3CCC(C2)N3c2ccc(C(=O)C3CC3)cn2)c(C)cc1C(N)=O	11.1753	1	0.5781	0.4219	TP	0.0509	YES
-	818	C=Cc1ccccc1	6.83266	0	0.4136	-0.4136	TN	0.0028	YES
-	3322	CNCc1ccc(-c2cc(-c3nc(-c4ccc(S(=O)(=O)C(C)C)cc4)cnc3N)on2)cc1	16.7832	1	0.7904	0.2096	TP	0.0752	YES
#	2603	CCOC(=O)C(CCc1ccccc1)NC(C)C(=O)N1Cc2cc(OC)c(OC)cc2CC1C(=O)O	8.0946	0	0.4614	-0.4614	TN	0.0297	YES
-	3327	CC(NC(=O)C(Cc1ccccc1)NC(=O)OCc1ccccc1)C(=O)CF	10.1732	1	0.5401	0.4599	TP	0.0247	YES
-	3738	CNS(=O)(=O)Nc1nccc(Cc2c(C)c3ccc(Oc4ncccn4)cc3oc2=O)c1F	3.07947	0	0.2715	-0.2715	TN	3.0595	No
-	3331	OCCOc1ccc(C(=C(CCCl)c2ccccc2)c2ccccc2)cc1	17.0137	1	0.7991	0.2009	TP	2.0203	No
#	1943	CC(C)=CCCC(C)=CCCC(C)=CCC/C(C)=C/CC1=C(C)C(=O)c2ccccc2C1=O	3.22355	0	0.277	-0.277	TN	0.0382	YES
#	3338	CC(C)(C)c1ccc(CN2CCN(C(c3ccccc3)c3ccc(Cl)cc3)CC2)cc1	18.8503	1	0.8687	0.1313	TP	0.026	YES
+	1697	CCC1OC(=O)C(C)C(OC2CC(C)(OC)C(O)C(C)O2)C(C)C(OC2OC(C)CC(N(C)C)C2O)C(C)(OC)CC(C)C(=O)C(C)C(O)C1(C)O	18.6438	0	0.8608	-0.8608	FP	0.0556	YES
#	3348	Cc1nc2ccc(-n3ncc(C(=O)c4cc5ccccc5[nH]4)c3N)cc2[nH]1	13.2021	1	0.6548	0.3452	TP	0.0576	YES
*	1809	C[N+]1(C)CCC(OC(=O)C(O)(c2ccccc2)C2CCCC2)C1	-0.34769	0	0.1418	-0.1418	TN	0.0194	YES
#	3356	Nc1nc(Nc2ccc3c(c2)CCC(N2CCCC2)CC3)nn1-c1cc2c(nn1)-c1ccccc1CCC2	15.8854	1	0.7564	0.2436	TP	0.0626	YES
#	1176	O=C1CCCC2CCCC=[N+](O)CCCCCN12	1.71665	0	0.2199	-0.2199	TN	0.0156	YES
*	3359	CCCCCCCCCC(=O)OCCN1CCN(CCCN2c3ccccc3Sc3ccc(C(F)(F)F)cc32)CC1	29.1571	1	1.2589	-0.2589	TP	0.0613	YES
+	3856	Cc1[nH]ncc1-c1cc2[nH]c(C3CC4CCN3CC4)nc(=O)c2s1	0.01921	0	0.1557	-0.1557	TN	2.0538	No
-	3361	CC(C)(CNC(=O)c1cccc(-c2noc(C(F)(F)F)n2)c1)c1coc(-c2ccccc2)n1	18.0185	1	0.8372	0.1628	TP	0.0669	YES
*	2707	O=C1OC(CO)C(O)C(O)C1O	-2.15671	0	0.0733	-0.0733	TN	0.0114	YES
-	3368	CC(C=CC1CC1(C)c1ccc2c(c1)C(C)(C)CCC2(C)C)=CC(=O)O	8.56187	1	0.4791	0.5209	FN	0.0257	YES
#	2139	COc1ccc(CNCC(O)COc2ccc3[nH]c(=O)ccc3c2)cc1OC	6.0949	0	0.3857	-0.3857	TN	0.0199	YES
#	3370	CC#CC(CC(=O)O)c1ccc(OCc2cccc(-c3ccc(C(F)(F)F)cc3)c2)cc1	22.667	1	1.0132	-0.0132	TP	0.0424	YES
#	1196	CC(C=CC=C(C)C(=O)OC1OC(COC2OC(CO)C(O)C(O)C2O)C(O)C(O)C1O)=CC=CC=C(C)C=CC=C(C)C(=O)OC1OC(COC2OC(CO)C(O)C(O)C2O)C(O)C(O)C1O	-8.3997	0	-0.1631	0.1631	TN	0.0781	YES
-	3381	Fc1ccc(-c2[nH]c(-c3ccccc3F)nc2-c2ccncc2)cc1	17.6548	1	0.8234	0.1766	TP	0.0329	YES
#	2093	CN(C)c1ccc(O)c2c1CC1CC3C(N(C)C)C(=O)C(C(N)=O)C(=O)C3(O)C(O)=C1C2=O	4.29025	0	0.3174	-0.3174	TN	0.0452	YES
*	3382	O=C(CCCN1CCC(n2c(=S)[nH]c3ccccc32)CC1)c1ccc(F)cc1	15.5892	1	0.7452	0.2548	TP	0.0407	YES
*	1285	CC(=O)C1CCC2C3CC=C4CC(O)CCC4(C)C3CCC12C	-9.37774	0	-0.2001	0.2001	TN	1.0339	No
*	3384	Clc1cc2c(NC3CCCC3)nnc(-c3ccncc3)c2cc1Cl	20.7082	1	0.939	0.061	TP	0.0398	YES
-	3405	COc1cc2c(=O)c(-c3ccc(O)cc3)coc2cc1OC1OC(CO)C(O)C(O)C1O	3.43143	0	0.2849	-0.2849	TN	0.0342	YES
-	3390	O=C(O)c1ccc(CCCc2ccc(OCCc3ccc(F)cc3)cc2)o1	14.9551	1	0.7212	0.2788	TP	1.0278	No
*	2869	Cc1cn(C2CC(O)C(CO)O2)c(=O)[nH]c1=O	-3.33904	0	0.0285	-0.0285	TN	0.0267	YES
*	3398	CN1CCC(c2c(O)cc(O)c3c(=O)cc(-c4ccc(C(F)(F)F)cc4Cl)oc23)C1CO	4.00073	1	0.3064	0.6936	FN	1.0608	No
#	3347	CNC(=O)c1cc(Oc2ccc3nc(NC4CCCCC4O)sc3c2)ccn1	6.22675	0	0.3907	-0.3907	TN	0.04	YES
-	3411	O=C(Nc1ncc([N+](=O)[O-])s1)c1ccccc1O	17.0635	1	0.801	0.199	TP	1.0271	No
+	2222	CC(=O)Oc1cc2c(s1)CCN(C(C(=O)C1CC1)c1ccccc1F)C2	7.39448	0	0.4349	-0.4349	TN	5.0338	No
*	3415	COc1cc(N2CCN(C)CC2)ccc1Nc1nccc(-c2cn(C)c3cnccc23)n1	12.6761	1	0.6349	0.3651	TP	0.0459	YES
*	594	O=C1NC(=O)C(c2ccccc2)(c2ccccc2)N1	-0.22628	0	0.1464	-0.1464	TN	0.0187	YES
*	3463	CCCCNc1ncc2c(-c3ccc(CN4CCN(C)CC4)cc3)cn(C3CCC(O)CC3)c2n1	26.1638	1	1.1456	-0.1456	TP	0.0556	YES
#	3621	Cn1cc(-c2c[nH]c3ncnc(N4CCOCC4)c23)cn1	-8.81681	0	-0.1789	0.1789	TN	0.0455	YES
*	3464	COc1ccc(C(C)(C)C)cc1CNC1C2CCN(CC2)C1C(c1ccccc1)c1ccccc1	29.6268	1	1.2767	-0.2767	TP	0.0267	YES
+	2264	CC(C)(C)OC(=O)CN(Cc1ccc(Cl)cc1)Cc1ccc([N+](=O)[O-])s1	16.8373	0	0.7924	-0.7924	FP	0.0279	YES
#	3469	O=C1Nc2nc(-c3c(O)cccc3OCC3CC3)cc(C3CCCNC3)c2CO1	19.7017	1	0.9009	0.0991	TP	0.0507	YES
*	3573	CC(C)=CCCC(C)(OC1OC(COC2OCC(O)C(O)C2O)C(O)C(O)C1O)C1CCC2(C)C1C(O)CC1C3(C)CCC(OC4OC(CO)C(O)C(O)C4OC4OC(CO)C(O)C(O)C4O)C(C)(C)C3CCC12C	-0.40118	0	0.1397	-0.1397	TN	0.1046	YES
+	3475	CC(C)C(O)(c1ccc2cc(OC(F)F)c(OC(F)F)cc2c1)c1cn[nH]n1	9.70306	1	0.5223	0.4777	TP	0.035	YES
-	1621	COc1cc2c(cc1OC)C(=O)C(CC1CCN(Cc3ccccc3)CC1)C2	6.15723	0	0.3881	-0.3881	TN	0.023	YES
+	3483	O=C1NNc2nc(CN3Cc4ccccc4C3)nc3cccc1c23	26.8935	1	1.1732	-0.1732	TP	2.0541	No
+	1808	CC(=O)C1CCC2C3C=CC4=CC(=O)CCC4(C)C3CCC12C	2.81184	0	0.2614	-0.2614	TN	0.0379	YES
-	3508	CCCCCCCCCCCCCCCCOc1nc2ccc(C)cc2c(=O)o1	14.2289	1	0.6937	0.3063	TP	1.0289	No
+	2839	Nc1nc(N)c2nc(-c3cccc(O)c3)c(-c3cccc(O)c3)nc2n1	7.68061	0	0.4457	-0.4457	TN	0.0441	YES
-	3511	COCCNC(=O)Nc1ccc2nc(-c3cccs3)c(-c3cccs3)nc2c1	21.1977	1	0.9575	0.0425	TP	2.0507	No
-	27	O=C(O)CCc1nc(-c2ccccc2)c(-c2ccccc2)o1	7.13424	0	0.4251	-0.4251	TN	1.0307	No
+	3514	CC1CN(CC(=O)N2CC(C)(C)c3ncc(Cc4ccc(F)cc4)cc32)C(CN2CCOCC2C)CN1	15.0044	1	0.723	0.277	TP	0.0545	YES
*	3750	O=C1CC(c2c[nH]c3ccc(F)cc23)C(=O)N1	-0.23657	0	0.146	-0.146	TN	0.0253	YES
#	3525	CC1=C2CC3C(CCC4CC(NS(C)(=O)=O)CCC43C)C2CCC2(C1)OC1CC(C)CNC1C2C	20.4852	1	0.9306	0.0694	TP	0.0594	YES
*	3011	CC(C(C)N1CC(=O)NC(=O)C1)N1CC(=O)NC(=O)C1	-6.43147	0	-0.0886	0.0886	TN	0.0247	YES
*	3530	CCCCCCC(C)(C)c1cc(O)c2c(c1)OC(C)(C)C1CC=C(CO)CC21	18.3378	1	0.8492	0.1508	TP	0.0229	YES
-	3526	CCc1cc2c(c(OCC(F)(F)F)c(C(=O)NC3CCN(C(=O)CO)CC3)n2C)c(=O)n1CC(=O)c1ccccc1	4.72453	0	0.3338	-0.3338	TN	0.0571	YES
+	3532	COc1ccccc1C(=O)Nc1cc2c(cc1N1CCCC1)n(C)c(=O)n2C	6.37852	1	0.3964	0.6036	FN	1.0382	No
-	2259	Cc1cccc(-c2n[nH]cc2-c2ccc3ncccc3n2)n1	3.29512	0	0.2797	-0.2797	TN	0.0412	YES
*	3544	C=CC(=O)Nc1cccc(C)c1Nc1ncc2cc(-c3c(Cl)c(OC)cc(OC)c3Cl)ccc2n1	15.1275	1	0.7277	0.2723	TP	0.0482	YES
#	3227	CN(C)C(=O)NC1CCC(CCN2CCN(c3cccc(Cl)c3Cl)CC2)CC1	7.33528	0	0.4327	-0.4327	TN	0.0316	YES
-	3567	Cc1cc(C)c(CNC(=O)c2cc(-c3ccc(N4CCN(C)CC4)nc3)cc3c2c(C)cn3C(C)C)c(=O)[nH]1	15.5477	1	0.7436	0.2564	TP	2.0423	No
-	255	CCCn1cnc2c1c(=O)n(CCCCC(C)=O)c(=O)n2C	1.85241	0	0.2251	-0.2251	TN	0.0433	YES
*	3586	COc1nc(OCc2cccc(-c3ccccc3)c2C)ccc1CNCCNC(C)=O	18.5366	1	0.8568	0.1432	TP	0.0289	YES
+	2172	COC1C(O)C(N)C(OC2OC(C(C)N)CCC2N)C(O)C1N(C)C(=O)CN	0.04073	0	0.1565	-0.1565	TN	0.027	YES
*	3591	Nc1nc(OC(c2ccc(-c3cccc(F)c3)cc2)C(F)(F)F)cc(-c2ccc(CC(N)C(=O)O)cc2)n1	17.5552	1	0.8196	0.1804	TP	0.0547	YES
+	2327	Cc1ccc(-n2c(C)cc(-c3nnc4n3CCCCC4)c2C)cc1	0.96544	0	0.1915	-0.1915	TN	2.0415	No
#	3593	CCOC(=O)NC1CCC2C(C1)CC1C(=O)OC(C)C1C2C=Cc1ccc(-c2cccc(F)c2)cn1	23.3246	1	1.0381	-0.0381	TP	0.0382	YES
*	1401	CCOC(=O)OC(C)OC1=C(C(=O)Nc2ccccn2)N(C)S(=O)(=O)c2ccccc21	8.60385	0	0.4807	-0.4807	TN	0.0464	YES
*	3607	COCCNCc1ccc(-c2cc3nccc(Oc4ccc(NC(=S)NC(=O)Cc5ccc(F)cc5)cc4F)c3s2)nc1	39.6232	1	1.6552	-0.6552	TP	1.0818	No
+	1087	CC(=O)OC1CC2CCC1(C)C2(C)C	5.55664	0	0.3653	-0.3653	TN	0.0125	YES
+	3619	CC12CCC3c4ccc(OC(=O)N(CCCl)CCCl)cc4CCC3C1CCC2OP(=O)(O)O	14.4543	1	0.7022	0.2978	TP	5.0592	No
#	2499	CC(C)OC(=O)C1=CN(C(=O)c2ccc(F)c(F)c2)CC(C)(C)c2c1[nH]c1ccccc21	0.8859	0	0.1885	-0.1885	TN	0.0349	YES
+	3638	CCC(NC(=O)C(CS(=O)(=O)CC1CC1)NC(c1ccc(F)cc1)C(F)(F)F)C(=O)C(=O)NC1CC1	14.4964	1	0.7038	0.2962	TP	0.053	YES
#	3109	Nc1ncnc2c1c(COc1cccc(Cl)c1)nn2C1CCOCC1	-4.08241	0	0.0004	-0.0004	TN	0.0418	YES
+	3644	COc1ccc2c(c1)C1(CC1c1ccc3c(C=Cc4ccc(CN5CC(C)OC(C)C5)cc4)[nH]nc3c1)C(=O)N2	29.3728	1	1.2671	-0.2671	TP	3.0635	No
*	959	NC(=O)NC(=O)Cc1ccccc1	-1.60536	0	0.0942	-0.0942	TN	0.0088	YES
*	3653	Cn1ncc2cc(-c3cnc(N)c(Cl)c3N3CCC4(CCNC4=O)CC3)ccc21	19.5228	1	0.8941	0.1059	TP	0.0661	YES
#	3191	C[N+]1(CC2CC2)CCC23c4c5ccc(O)c4OC2C(=O)CCC3(O)C1C5	6.42768	0	0.3983	-0.3983	TN	0.0494	YES
+	3685	CC(C)CC1C(=O)OC(Cc2ccc(N3CCOCC3)cc2)C(=O)N(C)C(CC(C)C)C(=O)OC(C)C(=O)N(C)C(CC(C)C)C(=O)OC(Cc2ccc(N3CCOCC3)cc2)C(=O)N(C)C(CC(C)C)C(=O)OC(C)C(=O)N1C	20.3871	1	0.9268	0.0732	TP	0.0893	YES
*	3379	Cc1c(-c2cnccn2)ssc1=S	8.38451	0	0.4724	-0.4724	TN	0.0388	YES
-	3708	COc1cc(N2CCN(C)CC2)ccc1Nc1ncc2c(n1)N(C)c1ccccc1C(=O)N2	6.34394	1	0.3951	0.6049	FN	0.0368	YES
*	2921	CC1C(=O)OC2CC34C5CC(C(C)(C)C)C36C(OC(=O)C6O)OC4(C(=O)O5)C21O	-5.40019	0	-0.0495	0.0495	TN	3.048	No
+	3714	CC(C)(O)CNc1ncc(-c2ccnc(Nc3ccncc3)n2)c(CC2CC2)n1	3.37436	1	0.2827	0.7173	FN	0.0564	YES
*	3342	COC(=O)CCC(CC(=O)C(CC(=O)OC)NC(=O)OCc1ccccc1)C(=O)NC(C(=O)NC(CC(=O)OC)C(=O)CF)C(C)C	-1.92143	0	0.0822	-0.0822	TN	0.042	YES
+	3721	CC1(C)C(=O)N(c2ccc(C#N)c(C(F)(F)F)c2)C(=S)N1Cc1ccc(-c2cn[nH]n2)cc1	4.64509	1	0.3308	0.6692	FN	0.0607	YES
#	3407	CC12C=CC(=O)C=C1CCC1C2C(O)CC2(C)C1CCC2(O)C(=O)COP(=O)(O)O	2.40095	0	0.2458	-0.2458	TN	0.0444	YES
-	3725	CCc1ccc(N(CC(C)C)S(=O)(=O)c2ccc(OCC3CCOCC3)c(CO)c2)cc1	12.087	1	0.6126	0.3874	TP	0.0325	YES
+	1162	COCCCOc1ccnc(CS(=O)c2nc3ccccc3[nH]2)c1C	9.7304	0	0.5234	-0.5234	FP	0.0316	YES
*	3732	c1ccc2c(-c3cnn4cc(-c5ccc(OCCN6CCOCC6)cc5)cnc34)ccnc2c1	29.8705	1	1.2859	-0.2859	TP	0.0715	YES
#	170	N=C(N)NCc1cccc(I)c1	8.2538	0	0.4674	-0.4674	TN	0.0338	YES
#	3739	CCCCCCCC(=O)NC(CN1CCCC1)C(O)c1ccc2c(c1)OCCO2	15.4669	1	0.7405	0.2595	TP	0.0287	YES
-	3044	N=C1SC(=Cc2ccc(-c3ccc4c(c3)C(=O)NC4=O)o2)C(=O)N1c1ccc(Br)cc1	4.77653	0	0.3358	-0.3358	TN	3.059	No
+	3742	C=CC(=O)NC1CCOCC1Nc1ncc2cc(-c3c(Cl)c(OC)cc(OC)c3Cl)ccc2n1	11.7557	1	0.6	0.4	TP	0.0497	YES
+	1694	O=C(O)c1cn(-c2ccc(F)cc2)c2cc(N3CCNCC3)c(F)cc2c1=O	9.33296	0	0.5083	-0.5083	FP	0.048	YES
#	3747	Cn1cc(-c2ccc(-c3cncc(Cl)c3N3CCC4(CCNC4=O)CC3)cc2)cn1	20.0142	1	0.9127	0.0873	TP	0.0679	YES
+	972	O=C(OCC(O)CO)c1ccccc1Nc1ccnc2cc(Cl)ccc12	11.9296	0	0.6066	-0.6066	FP	0.0213	YES
*	3755	CONC(=O)Nc1ccc(-c2sc3c(c2CN(C)Cc2ccccc2)c(=O)n(-c2ccccc2)c(=O)n3Cc2c(F)cccc2F)cc1	34.4274	1	1.4584	-0.4584	TP	2.0759	No
*	1326	C=CCC1=C(C)C(OC(=O)C2C(C=C(C)C)C2(C)C)CC1=O	6.99879	0	0.4199	-0.4199	TN	0.0257	YES
-	3759	c1ccc(-c2cc(CCC3CCNCC3)c3ccccc3n2)cc1	17.9975	1	0.8364	0.1636	TP	0.0348	YES
#	1574	COc1cc2c(cc1OC)C(Cc1cc(OC)c(OC)c(OC)c1)[N+](C)(CCCOC(=O)CCC=CCCC(=O)OCCC[N+]1(C)CCc3cc(OC)c(OC)cc3C1Cc1cc(OC)c(OC)c(OC)c1)CC2	-2.9676	0	0.0426	-0.0426	TN	0.0524	YES
+	3776	COc1cc(C(=O)NC(=N)Nc2ccc(C)c(NC(=O)c3ccc(-c4ccccc4)cc3)c2)cc(OC)c1OC	16.215	1	0.7689	0.2311	TP	0.0558	YES
*	2180	COC(=O)CCc1ccc(OCC(O)CNC(C)C)cc1	8.92747	0	0.493	-0.493	TN	0.0144	YES
#	3779	CC(C(=O)Nc1ccc(Cl)cc1)C1CCC(c2ccnc3ccc(F)cc23)CC1	13.3863	1	0.6618	0.3382	TP	0.0392	YES
#	3088	CCCOc1ccn2c(C(C)=O)cc(-c3ccccc3S(C)(=O)=O)c2c1	11.2606	0	0.5813	-0.5813	FP	0.0394	YES
+	3794	Cc1cc2cc(Oc3ccnc(Nc4cccc(CS(=O)(=O)NCCN(C)C)c4)n3)ccc2[nH]1	13.6376	1	0.6713	0.3287	TP	1.0509	No
+	2878	FC(F)(F)c1ccc(C=Cc2nc(COc3ccc(CCCCn4ccnn4)cc3)co2)cc1	-3.22584	0	0.0328	-0.0328	TN	4.062	No
+	3795	O=C(C=Cc1ccc(Cl)cc1)N1CCC2(CC1)CN(Cc1ccc(Cl)c(Cl)c1)C(=O)O2	8.71683	1	0.485	0.515	FN	0.0411	YES
*	3112	O=C(C=CN1CC2CC1CN2c1ccccn1)c1ccccc1O	7.22042	0	0.4283	-0.4283	TN	0.0258	YES
-	3806	Cc1cc(OC(CCC(F)(F)F)c2ccc(C(=O)NCCC(=O)O)cc2)cc(C)c1-c1ccc(C(C)(C)C)cc1	21.0914	1	0.9535	0.0465	TP	0.0446	YES
#	726	CC(=O)c1c(O)c(C)c(O)c(Cc2c(O)c3c(c(C(=O)C=Cc4ccccc4)c2O)OC(C)(C)C=C3)c1O	6.35857	0	0.3957	-0.3957	TN	0.0505	YES
*	3809	CCNCCc1ccc(CN(CC)c2cc(OC)ccc2C2CCc3cc(O)ccc3C2)cc1	20.0672	1	0.9147	0.0853	TP	0.0263	YES
*	3641	CC(C)c1c(-c2ccccc2)[nH]c2c(C#N)cnn2c1=O	1.50777	0	0.212	-0.212	TN	0.0392	YES
*	3823	CC1CC(N)CC(c2ccncc2NC(=O)c2ccc(F)c(-c3c(F)cccc3F)n2)C1	15.2428	1	0.7321	0.2679	TP	0.0431	YES
+	425	O=C(CCCN1CCN(c2ccccn2)CC1)c1ccc(F)cc1	8.57328	0	0.4795	-0.4795	TN	0.031	YES
-	3840	CC1=C(c2ccc(O)cc2)C(c2ccc(OCCN3CCCCC3)cc2)Oc2cc(O)ccc21	15.4382	1	0.7395	0.2605	TP	0.0475	YES
-	732	COc1cc(CC2C(=O)OCC2Cc2ccc(OC)c(OC)c2)ccc1O	6.63452	0	0.4061	-0.4061	TN	1.0161	No
-	3841	CCN(CC)CCNc1ccc(C)c2sc3ccccc3c(=O)c12	16.5838	1	0.7828	0.2172	TP	0.0372	YES
-	2870	O=C(Nc1c(Cl)cncc1Cl)c1ccc(OC(F)F)c(OCC2CC2)c1	6.80678	0	0.4127	-0.4127	TN	0.0362	YES
+	3848	CC(C)(O)C1CCC(Nc2ccc3ncc(-c4cccc(C(F)(F)F)c4)n3n2)CC1	16.9152	1	0.7954	0.2046	TP	1.065	No
-	173	O=C1N(c2ccccc2)c2ccccc2C1(Cc1ccncc1)Cc1ccncc1	7.58875	0	0.4423	-0.4423	TN	0.03	YES
+	3913	Cc1cc(O)ccc1C(C)(C)C	6.67534	1	0.4077	0.5923	FN	0.0065	YES
-	2774	CN(C)CC(C)(C)CNc1nn2c(-c3ccccc3)nnc2cc1C1CCC1	5.45927	0	0.3616	-0.3616	TN	1.0468	No
*	3951	Cc1ccc(NCCN(C)CCNc2ccnc3cc(Cl)ccc23)c2c(=O)c3ccccc3sc12	25.0934	1	1.105	-0.105	TP	2.0453	No
*	194	CCOC(=O)Nc1c[n+](N2CCOCC2)no1	-6.58086	0	-0.0942	0.0942	TN	0.0306	YES
#	3953	CCCCOCCOc1ccc(-c2ccc3c(c2)/C=C(/C(=O)Nc2ccc(S(=O)Cc4cncn4CCC)cc2)CCCN3CC(C)C)cc1	10.3958	1	0.5485	0.4515	TP	0.0647	YES
+	1686	Oc1cc(O)cc(C=Cc2ccc(O)cc2O)c1	10.0143	0	0.5341	-0.5341	FP	0.0178	YES
*	3954	N#CC1(c2ccc3c(N)ncnn23)OC(CO)C(O)C1O	-0.23682	1	0.146	0.854	FN	0.0432	YES
#	829	O=C(O)c1cc(O)c(O)c(O)c1	-8.69393	0	-0.1742	0.1742	TN	0.0079	YES
*	3956	CCC(CC)COC(=O)C(C)NP(=O)(OCC1OC(C#N)(c2ccc3c(N)ncnn23)C(O)C1O)Oc1ccccc1	1.08071	1	0.1959	0.8041	FN	0.0708	YES
+	2895	COc1cccc(Nc2c(C(N)=O)cnc3c(C)cc(S(=O)(=O)c4cccc(C(=O)N(C)C)c4)cc23)c1	5.23414	0	0.3531	-0.3531	TN	0.0527	YES

## Sheet: Table S6
Set	ID	SMILES	DCW	Expr	Calc	Expr-Calc	Class	DefectSMILES	Applicability
#	6	CN1CCN(CCCN2c3ccccc3Sc3ccc(C(F)(F)F)cc32)CC1	23.0106	1	1.1304	-0.1304	TP	0.0439	YES
-	2933	CCc1c(O)cc(O)c(C(=O)c2ccc(OCCN3CCOCC3)c(OC)c2)c1CC(=O)N(CCOC)CCOC	7.84605	0	0.5143	-0.5143	FP	0.0607	YES
#	10	CN1C2CCC1CC(OC(c1ccccc1)c1ccccc1)C2	13.7493	1	0.7542	0.2458	TP	0.0352	YES
+	2255	Clc1ccc2ncc(-c3cccc(NC4CNC4)n3)n2c1	4.22178	0	0.3671	-0.3671	TN	2.0474	No
#	13	CN(C)CCC=C1c2ccccc2Sc2ccc(Cl)cc21	18.4304	1	0.9443	0.0557	TP	0.0451	YES
*	526	O=c1c(O)c(-c2ccc(O)c(O)c2)oc2cc(O)ccc12	0.01276	0	0.1961	-0.1961	TN	1.0361	YES
+	15	c1cc(-c2sc(-c3ccncc3)c(-c3ccncc3)c2-c2ccncc2)ccn1	18.9069	1	0.9637	0.0363	TP	1.0525	YES
*	1011	CCCc1nc(C(C)(C)O)c(C(=O)OCc2oc(=O)oc2C)n1Cc1ccc(-c2ccccc2-c2nn[nH]n2)cc1	-4.15435	0	0.0268	-0.0268	TN	1.0791	YES
#	16	CN(C)CCC=C1c2ccccc2C=Cc2ccccc21	17.3516	1	0.9005	0.0995	TP	0.0331	YES
+	3489	C=C1C(=O)OC2C1CCC1(C)OC13CC=C(C)C23	6.15801	0	0.4457	-0.4457	TN	2.0342	No
*	20	CN(C)c1ccccc1CN1CCCN(Cc2ccccc2N(C)C)C1c1ccncc1	16.8687	1	0.8809	0.1191	TP	0.0399	YES
#	3674	NC(=O)c1cnc2[nH]ccc2c1NC1C2CC3CC1CC(O)(C3)C2	-0.0893	0	0.1919	-0.1919	TN	0.0502	YES
#	21	CN1CCC(CN2c3ccccc3Sc3ccccc32)C1	21.1776	1	1.056	-0.056	TP	0.0341	YES
+	3468	CC(c1nc(-c2ccc(C#N)cc2)cs1)C(O)(Cn1cncn1)c1cc(F)ccc1F	8.07077	0	0.5234	-0.5234	FP	1.076	YES
*	22	CNCCC=C1c2ccccc2CCc2ccccc21	16.3543	1	0.86	0.14	TP	0.0297	YES
+	660	CCC(CO)NC(=O)C1C=C2c3cccc4c3c(cn4C)CC2N(C)C1	-0.00269	0	0.1954	-0.1954	TN	0.0489	YES
-	25	O=C1CSC2(CCN(CCCN3c4ccccc4Sc4ccc(Cl)cc43)CC2)N1	15.0112	1	0.8054	0.1946	TP	2.073	No
#	1568	CC(=O)NCCCS(=O)(=O)O	-4.69484	0	0.0048	-0.0048	TN	0.0319	YES
-	34	Clc1ccc2c(c1)C(N1CCNCC1)=Nc1ccccc1O2	10.0976	1	0.6058	0.3942	TP	3.045	No
*	1491	O=Cc1ccccc1C=O	2.91696	0	0.3141	-0.3141	TN	0.0187	YES
#	56	CN(C)CCC=C1c2ccccc2CCc2ccccc21	16.5695	1	0.8687	0.1313	TP	0.0298	YES
*	439	Cc1c(-c2ccccc2)oc2c(C(=O)OCCN3CCCCC3)cccc2c1=O	-0.22525	0	0.1864	-0.1864	TN	1.0463	YES
+	57	CCCCc1oc2ccccc2c1C(=O)c1cc(I)c(OCCN(CC)CC)c(I)c1	10.6282	1	0.6274	0.3726	TP	0.059	YES
*	1916	O=C(CC1NCCCC1O)Cn1cnc2cc(Br)c(Cl)cc2c1=O	1.57288	0	0.2594	-0.2594	TN	0.0759	YES
#	72	CC(C)COCC(CN(Cc1ccccc1)c1ccccc1)N1CCCC1	17.6362	1	0.9121	0.0879	TP	0.0323	YES
#	2136	C=CC[N+]1(C2CC3C4CCC5CC(OC(C)=O)C(N6CCCCC6)CC5(C)C4CCC3(C)C2OC(=O)CC)CCCCC1	3.53956	0	0.3394	-0.3394	TN	0.1033	YES
+	99	CN1CCC(=C2c3ccccc3C=Cc3ccccc32)CC1	12.0945	1	0.6869	0.3131	TP	0.0372	YES
*	2186	O=C1CCCC(=O)C1=C(O)c1ccc(C(F)(F)F)cc1[N+](=O)[O-]	2.7069	0	0.3055	-0.3055	TN	0.0385	YES
*	100	CN1CCN(C2=Nc3cc(Cl)ccc3Nc3ccccc32)CC1	11.109	1	0.6469	0.3531	TP	2.045	No
*	2668	CCCC(=O)OC1(C(=O)CO)CCC2C3CCC4=CC(=O)CCC4(C)C3C(O)CC21C	-1.1199	0	0.15	-0.15	TN	0.0483	YES
+	101	CCN(CC)CCCC(C)Nc1ccnc2cc(Cl)ccc12	6.34154	1	0.4532	0.5468	FN	0.03	YES
+	3487	S=C(OC1CC2CC1C1CCCC21)S[K]	0.56183	0	0.2184	-0.2184	TN	2.0299	No
*	104	CN(C)CCCN1c2ccccc2CCc2ccc(Cl)cc21	14.4457	1	0.7825	0.2175	TP	0.0403	YES
#	3319	COC1C=COC2(C)Oc3c(C)c(O)c4c(O)c(c(C=NN5CCN(C6CCCC6)CC5)c(O)c4c3C2=O)NC(=O)C(C)=CC=CC(C)C(O)C(C)C(O)C(C)C(OC(C)=O)C1C	-2.64738	0	0.088	-0.088	TN	0.1375	YES
*	106	CN(C)CCCN1c2ccccc2Sc2ccc(Cl)cc21	16.9348	1	0.8836	0.1164	TP	0.0471	YES
#	1106	CC(C)(O)C(Cl)(Cl)Cl	-3.93846	0	0.0355	-0.0355	TN	0.025	YES
*	116	CNCCCN1c2ccccc2CCc2ccccc21	14.8588	1	0.7992	0.2008	TP	0.0316	YES
+	1801	CC1CC2C3CCC4=CC(=O)C=CC4(C)C3(Cl)C(O)CC2(C)C1(O)C(=O)CO	2.05353	0	0.279	-0.279	TN	1.0494	YES
-	121	CCN(CC)CCOC(=O)C1(C2CCCCC2)CCCCC1	8.83446	1	0.5545	0.4455	TP	0.0257	YES
#	1410	CC(C)(C)C(=O)OCOP(=O)(COCCn1cnc2c(N)ncnc21)OCOC(=O)C(C)(C)C	-8.94007	0	-0.1677	0.1677	TN	0.0681	YES
+	129	O=c1c2ccccc2[se]n1-c1ccccc1	10.9614	1	0.6409	0.3591	TP	2.0283	No
#	2832	CC(C)(C)OC(=O)NC1CCCCCC=CC2CC2(C(=O)NS(=O)(=O)C2CC2)NC(=O)C2CC(OC(=O)N3Cc4cccc(F)c4C3)CN2C1=O	3.97772	0	0.3572	-0.3572	TN	0.125	YES
+	133	CNCCC(Oc1ccc(C(F)(F)F)cc1)c1ccccc1	9.07334	1	0.5642	0.4358	TP	0.0289	YES
#	722	CCOC(=O)C(C#N)C1c2cc(Br)ccc2OC(=N)C1C(=O)OCC	7.03193	0	0.4812	-0.4812	TN	0.0858	YES
*	152	O=C1Nc2ccc(I)cc2C1=Cc1cc(Br)c(O)c(Br)c1	22.0038	1	1.0895	-0.0895	TP	0.0948	YES
+	2652	CCOc1ccc2ccccc2c1C(=O)NC1C(=O)N2C1SC(C)(C)C2C(=O)O	2.52163	0	0.298	-0.298	TN	0.0638	YES
#	166	O=S(=O)(c1cccc2c(I)cccc12)N1CCCNCC1	15.8419	1	0.8392	0.1608	TP	0.045	YES
*	548	CC=C(C(=CC)c1ccc(O)cc1)c1ccc(O)cc1	4.60249	0	0.3825	-0.3825	TN	0.0275	YES
*	169	CN(C)CCCN1c2ccccc2CCc2ccccc21	15.0739	1	0.808	0.192	TP	0.0318	YES
-	1284	Clc1ccc(-c2nc3sccn3c2C=NOCc2ccc(Cl)c(Cl)c2)cc1	6.58001	0	0.4629	-0.4629	TN	9.0629	No
-	177	CCCc1c(OCCCOc2ccc(OCC(=O)O)cc2)ccc(C(C)=O)c1O	8.42894	1	0.538	0.462	TP	0.0442	YES
*	922	O=c1[nH]c(=O)n(C2CC(O)C(CO)O2)cc1C=CBr	9.07231	0	0.5641	-0.5641	FP	0.0498	YES
*	181	CN(C)C(=O)C(CCN1CCC(O)(c2ccc(Cl)cc2)CC1)(c1ccccc1)c1ccccc1	14.3288	1	0.7777	0.2223	TP	0.0532	YES
*	368	O=[N+]([O-])c1cc([As](=O)(O)O)ccc1O	-0.07402	0	0.1925	-0.1925	TN	0.0289	YES
+	185	CCOC(=O)N1CCC(=C2c3ccc(Cl)cc3CCc3cccnc32)CC1	8.20095	1	0.5287	0.4713	TP	0.0463	YES
*	2272	CC(=CC(=O)Nc1ccccc1C(=O)O)c1ccc2ccccc2c1	-1.94741	0	0.1164	-0.1164	TN	0.0358	YES
-	208	CNCCCC12CCC(c3ccccc31)c1ccccc12	9.89558	1	0.5976	0.4024	TP	0.022	YES
#	42	NCCCC(=O)O	-2.6815	0	0.0866	-0.0866	TN	0.0074	YES
*	212	COc1ccccc1N1CCN(CC(O)COc2cccc3ccccc23)CC1	16.2307	1	0.855	0.145	TP	0.0451	YES
#	2696	CCCCCC=CCC=CCCCCCCCC(=O)O	2.27611	0	0.288	-0.288	TN	0.0251	YES
-	216	COC(=O)C1=C(C)NC(C)=C(C(=O)OCCN(C)Cc2ccccc2)C1c1cccc([N+](=O)[O-])c1	11.6521	1	0.669	0.331	TP	0.0483	YES
-	2246	COc1cc2c(N3CCN(C(=O)Nc4ccc(OC(C)C)cc4)CC3)ncnc2cc1OCCCN1CCCCC1	8.84466	0	0.5549	-0.5549	FP	0.0764	YES
-	222	CCN(CC)CC#CCOC(=O)C(O)(c1ccccc1)C1CCCCC1	17.7161	1	0.9153	0.0847	TP	0.0484	YES
*	3420	NC1=NC(=O)N2CC12	-8.63602	0	-0.1553	0.1553	TN	0.0211	YES
-	223	Cc1ccccc1C(OCCN(C)C)c1ccccc1	11.8167	1	0.6756	0.3244	TP	0.0199	YES
#	2296	COc1ccc(C=CC(=O)O)cc1O	-0.17207	0	0.1886	-0.1886	TN	0.025	YES
+	224	O=c1[nH]c2ccccc2n1CCCN1CCN(C(c2ccccc2)c2ccccc2)CC1	16.7879	1	0.8776	0.1224	TP	0.0528	YES
*	3423	CCC1OC(=O)C(C)C(=O)C(C)C(OC2OC(C)CC(N(C)C)C2O)C(C)(OC)CC(C)C(=O)C(C)C2N(CCCCn3cnc(-c4cccnc4)c3)C(=O)OC12C	9.82092	0	0.5946	-0.5946	FP	1.1123	No
*	233	CC(CN1c2ccccc2Sc2ccccc21)N(C)C	11.4609	1	0.6612	0.3388	TP	0.0414	YES
*	1817	NCC1OC(OC2C(N)CC(N)C(OC3OC(CO)C(O)C(N)C3O)C2O)C(O)C(O)C1O	-2.63422	0	0.0885	-0.0885	TN	0.0603	YES
+	235	CCCNCC(O)COc1ccccc1C(=O)CCc1ccccc1	9.57874	1	0.5847	0.4153	TP	0.0282	YES
+	3768	Cc1cc(O)cc2c1C1(C)CCC3C(C)(C)CCCC3(C)C1C2	12.6034	0	0.7076	-0.7076	FP	0.0324	YES
*	239	OCCN1CCN(CCCN2c3ccccc3Sc3ccc(Cl)cc32)CC1	21.8414	1	1.0829	-0.0829	TP	0.0452	YES
+	2263	NC(=O)C1CCCc2c1[nH]c1ccc(Cl)cc21	1.97259	0	0.2757	-0.2757	TN	0.0306	YES
*	240	CN(C)CCCN1c2ccccc2Sc2ccccc21	17.5631	1	0.9091	0.0909	TP	0.0385	YES
#	1470	OCC1OC(Oc2ccc(O)cc2)C(O)C(O)C1O	-0.54695	0	0.1733	-0.1733	TN	0.027	YES
*	246	CCC(=O)c1ccc2c(c1)N(CCCN(C)C)c1ccccc1S2	11.7595	1	0.6733	0.3267	TP	0.038	YES
-	2395	CN(C)C(=O)c1ccc(S(=O)(=O)c2ccc(NC(=O)C(C)(O)C(F)(F)F)c(Cl)c2)cc1	8.87396	0	0.5561	-0.5561	FP	0.0766	YES
*	250	CNCCCC1c2ccccc2C=Cc2ccccc21	14.3022	1	0.7766	0.2234	TP	0.0278	YES
+	108	CN(C)CCOC(=O)COc1ccc(Cl)cc1	6.88732	0	0.4754	-0.4754	TN	0.0275	YES
*	252	CN1CCN(CCCN2c3ccccc3Sc3ccc(Cl)cc32)CC1	19.8853	1	1.0035	-0.0035	TP	0.0434	YES
#	768	CN1CCCC1c1cccnc1	2.34074	0	0.2906	-0.2906	TN	0.0179	YES
-	262	COC(=O)C1C2CC3c4[nH]c5cc(OC)ccc5c4CCN3CC2CC(OC(=O)c2cc(OC)c(OC)c(OC)c2)C1OC	14.318	1	0.7773	0.2227	TP	0.0951	YES
*	1831	O=C(O)CCCCC1SCC2NC(=O)NC21	-8.48197	0	-0.1491	0.1491	TN	0.0397	YES
-	263	O=C(c1ccc(OCCN2CCCCC2)cc1)c1c(-c2ccc(O)cc2)sc2cc(O)ccc12	14.1444	1	0.7702	0.2298	TP	1.0528	YES
+	656	CC12CCC3C(CCC4=CC(=O)CCC43C)C1CCC2=O	1.74916	0	0.2666	-0.2666	TN	2.0325	No
-	278	Oc1ccc(-c2nc(-c3ccncc3)c(-c3ccc(F)cc3)[nH]2)cc1	16.8287	1	0.8793	0.1207	TP	0.0392	YES
+	3558	COc1cc(-c2cn(C)c(=O)c3cnccc23)c(OC)cc1CN(C)C	8.38175	0	0.5361	-0.5361	FP	0.0441	YES
*	279	O=C(CCCN1CCC2(CC1)C(=O)NCN2c1ccccc1)c1ccc(F)cc1	9.02342	1	0.5622	0.4378	TP	0.0422	YES
#	2664	CC12CCC3C4CCC(=O)C=C4CCC3C1CCC2OC(=O)CCc1ccccc1	4.85759	0	0.3929	-0.3929	TN	0.0553	YES
#	288	CN1CCN(CCC=C2c3ccccc3Sc3ccc(S(=O)(=O)N(C)C)cc32)CC1	16.9251	1	0.8832	0.1168	TP	0.0645	YES
-	127	CNC(C)C(O)c1ccccc1	4.56399	0	0.381	-0.381	TN	0.0121	YES
#	291	OC(CCN1CCCCC1)(c1ccccc1)C1CCCCC1	14.9378	1	0.8024	0.1976	TP	0.0266	YES
#	1469	OCC(O)C(O)C(O)C(O)CO	-5.26159	0	-0.0182	0.0182	TN	0.0083	YES
#	294	CN(C)CCCN1c2ccccc2Sc2ccc(C(F)(F)F)cc21	20.0601	1	1.0106	-0.0106	TP	0.0476	YES
-	3200	Cn1nnc(-c2ccc(-c3ccc(N4CC(CO)OC4=O)cc3F)cn2)n1	3.89378	0	0.3537	-0.3537	TN	0.0596	YES
*	295	CC(CN(C)C)CN1c2ccccc2CCc2ccccc21	15.8835	1	0.8409	0.1591	TP	0.0342	YES
#	2809	CS(=O)(=O)c1ccc(-c2cnc(N)c(C(=O)Nc3ccccc3)n2)cc1	0.82799	0	0.2292	-0.2292	TN	0.0618	YES
+	297	Nc1nc(N)c2nc(-c3ccccc3)c(N)nc2n1	2.55858	1	0.2995	0.7005	FN	0.0444	YES
#	2493	O=C(NC1CCNCC1)c1[nH]ncc1NC(=O)c1c(Cl)cccc1Cl	5.76311	0	0.4297	-0.4297	TN	0.0461	YES
-	355	CCCCOc1cc(C(=O)NCCN(CC)CC)c2ccccc2n1	10.8047	1	0.6345	0.3655	TP	0.0321	YES
#	3445	CC(=O)C1(N)Cc2c(O)c3c(c(O)c2C(OC2CC(O)C(O)CO2)C1)C(=O)c1ccccc1C3=O	-4.803	0	0.0004	-0.0004	TN	0.0545	YES
+	372	CN(C(=O)CN(CCO)CC(=O)N(C)C(C)(C)Cc1ccccc1)C(C)(C)Cc1ccccc1	7.28863	1	0.4917	0.5083	FN	0.0382	YES
-	1501	O=C(Cn1ccnc1[N+](=O)[O-])NCc1ccccc1	4.34142	0	0.3719	-0.3719	TN	0.0323	YES
*	380	CN(C)CCCOc1nn(Cc2ccccc2)c2ccccc12	18.2532	1	0.9371	0.0629	TP	1.0296	YES
+	2498	COCC(=O)NCC=Cc1ccc2ncnc(Nc3ccc(Oc4ccc(C)nc4)c(C)c3)c2c1	6.41754	0	0.4563	-0.4563	TN	0.0668	YES
#	417	CN(C)CCC=C1c2ccccc2CSc2ccccc21	17.6569	1	0.9129	0.0871	TP	0.0398	YES
+	3697	Cc1ccc(Nc2cc(NC3CCCCC3N)nnc2C(N)=O)nc1C	7.51938	0	0.501	-0.501	FP	2.0534	No
*	427	CC(C)N=c1cc2n(-c3ccc(Cl)cc3)c3ccccc3nc-2cc1Nc1ccc(Cl)cc1	8.9848	1	0.5606	0.4394	TP	0.0743	YES
#	1979	Cc1ccc(Nc2c(F)cccc2Cl)c(CC(=O)O)c1	-1.95085	0	0.1163	-0.1163	TN	0.0359	YES
#	434	CCCCc1cc2ccccc2c(OCCN(C)C)n1	9.78224	1	0.593	0.407	TP	0.0248	YES
#	2362	Cc1ccc(Cl)c(OCC(O)CNC(C)(C)C)c1	3.72983	0	0.3471	-0.3471	TN	0.0274	YES
-	435	CCN(CC)CCNc1ccc(CO)c2sc3ccccc3c(=O)c12	10.4303	1	0.6193	0.3807	TP	1.0388	YES
#	3318	O=C(NN=Cc1ccc(O)c(O)c1)c1cc2ccccc2cc1O	0.24792	0	0.2056	-0.2056	TN	0.045	YES
*	438	CC(=O)c1ccc2c(c1)N(CCCN(C)C)c1ccccc1S2	11.2737	1	0.6536	0.3464	TP	0.0372	YES
*	3340	Cc1ccc(NC(=O)C(=O)NC2CC(C)(C)NC(C)(C)C2)cc1	4.79999	0	0.3906	-0.3906	TN	0.0356	YES
#	442	CC(=O)c1ccc2c(c1)N(CCCN1CCC(CCO)CC1)c1ccccc1S2	10.9378	1	0.6399	0.3601	TP	0.0488	YES
#	969	NC(=O)NC1NC(=O)NC1=O	-4.05195	0	0.0309	-0.0309	TN	0.0269	YES
#	452	CN1CCCC1CCOC(C)(c1ccccc1)c1ccc(Cl)cc1	13.1951	1	0.7316	0.2684	TP	0.04	YES
+	3851	COc1ccc(Cl)cc1-c1cc(=O)[nH]c(=S)n1CC(N)=O	-4.30992	0	0.0204	-0.0204	TN	1.0516	YES
#	508	CCN(CC)Cc1cc(Nc2ccnc3cc(Cl)ccc23)ccc1O	6.92255	1	0.4768	0.5232	FN	0.0465	YES
+	3553	O=C(NCc1ccco1)c1ccc2c(c1)N(Cc1c(F)cccc1Cl)C(=O)CS2	3.0673	0	0.3202	-0.3202	TN	3.0637	No
-	510	COc1cc(C=CC(=O)C=C(O)C=Cc2ccc(O)c(OC)c2)ccc1O	4.74778	1	0.3884	0.6116	FN	0.0476	YES
*	1111	NCC(O)c1ccc(O)c(O)c1	-3.25986	0	0.0631	-0.0631	TN	0.0121	YES
#	532	COc1cc2c3cc1Oc1c(OC)c(OC)cc4c1C(Cc1ccc(O)c(c1)Oc1ccc(cc1)CC3N(C)CC2)N(C)CC4	12.4355	1	0.7008	0.2992	TP	0.0727	YES
-	2994	CN1CCN(c2ncc(-c3cc(Cl)cc(Cl)c3Cl)c(N)n2)CC1	1.90009	0	0.2727	-0.2727	TN	3.061	No
#	533	COc1ccc2cc1Oc1ccc(cc1)CC1c3cc(c(OC)cc3CCN1C)Oc1c(OC)c(OC)cc3c1C(C2)N(C)CC3	15.2631	1	0.8157	0.1843	TP	0.0692	YES
-	562	CCOC(=O)C1=CC2(CC)CCCN3CCc4c(n1c1ccccc41)C32	5.17215	0	0.4057	-0.4057	TN	1.0602	YES
#	538	Fc1ccc(C(c2ccc(F)cc2)N2CCN(CC=Cc3ccccc3)CC2)cc1	13.9188	1	0.761	0.239	TP	0.0488	YES
-	650	CC12CCC3c4ccc(O)cc4CCC3C1CCC2=O	0.89226	0	0.2318	-0.2318	TN	0.0346	YES
#	550	COc1cc2nc(N3CCN(C(=O)C4COc5ccccc5O4)CC3)nc(N)c2cc1OC	2.86519	1	0.312	0.688	FN	0.0825	YES
*	1606	COc1ccc(C2(C#N)CCC(C(=O)O)CC2)cc1OC1CCCC1	1.47668	0	0.2555	-0.2555	TN	0.0554	YES
*	582	C1CCC(C(CC2CCCCN2)C2CCCCC2)CC1	9.24999	1	0.5714	0.4286	TP	0.0265	YES
*	2542	CC(C)(C)c1cnc(CSc2cnc(NC(=O)C3CCNCC3)s2)o1	-0.40874	0	0.1789	-0.1789	TN	4.0557	No
+	584	CN1CCCN(C(c2ccccc2)c2ccc(Cl)cc2)CC1	12.2618	1	0.6937	0.3063	TP	0.0358	YES
#	2471	CCCCCCOC(=O)N=C(N)c1ccc(NCc2nc3cc(C(=O)N(CCC(=O)OCC)c4ccccn4)ccc3n2C)cc1	-10.3024	0	-0.223	0.223	TN	0.0912	YES
-	592	CCN(CCCc1ccccc1)CCCc1ccccc1	13.8693	1	0.759	0.241	TP	0.0239	YES
+	3667	C=CC(=O)Nc1cccc(Oc2nc(Nc3ccc(N4CCN(C)CC4)cc3)nc3ccsc23)c1	-5.60941	0	-0.0324	0.0324	TN	1.0681	YES
+	596	CN1CCN(C2=Nc3ccccc3Oc3ccc(Cl)cc32)CC1	16.6363	1	0.8715	0.1285	TP	2.0471	No
+	2579	Nc1ccc(C(=O)c2cc3c(ccc4ccccc43)[nH]2)cc1	10.9517	0	0.6405	-0.6405	FP	2.0337	No
+	597	O=C(c1ccc(F)cc1)C1CCN(CCn2c(=O)[nH]c3ccccc3c2=O)CC1	9.6467	1	0.5875	0.4125	TP	2.0339	No
+	1632	CC12C=CCC1C1CCC3CC(=O)CCC3(C)C1CC2	-2.06358	0	0.1117	-0.1117	TN	0.0317	YES
-	605	CCCCCC(=O)OC1(C(C)=O)CCC2C3CCC4=CC(=O)CCC4(C)C3CCC21C	1.45191	1	0.2545	0.7455	FN	0.0477	YES
*	2310	Cc1ccc(S(=O)(=O)O)cc1	2.187	0	0.2844	-0.2844	TN	0.0337	YES
-	681	C=C1C(=O)OC2C1CCC(C)=CCCC1(C)OC21	6.67193	1	0.4666	0.5334	FN	0.0301	YES
+	1822	CN(CCCCCCCCCCN(C)C(=O)Oc1cccc([N+](C)(C)C)c1)C(=O)Oc1cccc([N+](C)(C)C)c1	8.23469	0	0.5301	-0.5301	FP	0.0443	YES
-	687	CNCCCCOc1ccccc1Cc1ccccc1	13.4561	1	0.7422	0.2578	TP	0.0209	YES
*	3862	Cc1nn(C)c2c1C(c1ccccc1F)=NCC(=O)N2C	-1.08529	0	0.1514	-0.1514	TN	1.0406	YES
*	693	CCC(=C(c1ccccc1)c1ccc(OCCN(C)C)cc1)c1ccccc1	15.5923	1	0.829	0.171	TP	0.0336	YES
-	2867	COc1ccc(-n2nc(C(N)=O)c3c2C(=O)N(c2ccc(N4CCCCC4=O)cc2)CC3)cc1	1.21078	0	0.2447	-0.2447	TN	1.0557	YES
-	695	Clc1ccc2c(c1)N=C(N1CCNCC1)c1ccccc1N2	10.6745	1	0.6292	0.3708	TP	2.0467	No
+	2151	CC(=O)C1(O)CCC2C3CCC4=CC(=O)CCC4(C)C3(F)C(O)CC21C	-3.45885	0	0.055	-0.055	TN	1.0381	YES
-	776	CCC(=C(CC)c1ccc(O)cc1)c1ccc(O)cc1	4.11014	1	0.3625	0.6375	FN	0.0233	YES
#	1611	CCOC(=O)c1ccc(C#Cc2ccc3c(c2)C(C)(C)CCS3)nc1	9.20713	0	0.5696	-0.5696	FP	0.0495	YES
#	778	CCC1OC(=O)C(C)C(OC2CC(C)(OC)C(O)C(C)O2)C(C)C(OC2OC(C)CC(N(C)C)C2O)C(C)(O)CC(C)CN(C)C(C)C(O)C1(C)O	17.3741	1	0.9014	0.0986	TP	0.0835	YES
*	324	NNC(=O)c1ccncc1	-0.99367	0	0.1552	-0.1552	TN	0.0132	YES
-	784	CC(=O)Oc1ccccc1C(=O)Nc1ncc([N+](=O)[O-])s1	6.02417	1	0.4403	0.5597	FN	0.0334	YES
-	1943	CC(C)=CCCC(C)=CCCC(C)=CCC/C(C)=C/CC1=C(C)C(=O)c2ccccc2C1=O	3.80973	0	0.3503	-0.3503	TN	0.0487	YES
#	785	Cc1c(O)cccc1C(=O)NC(CSc1ccccc1)C(O)CN1CC2CCCCC2CC1C(=O)NC(C)(C)C	15.4848	1	0.8247	0.1753	TP	0.0712	YES
*	2676	CCCCCCCCC=CCCCCCCCC(=O)NCCOC(=O)CC(C(=O)O)S(=O)(=O)O	-3.64524	0	0.0474	-0.0474	TN	1.0575	YES
+	836	C=CC1CN2CCC1CC2C(O)c1ccnc2ccc(OC)cc12	7.62345	1	0.5053	0.4947	TP	0.0391	YES
*	2426	CCCCCCCCC=CC(=O)O	-0.59788	0	0.1713	-0.1713	TN	0.0158	YES
*	858	Cc1ccc(-c2cc(C(F)(F)F)nn2-c2ccc(S(N)(=O)=O)cc2)cc1	19.6795	1	0.9951	0.0049	TP	2.0572	No
-	3168	C=CC1CC1(NC(=O)C1CC(Oc2ncc(OC)c3ccc(Cl)cc23)CN1C(=O)C(NC(=O)OC(C)(C)C)C(C)(C)C)C(=O)NS(=O)(=O)C1CC1	4.98677	0	0.3981	-0.3981	TN	0.1068	YES
*	966	CCCCC(CC)CN1CN(CC(CC)CCCC)CC(C)(N)C1	9.97662	1	0.6009	0.3991	TP	0.0259	YES
-	272	OCc1cc(C(O)CNCCCCCCOCCCCc2ccccc2)ccc1O	14.5616	0	0.7872	-0.7872	FP	0.0411	YES
*	994	N#Cc1ccc2c(c1)N(CCCN1CCC(O)CC1)c1ccccc1S2	10.12	1	0.6067	0.3933	TP	0.0564	YES
-	3075	O=C(O)CC(C(=O)O)N1C(=O)C(=C2C(=O)Nc3ccc(Br)cc32)SC1=S	3.0089	0	0.3178	-0.3178	TN	0.0805	YES
-	1037	C=C1CCC2C(C)(CO)C(O)CCC2(C)C1CC=C1C(=O)OCC1O	10.916	1	0.639	0.361	TP	0.0459	YES
-	2383	CNC(=O)c1c(I)c(NC(=O)CCCCC(=O)Nc2c(I)c(C(=O)O)c(I)c(C(=O)NC)c2I)c(I)c(C(=O)O)c1I	-0.54989	0	0.1732	-0.1732	TN	0.09	YES
-	1052	O=C(NC(=O)c1c(F)cccc1F)Nc1cc(Cl)c(OC(F)(F)C(F)C(F)(F)F)cc1Cl	7.06309	1	0.4825	0.5175	FN	0.0642	YES
-	3191	C[N+]1(CC2CC2)CCC23c4c5ccc(O)c4OC2C(=O)CCC3(O)C1C5	-1.96865	0	0.1156	-0.1156	TN	0.0627	YES
+	1075	Clc1ccc2c(c1)CCc1cccnc1C2=C1CCNCC1	12.7807	1	0.7148	0.2852	TP	2.0376	No
#	3461	COc1ccc(C(=O)C2CCN(CC(=O)N(Cc3nc(=O)c4c([nH]3)CCOC4)CC3CC3)CC2)cc1	-0.63163	0	0.1699	-0.1699	TN	0.0696	YES
#	1080	O=C1Nc2ccc(Cl)cc2C(C#CC2CC2)(C(F)(F)F)O1	18.024	1	0.9278	0.0722	TP	0.0694	YES
*	995	OC(Cn1cncn1)(Cn1cncn1)c1ccc(F)cc1F	4.60431	0	0.3826	-0.3826	TN	0.0508	YES
*	1133	Cc1ccc(NC(=O)c2ccc(CN3CCN(C)CC3)cc2)cc1Nc1nccc(-c2cccnc2)n1	19.7833	1	0.9993	0.0007	TP	0.0666	YES
#	1838	CCN1CCN(C(=O)NC(C(=O)NC2C(=O)N3C(C(=O)O)=C(CSc4nnnn4C)CSC23)c2ccc(O)cc2)C(=O)C1=O	-4.75096	0	0.0025	-0.0025	TN	0.1232	YES
#	1144	CC(C)=CCOc1ccc(C=CC(=O)c2ccc(OCC=C(C)C)cc2OCC(=O)O)cc1	9.60726	1	0.5859	0.4141	TP	0.0501	YES
#	199	COc1ccc2[nH]cc(CCNC(C)=O)c2c1	2.36381	0	0.2916	-0.2916	TN	0.0204	YES
#	1158	O=C1CCc2ccc(OCCCCN3CCN(c4cccc(Cl)c4Cl)CC3)cc2N1	12.6175	1	0.7082	0.2918	TP	0.0677	YES
+	2371	CC(C)Cc1ccc(C(C)C(=O)OCc2ccccn2)cc1	5.70363	0	0.4273	-0.4273	TN	0.0331	YES
+	1163	Cc1ccc(O)c(C(CCN(C(C)C)C(C)C)c2ccccc2)c1	13.606	1	0.7483	0.2517	TP	0.0227	YES
+	234	O=C(C1CCCCC1)N1CC(=O)N2CCc3ccccc3C2C1	3.63699	0	0.3433	-0.3433	TN	0.0379	YES
*	1167	CC1(CN2CCC(n3c(=O)[nH]c4ccccc43)CC2)OCc2ccccc2-n2cccc21	16.5312	1	0.8672	0.1328	TP	3.0559	No
+	2080	O=[N+]([O-])c1nccn1COC(CO)C(O)CO	9.40722	0	0.5777	-0.5777	FP	0.0244	YES
-	1169	O=C(C=Cc1ccccc1)NC(NC(=S)Nc1cccc2cccnc12)C(Cl)(Cl)Cl	13.3521	1	0.738	0.262	TP	0.0693	YES
+	3165	CCOCOCC(CC(C)C(=O)NO)NC(=O)c1ccc(Oc2ccccc2)cc1	3.87038	0	0.3528	-0.3528	TN	3.0352	No
#	1172	COc1cc2c(Nc3ccc(NC(=O)c4ccccc4)cc3)ncnc2cc1OCCCN1CCOCC1	15.0158	1	0.8056	0.1944	TP	0.073	YES
+	2429	CC1COC2(c3ccccc3Cl)c3cc(Cl)ccc3NC(=O)CN12	4.33954	0	0.3719	-0.3719	TN	4.0454	No
+	1239	O=[N+]([O-])c1ccc(O)c2ncccc12	7.19348	1	0.4878	0.5122	FN	0.0195	YES
*	1780	CN(C)C1C(=O)C(C(=O)NCNC(CCCCN)C(=O)O)C(=O)C2(O)C(O)=C3C(=O)c4c(O)cccc4C(C)(O)C3CC12	1.94495	0	0.2746	-0.2746	TN	0.0796	YES
#	1254	COc1ccc2cc1Oc1ccc(cc1)CC1c3c(cc4c(c3Oc3cc5c(cc3OC)CCN(C)C5C2)OCO4)CCN1C	22.3437	1	1.1033	-0.1033	TP	0.1	YES
-	3643	CC(C)NC(=O)N1CCC(NC2=Nc3cc(F)ccc3N(CC(F)F)c3ccc(Cl)cc32)C1	10.263	0	0.6125	-0.6125	FP	2.0559	No
+	1260	CCCCC(C=O)NC(=O)C(CC(C)C)NC(=O)C(CC(C)C)NC(C)=O	1.1993	1	0.2443	0.7557	FN	0.0278	YES
*	1940	COC(C(=O)C(O)C(C)O)C1Cc2cc3cc(OC4CC(OC5CC(O)C(O)C(C)O5)C(O)C(C)O4)c(C)c(O)c3c(O)c2C(=O)C1OC1CC(OC2CC(OC3CC(C)(O)C(O)C(C)O3)C(O)C(C)O2)C(O)C(C)O1	-18.6285	0	-0.5613	0.5613	TN	1.1171	No
#	1264	O=S(=O)(NCCNCC=Cc1ccc(Br)cc1)c1cccc2cnccc12	22.0829	1	1.0927	-0.0927	TP	0.0751	YES
*	2915	CC#CCn1c(N2CCCC(N)C2)nc2c1c(=O)n(Cc1nc(C)c3ccccc3n1)c(=O)n2C	0.47711	0	0.2149	-0.2149	TN	0.0894	YES
#	1272	COCCOC(=O)C1=C(C)NC(C)=C(C(=O)OCC=Cc2ccccc2)C1c1cccc([N+](=O)[O-])c1	15.9709	1	0.8444	0.1556	TP	0.0581	YES
-	3849	N#CCC1(n2cc(-c3ncnc4[nH]ccc34)cn2)CN(C2CCN(C(=O)c3ccnc(C(F)(F)F)c3F)CC2)C1	4.09832	0	0.3621	-0.3621	TN	0.0935	YES
-	1277	CC(C)c1ccc2c(c1)c(SC(C)(C)C)c(CC(C)(C)C(=O)O)n2Cc1ccc(Cl)cc1	9.12182	1	0.5662	0.4338	TP	0.0598	YES
*	323	CC(C)(C(=O)c1cccnc1)c1cccnc1	2.07561	0	0.2799	-0.2799	TN	0.0235	YES
*	1290	CN1CCCCC1CCN1c2ccccc2Sc2ccc(S(C)=O)cc21	16.6584	1	0.8724	0.1276	TP	0.0609	YES
#	864	O=C1CN(N=Cc2ccc([N+](=O)[O-])o2)C(=O)N1	-4.80573	0	0.0003	-0.0003	TN	0.0491	YES
+	1292	CN1CCC(=C2c3ccccc3CCc3sccc32)CC1	10.0864	1	0.6053	0.3947	TP	4.0325	No
+	2563	CC1(C)CNc2cc(NC(=O)c3cccnc3NCc3ccncc3)ccc21	9.51144	0	0.582	-0.582	FP	0.0422	YES
-	1299	CCCCC(C=O)NC(=O)C(CC(C)C)NC(=O)OCc1ccccc1	-0.11919	1	0.1907	0.8093	FN	0.0322	YES
-	3474	Cc1nnc(CC2C=C(c3ccc(Cl)cc3)c3ccccc3-n3c(C)nnc32)o1	2.85128	0	0.3114	-0.3114	TN	5.0562	No
+	1306	COc1ccc2c(c1)c(C1=C(c3c[nH]c4ccccc34)C(=O)NC1=O)cn2CCCN(C)C	3.26806	1	0.3283	0.6717	FN	0.0601	YES
-	1528	CC1CNc2c(cccc2S(=O)(=O)NC(CCCNC(=N)N)C(=O)N2CCC(C)CC2C(=O)O)C1	3.01745	0	0.3181	-0.3181	TN	0.0858	YES
-	1332	CC(C)(C)CC(C)(C)c1ccc(O)cc1	4.45174	1	0.3764	0.6236	FN	0.0149	YES
+	3431	CC(C)C(NC(=O)c1ccc2ccccc2n1)C(=O)NC(CC(=O)O)C(=O)COc1c(F)cccc1F	2.34519	0	0.2908	-0.2908	TN	0.0558	YES
*	1349	O[n+]1ccccc1SSc1cccc[n+]1O	1.79019	1	0.2683	0.7317	FN	2.0268	No
+	1040	COc1ccc2ccc(=O)oc2c1CC=C(C)C	1.79354	0	0.2684	-0.2684	TN	0.026	YES
-	1360	COc1ccc(CN2CCN(C(c3ccc(F)cc3)c3ccc(F)cc3)CC2)c(OC)c1OC	16.481	1	0.8651	0.1349	TP	0.0505	YES
*	1795	O=C(NCC(O)CO)c1c(I)c(C(=O)NCC(O)CO)c(I)c(N(CCO)C(=O)CO)c1I	-3.81066	0	0.0407	-0.0407	TN	0.0543	YES
-	1372	CNCCC(Oc1cccc2ccccc12)c1cccs1	7.59964	1	0.5043	0.4957	TP	1.0279	YES
+	2772	CCOC(=O)CNC(C(=O)N1CCC1C(=O)N(C)c1ccc(C(=N)NO)cc1)C1CCCCC1	1.58274	0	0.2598	-0.2598	TN	3.058	No
-	1381	Cc1cccc(C)c1OCC(=O)NC(Cc1ccccc1)C(O)CC(Cc1ccccc1)NC(=O)C(C(C)C)N1CCCNC1=O	13.2916	1	0.7356	0.2644	TP	0.0615	YES
#	2193	Cc1nc2n(c(=O)c1CCN1CCC(c3noc4cc(F)ccc34)CC1)CCCC2O	-4.7864	0	0.0011	-0.0011	TN	0.066	YES
+	1421	CCOC(=O)C(CCc1ccccc1)NC1CCc2ccccc2N(CC(=O)O)C1=O	8.37729	1	0.5359	0.4641	TP	0.0464	YES
*	1522	C=CCC1(O)CCC2C3CCC4=CC(=O)CCC4=C3C=CC21C	0.57075	0	0.2187	-0.2187	TN	0.0461	YES
#	1425	NC(=O)c1ccc2nc(-c3ccc(Oc4ccc(Cl)cc4)cc3)[nH]c2c1	4.30424	1	0.3704	0.6296	FN	0.0528	YES
*	3276	O=C(NCC(=O)N1CCCC1)Nc1ccc2cnccc2c1	-1.82989	0	0.1212	-0.1212	TN	0.0332	YES
#	1442	COc1cccc2c1CCCC2CCCN1CCN(C2CCCCC2)CC1	12.5217	1	0.7043	0.2957	TP	0.0395	YES
#	2520	CCc1cncnc1N1CCN(Cc2nc3ccc(C(F)(F)F)cc3[nH]2)CC1	1.71892	0	0.2654	-0.2654	TN	0.0475	YES
+	1445	Fc1ccc(Cl)cc1-c1nc(Nc2ccncc2)c2nccnc2n1	10.7929	1	0.634	0.366	TP	0.0641	YES
-	796	O=C(Oc1ccccc1)c1ccccc1O	1.67095	0	0.2634	-0.2634	TN	0.0255	YES
+	1446	Cc1[nH]c(C=C2C(=O)Nc3ccc(S(=O)(=O)N(C)c4cccc(Cl)c4)cc32)c(C)c1C(=O)N1CCN(C)CC1	16.7031	1	0.8742	0.1258	TP	0.0967	YES
*	1356	CCCCCCCCCCCC(=O)OCC(O)CO	0.73051	0	0.2252	-0.2252	TN	0.0184	YES
#	1452	CCOC(=O)C1C(=COCCN)NC(C)=C(C(=O)OC)C1c1ccccc1Cl	12.8543	1	0.7178	0.2822	TP	0.0444	YES
#	1565	C#CC1(O)CCC2C3CCC4=CC(=O)CCC4=C3C=CC21CC	1.57977	0	0.2597	-0.2597	TN	0.0582	YES
+	1502	O=[N+]([O-])c1cc(I)c(O)c(I)c1	6.7897	1	0.4714	0.5286	FN	0.0267	YES
*	3921	CCCCCCCCCCCCOC(=O)CS(=O)(=O)O	4.98866	0	0.3982	-0.3982	TN	0.0404	YES
+	1531	CCOC(=O)C1OC1C(=O)NC(CC(C)C)C(=O)NCCC(C)C	7.33174	1	0.4934	0.5066	FN	0.0317	YES
+	1608	Oc1ccc(C(O)CNCCCCCCNCC(O)c2ccc(O)c(O)c2)cc1O	3.45332	0	0.3358	-0.3358	TN	0.0393	YES
-	1558	C#CC1(O)CCC2C3CCC4=CCCCC4C3C(=C)CC21CC	7.90796	1	0.5168	0.4832	TP	0.0531	YES
*	1344	CC12CCC3C(CCC4=C(O)C(=O)CCC43C)C1CCC2=O	0.5415	0	0.2175	-0.2175	TN	2.0325	No
-	1570	C=C1C(=CC=C2CCCC3(C)C2CCC3C(C)C=CC(O)C2CC2)CC(O)CC1O	13.5643	1	0.7466	0.2534	TP	0.0567	YES
+	808	CCCCCCCCCCCC[N+](C)(C)CCOc1ccccc1	10.8432	0	0.6361	-0.6361	FP	0.022	YES
-	1585	CNC(=O)c1cc(Oc2ccc(NC(=O)Nc3ccc(Cl)c(C(F)(F)F)c3)cc2)ccn1	7.60656	1	0.5046	0.4954	TP	0.0581	YES
-	1084	CN(CC=CC#CC(C)(C)C)Cc1cccc2ccccc12	16.8491	0	0.8801	-0.8801	FP	0.0432	YES
#	1586	COc1cccc(CCc2ccccc2OCC(CN(C)C)OC(=O)CCC(=O)O)c1	8.92938	1	0.5583	0.4417	TP	0.0409	YES
#	2955	Cc1nc(NC(=O)N2CCCC2C(N)=O)sc1-c1ccnc(C(C)(C)C(F)(F)F)c1	-4.68231	0	0.0053	-0.0053	TN	0.0633	YES
#	1589	COC(=O)C1=C(C)NC(C)=C(C(=O)OC(C)(C)CN(C)CCC(c2ccccc2)c2ccccc2)C1c1cccc([N+](=O)[O-])c1	21.1291	1	1.054	-0.054	TP	0.0627	YES
*	80	O=NN(CCCl)C(=O)NCCCl	-9.58595	0	-0.1939	0.1939	TN	4.0175	No
*	1590	COC(=O)C1=C(C)NC(C)=C(C(=O)OCCN2CCN(C(c3ccccc3)c3ccccc3)CC2)C1c1cccc([N+](=O)[O-])c1	20.6238	1	1.0335	-0.0335	TP	0.0659	YES
#	1918	CCCCCC(O)C1C(=O)OC(C)C(O)C=CC=CC=CC=CC=C(C)C(O)C(O)C(O)CC(O)CC(O)CC(O)CC(O)CC1O	-8.32079	0	-0.1425	0.1425	TN	0.055	YES
*	1598	CS(=O)(=O)CCNCc1ccc(-c2ccc3ncnc(Nc4ccc(OCc5cccc(F)c5)c(Cl)c4)c3c2)o1	11.2966	1	0.6545	0.3455	TP	2.1121	No
+	2481	CCOC(=O)c1cc(=O)c2c(OCC(COc3cccc4oc(C(=O)OCC)cc(=O)c34)OC(=O)C(N)CCCCN)cccc2o1	0.91147	0	0.2326	-0.2326	TN	6.0739	No
-	1638	CCN(CC)CCCN(c1ccccc1)C1Cc2ccccc2C1	16.0346	1	0.847	0.153	TP	0.0226	YES
-	3781	N#Cc1c(N)nc(N)nc1NC(c1nc2c(F)ccc(Cl)c2c(=O)n1-c1cccnc1)C1CC1	5.03085	0	0.3999	-0.3999	TN	1.0899	YES
*	1642	CC(C)c1onc(-c2c(Cl)cccc2Cl)c1COc1ccc(C=Cc2cccc(C(=O)O)c2)c(Cl)c1	8.1763	1	0.5277	0.4723	TP	0.0846	YES
*	824	OC(CBr)C(O)C(O)C(O)CBr	-2.54709	0	0.0921	-0.0921	TN	0.0186	YES
-	1646	COc1cc(C(C)C)c2c(c1)S(=O)(=O)N(COc1cc(=O)n3cccc(OCCN4CCCCC4)c3n1)C2=O	12.2836	1	0.6946	0.3054	TP	0.0801	YES
+	3568	O=C(CCCCCCNC(=O)c1cnc(N(c2ccccc2)c2ccccc2Cl)nc1)NO	3.97213	0	0.3569	-0.3569	TN	2.0569	No
*	1647	O=C(c1ccc(Nc2nccc(-c3cc4ccccc4s3)n2)cc1)N1CCC(N2CCCC2)CC1	12.0334	1	0.6844	0.3156	TP	2.066	No
#	507	CC[N+](CC)(CC(=O)Nc1c(C)cccc1C)Cc1ccccc1	1.87836	0	0.2719	-0.2719	TN	0.0248	YES
*	1682	N#CC(c1ccc(Cl)cc1)c1c(Cl)cc(-n2ncc(=O)[nH]c2=O)cc1Cl	12.2856	1	0.6947	0.3053	TP	2.0678	No
#	3090	CN1CC(C(=O)NC2(C)OC3(O)C4CCCN4C(=O)C(Cc4ccccc4)N3C2=O)C=C2c3cccc4[nH]cc(c34)CC21	-0.24801	0	0.1855	-0.1855	TN	0.0948	YES
-	1691	CN1CCCC(n2nc(Cc3ccc(Cl)cc3)c3ccccc3c2=O)CC1	4.95355	1	0.3968	0.6032	FN	1.0408	YES
+	1476	O=c1c(-c2ccccc2)c1-c1ccccc1	11.311	0	0.6551	-0.6551	FP	0.0338	YES
*	1699	Clc1ccc(C(OCCN2CCCCC2)c2ccccc2)cc1	12.2645	1	0.6938	0.3062	TP	2.034	No
+	2355	CC(Cc1ccccc1)NCCCCl	5.0665	0	0.4014	-0.4014	TN	2.0136	No
+	1704	CCN(CC)CCOC(=O)C(Cc1cccc2ccccc12)CC1CCCO1	7.49141	1	0.4999	0.5001	FN	0.0315	YES
#	2115	NCCCC(N)C(=O)O	-4.47161	0	0.0139	-0.0139	TN	0.0102	YES
-	1726	CN(Cc1cc(Br)cc(Br)c1N)C1CCCCC1	17.889	1	0.9223	0.0777	TP	0.0679	YES
#	3705	CC#Cc1cncc(-c2ccc3c(c2)C2(N=C(C)C(N)=N2)C2(CCC(OC)CC2)C3)c1	9.03719	0	0.5627	-0.5627	FP	0.0755	YES
*	1738	CC(CN(C)C)CN1c2ccccc2Sc2ccccc21	18.3727	1	0.942	0.058	TP	0.041	YES
+	2399	CCCS(=O)(=O)Nc1ccc(F)c(C(=O)c2c[nH]c3ncc(-c4ccc(Cl)cc4)cc23)c1F	5.38135	0	0.4142	-0.4142	TN	1.0876	YES
#	1754	CCN(CC)C(C)CN1c2ccccc2Sc2ccccc21	18.7003	1	0.9553	0.0447	TP	0.0402	YES
+	3805	CCCCCCCOc1ccc(CCC(N)(CO)CO)cc1C(F)(F)F	11.6253	0	0.6679	-0.6679	FP	0.0366	YES
*	1798	COc1ccc2c(c1)N(CC(C)CN(C)C)c1ccccc1S2	17.2353	1	0.8958	0.1042	TP	0.037	YES
+	1262	O=C(O)Cc1cccc(OCCCN(Cc2cccc(C(F)(F)F)c2Cl)CC(c2ccccc2)c2ccccc2)c1	11.7117	0	0.6714	-0.6714	FP	0.0632	YES
-	1800	CN1CCN(C(c2ccccc2)c2ccc(Cl)cc2)CC1	11.776	1	0.674	0.326	TP	0.0349	YES
+	425	O=C(CCCN1CCN(c2ccccn2)CC1)c1ccc(F)cc1	7.36657	0	0.4948	-0.4948	TN	0.0377	YES
+	1830	CC1CC2C3CCC4=CC(=O)C=CC4(C)C3(Cl)C(O)CC2(C)C1(OC(=O)c1ccco1)C(=O)CCl	3.54114	1	0.3394	0.6606	FN	5.0682	No
+	2737	CCOC(=O)CCNc1cc(N2CCc3ccccc3CC2)nc(-c2ccccn2)n1	6.69458	0	0.4675	-0.4675	TN	0.0629	YES
#	1846	CN1CCN(CCCN2c3ccccc3Sc3ccc(S(=O)(=O)N(C)C)cc32)CC1	20.8865	1	1.0441	-0.0441	TP	0.0634	YES
#	1320	COC1C(OC(=O)C=CC=CC=CC=CC(=O)O)CCC2(CO2)C1C1(C)OC1CC=C(C)C	6.44376	0	0.4573	-0.4573	TN	0.0639	YES
#	1854	C#CC1(O)CCC2C3CCC4=Cc5oncc5CC4(C)C3CCC21C	16.1594	1	0.8521	0.1479	TP	0.0744	YES
+	3899	O=C(O)CC1CCc2c1[nH]c1ccc(OCc3ccc(C4CCCC4)c(C(F)(F)F)c3)cc21	4.47629	0	0.3774	-0.3774	TN	0.0518	YES
-	1857	C#CC1(O)CCC2C3CCC4=CCCCC4C3CCC21C	7.01955	1	0.4807	0.5193	FN	0.0501	YES
-	2267	CC(C)(C)c1cc(C(C)(C)C)c(NC(=O)c2c[nH]c3ccccc3c2=O)cc1O	3.48382	0	0.3371	-0.3371	TN	1.0387	YES
-	1864	CCC1CN2CCC1CC2C(O)c1ccnc2ccc(OC)cc12	6.86868	1	0.4746	0.5254	FN	0.0361	YES
+	1171	OCc1ccc(-c2ccc(-c3ccc(CO)s3)o2)s1	13.0693	0	0.7265	-0.7265	FP	5.0314	No
+	1898	CN(C)CCC=C1c2ccccc2C(C)(C)c2ccccc21	17.0071	1	0.8865	0.1135	TP	0.0313	YES
-	3249	CC1CCNC(=O)c2cc3ccc(C(=O)Nc4nc5ccccc5n4CCCN(C)C)cc3n21	5.2895	0	0.4104	-0.4104	TN	0.0689	YES
+	1904	Cc1cc(O)c2c(c1)OC1(C)CCC3C(C)(C)CCCC34COC2C14	19.8069	1	1.0003	-0.0003	TP	4.035	No
*	1385	CC1(C)SC2C(N=CN3CCCCCC3)C(=O)N2C1C(=O)O	-5.84694	0	-0.042	0.042	TN	0.0555	YES
*	1907	CCCOC(C(=O)OC1CCN(C)CC1)(c1ccccc1)c1ccccc1	13.6247	1	0.7491	0.2509	TP	0.0343	YES
#	3044	N=C1SC(=Cc2ccc(-c3ccc4c(c3)C(=O)NC4=O)o2)C(=O)N1c1ccc(Br)cc1	4.24081	0	0.3678	-0.3678	TN	0.1147	YES
#	1930	CC(CN(C)C)CN1c2ccccc2Sc2ccc(C(F)(F)F)cc21	20.8697	1	1.0435	-0.0435	TP	0.05	YES
#	2437	CCn1c(=O)c2c(nc(C=Cc3ccc(OC)c(OC)c3)n2C)n(CC)c1=O	1.36375	0	0.251	-0.251	TN	0.0601	YES
*	1983	CC(C(O)c1ccccc1)N(C)CCOC(c1ccccc1)c1ccccc1	14.2876	1	0.776	0.224	TP	0.0324	YES
*	3796	CCNCCS(=O)(=O)NCC1(c2ccccc2)SC(NC(=O)C(C)(C)C)=NN1C(=O)C(C)(C)C	8.44958	0	0.5388	-0.5388	FP	0.0745	YES
*	2007	Cc1c(-c2ccc(O)cc2)n(Cc2ccc(OCCN3CCCCCC3)cc2)c2ccc(O)cc12	16.9948	1	0.886	0.114	TP	0.053	YES
*	1408	CC1CCc2c(N3CCC(O)CC3)c(F)cc3c(=O)c(C(=O)O)cn1c23	-9.50566	0	-0.1907	0.1907	TN	0.0494	YES
#	2022	CN(C)CCOC1=Cc2ccccc2Sc2ccc(Cl)cc21	19.9061	1	1.0043	-0.0043	TP	0.0516	YES
+	823	Clc1ccc(C(c2ccc(Cl)cc2)C(Cl)(Cl)Cl)cc1	-0.39899	0	0.1793	-0.1793	TN	2.0467	No
-	2024	Cn1nnnc1Sc1ncnc2scc(-c3cccc(S(C)(=O)=O)c3)c12	11.7955	1	0.6748	0.3252	TP	2.0798	No
-	1614	COc1ccc(C(=O)NCc2ccc(OCCN(C)C)cc2)cc1OC	8.59387	0	0.5447	-0.5447	FP	0.0379	YES
+	2041	CC1CC2C3CCC4=CC(=O)C=CC4(C)C3C(=O)CC2(C)C1(O)C(=O)CO	3.16748	1	0.3242	0.6758	FN	0.0446	YES
-	805	O=C(O)Cc1cccc2ccccc12	1.92159	0	0.2736	-0.2736	TN	0.0146	YES
+	2074	O=C(CCC1CCN(Cc2ccccc2)CC1)c1ccc2c(c1)NCCCC2	11.471	1	0.6616	0.3384	TP	0.0312	YES
#	2808	CCOC(=O)C=CC(CC1CCNC1=O)NC(=O)C(CC(=O)C(NC(=O)c1cc(C)on1)C(C)C)Cc1ccc(F)cc1	-3.82402	0	0.0402	-0.0402	TN	0.0598	YES
*	2086	CCCN(CCC)C(=O)C(CCC(=O)OCCCN1CCN(CCOC(=O)Cc2c(C)n(C(=O)c3ccc(Cl)cc3)c3ccc(OC)cc23)CC1)NC(=O)c1ccccc1	11.7424	1	0.6726	0.3274	TP	0.0952	YES
-	859	CC(C)(C)NC(=O)C1CC2CCCCC2CN1CC(O)C(Cc1ccccc1)NC(=O)C(CC(N)=O)NC(=O)c1ccc2ccccc2n1	9.60818	0	0.5859	-0.5859	FP	0.0749	YES
-	2124	COc1cc(O)c2c(c1)C1OC1CC(O)C(O)C(=O)C=CCC(C)OC2=O	7.49685	1	0.5001	0.4999	TP	0.0401	YES
-	271	NCCCCNCCCN	4.84961	0	0.3926	-0.3926	TN	0.007	YES
#	2127	CN(C)CCCNC(=O)c1ccc(-c2cc(O)c3ncccc3c2)cc1	13.0578	1	0.7261	0.2739	TP	0.0335	YES
#	3014	N#CC(c1ccnc(NCCc2cccnc2)n1)c1nc2ccccc2s1	7.35833	0	0.4945	-0.4945	TN	0.0644	YES
-	2129	COC(=O)C1=C(C)NC(COC(N)=O)=C(C(=O)OC(C)C)C1c1cccc(Cl)c1Cl	10.7967	1	0.6342	0.3658	TP	0.0546	YES
*	1868	CCC(C(=O)NC(N)=O)c1ccccc1	0.23311	0	0.205	-0.205	TN	0.0192	YES
#	2134	O=C(CCCN1CCN(c2ccc(F)cc2)CC1)NC1c2ccccc2CSc2ccccc21	19.8852	1	1.0035	-0.0035	TP	0.057	YES
+	2776	O=C(Nc1ccc(Oc2ccnc3[nH]ccc23)c(F)c1)c1cccn(-c2ccc(F)cc2)c1=O	0.90221	0	0.2322	-0.2322	TN	0.0574	YES
-	2145	CCN1CCN(c2cc(-c3ccc(F)cc3)c3c(n2)CCCCCC3)CC1	12.6829	1	0.7108	0.2892	TP	0.0441	YES
#	3813	C=CC(=O)N1CCC(CNc2ncnc(N)c2-c2ccc(Oc3ccccc3)cc2)CC1	0.02015	0	0.1964	-0.1964	TN	0.054	YES
#	2181	COC1C(OC(C)=O)CC(=O)OC(C)CC=CC=CC(OC2CCC(N(C)C)C(C)O2)C(C)CC(CC=O)C1OC1OC(C)C(OC2CC(C)(O)C(O)C(C)O2)C(N(C)C)C1O	15.1544	1	0.8112	0.1888	TP	0.0998	YES
-	2489	CNC1CCC(N(Cc2cccc(-c3ccncc3)c2)C(=O)c2sc3c(F)ccc(F)c3c2Cl)CC1	8.94292	0	0.5589	-0.5589	FP	1.0625	YES
-	2190	CCc1ccc(C=C2SC(=S)NC2=O)cc1	15.0411	1	0.8066	0.1934	TP	0.0445	YES
-	2028	C[N+]1(CCF)C2CCC1CC(OC(=O)C(O)(c1ccccc1)c1ccccc1)C2	8.32645	0	0.5338	-0.5338	FP	1.0411	YES
#	2210	COc1cc(F)c(F)c(Nc2ccc(I)cc2F)c1NS(=O)(=O)C1(CC(O)CO)CC1	21.4526	1	1.0671	-0.0671	TP	0.0581	YES
#	2711	Cn1nnnc1SCC1=C(C(=O)O)N2C(=O)C(NC(=O)C(OC=O)c3ccccc3)C2SC1	-2.40611	0	0.0978	-0.0978	TN	0.0942	YES
*	2223	COc1cc(C(C)=O)ccc1OCCCN1CCC(c2noc3cc(F)ccc23)CC1	11.0175	1	0.6432	0.3568	TP	0.0578	YES
-	467	CC(C)(C)NCC(O)COc1nsnc1N1CCOCC1	9.13387	0	0.5666	-0.5666	FP	0.0303	YES
-	2224	Cc1ccc(Nc2nccc(N(C)c3ccc4c(C)n(C)nc4c3)n2)cc1S(N)(=O)=O	13.6632	1	0.7507	0.2493	TP	0.0785	YES
-	1369	CCN(CC)C(=O)C(C#N)=Cc1cc(O)c(O)c([N+](=O)[O-])c1	-1.44165	0	0.137	-0.137	TN	0.0466	YES
-	2236	O=C(Nc1ccc(F)c(C(F)(F)F)c1)Nc1nnc(-c2ccncc2)s1	15.3754	1	0.8202	0.1798	TP	1.0504	YES
#	3859	O=c1oc2c(C3OCCCO3)c(O)ccc2c2c1CNCC2	-0.39747	0	0.1794	-0.1794	TN	0.0516	YES
-	2238	COc1cc(C)c(Sc2cnc(NC(=O)c3ccc(CNC(C)C(C)(C)C)cc3)s2)cc1C(=O)N1CCN(C(C)=O)CC1	14.6101	1	0.7891	0.2109	TP	2.0723	No
*	2683	NS(=O)(=O)c1cc(C(=O)NN2CC3C4CCC(C4)C3C2)ccc1Cl	3.75643	0	0.3482	-0.3482	TN	0.0594	YES
#	2242	Cn1cc(C2=C(c3cn(C4CCN(Cc5ccccn5)CC4)c4ccccc34)C(=O)NC2=O)c2ccccc21	13.7052	1	0.7524	0.2476	TP	0.0927	YES
+	388	CN1CCN(C(c2ccccc2)c2ccccc2)CC1	12.4042	0	0.6995	-0.6995	FP	0.0264	YES
#	2247	Cc1ccc(NC(=O)c2ccc(CN3CCN(C)CC3)cc2)cc1Nc1nc(-c2cccnc2)cs1	17.5757	1	0.9096	0.0904	TP	0.0672	YES
#	2034	N#CC(=C1SCC(c2ccc(Cl)cc2Cl)S1)n1ccnc1	-1.22906	0	0.1456	-0.1456	TN	0.0874	YES
*	2251	OCCC#Cc1nc(-c2ccc(F)cc2)c(-c2ccncc2)n1CCCc1ccccc1	19.169	1	0.9744	0.0256	TP	0.0636	YES
-	811	O=C(O)c1ccccc1C(c1ccc(O)cc1)c1ccc(O)cc1	5.42312	0	0.4159	-0.4159	TN	0.0293	YES
*	2270	CCN(CC)CCOc1ccc(Nc2ncc3cc(-c4c(Cl)cccc4Cl)c(=O)n(C)c3n2)cc1	15.2366	1	0.8146	0.1854	TP	1.0756	YES
-	2833	CC(O)(COc1ccc(C#N)cc1)C(=O)Nc1ccc(C#N)c(C(F)(F)F)c1	3.94447	0	0.3558	-0.3558	TN	0.0756	YES
#	2273	CC(C)(C)c1cc(NC(=O)Nc2ccc(-c3cn4c(n3)sc3cc(OCCN5CCOCC5)ccc34)cc2)no1	9.40362	1	0.5776	0.4224	TP	0.1042	YES
*	161	NCCc1ccc(O)c(O)c1	0.02048	0	0.1964	-0.1964	TN	0.0137	YES
-	2279	CC(=O)OCC(=O)C1(O)C(C)CC2C3C=C(C)C4=Cc5c(cnn5-c5ccccc5)CC4(C)C3C(O)CC21C	14.1327	1	0.7697	0.2303	TP	0.0989	YES
#	1564	CC(=C(CCOC(=O)C(C)C)SSC(CCOC(=O)C(C)C)=C(C)N(C=O)Cc1cnc(C)nc1N)N(C=O)Cc1cnc(C)nc1N	0.86863	0	0.2308	-0.2308	TN	0.0841	YES
#	2289	CCOC(=O)c1c(CSc2ccccc2)n(C)c2cc(Br)c(O)c(CN(C)C)c12	18.6076	1	0.9515	0.0485	TP	0.0781	YES
#	282	C[N+](C)(C)CCOC(=O)CCC(=O)OCC[N+](C)(C)C	-1.92135	0	0.1175	-0.1175	TN	0.0225	YES
#	2298	COc1ccc2cc1Oc1ccc(cc1)CC1c3cc(c(OC)cc3CCN1C)Oc1c(O)c(OC)cc3c1C(C2)N(C)CC3	13.4517	1	0.7421	0.2579	TP	0.0674	YES
#	3744	NC(=O)c1cc(F)cc2c1C(=O)N(C1CCN(C3CCC(F)(F)CC3)CC1)C2	5.03311	0	0.4	-0.4	TN	0.0452	YES
+	2300	CC(=O)ON=C1C(=O)N(Cc2cc(Cl)ccc2Cl)c2ccc(Cl)cc21	1.71392	1	0.2652	0.7348	FN	3.0667	No
*	2153	O=C(O)Cc1sc(-c2ccccc2)nc1-c1ccc(Cl)cc1	-0.98696	0	0.1554	-0.1554	TN	0.046	YES
+	2304	COc1c(C)cnc(Cn2cnc3c(Cl)nc(N)nc32)c1C	7.33809	1	0.4937	0.5063	FN	1.0465	YES
*	477	CCn1cc(C(=O)O)c(=O)c2cnc(N3CCNCC3)nc21	-2.0897	0	0.1106	-0.1106	TN	0.0469	YES
#	2305	CCNC(=O)c1noc(-c2cc(C(C)C)c(O)cc2O)c1-c1ccc(CN2CCOCC2)cc1	17.9744	1	0.9258	0.0742	TP	0.0693	YES
-	2274	CS(=O)(=O)c1ccc(C(=O)Nc2ccc(Cl)c(-c3ccccn3)c2)c(Cl)c1	12.0642	0	0.6857	-0.6857	FP	0.0716	YES
#	2307	O=C(NC(c1ccccc1)C1CCCCN1)c1cccc(C(F)(F)F)c1Cl	16.401	1	0.8619	0.1381	TP	0.0407	YES
+	142	CC(C)=CCCC(C)=CCCC(C)=CCSc1ccccc1C(=O)O	0.65056	0	0.222	-0.222	TN	0.0486	YES
#	2321	Cc1ccc(C(=O)Nc2cccc(C(F)(F)F)c2)cc1Nc1nc(-c2cccnc2)nc2c1cnn2C	14.2011	1	0.7725	0.2275	TP	0.0756	YES
-	2807	CCC(c1ccccc1)c1c(O)c2ccccc2oc1=O	3.34804	0	0.3316	-0.3316	TN	1.026	YES
#	2326	O=C(Nc1ccc(S(=O)(=O)N2CCOCC2)cc1)c1cc(Cl)ccc1NS(=O)(=O)c1ccc(Cl)s1	19.6812	1	0.9952	0.0048	TP	0.1074	YES
#	1768	CCCNC(C)C(=O)Nc1c(C)csc1C(=O)OC	-5.2188	0	-0.0165	0.0165	TN	0.0318	YES
-	2338	CN(C)CCOC(c1ccccc1)c1ccc(Br)cc1	17.0931	1	0.89	0.11	TP	0.0456	YES
#	884	CC=CC=CC(=O)O	-3.55373	0	0.0512	-0.0512	TN	0.0152	YES
+	2361	CN(C)CCCOC1(Cc2ccccc2)CCCCCC1	11.8614	1	0.6775	0.3225	TP	0.02	YES
#	3569	CNC(=O)c1c(C)oc2cc(Oc3ncnc4cc(OC)c(OC)cc34)ccc12	-2.03875	0	0.1127	-0.1127	TN	0.0557	YES
*	2392	CN1CCN(c2cc(C(=O)Nc3ccc4c(c3)-c3c(c(C(N)=O)nn3-c3ccc(F)cc3)CC4)c(Cl)cn2)CC1	9.958	1	0.6001	0.3999	TP	3.083	No
#	2518	Cn1cc(-c2[nH]c3cc(NC(=O)C(N)C4CCCCC4)cc4c3c2C=NNC4=O)cn1	3.47845	0	0.3369	-0.3369	TN	0.0623	YES
#	2394	Cc1c(CCOc2ccc(C(=O)O)cc2)c2cc(Cl)ccc2n1C(c1ccccc1)c1ccccc1	14.5708	1	0.7875	0.2125	TP	0.0609	YES
+	1016	Cc1ncc([N+](=O)[O-])n1CC(C)O	-0.65154	0	0.1691	-0.1691	TN	0.0175	YES
+	2401	Cc1ccc(F)c(NC(=O)Nc2ccc(-c3cccc4n[nH]c(N)c34)cc2)c1	1.2533	1	0.2465	0.7535	FN	0.0489	YES
-	1707	C=CC1CN2CCC1CC2C(OC(=O)OCC)c1ccnc2ccc(OC)cc12	6.98177	0	0.4792	-0.4792	TN	0.0479	YES
*	2403	Cn1c(Nc2ccc(C(F)(F)F)cc2)nc2cc(Oc3ccnc(-c4ncc(C(F)(F)F)[nH]4)c3)ccc21	19.9508	1	1.0061	-0.0061	TP	1.0751	YES
*	1900	CC(=O)Nc1c(I)c(C(=O)O)c(I)c(N(C)C(C)=O)c1I	-6.28961	0	-0.06	0.06	TN	0.0435	YES
+	2405	O=C(O)c1ccc(-c2c[nH]c3ncc(-c4ccccc4)cc23)cc1C1CCCC1	15.1586	1	0.8114	0.1886	TP	1.055	YES
*	875	CCCCCCCCCCCCCCCCCC(=O)O	3.32961	0	0.3308	-0.3308	TN	0.0181	YES
-	2415	CC1CCCCN1CCCOC(=O)c1ccc(OC2CCCCC2)cc1	9.21043	1	0.5698	0.4302	TP	0.0384	YES
#	3446	CCCCOc1nc(N)c2c(n1)N(Cc1cccc(CN3CCCC3)c1)CC(=O)N2	1.39869	0	0.2524	-0.2524	TN	0.0541	YES
*	2436	CN(C)C(CCOc1cccc2ccccc12)c1ccccc1	16.3255	1	0.8588	0.1412	TP	0.0275	YES
-	653	Nc1ncnc2c1ncn2C1OC(CO)C(O)C1O	-0.86751	0	0.1603	-0.1603	TN	0.0433	YES
+	2441	Cc1cccc(Nc2nc(NC3CCCCC3N)ncc2C(N)=O)c1	8.02909	1	0.5218	0.4782	TP	1.0481	YES
*	1992	NCCCCC(NC(=O)C1CCCN1C(=O)C1CSSCC(N)C(=O)NC(Cc2ccccc2)C(=O)NC(Cc2ccccc2)C(=O)NC(CCC(N)=O)C(=O)NC(CC(N)=O)C(=O)N1)C(=O)NCC(N)=O	-4.63118	0	0.0074	-0.0074	TN	0.1105	YES
-	2475	CCC(CN)=C(c1ccccc1)c1ccccc1	12.2482	1	0.6932	0.3068	TP	0.0219	YES
+	3869	CCCCCCCCCCCCCCCC(=O)OC1CCCn2c1nc(C)c(CCN1CCC(c3noc4cc(F)ccc34)CC1)c2=O	-0.87547	0	0.16	-0.16	TN	2.0726	No
+	2483	Cc1nn(Cc2ccccc2Cl)c(C)c1CN(C)CC(O)COc1ccc(Cl)cc1	7.75005	1	0.5104	0.4896	TP	1.0541	YES
+	587	CCC(NC(C)C)C(O)c1ccc(O)c2[nH]c(=O)ccc12	4.12489	0	0.3631	-0.3631	TN	0.0226	YES
*	2485	COc1cc2nc(-c3ccc(N4CCN(C)CC4)cc3)nc(NCCN3CCOCC3)c2cc1OC	11.7703	1	0.6738	0.3262	TP	0.0633	YES
-	1579	CCOc1nc2cccc(C(=O)O)c2n1Cc1ccc(-c2ccccc2-c2nn[nH]n2)cc1	6.65355	0	0.4659	-0.4659	TN	0.0637	YES
-	2495	Cc1cccc(C=NNc2cc(N3CCOCC3)nc(OCCc3ccccn3)n2)c1	15.1776	1	0.8122	0.1878	TP	0.0624	YES
+	2123	CC(C(=O)O)c1ccc(C2CCCCC2)c2ccccc12	7.9163	0	0.5172	-0.5172	FP	0.0304	YES
*	2496	Cc1csc(-c2nnc(Nc3ccc(Oc4ncccc4-c4ccnc(N)n4)cc3)c3ccccc23)c1	-2.96816	1	0.075	0.925	FN	1.0915	YES
*	984	Cc1c(C(N)=O)cc([N+](=O)[O-])cc1[N+](=O)[O-]	1.82114	0	0.2695	-0.2695	TN	0.021	YES
+	2508	CCCCCCCc1ccc(CCc2cccc(O)c2C(=O)O)cc1	3.81716	1	0.3506	0.6494	FN	0.0338	YES
#	3675	C=CC(=O)N1CC(Nc2ncnc3[nH]ccc23)CCC1C	-3.14218	0	0.0679	-0.0679	TN	0.0425	YES
*	2515	CCN(CC)CCCCNc1nc2cc(Cl)c(Cl)cc2nc1-c1ccc(-c2cccs2)s1	13.0187	1	0.7245	0.2755	TP	4.0731	No
*	618	CC1CC2C3CC(F)C4=CC(=O)C=CC4(C)C3(F)C(O)CC2(C)C1(O)C(=O)CO	2.66216	0	0.3037	-0.3037	TN	1.0483	YES
+	2525	O=C(O)C(=O)c1cn(Cc2ccccc2)c2ccc(-c3ccc(OC(F)(F)F)cc3)cc12	14.5275	1	0.7858	0.2142	TP	0.0476	YES
+	3101	Clc1ccc(CCCOCCCN2CCCCC2)cc1	10.1082	0	0.6062	-0.6062	FP	2.0281	No
-	2531	Nc1nc(Nc2ccc(S(N)(=O)=O)cc2)nn1C(=O)c1c(F)cccc1F	11.2999	1	0.6546	0.3454	TP	1.0637	YES
+	207	CC12CC3CC(C)(C1)CC(N)(C3)C2	0.99812	0	0.2361	-0.2361	TN	0.025	YES
-	2535	S=C(NCc1ccc2c(c1)OCO2)N1CCN(c2ncnc3c2oc2ccccc23)CC1	11.5337	1	0.6641	0.3359	TP	2.0653	No
-	698	C#CCN(C)C(C)Cc1ccccc1	9.72114	0	0.5905	-0.5905	FP	0.0267	YES
+	2545	c1ccc2c(CCNc3ccc(Nc4ccncc4)cc3)c[nH]c2c1	10.0563	1	0.6041	0.3959	TP	0.041	YES
+	777	CC(C=CC1=C(C)CCCC1(C)C)=CC=CC(C)=CC(=O)Nc1ccc(O)cc1	2.12174	0	0.2817	-0.2817	TN	0.0452	YES
-	2565	COc1ccc(C2CC(c3ccccc3)=NN2c2ccc(S(N)(=O)=O)cc2)cc1	13.7584	1	0.7545	0.2455	TP	0.0624	YES
-	1312	CC(C(O)CCC(C)(C)O)C1CCC2(O)C3=CC(=O)C4CC(O)C(O)CC4(C)C3CCC12C	0.38054	0	0.211	-0.211	TN	0.043	YES
#	2568	Cc1c(C(=O)Nc2cccc(C(F)(F)F)c2)cc(-c2ccccc2)n1CCCN1CCOCC1	17.4602	1	0.9049	0.0951	TP	0.0566	YES
#	1341	O=c1n(Cl)c(=O)n(Cl)c(=O)n1Cl	-6.26877	0	-0.0591	0.0591	TN	0.0508	YES
*	2573	CCOC(CN1C(=O)C(CC(=O)Nc2ccc(C)cc2)(NC(=O)Nc2ccc(C)cc2)c2ccccc21)OCC	17.9274	1	0.9239	0.0761	TP	0.061	YES
-	3601	CC1OC(OC2CCC3(C)C(CCC4(C)C3C=CC3=C5CC(C)(C)CCC5(CO)C(O)CC34C)C2(C)CO)C(O)C(OC2OC(CO)C(O)C(O)C2O)C1O	5.10467	0	0.4029	-0.4029	TN	2.125	No
#	2578	CN(C)c1ccc(C2Nc3ccc4ccccc4c3C3=C2C(=O)CC(C)(C)C3)cc1Br	14.8494	1	0.7989	0.2011	TP	0.0572	YES
#	2460	CCC1C2CC3C4N(C)c5ccccc5C45CC(C2C5O)N3C1O	3.77861	0	0.3491	-0.3491	TN	0.0822	YES
*	2600	CN1CC2c3ccccc3Oc3ccc(Cl)cc3C2C1	18.6533	1	0.9534	0.0466	TP	0.0394	YES
+	3549	NC1CCC(NC2CC2c2ccccc2)CC1	1.00394	0	0.2363	-0.2363	TN	0.0212	YES
-	2621	CCCCCCCCCCCCCCCc1cccc(O)c1C(=O)O	8.07227	1	0.5235	0.4765	TP	0.0272	YES
+	3339	CCCCNc1ncc(-c2ccc(CN3CCOCC3)cn2)c(NC2CCC(O)CC2)n1	9.92225	0	0.5987	-0.5987	FP	0.0635	YES
#	2651	CN1CCCC(CC2c3ccccc3Sc3ccccc32)C1	17.2439	1	0.8961	0.1039	TP	0.0322	YES
#	432	COc1ncnc(NS(=O)(=O)c2ccc(N)cc2)c1OC	1.58809	0	0.2601	-0.2601	TN	0.0514	YES
-	2691	Cc1cnc(NC(=O)Nc2cc(Br)c(C)cc2OCC2CNCCO2)cn1	13.7124	1	0.7527	0.2473	TP	0.0703	YES
+	952	c1ccc2c(c1)sc1ccccc12	4.48915	0	0.3779	-0.3779	TN	1.0202	YES
-	2693	c1ccc2c(Oc3nc(Nc4ccc(N5CCOCC5)cc4)c4ncn(C5CCCCC5)c4n3)cccc2c1	7.29129	1	0.4918	0.5082	FN	0.1274	YES
#	3609	CCCCCCCCCCC(=O)OC1CCC2C3CCC4=CC(=O)CCC4(C)C3CCC12C	2.28471	0	0.2884	-0.2884	TN	0.0473	YES
+	2701	COc1cccc(C(C)NCCCc2ccccc2Cl)c1	10.4849	1	0.6215	0.3785	TP	0.0346	YES
+	1210	CCOc1cc(N)c(Cl)cc1C(=O)NCC1CN(Cc2ccc(F)cc2)CCO1	4.82437	0	0.3916	-0.3916	TN	0.0445	YES
+	2745	CC(C)C1C(=O)NC(CO)Cc2c[nH]c3cccc(c23)N1C	7.00229	1	0.48	0.52	FN	1.0335	YES
*	478	COc1ccc2c(c1)c(CC(=O)OCC(=O)O)c(C)n2C(=O)c1ccc(Cl)cc1	-3.33739	0	0.0599	-0.0599	TN	0.0534	YES
#	2758	CN1CCC(COc2cnc(-c3cccc(Cn4nc(-c5cccc(C#N)c5)ccc4=O)c3)nc2)CC1	14.1357	1	0.7699	0.2301	TP	0.0992	YES
-	3051	COc1ccc(CCC(=O)Nc2nc3ccc(Cl)cc3s2)cc1OC	1.29183	0	0.248	-0.248	TN	4.0494	No
+	2764	CC(C)CC(NC(=O)C(Cc1ccccc1)NC(=O)OCc1ccccc1)C(=O)C=O	3.50958	1	0.3381	0.6619	FN	0.0406	YES
#	3374	N#Cc1ccc(N(Cc2ccc(Br)cc2)n2cnnc2)cc1	1.8453	0	0.2705	-0.2705	TN	0.0758	YES
+	2765	O=C(NCc1ccccc1)C(Cc1ccccc1)NC(=O)C1OC1C(=O)NCCc1ccc(O)cc1	13.9703	1	0.7631	0.2369	TP	0.0541	YES
+	2921	CC1C(=O)OC2CC34C5CC(C(C)(C)C)C36C(OC(=O)C6O)OC4(C(=O)O5)C21O	-11.9062	0	-0.2882	0.2882	TN	10.0743	No
-	2770	COc1ccc(-c2oc3c(CC=C(C)C)c(O)cc(O)c3c(=O)c2O)cc1	6.37248	1	0.4544	0.5456	FN	1.0389	YES
+	3389	CCNCc1nc2c(N)nc3ccccc3c2n1CC(C)(C)O	2.04381	0	0.2786	-0.2786	TN	0.0407	YES
-	2775	CC(C)(N)c1ccc(-c2nc3ccccc3nc2-c2ccccc2)cc1	6.53995	1	0.4613	0.5387	FN	0.0406	YES
*	356	CN(C)Cc1c[nH]c2ccccc12	3.75599	0	0.3481	-0.3481	TN	0.0115	YES
*	2782	CCc1nc(-c2cccc(C)c2)c(-c2ccnc(NC(=O)c3ccccc3)c2)s1	25.2194	1	1.2202	-0.2202	TP	1.0457	YES
*	444	C=C1c2cccc(O)c2C(=O)C2=C(O)C3(O)C(=O)C(C(N)=O)C(=O)C(N(C)C)C3C(O)C12	-3.93702	0	0.0356	-0.0356	TN	0.0588	YES
-	2783	O=C1NC(=O)C(=Cc2cccc(C(F)(F)F)c2)S1	8.08196	1	0.5239	0.4761	TP	0.0478	YES
+	303	CC(C)(C)NCC(O)c1ccccc1Cl	4.40465	0	0.3745	-0.3745	TN	0.0156	YES
#	2789	COc1ccc2c(Oc3ccc(NC(=O)c4c(C)n(CC(C)(C)O)n(-c5ccccc5)c4=O)cc3F)ccnc2c1	17.1738	1	0.8933	0.1067	TP	0.0988	YES
-	1869	CCCCCc1ccc(C)cc1O	4.72754	0	0.3876	-0.3876	TN	0.0194	YES
+	2790	CN(C)CC(=O)N1CCC(c2ccc(NC(=O)c3ncc(C#N)[nH]3)c(C3=CCCCC3)c2)CC1	5.60326	1	0.4232	0.5768	FN	0.0654	YES
*	1331	C[Si](C)(C)O[Si](C)(C)O[Si](C)(C)C	-0.61398	0	0.1706	-0.1706	TN	0.0093	YES
-	2803	NC(=O)c1cccc2cn(-c3ccc(C4CCCNC4)cc3)nc12	9.87789	1	0.5969	0.4031	TP	0.0431	YES
-	1755	CCC(CO)NCCNC(CC)CO	6.14754	0	0.4453	-0.4453	TN	0.0123	YES
+	2822	CC(NC(=O)C(=O)Nc1ccccc1C(C)(C)C)C(=O)NC(CC(=O)O)C(=O)COc1c(F)c(F)cc(F)c1F	-2.62944	1	0.0887	0.9113	FN	0.0551	YES
-	2102	O=[N+]([O-])c1ccc(C=Cc2cccc(CO)n2)o1	2.50475	0	0.2973	-0.2973	TN	2.0355	No
#	2825	Cc1c(NC(=O)OCC2COCCN2)cn2ncnc(Nc3ccc4c(cnn4Cc4cccc(F)c4)c3)c12	12.5981	1	0.7074	0.2926	TP	0.0908	YES
+	2934	O=C(Nc1cccc(Nc2ncc(Br)c(NCCc3cnc[nH]3)n2)c1)N1CCCC1	8.0921	0	0.5243	-0.5243	FP	0.0761	YES
*	2842	Cc1ccc(NC(=O)c2ccc(CN3CCC(N(C)C)C3)c(C(F)(F)F)c2)cc1Nc1ncc(-c2cncnc2)cn1	18.2853	1	0.9384	0.0616	TP	0.0803	YES
+	3362	O=C(Nc1ccc2c(c1)CCN(Cc1nnc[nH]1)C2)c1ccccc1-c1ccc(C(F)(F)F)cc1	10.2431	0	0.6117	-0.6117	FP	0.0637	YES
#	2849	CCC1C=CC=CCC(C)C(O)C(C)(O)C(=O)C(C)C(O)C(C)C(=O)C(C)C(O)C(C)C=CC(=O)OC2C(C)C(CC1)OC1(CCC(C)C(CC(C)O)O1)C2C	14.015	1	0.765	0.235	TP	0.073	YES
#	1799	CC(CNC1CCCCC1)OC(=O)c1ccccc1	5.65663	0	0.4254	-0.4254	TN	0.0229	YES
+	2853	CC(C)(C)Cn1c(N)nc2ccc(-c3nc(C(C)(C)C)[nH]c3-c3ccc(F)cc3)nc21	10.3227	1	0.6149	0.3851	TP	3.0513	No
*	3594	CC(C)=CCCC(C)(O)C1CCC2(C)C1C(O)CC1C3(C)CCC(OC4OC(CO)C(O)C(O)C4O)C(C)(C)C3CCC12C	-4.10576	0	0.0287	-0.0287	TN	0.0577	YES
*	2856	COc1cc(Nc2nc3ccccc3nc2NS(=O)(=O)c2ccc(NC(=O)c3ccc(C)c(OC)c3)cc2)cc(OC)c1	15.8209	1	0.8383	0.1617	TP	0.0764	YES
-	1791	CCC1NC(=O)c2cc(S(N)(=O)=O)c(Cl)cc2N1	7.16015	0	0.4865	-0.4865	TN	0.0558	YES
#	2857	CNC(=O)c1ccc2c(c1)NC(=O)/C2=C(/Nc1cccc(CN(C)C)c1)c1ccccc1	11.793	1	0.6747	0.3253	TP	0.0504	YES
+	976	CC(C(=O)O)c1ccc(C(=O)c2cccs2)cc1	-1.27101	0	0.1439	-0.1439	TN	3.0291	No
-	2861	CCCCCCCCCCCCc1ccc(S(=O)(=O)Nc2nncs2)cc1	9.70999	1	0.59	0.41	TP	2.0644	No
+	1267	Cc1cccc(C)c1NC(=O)C(C)N	3.75552	0	0.3481	-0.3481	TN	0.0216	YES
+	2884	C=C1C(=O)C23C(O)C1CCC2C12COC3(O)C(O)C1C(C)(C)CCC2O	8.55557	1	0.5431	0.4569	TP	0.0516	YES
#	436	N=C(N=C(N)N)N1CCOCC1	-2.25376	0	0.104	-0.104	TN	0.0411	YES
+	2888	CNC(C)C1C(O)CC2(C)C3CCC4C(C)(C)C(NC)CCC45CC35CCC12C	20.7222	1	1.0375	-0.0375	TP	3.0548	No
*	386	CCCCN(CCCC)CCCOC(=O)c1ccc(N)cc1	4.06871	0	0.3608	-0.3608	TN	0.0239	YES
-	2899	O=C1NC(=O)/C(=C/c2ccc(-c3ccc(F)cc3)o2)S1	7.60468	1	0.5045	0.4955	TP	1.0449	YES
-	3903	Cc1ccc(Nc2nnc(Cc3ccncc3)c3ccccc23)cc1Br	7.25066	0	0.4901	-0.4901	TN	0.0476	YES
-	2903	Cn1cc(-c2ccncc2)c(-c2ccc(OCc3ccc4ccccc4n3)cc2)n1	14.3126	1	0.777	0.223	TP	0.0634	YES
+	1455	CCC(O)c1ccccc1	1.15314	0	0.2424	-0.2424	TN	0.009	YES
-	2943	COc1cc(NC(=O)c2ccc(-c3ccc(Cl)cc3)o2)cc(OC)c1	13.4343	1	0.7414	0.2586	TP	1.046	YES
+	2643	O=C(O)C(O)C(O)C(O)C(O)C(O)CO	-12.1771	0	-0.2992	0.2992	TN	0.0116	YES
-	2953	COc1cc(CCc2cc(NC(=O)c3ccc(N4CC(C)NC(C)C4)cc3)[nH]n2)cc(OC)c1	7.10435	1	0.4842	0.5158	FN	0.0562	YES
#	2165	Nc1ccn(CC(CO)OCP(=O)(O)O)c(=O)n1	-1.42086	0	0.1378	-0.1378	TN	0.0413	YES
*	2965	CC(O)(C#Cc1ccc2c(c1)N(c1nc(N)ncc1Cl)CC2)c1nccs1	8.16138	1	0.5271	0.4729	TP	2.0672	No
+	907	COC1CCC(C(=O)c2ccc3nc4c(cc3c2)CCCO4)CC1	0.33578	0	0.2092	-0.2092	TN	0.0418	YES
+	2968	NC(=O)c1cccc(-c2cc(Nc3ccc(OC(F)(F)F)cc3)ncn2)c1	12.0332	1	0.6844	0.3156	TP	0.0524	YES
-	1270	O=P(O)(O)C(Cl)(Cl)P(=O)(O)O	-1.5387	0	0.133	-0.133	TN	0.049	YES
-	2995	NC(=O)c1noc(C(CCCC2CCCCC2)CC(=O)NO)n1	3.83229	1	0.3512	0.6488	FN	3.0401	No
-	2599	O=C1Cc2cc(CCN3CCN(c4nsc5ccccc45)CC3)c(Cl)cc2N1	3.32548	0	0.3307	-0.3307	TN	2.0753	No
-	3001	CC1(N2CCC(n3c(C4CCCNC4)nc4ccccc43)CC2)CCCCCCC1	15.0348	1	0.8064	0.1936	TP	2.0556	No
#	83	Cn1c(=O)c2c(ncn2C)n(C)c1=O	0.42091	0	0.2126	-0.2126	TN	0.0405	YES
#	3003	Cc1ccc(NC(=O)Nc2cc(C(F)(F)F)ccc2F)cc1Nc1ccc2c(c1)NC(=O)C2=Cc1ccc[nH]1	24.6586	1	1.1974	-0.1974	TP	0.0755	YES
*	1007	CCCCc1nc(Cl)c(CO)n1Cc1ccc(-c2ccccc2-c2nn[nH]n2)cc1	2.94333	0	0.3151	-0.3151	TN	0.0618	YES
*	3020	c1ccc(CNc2nc(N3CCOc4ccccc43)nc3c2CCCC3)cc1	14.7928	1	0.7966	0.2034	TP	2.0579	No
-	1535	FCOC(C(F)(F)F)C(F)(F)F	5.39949	0	0.4149	-0.4149	TN	1.022	YES
*	3026	N#Cc1c(C2CCNCC2)cc(-c2c(O)cccc2OCC2CC2)nc1N	19.4664	1	0.9864	0.0136	TP	0.0654	YES
#	3097	Cc1cccc(Oc2cnc(=O)[nH]c2)c1	-5.14019	0	-0.0133	0.0133	TN	0.0205	YES
*	3033	O=C1CSC(=O)N1C(CCc1ccncc1)COc1ccc(-c2cccc([N+](=O)[O-])c2)cc1	24.399	1	1.1868	-0.1868	TP	0.0637	YES
*	782	CC12C=CC(=O)C=C1CCC1C2C(=O)CC2(C)C1CCC2(O)C(=O)CO	0.74494	0	0.2258	-0.2258	TN	0.0419	YES
-	3073	COc1ccc(C(O)C(C)Oc2ccc(C3OC(c4ccc(OC(C)C(O)c5ccc(OC)c(OC)c5)c(OC)c4)C(C)C3C)cc2OC)cc1OC	15.873	1	0.8404	0.1596	TP	0.1064	YES
#	3832	NC(C(=O)NC1C(=O)N2C(C(=O)O)=C(Cl)CCC12)c1ccccc1	-13.1687	0	-0.3395	0.3395	TN	0.0509	YES
-	3081	Cc1cc(Nc2ncc(Cl)c(Nc3ccccc3S(=O)(=O)C(C)C)n2)c(OC(C)C)cc1C1CCNCC1	14.7295	1	0.794	0.206	TP	0.0784	YES
#	2522	CNC(=O)c1ccc(N2C(=S)N(c3ccc(C#N)c(C(F)(F)F)c3)C(=O)C23CCC3)cc1F	-1.28556	0	0.1433	-0.1433	TN	0.0852	YES
-	3083	NC(=O)c1cnc(NC2CCCCC2N)nc1Nc1cccc(-n2nccn2)c1	11.9604	1	0.6815	0.3185	TP	1.0652	YES
#	3918	CC(C)(C)NCC(O)COc1ccccc1C#N	7.41909	0	0.497	-0.497	TN	0.0306	YES
-	3084	CCOc1ccccc1-n1c(C(C)N2CCN(C(=O)COc3ccc(Cl)cc3)CC2)nc2ccccc2c1=O	9.09076	1	0.5649	0.4351	TP	0.0694	YES
#	2096	CNC(=NCc1ccccc1)NC	4.60244	0	0.3825	-0.3825	TN	0.0233	YES
*	3089	Cc1cn(CCN2CCN(c3ccccc3-c3cc(C#N)cc(C(=O)NCCCN4CCCC4)c3)CC2)c2ccccc12	8.80073	1	0.5531	0.4469	TP	3.0762	No
+	643	Cc1ccc(Cl)c(Nc2ccccc2C(=O)O)c1Cl	0.67449	0	0.2229	-0.2229	TN	0.0347	YES
+	3110	Cn1c(NCC(N)Cc2ccccc2)nc(-c2ccncc2)c(-c2ccc3ccccc3c2)c1=O	16.3414	1	0.8595	0.1405	TP	0.0523	YES
*	1286	COc1cc(C)c(C=CC(C)=CC=CC(C)=CC(=O)O)c(C)c1C	-0.3327	0	0.182	-0.182	TN	0.0367	YES
+	3121	COc1ccc(CNC(=O)Nc2ncc([N+](=O)[O-])s2)cc1	7.5335	1	0.5016	0.4984	TP	2.0384	No
*	2930	CC(C)c1cc(-c2n[nH]c(=O)n2-c2ccc3c(ccn3C)c2)c(O)cc1O	3.7613	0	0.3484	-0.3484	TN	1.0444	YES
-	3122	N#Cc1ccc2[nH]cc(CCCCN3CCN(c4ccc5oc(C(N)=O)cc5c4)CC3)c2c1	13.5589	1	0.7464	0.2536	TP	0.0835	YES
-	893	O=C(O)c1ccc2cc(-c3ccc(O)c(C45CC6CC(CC(C6)C4)C5)c3)ccc2c1	-1.24448	0	0.145	-0.145	TN	0.0713	YES
+	3125	CCCN1CCN(c2ccc(C(=O)NC3(C(=O)NCC#N)CCCCC3)cc2)CC1	9.39391	1	0.5772	0.4228	TP	1.0575	YES
+	2192	Cc1cccc(C)c1NC(=O)CN1CCCC1=O	2.23586	0	0.2864	-0.2864	TN	0.0356	YES
+	3145	O=c1ccc2ccc(OCCCCN3CCN(c4cccc5sccc45)CC3)cc2[nH]1	16.4687	1	0.8646	0.1354	TP	6.0648	No
*	333	Cc1cc(C(=O)NNCc2ccccc2)no1	-3.60322	0	0.0491	-0.0491	TN	0.0263	YES
*	3147	CNC(C)C(=O)NC(C(=O)N1CCCC1c1nc(C(=O)c2ccc(F)cc2)cs1)C1CCCCC1	8.16836	1	0.5274	0.4726	TP	1.0503	YES
-	2831	C=CC(=O)Nc1cccc(Sc2nc(Nc3ccc(N4CCN(C)CC4)cc3)ncc2Cl)c1	3.66795	0	0.3446	-0.3446	TN	0.0757	YES
*	3148	COc1cc(NC(=O)Nc2cccc(CNC(=O)OC3CCOC3)c2)ccc1-c1cnco1	11.1588	1	0.6489	0.3511	TP	0.0694	YES
-	3690	NCCCCC(N)C(=O)NC(CCCCN)C(=O)NC(Cc1c[nH]c2ccccc12)C(=O)NC(Cc1c[nH]c2ccccc12)C(=O)NC(CCCCN)C(=O)NC(CCCCN)C(=O)NC(Cc1c[nH]c2ccccc12)C(=O)NC(C(=O)NC(CCCCN)C(N)=O)C(c1ccccc1)c1ccccc1	5.33963	0	0.4125	-0.4125	TN	0.1284	YES
#	3155	Cc1ncc(NC(=O)c2ccc(CN3CCN(C)CC3)c(C(F)(F)F)c2)cc1Nc1nccc(-c2cccnc2)n1	23.247	1	1.14	-0.14	TP	0.0778	YES
#	3629	Nc1ccn(C2C(F)=C(CO)C(O)C2O)c(=O)n1	-0.70653	0	0.1668	-0.1668	TN	0.0449	YES
+	3170	CCCC(NC1CCc2cc(F)cc(F)c2C1)C(=O)Nc1cn(C(C)(C)CNCC(C)(C)C)cn1	14.5563	1	0.7869	0.2131	TP	0.0454	YES
+	599	COCCc1ccc(OCC(O)CNC(C)C)cc1	8.72305	0	0.5499	-0.5499	FP	0.0227	YES
-	3205	COc1cccc(N2CCN(C3=Nc4c(F)cccc4C(CC(=O)O)N3c3cc(C(F)(F)F)ccc3OC)CC2)c1	11.7662	1	0.6736	0.3264	TP	1.0833	YES
+	2644	O=C(O)C(S)C(S)C(=O)O	-5.53343	0	-0.0293	0.0293	TN	0.0226	YES
#	3208	O=C1NC(=O)C(c2cnc3ccccn23)=C1c1cn2c3c(cc(F)cc13)CN(C(=O)N1CCCCC1)CC2	12.2056	1	0.6914	0.3086	TP	0.0741	YES
-	2794	Cc1nc2c([nH]1)CCN(C(=O)c1ccc(NC(=O)c3ccccc3-c3ccccc3)cc1)c1ccccc1-2	3.09094	0	0.3211	-0.3211	TN	3.0525	No
-	3212	Cn1cc(-c2cc(Oc3cc(F)c(NC(=O)C4(C(=O)Nc5ccccc5)CC4)cc3F)ccn2)cn1	11.8368	1	0.6765	0.3235	TP	0.0839	YES
+	2052	CCC(c1ccccc1)c1noc(CCN(CC)CC)n1	12.2386	0	0.6928	-0.6928	FP	0.0289	YES
*	3224	C=CC1(C)CC(OC(=O)CSC2CC3CCC(C2)N3C)C2(C)C(C)CCC3(CCC(=O)C32)C(C)C1O	16.1586	1	0.852	0.148	TP	0.0698	YES
#	441	CCOC(=O)NNc1nncc2ccccc12	4.82781	0	0.3917	-0.3917	TN	0.028	YES
+	3239	CS(=O)(=O)N1CCC(NC(=O)c2[nH]ncc2NC(=O)c2c(Cl)cccc2Cl)CC1	-0.62472	1	0.1702	0.8298	FN	0.0778	YES
+	2605	Fc1ccc(CNc2ncnc3ccc(F)cc23)cc1	6.37248	0	0.4544	-0.4544	TN	0.0425	YES
*	3246	CCCCCOc1ccc(-c2ccc(-c3ccc(C(=O)NC4CC(O)C(O)NC(=O)C5C(O)C(C)CN5C(=O)C(C(C)O)NC(=O)C(C(O)C(O)c5ccc(O)cc5)NC(=O)C5CC(O)CN5C(=O)C(C(C)O)NC4=O)cc3)cc2)cc1	1.65499	1	0.2628	0.7372	FN	0.1559	YES
#	1923	CS(=O)(=O)OCC(O)C(O)COS(C)(=O)=O	-3.40958	0	0.057	-0.057	TN	0.0416	YES
+	3251	CCCC1(CCC)CCC2(CCN(CCCN(CC)CC)C2)CC1	7.02648	1	0.481	0.519	FN	0.0201	YES
+	88	COc1ccc2c(c[n+](C)c3c4cc5c(cc4ccc23)OCO5)c1OC	-0.35915	0	0.181	-0.181	TN	3.0657	No
*	3252	CC1(C)CN2C(CSC(=NC3CCCCC3)NC3CCCCC3)=CSC2=N1	13.401	1	0.74	0.26	TP	5.0683	No
*	2757	N#Cc1ccc(Oc2ccc3c(c2)COB3O)cc1	1.50232	0	0.2566	-0.2566	TN	0.0329	YES
+	3266	CON(C)C(=O)N1N=C(c2cc(F)ccc2F)SC1(CCCN)c1ccccc1	16.7672	1	0.8768	0.1232	TP	6.0469	No
+	3774	COc1cnc(-n2cnc(C)n2)c2c1c(C(=O)C(=O)N1CCN(C(=O)c3ccccc3)CC1)cn2COP(=O)(O)O	-5.94923	0	-0.0462	0.0462	TN	1.0858	YES
#	3278	Cc1nc(C)c(CN2CCN(C(c3ccc(F)cc3)c3ccc(F)cc3)CC2)nc1C	15.0498	1	0.807	0.193	TP	0.0426	YES
*	255	CCCn1cnc2c1c(=O)n(CCCCC(C)=O)c(=O)n2C	-6.62939	0	-0.0738	0.0738	TN	0.0447	YES
#	3286	Nc1ncnc2c1c(-c1cccc(OCc3ccccc3)c1)cn2C1CC(CN2CCCC2)C1	9.78201	1	0.593	0.407	TP	0.0613	YES
#	1473	OCC=Cc1ccccc1	6.06459	0	0.4419	-0.4419	TN	0.0165	YES
+	3297	Cc1cncc(CN2CCC(=C3c4ccc(Cl)cc4CCc4cccnc43)CC2)c1	15.2898	1	0.8167	0.1833	TP	2.0738	No
#	2966	Cc1cncc2cccc(S(=O)(=O)N3CCCN(C(=O)CN)CC3C)c12	9.5286	0	0.5827	-0.5827	FP	0.0599	YES
*	3302	Cn1nc(C(C)(C)C)cc1C(=O)NC(Cc1cccc(Cl)c1)C(=O)NCC#N	16.9517	1	0.8843	0.1157	TP	0.0607	YES
#	881	CC12CCC(CC1)C(C)(C)O2	0.61549	0	0.2205	-0.2205	TN	0.0158	YES
-	3312	CCC(C)Nc1cc(C(=O)NC2CC3CCC(C2)N3c2ccc(C(=O)C3CC3)cn2)c(C)cc1C(N)=O	3.79298	1	0.3496	0.6504	FN	0.0665	YES
-	1962	O=C(O)c1ccccc1Nc1cc(Cl)ccc1C(=O)O	3.8827	0	0.3533	-0.3533	TN	0.04	YES
*	3322	CNCc1ccc(-c2cc(-c3nc(-c4ccc(S(=O)(=O)C(C)C)cc4)cnc3N)on2)cc1	16.0646	1	0.8482	0.1518	TP	1.087	YES
*	1289	CC(C)(C)NCC(O)c1cc(Cl)c(N)c(Cl)c1	-3.91662	0	0.0364	-0.0364	TN	0.0336	YES
+	3327	CC(NC(=O)C(Cc1ccccc1)NC(=O)OCc1ccccc1)C(=O)CF	2.54885	1	0.2991	0.7009	FN	2.0373	No
*	1105	O=C1OC(c2ccc(O)c(S(=O)(=O)O)c2)(c2ccc(O)c(S(=O)(=O)O)c2)c2c(Br)c(Br)c(Br)c(Br)c21	24.6443	0	1.1968	-1.1968	FP	0.1953	YES
*	3331	OCCOc1ccc(C(=C(CCCl)c2ccccc2)c2ccccc2)cc1	17.4657	1	0.9052	0.0948	TP	2.0374	No
-	3590	CN1N=C2CCN(C(=O)C(COCc3ccccc3)NC(=O)C(C)(C)N)CC2(Cc2ccccc2)C1=O	2.90718	0	0.3137	-0.3137	TN	3.0635	No
*	3338	CC(C)(C)c1ccc(CN2CCN(C(c3ccccc3)c3ccc(Cl)cc3)CC2)cc1	17.838	1	0.9203	0.0797	TP	0.0479	YES
#	1727	CNC1C(OC2OC(CO)C(N)C(O)C2O)OC2CC(N)C(OC3C(N)CC(N)C(O)C3O)OC2C1O	4.4318	0	0.3756	-0.3756	TN	0.0747	YES
#	3348	Cc1nc2ccc(-n3ncc(C(=O)c4cc5ccccc5[nH]4)c3N)cc2[nH]1	18.2089	1	0.9353	0.0647	TP	0.0658	YES
-	3006	COc1cc(C)c(Sc2cnc(NC(=O)c3ccc(CNC(C)C(C)C)cc3)s2)cc1C(=O)N1CCN(C(C)=O)CC1	14.0748	0	0.7674	-0.7674	FP	2.0701	No
-	3356	Nc1nc(Nc2ccc3c(c2)CCC(N2CCCC2)CC3)nn1-c1cc2c(nn1)-c1ccccc1CCC2	12.8514	1	0.7177	0.2823	TP	3.071	No
+	1184	CCc1oc2ccccc2c1C(=O)c1cc(I)c(O)c(I)c1	5.28909	0	0.4104	-0.4104	TN	0.0527	YES
*	3359	CCCCCCCCCC(=O)OCCN1CCN(CCCN2c3ccccc3Sc3ccc(C(F)(F)F)cc32)CC1	24.7245	1	1.2001	-0.2001	TP	0.058	YES
+	2369	CC(=O)OC1CC2C3CCc4cc(OC(=O)c5ccccc5)ccc4C3CCC2(C)C1OC(C)=O	9.01768	0	0.5619	-0.5619	FP	0.0892	YES
*	3361	CC(C)(CNC(=O)c1cccc(-c2noc(C(F)(F)F)n2)c1)c1coc(-c2ccccc2)n1	24.7709	1	1.202	-0.202	TP	1.0716	YES
*	2920	O=C(O)C1=COC(OC2OC(CO)C(O)C(O)C2O)C2C(CO)=CCC12	-3.28004	0	0.0623	-0.0623	TN	0.0603	YES
+	3368	CC(C=CC1CC1(C)c1ccc2c(c1)C(C)(C)CCC2(C)C)=CC(=O)O	9.39275	1	0.5772	0.4228	TP	0.0342	YES
-	3703	COC(=O)c1ccc(C2c3[nH]c4ccccc4c3CC(C(=O)OC)N2C(=O)CCl)cc1	-3.36794	0	0.0587	-0.0587	TN	2.0569	No
#	3370	CC#CC(CC(=O)O)c1ccc(OCc2cccc(-c3ccc(C(F)(F)F)cc3)c2)cc1	19.4619	1	0.9863	0.0137	TP	0.0646	YES
-	2135	OC(CN1CCCCC1)c1cc(-c2ccccc2)on1	4.58197	0	0.3817	-0.3817	TN	1.034	YES
*	3381	Fc1ccc(-c2[nH]c(-c3ccccc3F)nc2-c2ccncc2)cc1	12.7123	1	0.712	0.288	TP	1.0359	YES
#	2064	O=C(O)CNC(=O)CNC(=O)CNC(=O)CSC(=O)c1ccccc1	-4.64466	0	0.0068	-0.0068	TN	0.0481	YES
*	3382	O=C(CCCN1CCC(n2c(=S)[nH]c3ccccc32)CC1)c1ccc(F)cc1	10.6047	1	0.6264	0.3736	TP	0.0444	YES
+	739	CNCCC(Oc1ccccc1C)c1ccccc1	7.27044	0	0.4909	-0.4909	TN	0.0195	YES
-	3384	Clc1cc2c(NC3CCCC3)nnc(-c3ccncc3)c2cc1Cl	13.3302	1	0.7371	0.2629	TP	4.0398	No
-	3066	O=C(Nc1ccc2[nH]nc(-c3ccncc3)c2c1)C1CCN(CC(=O)N2CCN(c3ccc(-c4ncccn4)cc3)CC2)C1	8.27202	0	0.5316	-0.5316	FP	1.0788	YES
+	3390	O=C(O)c1ccc(CCCc2ccc(OCCc3ccc(F)cc3)cc2)o1	2.92533	1	0.3144	0.6856	FN	2.0369	No
+	2381	Cc1cccc(N(C)C(=S)Oc2ccc3c(c2)C2CCC3C2)c1	1.88687	0	0.2722	-0.2722	TN	1.0413	YES
-	3398	CN1CCC(c2c(O)cc(O)c3c(=O)cc(-c4ccc(C(F)(F)F)cc4Cl)oc23)C1CO	10.4184	1	0.6188	0.3812	TP	1.0674	YES
*	1685	O=C(C=Cc1ccc(O)c(O)c1)OC1CC(O)(C(=O)O)CC(O)C1O	-0.65253	0	0.169	-0.169	TN	0.0436	YES
-	3411	O=C(Nc1ncc([N+](=O)[O-])s1)c1ccccc1O	9.75859	1	0.592	0.408	TP	1.033	YES
*	1722	C=CC1=C(C(=O)O)N2C(=O)C(NC(=O)C(=NO)c3csc(N)n3)C2SC1	-6.14276	0	-0.054	0.054	TN	3.083	No
*	3415	COc1cc(N2CCN(C)CC2)ccc1Nc1nccc(-c2cn(C)c3cnccc23)n1	18.936	1	0.9649	0.0351	TP	0.0642	YES
-	2614	O=C1C(CCC(O)c2ccc(F)cc2)C(c2ccc(O)cc2)N1c1ccc(F)cc1	11.14	0	0.6481	-0.6481	FP	0.0391	YES
*	3463	CCCCNc1ncc2c(-c3ccc(CN4CCN(C)CC4)cc3)cn(C3CCC(O)CC3)c2n1	17.2949	1	0.8982	0.1018	TP	0.0599	YES
+	1486	O=C(Nc1ccccc1)OCC(CN1CCCCC1)OC(=O)Nc1ccccc1	5.98559	0	0.4387	-0.4387	TN	0.0446	YES
*	3464	COc1ccc(C(C)(C)C)cc1CNC1C2CCN(CC2)C1C(c1ccccc1)c1ccccc1	25.7059	1	1.2399	-0.2399	TP	0.0444	YES
#	2175	NCCCCC(NC(=O)C1CCCN1C(=O)C1CSSCC(NC(=O)CNC(=O)CNC(=O)CN)C(=O)NC(Cc2ccc(O)cc2)C(=O)NC(Cc2ccccc2)C(=O)NC(CCC(N)=O)C(=O)NC(CC(N)=O)C(=O)N1)C(=O)NCC(N)=O	-8.22621	0	-0.1387	0.1387	TN	0.1333	YES
*	3469	O=C1Nc2nc(-c3c(O)cccc3OCC3CC3)cc(C3CCCNC3)c2CO1	20.5471	1	1.0303	-0.0303	TP	1.0567	YES
-	901	Cc1cc(SCc2sc(-c3ccc(C(F)(F)F)c(F)c3)nc2C)ccc1OCC(=O)O	4.00462	0	0.3582	-0.3582	TN	1.0663	YES
-	3475	CC(C)C(O)(c1ccc2cc(OC(F)F)c(OC(F)F)cc2c1)c1cn[nH]n1	8.06523	1	0.5232	0.4768	TP	0.0404	YES
+	1161	CN1CCN(C(=O)OC2c3nccnc3C(=O)N2c2ccc(Cl)cn2)CC1	-2.1929	0	0.1064	-0.1064	TN	0.0592	YES
-	3483	O=C1NNc2nc(CN3Cc4ccccc4C3)nc3cccc1c23	8.41596	1	0.5375	0.4625	TP	0.0574	YES
#	2766	CN(CC(=O)N(Cc1ccc(C2CCCCC2)cc1)c1ccc(C(=O)O)c(O)c1)S(=O)(=O)c1c(F)c(F)c(F)c(F)c1F	-4.80966	0	0.0001	-0.0001	TN	0.0791	YES
-	3508	CCCCCCCCCCCCCCCCOc1nc2ccc(C)cc2c(=O)o1	8.96757	1	0.5599	0.4401	TP	1.0357	YES
-	2623	O=C(O)c1ccccc1C(=O)Nc1ccc(-c2ccccc2)cc1	6.86009	0	0.4743	-0.4743	TN	0.0339	YES
*	3511	COCCNC(=O)Nc1ccc2nc(-c3cccs3)c(-c3cccs3)nc2c1	6.82842	1	0.473	0.527	FN	8.0466	No
*	1463	CCOC(=O)c1cccc(N)c1	0.78761	0	0.2275	-0.2275	TN	0.0166	YES
#	3514	CC1CN(CC(=O)N2CC(C)(C)c3ncc(Cc4ccc(F)cc4)cc32)C(CN2CCOCC2C)CN1	17.715	1	0.9153	0.0847	TP	0.0695	YES
#	1123	CN1C(=O)NC(=O)C(C)(C2=CCCCC2)C1=O	-2.98671	0	0.0742	-0.0742	TN	0.0425	YES
-	3525	CC1=C2CC3C(CCC4CC(NS(C)(=O)=O)CCC43C)C2CCC2(C1)OC1CC(C)CNC1C2C	16.9452	1	0.884	0.116	TP	2.064	No
-	2679	CC#CC1(O)CCC2C3CC(C)C4=CC(=O)CCC4(C)C3CCC21C	7.51174	0	0.5007	-0.5007	FP	0.0577	YES
+	3530	CCCCCCC(C)(C)c1cc(O)c2c(c1)OC(C)(C)C1CC=C(CO)CC21	16.7704	1	0.8769	0.1231	TP	0.0363	YES
-	1628	CC1CCCCN1CCCOC(=O)c1ccccc1	5.15876	0	0.4051	-0.4051	TN	0.0257	YES
*	3532	COc1ccccc1C(=O)Nc1cc2c(cc1N1CCCC1)n(C)c(=O)n2C	7.49563	1	0.5001	0.4999	TP	0.0532	YES
*	3167	CC1OC(OC2C(O)C(OCCc3ccc(O)c(O)c3)OC(CO)C2OC(=O)C=Cc2ccc(O)c(O)c2)C(O)C(O)C1O	-0.32087	0	0.1825	-0.1825	TN	0.0816	YES
+	3544	C=CC(=O)Nc1cccc(C)c1Nc1ncc2cc(-c3c(Cl)c(OC)cc(OC)c3Cl)ccc2n1	14.858	1	0.7992	0.2008	TP	3.0727	No
-	420	Cc1cc2c(cc1S(N)(=O)=O)S(=O)(=O)CCC2	2.90458	0	0.3136	-0.3136	TN	1.0526	YES
-	3567	Cc1cc(C)c(CNC(=O)c2cc(-c3ccc(N4CCN(C)CC4)nc3)cc3c2c(C)cn3C(C)C)c(=O)[nH]1	10.1788	1	0.6091	0.3909	TP	1.0536	YES
*	2607	NC(CSCC(=O)O)C(=O)O	-7.56338	0	-0.1117	0.1117	TN	0.0257	YES
*	3586	COc1nc(OCc2cccc(-c3ccccc3)c2C)ccc1CNCCNC(C)=O	20.4636	1	1.027	-0.027	TP	0.0433	YES
-	2603	CCOC(=O)C(CCc1ccccc1)NC(C)C(=O)N1Cc2cc(OC)c(OC)cc2CC1C(=O)O	7.82828	0	0.5136	-0.5136	FP	0.0524	YES
#	3591	Nc1nc(OC(c2ccc(-c3cccc(F)c3)cc2)C(F)(F)F)cc(-c2ccc(CC(N)C(=O)O)cc2)n1	15.1138	1	0.8096	0.1904	TP	0.0587	YES
-	2306	CCNC(=O)c1cc2c(-c3cc(OCCN4CCCC4)c(Cl)cc3Cl)nc(N)nc2s1	1.13036	0	0.2415	-0.2415	TN	3.0683	No
#	3593	CCOC(=O)NC1CCC2C(C1)CC1C(=O)OC(C)C1C2C=Cc1ccc(-c2cccc(F)c2)cn1	24.4928	1	1.1907	-0.1907	TP	0.0593	YES
*	3265	CN1C(=O)CC(C(=O)NC(Cc2cnc[nH]2)C(=O)N2CCCC2C(N)=O)NC1=O	-12.8665	0	-0.3272	0.3272	TN	0.0541	YES
+	3607	COCCNCc1ccc(-c2cc3nccc(Oc4ccc(NC(=S)NC(=O)Cc5ccc(F)cc5)cc4F)c3s2)nc1	26.7159	1	1.281	-0.281	TP	7.0968	No
*	2743	CC(C)CNc1ccnc(NCc2csc(-c3ccccc3)n2)n1	0.26437	0	0.2063	-0.2063	TN	0.0497	YES
*	3619	CC12CCC3c4ccc(OC(=O)N(CCCl)CCCl)cc4CCC3C1CCC2OP(=O)(O)O	-10.8549	1	-0.2455	1.2455	FN	4.0762	No
-	3034	O=C(CC12CC3CC(CC(C3)C1)C2)Nc1cccc2nc(NCCNCCO)ccc12	8.53098	0	0.5421	-0.5421	FP	0.0462	YES
+	3638	CCC(NC(=O)C(CS(=O)(=O)CC1CC1)NC(c1ccc(F)cc1)C(F)(F)F)C(=O)C(=O)NC1CC1	9.10987	1	0.5657	0.4343	TP	0.0675	YES
*	3000	CC(C)CC(N)C(O)C(=O)NC(C(=O)NC(C(=O)NC(CC(=O)O)C(=O)O)C(C)C)C(C)C	-10.536	0	-0.2325	0.2325	TN	0.0384	YES
#	3644	COc1ccc2c(c1)C1(CC1c1ccc3c(C=Cc4ccc(CN5CC(C)OC(C)C5)cc4)[nH]nc3c1)C(=O)N2	15.9718	1	0.8445	0.1555	TP	0.0756	YES
*	1737	NC(CC(=O)N1CCn2c(nnc2C(F)(F)F)C1)Cc1cc(F)c(F)cc1F	5.43597	0	0.4164	-0.4164	TN	2.0584	No
-	3653	Cn1ncc2cc(-c3cnc(N)c(Cl)c3N3CCC4(CCNC4=O)CC3)ccc21	10.9777	1	0.6416	0.3584	TP	0.0592	YES
*	1530	CC(C)CC(NC(=O)C(Cc1c[nH]c2ccccc12)NC(=O)C(Cc1ccc(O)cc1)NC(=O)C(CO)NC(=O)C(Cc1c[nH]c2ccccc12)NC(=O)C(Cc1cnc[nH]1)NC(=O)C1CCC(=O)N1)C(=O)NC(CCCNC(=N)N)C(=O)N1CCCC1C(=O)NCC(N)=O	-13.1656	0	-0.3394	0.3394	TN	0.1404	YES
*	3685	CC(C)CC1C(=O)OC(Cc2ccc(N3CCOCC3)cc2)C(=O)N(C)C(CC(C)C)C(=O)OC(C)C(=O)N(C)C(CC(C)C)C(=O)OC(Cc2ccc(N3CCOCC3)cc2)C(=O)N(C)C(CC(C)C)C(=O)OC(C)C(=O)N1C	4.38363	1	0.3736	0.6264	FN	0.1164	YES
*	3330	CCCc1ccc(OCC(=O)N(Cc2nc(-c3cccnc3)no2)C(C)C)cc1	1.30805	0	0.2487	-0.2487	TN	0.0432	YES
+	3708	COc1cc(N2CCN(C)CC2)ccc1Nc1ncc2c(n1)N(C)c1ccccc1C(=O)N2	11.7531	1	0.6731	0.3269	TP	0.0651	YES
#	3366	Cc1ccccc1CN1C(=O)C2=C(CCN(Cc3ccccc3)C2)N2CCN=C12	2.30686	0	0.2893	-0.2893	TN	0.0622	YES
-	3714	CC(C)(O)CNc1ncc(-c2ccnc(Nc3ccncc3)n2)c(CC2CC2)n1	9.45567	1	0.5797	0.4203	TP	0.0614	YES
*	2602	CC(CN1CC(=O)NC(=O)C1)N1CC(=O)NC(=O)C1	-3.73026	0	0.044	-0.044	TN	0.0354	YES
-	3721	CC1(C)C(=O)N(c2ccc(C#N)c(C(F)(F)F)c2)C(=S)N1Cc1ccc(-c2cn[nH]n2)cc1	11.417	1	0.6594	0.3406	TP	0.0797	YES
#	3058	OCC(O)C(O)C(O)CO	-3.50738	0	0.053	-0.053	TN	0.007	YES
+	3725	CCc1ccc(N(CC(C)C)S(=O)(=O)c2ccc(OCC3CCOCC3)c(CO)c2)cc1	12.3829	1	0.6986	0.3014	TP	0.0621	YES
*	1967	CCCCCCCN(CC)CCCC(O)c1ccc(NS(C)(=O)=O)cc1	3.51986	0	0.3386	-0.3386	TN	0.0317	YES
#	3732	c1ccc2c(-c3cnn4cc(-c5ccc(OCCN6CCOCC6)cc5)cnc34)ccnc2c1	9.86206	1	0.5962	0.4038	TP	0.0919	YES
#	1279	Cc1[nH]c(=O)c(C#N)cc1-c1ccc2nccn2c1	-5.62622	0	-0.033	0.033	TN	0.0535	YES
#	3739	CCCCCCCC(=O)NC(CN1CCCC1)C(O)c1ccc2c(c1)OCCO2	14.4566	1	0.7829	0.2171	TP	0.0432	YES
#	3733	CC1(C(=O)N(CCCC(=O)O)Cc2cccc(Cl)c2)CCN1C(=O)c1csc2ccccc12	-5.96159	0	-0.0467	0.0467	TN	0.0574	YES
-	3742	C=CC(=O)NC1CCOCC1Nc1ncc2cc(-c3c(Cl)c(OC)cc(OC)c3Cl)ccc2n1	16.5345	1	0.8673	0.1327	TP	3.0696	No
*	1842	NCC1OC(OC2C(CO)OC(OC3C(O)C(N)CC(N)C3OC3OC(CN)C(O)C(O)C3N)C2O)C(N)C(O)C1O	3.98644	0	0.3575	-0.3575	TN	0.0849	YES
#	3747	Cn1cc(-c2ccc(-c3cncc(Cl)c3N3CCC4(CCNC4=O)CC3)cc2)cn1	17.158	1	0.8927	0.1073	TP	0.0614	YES
-	401	O=C(CCCN1CC=C(n2c(=O)[nH]c3ccccc32)CC1)c1ccc(F)cc1	5.7325	0	0.4284	-0.4284	TN	0.0411	YES
+	3755	CONC(=O)Nc1ccc(-c2sc3c(c2CN(C)Cc2ccccc2)c(=O)n(-c2ccccc2)c(=O)n3Cc2c(F)cccc2F)cc1	27.3683	1	1.3075	-0.3075	TP	5.0812	No
*	1929	O=C(NNCS(=O)(=O)O)c1ccncc1	-2.96404	0	0.0751	-0.0751	TN	0.0352	YES
+	3759	c1ccc(-c2cc(CCC3CCNCC3)c3ccccc3n2)cc1	11.2796	1	0.6538	0.3462	TP	0.0362	YES
+	2374	CCCc1ccc(OCC(=O)N2CCN(C(=O)COc3ccc(CCC)cc3OC)CC2)c(OC)c1	6.80714	0	0.4721	-0.4721	TN	0.0543	YES
-	3776	COc1cc(C(=O)NC(=N)Nc2ccc(C)c(NC(=O)c3ccc(-c4ccccc4)cc3)c2)cc(OC)c1OC	14.388	1	0.7801	0.2199	TP	1.08	YES
-	220	NCC(O)c1ccc(O)cc1	-0.4023	0	0.1792	-0.1792	TN	0.0106	YES
+	3779	CC(C(=O)Nc1ccc(Cl)cc1)C1CCC(c2ccnc3ccc(F)cc23)CC1	7.69502	1	0.5082	0.4918	TP	0.0487	YES
+	202	COc1ccc(OC)c(C(O)C(C)N)c1	0.65955	0	0.2223	-0.2223	TN	0.0171	YES
#	3794	Cc1cc2cc(Oc3ccnc(Nc4cccc(CS(=O)(=O)NCCN(C)C)c4)n3)ccc2[nH]1	18.803	1	0.9595	0.0405	TP	0.0709	YES
*	3407	CC12C=CC(=O)C=C1CCC1C2C(O)CC2(C)C1CCC2(O)C(=O)COP(=O)(O)O	-4.57668	0	0.0096	-0.0096	TN	0.0583	YES
*	3795	O=C(C=Cc1ccc(Cl)cc1)N1CCC2(CC1)CN(Cc1ccc(Cl)c(Cl)c1)C(=O)O2	9.58703	1	0.5851	0.4149	TP	0.0748	YES
#	1836	CN(C)CCn1nnnc1SCC1=C(C(=O)O)N2C(=O)C(NC(=O)Cc3csc(N)n3)C2SC1	-7.60371	0	-0.1134	0.1134	TN	0.1097	YES
+	3806	Cc1cc(OC(CCC(F)(F)F)c2ccc(C(=O)NCCC(=O)O)cc2)cc(C)c1-c1ccc(C(C)(C)C)cc1	9.60425	1	0.5858	0.4142	TP	0.0584	YES
+	1149	C=CCC1(O)CCC2C3CCC4=CCCCC4C3CCC21C	5.00078	0	0.3987	-0.3987	TN	0.0384	YES
#	3809	CCNCCc1ccc(CN(CC)c2cc(OC)ccc2C2CCc3cc(O)ccc3C2)cc1	13.9251	1	0.7613	0.2387	TP	0.0464	YES
*	285	O=C1CCC(N2C(=O)c3ccccc3C2=O)C(=O)N1	-3.58592	0	0.0499	-0.0499	TN	0.0369	YES
+	3823	CC1CC(N)CC(c2ccncc2NC(=O)c2ccc(F)c(-c3c(F)cccc3F)n2)C1	9.87323	1	0.5967	0.4033	TP	1.0436	YES
*	19	O=C(O)C1CCCN1	-0.80039	0	0.163	-0.163	TN	0.0117	YES
+	3840	CC1=C(c2ccc(O)cc2)C(c2ccc(OCCN3CCCCC3)cc2)Oc2cc(O)ccc21	14.88	1	0.8001	0.1999	TP	0.0495	YES
-	1145	CCN(CCO)CCCC(C)Nc1ccnc2cc(Cl)ccc12	6.35545	0	0.4538	-0.4538	TN	0.0324	YES
-	3841	CCN(CC)CCNc1ccc(C)c2sc3ccccc3c(=O)c12	10.4687	1	0.6209	0.3791	TP	1.0362	YES
*	1017	O=C(NC(Cc1cc(=O)[nH]c2ccccc12)C(=O)O)c1ccc(Cl)cc1	-4.18778	0	0.0254	-0.0254	TN	0.0424	YES
*	3848	CC(C)(O)C1CCC(Nc2ccc3ncc(-c4cccc(C(F)(F)F)c4)n3n2)CC1	20.2928	1	1.02	-0.02	TP	1.057	YES
#	2377	CCN(CC)CC(=O)Nc1c(C)cccc1C(=O)OC	-0.37107	0	0.1805	-0.1805	TN	0.0231	YES
+	3913	Cc1cc(O)ccc1C(C)(C)C	5.6568	1	0.4254	0.5746	FN	0.0124	YES
-	2244	O=C1CCCC2=C1C(c1[nH]ncc1Cl)N=C(Nc1nc3ccccc3o1)N2	-0.22509	0	0.1864	-0.1864	TN	2.0628	No
+	3951	Cc1ccc(NCCN(C)CCNc2ccnc3cc(Cl)ccc23)c2c(=O)c3ccccc3sc12	15.1269	1	0.8101	0.1899	TP	3.0584	No
#	3920	CN(C)CC(=O)O	-2.2075	0	0.1059	-0.1059	TN	0.0071	YES
-	3953	CCCCOCCOc1ccc(-c2ccc3c(c2)/C=C(/C(=O)Nc2ccc(S(=O)Cc4cncn4CCC)cc2)CCCN3CC(C)C)cc1	10.3983	1	0.618	0.382	TP	0.0904	YES
-	1953	CC(C=CC1=C(C)CCCC1(C)C)=CC=CC(C)=CC(=O)Oc1c(C)c(C)c2c(c1C)CCC(C)(CCCC(C)CCCC(C)CCCC(C)C)O2	17.4739	0	0.9055	-0.9055	FP	0.0661	YES
-	3954	N#CC1(c2ccc3c(N)ncnn23)OC(CO)C(O)C1O	4.44859	1	0.3763	0.6237	FN	0.0622	YES
#	31	CC(C)(O)C=CC(=O)C(C)(O)C1C(O)CC2(C)C3CC=C4C(C=C(O)C(=O)C4(C)C)C3(C)C(=O)CC12C	0.19315	0	0.2034	-0.2034	TN	0.0643	YES
-	3956	CCC(CC)COC(=O)C(C)NP(=O)(OCC1OC(C#N)(c2ccc3c(N)ncnn23)C(O)C1O)Oc1ccccc1	8.0657	1	0.5232	0.4768	TP	0.1038	YES
#	3663	O=C(O)C1OC(O)C(O)C(O)C1O	-3.44707	0	0.0555	-0.0555	TN	0.0198	YES

## Sheet: Table S7
Set	ID	SMILES	DCW	Expr	Calc	Expr-Calc	Class	DefectSMILES	Applicability
#	6	CN1CCN(CCCN2c3ccccc3Sc3ccc(C(F)(F)F)cc32)CC1	16.3018	1	1.0179	-0.0179	TP	0.046	YES
#	1918	CCCCCC(O)C1C(=O)OC(C)C(O)C=CC=CC=CC=CC=C(C)C(O)C(O)C(O)CC(O)CC(O)CC(O)CC(O)CC1O	-8.00259	0	-0.2299	0.2299	TN	0.0465	YES
+	10	CN1C2CCC1CC(OC(c1ccccc1)c1ccccc1)C2	9.76596	1	0.6824	0.3176	TP	0.0209	YES
#	1067	CCC(C=CC(C)C1CCC2C3CC=C4CC(O)CCC4(C)C3CCC12C)C(C)C	-2.11642	0	0.0723	-0.0723	TN	0.0378	YES
*	13	CN(C)CCC=C1c2ccccc2Sc2ccc(Cl)cc21	11.8005	1	0.7868	0.2132	TP	0.0282	YES
#	168	COc1ccc2c(c1)c(CC(=O)O)c(C)n2C(=O)c1ccc(Cl)cc1	4.69318	0	0.4219	-0.4219	TN	0.0314	YES
#	15	c1cc(-c2sc(-c3ccncc3)c(-c3ccncc3)c2-c2ccncc2)ccn1	10.3251	1	0.7111	0.2889	TP	0.053	YES
-	359	NS(=O)(=O)c1cc2c(cc1Cl)NC(=CSCc1ccccc1)NS2(=O)=O	1.61274	0	0.2638	-0.2638	TN	1.0456	No
*	16	CN(C)CCC=C1c2ccccc2C=Cc2ccccc21	16.1867	1	1.012	-0.012	TP	0.0296	YES
#	204	CC(N)(Cc1ccc(O)cc1)C(=O)O	2.74721	0	0.322	-0.322	TN	0.0135	YES
*	20	CN(C)c1ccccc1CN1CCCN(Cc2ccccc2N(C)C)C1c1ccncc1	14.4088	1	0.9207	0.0793	TP	0.0239	YES
*	1755	CCC(CO)NCCNC(CC)CO	6.24064	0	0.5014	-0.5014	FP	0.0075	YES
#	21	CN1CCC(CN2c3ccccc3Sc3ccccc32)C1	15.3472	1	0.9689	0.0311	TP	0.0252	YES
-	251	CC(C)[N+](C)(CCOC(=O)C1c2ccccc2Oc2ccccc21)C(C)C	4.40217	0	0.407	-0.407	TN	0.0209	YES
*	22	CNCCC=C1c2ccccc2CCc2ccccc21	12.4768	1	0.8216	0.1784	TP	0.0232	YES
+	218	CC1(C)NC(=O)N(c2ccc([N+](=O)[O-])c(C(F)(F)F)c2)C1=O	-2.33016	0	0.0613	-0.0613	TN	0.0408	YES
#	25	O=C1CSC2(CCN(CCCN3c4ccccc4Sc4ccc(Cl)cc43)CC2)N1	17.2823	1	1.0683	-0.0683	TP	0.0445	YES
+	740	CN1CCN2c3ncccc3Cc3ccccc3C2C1	1.19854	0	0.2425	-0.2425	TN	0.0187	YES
*	34	Clc1ccc2c(c1)C(N1CCNCC1)=Nc1ccccc1O2	22.5849	1	1.3405	-0.3405	TP	0.0249	YES
#	1131	CC(c1cc2ccccc2s1)N(O)C(N)=O	-0.23003	0	0.1692	-0.1692	TN	0.0208	YES
*	56	CN(C)CCC=C1c2ccccc2CCc2ccccc21	14.2844	1	0.9144	0.0856	TP	0.0235	YES
+	1616	CNC1CCCN(c2c(F)cc3c(=O)c(C(=O)O)cn(C4CC4)c3c2OC)C1	6.79913	0	0.5301	-0.5301	FP	0.0419	YES
#	57	CCCCc1oc2ccccc2c1C(=O)c1cc(I)c(OCCN(CC)CC)c(I)c1	14.455	1	0.9231	0.0769	TP	0.0485	YES
*	577	COC(=O)CCC(=O)CN	-1.86064	0	0.0855	-0.0855	TN	0.0059	YES
-	72	CC(C)COCC(CN(Cc1ccccc1)c1ccccc1)N1CCCC1	13.5108	1	0.8746	0.1254	TP	0.0207	YES
+	525	CC(C=CC1=C(C)CCCC1(C)C)=CC=CC(C)=CCO	1.95524	0	0.2814	-0.2814	TN	0.0279	YES
*	99	CN1CCC(=C2c3ccccc3C=Cc3ccccc32)CC1	11.8091	1	0.7873	0.2127	TP	0.0315	YES
+	3659	CN1CCN(c2ccc(Nc3ncc4cc(C#N)c(=O)n(C5CCCC5)c4n3)cc2)CC1	0.36463	0	0.1997	-0.1997	TN	0.0798	YES
*	100	CN1CCN(C2=Nc3cc(Cl)ccc3Nc3ccccc32)CC1	13.856	1	0.8924	0.1076	TP	0.0339	YES
#	1237	CCOC(=O)c1ccc(O)cc1	1.23049	0	0.2442	-0.2442	TN	0.0071	YES
+	101	CCN(CC)CCCC(C)Nc1ccnc2cc(Cl)ccc12	10.9505	1	0.7432	0.2568	TP	0.0162	YES
+	3851	COc1ccc(Cl)cc1-c1cc(=O)[nH]c(=S)n1CC(N)=O	-3.69342	0	-0.0086	0.0086	TN	1.0364	No
#	104	CN(C)CCCN1c2ccccc2CCc2ccc(Cl)cc21	11.987	1	0.7964	0.2036	TP	0.0225	YES
+	1706	COc1ccc(OC)c(C(O)CNC(=O)CN)c1	0.47824	0	0.2055	-0.2055	TN	0.0161	YES
*	106	CN(C)CCCN1c2ccccc2Sc2ccc(Cl)cc21	9.52108	1	0.6698	0.3302	TP	0.0234	YES
*	671	CN1C(=O)COc2c(C(=O)NC3CN4CCC3CC4)cc(Cl)cc21	0.39727	0	0.2014	-0.2014	TN	0.039	YES
-	116	CNCCCN1c2ccccc2CCc2ccccc21	10.1974	1	0.7045	0.2955	TP	0.0183	YES
+	3050	Cc1ccc2nc(NC(=O)CSc3nc4c(c(=O)n3-c3ccccc3)SCC4)sc2c1	1.51297	0	0.2587	-0.2587	TN	4.0554	No
-	121	CCN(CC)CCOC(=O)C1(C2CCCCC2)CCCCC1	7.23392	1	0.5524	0.4476	TP	0.0167	YES
-	673	CC(C)CC1C(=O)N2CCCC2C2(O)OC(NC(=O)C3C=C4c5cccc6[nH]c(Br)c(c56)CC4N(C)C3)(C(C)C)C(=O)N12	2.23443	0	0.2957	-0.2957	TN	0.0923	YES
#	129	O=c1c2ccccc2[se]n1-c1ccccc1	4.05464	1	0.3891	0.6109	FN	0.0145	YES
#	3661	Cn1c(-c2ccccc2C(F)(F)F)nnc1C12CCC(c3noc(C4CC(F)(F)C4)n3)(CC1)CC2	0.193	0	0.1909	-0.1909	TN	0.0852	YES
-	133	CNCCC(Oc1ccc(C(F)(F)F)cc1)c1ccccc1	8.28069	1	0.6061	0.3939	TP	0.0311	YES
#	1696	C[N+](C)(C)CCOP(=O)(O)OP(=O)(O)OCC1OC(n2ccc(N)nc2=O)C(O)C1O	-1.57386	0	0.1002	-0.1002	TN	0.0677	YES
#	152	O=C1Nc2ccc(I)cc2C1=Cc1cc(Br)c(O)c(Br)c1	10.059	1	0.6974	0.3026	TP	0.0788	YES
*	884	CC=CC=CC(=O)O	0.66197	0	0.215	-0.215	TN	0.0111	YES
#	166	O=S(=O)(c1cccc2c(I)cccc12)N1CCCNCC1	12.7587	1	0.836	0.164	TP	0.0389	YES
#	834	CCCCCCc1ccc(O)cc1O	5.18488	0	0.4472	-0.4472	TN	0.0095	YES
-	169	CN(C)CCCN1c2ccccc2CCc2ccccc21	12.005	1	0.7973	0.2027	TP	0.0187	YES
-	1679	C#CC1(O)CCC2C3CCC4=CC(=O)CCC4C3C(=C)CC21CC	7.17688	0	0.5494	-0.5494	FP	1.0374	No
+	177	CCCc1c(OCCCOc2ccc(OCC(=O)O)cc2)ccc(C(C)=O)c1O	3.91568	1	0.382	0.618	FN	0.0238	YES
-	2489	CNC1CCC(N(Cc2cccc(-c3ccncc3)c2)C(=O)c2sc3c(F)ccc(F)c3c2Cl)CC1	7.00037	0	0.5404	-0.5404	FP	0.0691	YES
-	181	CN(C)C(=O)C(CCN1CCC(O)(c2ccc(Cl)cc2)CC1)(c1ccccc1)c1ccccc1	7.58042	1	0.5702	0.4298	TP	0.0308	YES
-	3144	Cn1cc(-c2cnc3ccc4ccc(CS(=O)(=O)NCc5ccccn5)cc4c(=O)c3c2)cn1	3.06462	0	0.3383	-0.3383	TN	0.0802	YES
+	185	CCOC(=O)N1CCC(=C2c3ccc(Cl)cc3CCc3cccnc32)CC1	9.90514	1	0.6895	0.3105	TP	0.0401	YES
+	2237	CC1CCN(C(=O)CC#N)CC1N(C)c1ncnc2[nH]ccc12	1.93667	0	0.2804	-0.2804	TN	0.0306	YES
*	208	CNCCCC12CCC(c3ccccc31)c1ccccc12	7.71832	1	0.5772	0.4228	TP	0.0188	YES
#	3337	O=C1C2C3CCC(C3)C2C(=O)N1CC1CCCCC1CN1CCN(c2nsc3ccccc23)CC1	4.06215	0	0.3895	-0.3895	TN	0.057	YES
+	212	COc1ccccc1N1CCN(CC(O)COc2cccc3ccccc23)CC1	8.28879	1	0.6065	0.3935	TP	0.0279	YES
#	2746	Cn1cnc(N)c2ncnc1-2	-6.347	0	-0.1449	0.1449	TN	0.0213	YES
*	216	COC(=O)C1=C(C)NC(C)=C(C(=O)OCCN(C)Cc2ccccc2)C1c1cccc([N+](=O)[O-])c1	2.39712	1	0.3041	0.6959	FN	0.0355	YES
-	3860	CCN1C(=O)N2Cc3cc(OC)cc(OC)c3C(C)C=C2C12CCN(Cc1cc(C)cc(C)c1)CC2	2.20234	0	0.294	-0.294	TN	1.043	No
#	222	CCN(CC)CC#CCOC(=O)C(O)(c1ccccc1)C1CCCCC1	4.08962	1	0.3909	0.6091	FN	0.0259	YES
*	1856	O=c1[nH]c(=O)n(C2CC(O)C(CO)O2)cc1I	-1.98724	0	0.079	-0.079	TN	2.033	No
#	223	Cc1ccccc1C(OCCN(C)C)c1ccccc1	8.63593	1	0.6244	0.3756	TP	0.012	YES
*	1396	CC1CCC2C(C)C(OC(=O)CCC(=O)O)OC3OC4(C)CCC1C32OO4	4.00039	0	0.3864	-0.3864	TN	1.0421	No
+	224	O=c1[nH]c2ccccc2n1CCCN1CCN(C(c2ccccc2)c2ccccc2)CC1	12.8311	1	0.8397	0.1603	TP	0.0307	YES
+	3006	COc1cc(C)c(Sc2cnc(NC(=O)c3ccc(CNC(C)C(C)C)cc3)s2)cc1C(=O)N1CCN(C(C)=O)CC1	11.8746	0	0.7906	-0.7906	FP	1.0557	No
*	233	CC(CN1c2ccccc2Sc2ccccc21)N(C)C	7.59882	1	0.5711	0.4289	TP	0.0199	YES
+	1592	CC(=O)OCC(=O)NCCCOc1cccc(CN2CCCCC2)c1	4.07478	0	0.3902	-0.3902	TN	0.0222	YES
+	235	CCCNCC(O)COc1ccccc1C(=O)CCc1ccccc1	2.58066	1	0.3135	0.6865	FN	0.0198	YES
*	3392	CCOC(=O)C(C)CC(Cc1ccc(-c2ccccc2)cc1)NC(=O)CCC(=O)O	6.46132	0	0.5127	-0.5127	FP	0.0259	YES
#	239	OCCN1CCN(CCCN2c3ccccc3Sc3ccc(Cl)cc32)CC1	16.1765	1	1.0115	-0.0115	TP	0.0318	YES
#	3093	Nc1ncnc2c1C(=O)N(c1ccc(C3CCC(CC(=O)O)CC3)cc1)CCO2	-2.80813	0	0.0368	-0.0368	TN	0.0322	YES
#	240	CN(C)CCCN1c2ccccc2Sc2ccccc21	9.53906	1	0.6707	0.3293	TP	0.0195	YES
+	925	O=[N+]([O-])c1ccc(-c2nc(-c3ccncc3)c(-c3ccc(F)cc3)[nH]2)cc1	12.9084	0	0.8437	-0.8437	FP	0.0367	YES
#	246	CCC(=O)c1ccc2c(c1)N(CCCN(C)C)c1ccccc1S2	12.8817	1	0.8423	0.1577	TP	0.0213	YES
#	841	Nc1ccccc1	3.1519	0	0.3428	-0.3428	TN	0.0032	YES
#	250	CNCCCC1c2ccccc2C=Cc2ccccc21	13.1554	1	0.8564	0.1436	TP	0.0239	YES
-	1886	Clc1cccc(C(c2ccc3nc[nH]c3c2)n2ccnc2)c1	3.47498	0	0.3594	-0.3594	TN	0.0216	YES
*	252	CN1CCN(CCCN2c3ccccc3Sc3ccc(Cl)cc32)CC1	16.4509	1	1.0256	-0.0256	TP	0.0311	YES
*	1820	CC(=O)Nc1c(I)c(C(=O)NC2C(O)OC(CO)C(O)C2O)c(I)c(N(C)C(C)=O)c1I	-1.72421	0	0.0925	-0.0925	TN	2.0686	No
#	262	COC(=O)C1C2CC3c4[nH]c5cc(OC)ccc5c4CCN3CC2CC(OC(=O)c2cc(OC)c(OC)c(OC)c2)C1OC	17.1165	1	1.0598	-0.0598	TP	0.0827	YES
#	897	CCN1CCCC1CNC(=O)c1cc(S(=O)(=O)CC)c(N)cc1OC	-1.9854	0	0.079	-0.079	TN	0.0265	YES
-	263	O=C(c1ccc(OCCN2CCCCC2)cc1)c1c(-c2ccc(O)cc2)sc2cc(O)ccc12	11.6498	1	0.7791	0.2209	TP	0.0375	YES
+	388	CN1CCN(C(c2ccccc2)c2ccccc2)CC1	5.23716	0	0.4499	-0.4499	TN	0.0157	YES
*	278	Oc1ccc(-c2nc(-c3ccncc3)c(-c3ccc(F)cc3)[nH]2)cc1	13.0997	1	0.8535	0.1465	TP	0.0376	YES
#	803	O=C(O)C=CC(=O)O	-5.81058	0	-0.1173	0.1173	TN	0.0105	YES
*	279	O=C(CCCN1CCC2(CC1)C(=O)NCN2c1ccccc1)c1ccc(F)cc1	6.32564	1	0.5057	0.4943	TP	0.0283	YES
+	389	COc1ccc2c(c1)[nH]c1c(C)nccc12	6.26748	0	0.5028	-0.5028	FP	0.0201	YES
#	288	CN1CCN(CCC=C2c3ccccc3Sc3ccc(S(=O)(=O)N(C)C)cc32)CC1	15.7687	1	0.9906	0.0094	TP	0.0464	YES
+	446	CCCCOc1cc(C(=O)OCCN(CC)CC)ccc1N	6.69554	0	0.5247	-0.5247	FP	0.0193	YES
#	291	OC(CCN1CCCCC1)(c1ccccc1)C1CCCCC1	9.83852	1	0.6861	0.3139	TP	0.0189	YES
-	3858	Nc1nccc(-c2c(-c3ccc(F)cc3)ncn2C2CCN(Cc3ccon3)CC2)n1	5.11023	0	0.4433	-0.4433	TN	0.0521	YES
#	294	CN(C)CCCN1c2ccccc2Sc2ccc(C(F)(F)F)cc21	9.37193	1	0.6621	0.3379	TP	0.0382	YES
-	3216	Cc1nc(N(C)C(=O)Cc2ccc(-c3ccccn3)cc2)sc1S(N)(=O)=O	3.74853	0	0.3734	-0.3734	TN	0.048	YES
#	295	CC(CN(C)C)CN1c2ccccc2CCc2ccccc21	14.2383	1	0.912	0.088	TP	0.0196	YES
*	491	COc1ccc2nc(S(=O)Cc3ncc(C)c(OC)c3C)[nH]c2c1	-1.24816	0	0.1169	-0.1169	TN	0.0301	YES
+	297	Nc1nc(N)c2nc(-c3ccccc3)c(N)nc2n1	6.18805	1	0.4987	0.5013	FN	0.0247	YES
*	259	Nc1nc2ccc(OC(F)(F)F)cc2s1	2.27124	0	0.2976	-0.2976	TN	0.0343	YES
-	355	CCCCOc1cc(C(=O)NCCN(CC)CC)c2ccccc2n1	6.5061	1	0.515	0.485	TP	0.0193	YES
#	440	CN(C(=O)C(Cl)Cl)c1ccc(OC(=O)c2ccco2)cc1	-1.3405	0	0.1122	-0.1122	TN	0.0234	YES
+	372	CN(C(=O)CN(CCO)CC(=O)N(C)C(C)(C)Cc1ccccc1)C(C)(C)Cc1ccccc1	5.74238	1	0.4758	0.5242	FN	0.0282	YES
+	3310	O=C(OC1C[N+]2(CCCOc3ccccc3)CCC1CC2)C(O)(c1cccs1)c1cccs1	-1.89492	0	0.0837	-0.0837	TN	0.0491	YES
+	380	CN(C)CCCOc1nn(Cc2ccccc2)c2ccccc12	7.13385	1	0.5472	0.4528	TP	0.0252	YES
+	1276	C=CCN1CCC23CCCCC2C1Cc1ccc(O)cc13	0.10995	0	0.1866	-0.1866	TN	1.0249	No
*	417	CN(C)CCC=C1c2ccccc2CSc2ccccc21	10.295	1	0.7095	0.2905	TP	0.0263	YES
+	2008	C=C1CC(=CC=C2CCCC3(C)C2CCC3C(C)C=CC(C)C(C)C)C(O)CC1O	13.4772	0	0.8729	-0.8729	FP	0.0436	YES
*	427	CC(C)N=c1cc2n(-c3ccc(Cl)cc3)c3ccccc3nc-2cc1Nc1ccc(Cl)cc1	14.0605	1	0.9029	0.0971	TP	0.0514	YES
#	3439	CCOC(=O)C(N)Cc1ccc(-c2cc(OC(c3ccc(Cl)cc3-n3ccc(C)n3)C(F)(F)F)nc(N)n2)cc1	7.42982	0	0.5624	-0.5624	FP	0.066	YES
+	434	CCCCc1cc2ccccc2c(OCCN(C)C)n1	8.24868	1	0.6045	0.3955	TP	0.0139	YES
*	80	O=NN(CCCl)C(=O)NCCCl	0.11729	0	0.187	-0.187	TN	0.0154	YES
#	435	CCN(CC)CCNc1ccc(CO)c2sc3ccccc3c(=O)c12	8.45799	1	0.6152	0.3848	TP	0.0344	YES
-	1422	CC(=O)OC1Cc2ccccc2N(C(N)=O)c2ccccc21	8.14628	0	0.5992	-0.5992	FP	0.0204	YES
+	438	CC(=O)c1ccc2c(c1)N(CCCN(C)C)c1ccccc1S2	12.3805	1	0.8166	0.1834	TP	0.0209	YES
*	639	CC(=O)OC1CC2CCC3C(CCC4(C)C3CC([N+]3(C)CCCCC3)C4OC(C)=O)C2(C)CC1[N+]1(C)CCCCC1	-3.66736	0	-0.0073	0.0073	TN	0.0413	YES
+	442	CC(=O)c1ccc2c(c1)N(CCCN1CCC(CCO)CC1)c1ccccc1S2	13.7811	1	0.8885	0.1115	TP	0.026	YES
-	548	CC=C(C(=CC)c1ccc(O)cc1)c1ccc(O)cc1	6.68836	0	0.5244	-0.5244	FP	0.0188	YES
*	452	CN1CCCC1CCOC(C)(c1ccccc1)c1ccc(Cl)cc1	10.0791	1	0.6985	0.3015	TP	0.0208	YES
+	1579	CCOc1nc2cccc(C(=O)O)c2n1Cc1ccc(-c2ccccc2-c2nn[nH]n2)cc1	1.1897	0	0.2421	-0.2421	TN	0.043	YES
*	508	CCN(CC)Cc1cc(Nc2ccnc3cc(Cl)ccc23)ccc1O	11.2775	1	0.76	0.24	TP	0.0277	YES
-	2900	Cc1cnc(CNC(=O)c2c(=O)c3ccc(N4CCCN(C)CC4)nc3n3c2sc2ccccc23)cn1	1.76787	0	0.2717	-0.2717	TN	0.0552	YES
+	510	COc1cc(C=CC(=O)C=C(O)C=Cc2ccc(O)c(OC)c2)ccc1O	0.75951	1	0.22	0.78	FN	0.0368	YES
-	3449	COc1cc(O)c(CC=C(C)C)c2c1C(=O)CC(c1ccc(O)cc1)O2	3.55422	0	0.3635	-0.3635	TN	0.0323	YES
#	532	COc1cc2c3cc1Oc1c(OC)c(OC)cc4c1C(Cc1ccc(O)c(c1)Oc1ccc(cc1)CC3N(C)CC2)N(C)CC4	14.2999	1	0.9152	0.0848	TP	0.0529	YES
*	3318	O=C(NN=Cc1ccc(O)c(O)c1)c1cc2ccccc2cc1O	3.95735	0	0.3842	-0.3842	TN	0.026	YES
*	533	COc1ccc2cc1Oc1ccc(cc1)CC1c3cc(c(OC)cc3CCN1C)Oc1c(OC)c(OC)cc3c1C(C2)N(C)CC3	19.0164	1	1.1573	-0.1573	TP	2.0508	No
*	414	Cc1cc(NS(=O)(=O)c2ccc(N)cc2)no1	-9.59842	0	-0.3118	0.3118	TN	0.0293	YES
*	538	Fc1ccc(C(c2ccc(F)cc2)N2CCN(CC=Cc3ccccc3)CC2)cc1	11.6718	1	0.7802	0.2198	TP	2.0338	No
-	2510	COc1ccc(CC2SC(=O)NC2=O)cc1C(=O)NCc1ccc(C(F)(F)F)cc1	6.85503	0	0.5329	-0.5329	FP	0.049	YES
-	550	COc1cc2nc(N3CCN(C(=O)C4COc5ccccc5O4)CC3)nc(N)c2cc1OC	10.4323	1	0.7166	0.2834	TP	0.068	YES
-	2480	CCCC(=O)OC1(C(=O)CC)CCC2C3CCC4=CC(=O)CCC4(C)C3C(O)CC21C	2.18036	0	0.2929	-0.2929	TN	1.0337	No
+	582	C1CCC(C(CC2CCCCN2)C2CCCCC2)CC1	7.36326	1	0.559	0.441	TP	0.0208	YES
#	2626	CC1C=CC=CCCC=CC=CC=CC=CC(OC2OC(C)C(O)C(N)C2O)CC2OC(O)(CC(O)C(O)CCC(O)CC(O)CC(O)CC(=O)OC(C)C(C)C1O)CC(O)C2C(=O)O	-0.40318	0	0.1603	-0.1603	TN	0.1006	YES
+	584	CN1CCCN(C(c2ccccc2)c2ccc(Cl)cc2)CC1	5.72038	1	0.4747	0.5253	FN	0.0199	YES
#	1435	Nc1nc(N)c(N=O)c(OCC2CCCCC2)n1	-2.7901	0	0.0377	-0.0377	TN	0.0256	YES
*	592	CCN(CCCc1ccccc1)CCCc1ccccc1	11.173	1	0.7546	0.2454	TP	0.013	YES
+	2039	O=S(=O)(O)Oc1ccc(C(c2ccc(OS(=O)(=O)O)cc2)c2ccccn2)cc1	3.8531	0	0.3788	-0.3788	TN	3.0369	No
#	596	CN1CCN(C2=Nc3ccccc3Oc3ccc(Cl)cc32)CC1	18.991	1	1.156	-0.156	TP	0.0366	YES
*	1208	CC1CN(c2c(F)c(F)c3c(=O)c(C(=O)O)cn(C4CC4)c3c2F)CC(C)N1	-1.45412	0	0.1063	-0.1063	TN	0.0496	YES
+	597	O=C(c1ccc(F)cc1)C1CCN(CCn2c(=O)[nH]c3ccccc3c2=O)CC1	10.1641	1	0.7028	0.2972	TP	2.0334	No
#	3130	CCOC(=O)c1ccnc(CNCC(=O)N(CC)CCN(C)C)c1	5.3696	0	0.4567	-0.4567	TN	0.0161	YES
+	605	CCCCCC(=O)OC1(C(C)=O)CCC2C3CCC4=CC(=O)CCC4(C)C3CCC21C	5.5901	1	0.468	0.532	FN	1.0337	No
-	3677	COc1cc2c3c(n(CCCN4CCOCC4)c(=O)c2cc1OC)-c1cc2c(cc1C3=O)OCO2	1.94552	0	0.2809	-0.2809	TN	2.0502	No
#	681	C=C1C(=O)OC2C1CCC(C)=CCCC1(C)OC21	9.92092	1	0.6903	0.3097	TP	0.0319	YES
#	3626	CNC(CC(C)C)C(=O)NC1C(=O)NC(CC(N)=O)C(=O)NC2C(=O)NC3C(=O)NC(C(=O)NC(C(=O)O)c4cc(O)cc(O)c4-c4cc3ccc4O)C(OC3CC(C)(N)C(O)C(C)O3)c3ccc(c(Cl)c3)Oc3cc2cc(c3OC2OC(CO)C(O)C(O)C2OC2CC(C)(NCc3ccc(-c4ccc(Cl)cc4)cc3)C(O)C(C)O2)Oc2ccc(cc2Cl)C1O	13.3922	0	0.8685	-0.8685	FP	0.1833	YES
+	687	CNCCCCOc1ccccc1Cc1ccccc1	5.07056	1	0.4413	0.5587	FN	0.0152	YES
-	2788	CCNC(=O)Nc1ccc(Oc2ncnc(N)c2C=NOC)cc1Cl	4.03307	0	0.388	-0.388	TN	0.0394	YES
#	693	CCC(=C(c1ccccc1)c1ccc(OCCN(C)C)cc1)c1ccccc1	15.0872	1	0.9556	0.0444	TP	0.0199	YES
#	3012	NS(=O)(=O)c1ccc(Nc2nc(OCC3CCCCC3)c3[nH]cnc3n2)cc1	9.16758	0	0.6517	-0.6517	FP	0.0401	YES
#	695	Clc1ccc2c(c1)N=C(N1CCNCC1)c1ccccc1N2	9.82981	1	0.6857	0.3143	TP	0.0364	YES
-	2834	Cc1c(N)nc(C(CC(N)=O)NCC(N)C(N)=O)nc1C(=O)NC(C(=O)NC(C)C(O)C(C)C(=O)NC(C(=O)NCCc1nc(-c2nc(C(=O)NCCC[S+](C)C)cs2)cs1)C(C)O)C(OC1OC(CO)C(O)C(O)C1OC1OC(CO)C(O)C(OC(N)=O)C1O)c1cnc[nH]1	0.992	0	0.2319	-0.2319	TN	0.1264	YES
+	776	CCC(=C(CC)c1ccc(O)cc1)c1ccc(O)cc1	7.03	1	0.5419	0.4581	TP	0.0154	YES
*	929	NC(=O)CCC(N)C(=O)O	-2.15971	0	0.0701	-0.0701	TN	0.0076	YES
*	778	CCC1OC(=O)C(C)C(OC2CC(C)(OC)C(O)C(C)O2)C(C)C(OC2OC(C)CC(N(C)C)C2O)C(C)(O)CC(C)CN(C)C(C)C(O)C1(C)O	6.58497	1	0.5191	0.4809	TP	0.0686	YES
#	1988	O=P(O)(O)C(Sc1ccc(Cl)cc1)P(=O)(O)O	-0.03934	0	0.179	-0.179	TN	0.0544	YES
-	784	CC(=O)Oc1ccccc1C(=O)Nc1ncc([N+](=O)[O-])s1	9.15043	1	0.6508	0.3492	TP	0.0272	YES
-	3086	COc1ncc(-c2ccc3c(Nc4cc(Oc5cc(F)cc(F)c5)cc(C(=O)O)c4)c(S(=O)(=O)NC4CC4)cnc3c2)c(OC)n1	6.51736	0	0.5156	-0.5156	FP	0.1155	YES
*	785	Cc1c(O)cccc1C(=O)NC(CSc1ccccc1)C(O)CN1CC2CCCCC2CC1C(=O)NC(C)(C)C	10.9323	1	0.7423	0.2577	TP	0.0401	YES
-	3052	Cc1cc(-c2ncc(CC(=O)Nc3ccc(-c4cnccn4)cn3)cc2C)ccn1	4.80014	0	0.4274	-0.4274	TN	1.046	No
-	836	C=CC1CN2CCC1CC2C(O)c1ccnc2ccc(OC)cc12	8.71019	1	0.6282	0.3718	TP	0.0279	YES
+	2033	CCOC(=O)COc1ccc2c(=O)cc(-c3ccccc3)oc2c1	-3.29199	0	0.012	-0.012	TN	0.0254	YES
+	858	Cc1ccc(-c2cc(C(F)(F)F)nn2-c2ccc(S(N)(=O)=O)cc2)cc1	4.27491	1	0.4005	0.5995	FN	0.0549	YES
*	3816	N#Cc1cc2cc(CN3CCC(Nc4ncnc5sc(CC(F)(F)F)cc45)CC3)c(O)cc2n1Cc1cn[nH]c1	7.13597	0	0.5473	-0.5473	FP	2.0891	No
-	966	CCCCC(CC)CN1CN(CC(CC)CCCC)CC(C)(N)C1	10.0147	1	0.6951	0.3049	TP	0.0116	YES
*	234	O=C(C1CCCCC1)N1CC(=O)N2CCc3ccccc3C2C1	0.86672	0	0.2255	-0.2255	TN	0.0273	YES
#	994	N#Cc1ccc2c(c1)N(CCCN1CCC(O)CC1)c1ccccc1S2	16.8271	1	1.0449	-0.0449	TP	0.0272	YES
-	1555	CN1C(CCl)Nc2cc(Cl)c(S(N)(=O)=O)cc2S1(=O)=O	4.20838	0	0.397	-0.397	TN	1.0347	No
*	1037	C=C1CCC2C(C)(CO)C(O)CCC2(C)C1CC=C1C(=O)OCC1O	12.7987	1	0.8381	0.1619	TP	0.0404	YES
-	1611	CCOC(=O)c1ccc(C#Cc2ccc3c(c2)C(C)(C)CCS3)nc1	1.48007	0	0.257	-0.257	TN	0.0312	YES
+	1052	O=C(NC(=O)c1c(F)cccc1F)Nc1cc(Cl)c(OC(F)(F)C(F)C(F)(F)F)cc1Cl	11.6571	1	0.7795	0.2205	TP	2.0695	No
+	2507	CNC(=O)c1ccc(N2C(=S)N(c3ccc(C#N)c(C(F)(F)F)c3)C(=O)C2(C)C)cc1F	4.40365	0	0.4071	-0.4071	TN	0.0689	YES
#	1075	Clc1ccc2c(c1)CCc1cccnc1C2=C1CCNCC1	15.8068	1	0.9925	0.0075	TP	0.029	YES
+	157	O=C(CCCN1CCC(O)(c2ccc(Cl)cc2)CC1)c1ccc(F)cc1	3.79978	0	0.3761	-0.3761	TN	0.0294	YES
-	1080	O=C1Nc2ccc(Cl)cc2C(C#CC2CC2)(C(F)(F)F)O1	11.0179	1	0.7467	0.2533	TP	0.0522	YES
+	3316	CCc1c(Cl)c(O)c(Cl)c(O)c1C(=O)OC1C(C)OC(OCC2=CC=CCC(O)C(C)=CC(CC)C(OC3OC(C)(C)C(OC(=O)C(C)C)C(O)C3O)C(C)=CC(C)=CCC(C(C)O)OC2=O)C(OC)C1O	5.75225	0	0.4763	-0.4763	TN	0.095	YES
*	1133	Cc1ccc(NC(=O)c2ccc(CN3CCN(C)CC3)cc2)cc1Nc1nccc(-c2cccnc2)n1	21.0935	1	1.2639	-0.2639	TP	0.045	YES
*	3030	CC(C)=CCCC(C)(OC1OC(COC2OC(CO)C(O)C(O)C2O)C(O)C(O)C1O)C1CCC2(C)C1C(O)CC1C3(C)CCC(OC4OC(CO)C(O)C(O)C4OC4OC(CO)C(O)C(O)C4O)C(C)(C)C3CCC12C	-3.94111	0	-0.0214	0.0214	TN	0.1013	YES
[truncated: 494 more rows]

## Sheet: Table S8
Set	ID	SMILES	DCW	Expr	Calc	Expr-Calc	Class	DefectSMILES	Applicability
[truncated: 672 more rows]

[truncated: 2 more sheets: Table S9, Table S10]
